# Supplementary material
Source: PubMed Central journal article supplement (PMC7734801)
Supplement: ml0c00405_si_001.pdf [file ml0c00405_si_001.pdf]

# Decreasing HepG2 cytotoxicity by lowering the lipophilicity of benzo[d]oxazolephosphinate ester utrophin modulators

Maria Chatzopoulou,<sup>a</sup> Enrico Emer,<sup>a</sup> Cristina Lecci,<sup>b</sup> Jessica A. Rowley,<sup>a</sup> Anne-Sophie Casagrande,<sup>d</sup> Lee Moir,<sup>e</sup> Sarah E. Squire,<sup>e</sup> Stephen G. Davies,<sup>a</sup> Shawn Harriman,<sup>c</sup> Graham M. Wynne,<sup>a</sup> Francis X. Wilson,<sup>c</sup> Kay E. Davies,<sup>e</sup> Angela J. Russell<sup>a,f\*</sup>

<sup>a</sup> Department of Chemistry, University of Oxford, Chemistry Research Laboratory, Mansfield Road, Oxford, OX1 3TA, UK

<sup>b</sup> Evotec (UK) Ltd, 114 Innovation Dr, Milton Park, Milton, Abingdon OX14 4RZ

<sup>c</sup> Summit Therapeutics plc, 136a Eastern Avenue, Milton Park, Abingdon, Oxfordshire, OX14 4SB, UK

<sup>d</sup> Evotec (France) SAS, 195 Route d'Espagne, BP13669, 31036 TOULOUSE cedex (France)

<sup>e</sup> MDUK Oxford Neuromuscular Centre, Department of Physiology, Anatomy and Genetics, University of Oxford, Oxford OX1 3PT, UK

<sup>f</sup> Department of Pharmacology, University of Oxford, Mansfield Road, Oxford, OX1 3PQ, UK

## Table of Contents

|                                   |    |
|-----------------------------------|----|
| Table S1.....                     | 2  |
| Tables S2-3.....                  | 5  |
| Figure S1.....                    | 6  |
| Equations S1-2 and Figure S2..... | 7  |
| Analytical methods for LCMS.....  | 8  |
| Experimental.....                 | 9  |
| Characterization data.....        | 29 |

**Table S1.** Molecular and physicochemical properties of phosphinate analogues. In blue are analogues that belong to the previous series of phosphinates most of which were reported previously<sup>1</sup>, in orange are analogues of the new series. Analogues presented in this publication have their designated numbers. Predicted clogP values were generated with OSIRIS Datawarrior version 5.0.0 © 2002-2019 Idorsia Pharmaceuticals Ltd. logD (SF) was measured experimentally with the shaking flask method.

| # | Molecular Formula | Total MW | cLogP | logD (SF) |
|---|-------------------|----------|-------|-----------|
| 2 | C17H15NO3F3P      | 369.278  | 4.43  | 3.80      |
| 3 | C16H15NO3FP       | 319.271  | 3.68  | 2.80      |
|   | C16H15NO3CIP      | 335.726  | 4.18  | 3.76      |
|   | C20H18NO3P        | 351.341  | 4.77  | 4.31      |
|   | C25H20NO3P        | 413.412  | 6.20  |           |
|   | C16H14NO3CI2P     | 370.171  | 4.79  |           |
|   | C16H14NO3CI2P     | 370.171  | 4.79  |           |
|   | C19H17N2O3P       | 352.329  | 3.89  |           |
|   | C18H18NO3P        | 327.319  | 4.03  |           |
|   | C18H17NO3FP       | 345.309  | 4.03  |           |
|   | C20H18NO3P        | 351.341  | 4.77  |           |
|   | C16H14NO3CI2P     | 370.171  | 4.79  | 3.96      |
|   | C18H18NO3P        | 327.319  | 4.03  |           |
|   | C21H20NO3P        | 365.368  | 5.18  |           |
|   | C18H18NO3P        | 327.319  | 4.03  |           |
|   | C21H20NO3P        | 365.368  | 5.18  |           |
|   | C17H16NO3CI2P     | 384.198  | 5.20  |           |
|   | C17H16NO3CI2P     | 384.198  | 5.20  |           |
|   | C21H20NO3P        | 365.368  | 5.18  |           |
|   | C17H16NO3CI2P     | 384.198  | 5.20  |           |
|   | C20H18NO3P        | 351.341  | 4.77  |           |
|   | C21H20NO3P        | 365.368  | 5.18  |           |
|   | C17H16NO3CI2P     | 384.198  | 5.20  |           |
|   | C17H16NO3CI2P     | 384.198  | 5.20  |           |
|   | C17H16NO3CI2P     | 384.198  | 5.20  |           |
|   | C18H18NO3CI2P     | 398.225  | 5.60  |           |
|   | C16H13NO3CI2FP    | 388.161  | 4.89  |           |
|   | C19H20NO3P        | 341.346  | 4.44  |           |
|   | C17H16NO3CI2P     | 384.198  | 5.20  |           |
|   | C21H20NO3P        | 365.368  | 5.18  |           |
|   | C22H22NO3P        | 379.395  | 5.56  |           |
|   | C18H18NO3CI2P     | 398.225  | 5.58  |           |
|   | C17H16NO3CI2P     | 384.198  | 5.20  |           |
|   | C17H16NO3CI2P     | 384.198  | 5.20  |           |
|   | C20H22NO3P        | 355.373  | 4.84  |           |
|   | C20H22NO3P        | 355.373  | 4.82  |           |
|   | C18H18NO3CI2P     | 398.225  | 5.58  |           |
|   | C18H18NO3CI2P     | 398.225  | 5.60  |           |
|   | C16H14NO3CI2P     | 370.171  | 4.79  |           |
|   | C21H16NO3CI2P     | 432.242  | 6.22  |           |
|   | C20H20NO3CI2P     | 424.263  | 5.92  |           |

|                |         |       |      |
|----------------|---------|-------|------|
| C19H17N2O3P    | 352.329 | 3.89  | 2.95 |
| C18H16NO3PS    | 357.369 | 4.42  |      |
| C19H17N2O3P    | 352.329 | 3.98  |      |
| C16H14NO3CIFP  | 353.716 | 4.28  |      |
| C17H16NO3CI2P  | 384.198 | 5.13  |      |
| C16H15NO3FP    | 319.271 | 3.68  | 2.51 |
| C16H15NO3FP    | 319.271 | 3.68  |      |
| C18H15NO3CIPS  | 391.814 | 5.26  |      |
| C16H12NO3CI2P  | 368.155 | 3.96  |      |
| C16H15NO3FP    | 319.271 | 3.68  |      |
| C18H16NO4P     | 341.302 | 4.023 |      |
| C17H17N2O3P    | 328.307 | 3.03  |      |
| C16H13NO3CIF2P | 371.706 | 4.38  |      |
| C14H13NO3CIPS  | 341.754 | 4.41  |      |
| C15H13NO4F3P   | 359.239 | 3.71  |      |
| C16H13NO3CIF2P | 371.706 | 4.38  |      |
| C19H17N2O3P    | 352.329 | 3.89  |      |
| C21H20NO3P     | 365.368 | 5.23  |      |
| C17H16NO3CI2P  | 384.198 | 5.24  |      |
| C17H16N3O3P    | 341.306 | 2.52  |      |
| C16H14NO2CI2PS | 386.238 | 4.97  |      |
| C14H13NO3CIPS  | 341.754 | 4.21  |      |
| C16H14NO3F2P   | 337.261 | 3.78  |      |
| C17H15NO3F3P   | 369.278 | 4.43  | 3.23 |
| C17H15NO3F3P   | 369.278 | 4.43  | 3.53 |
| C17H17NO3FP    | 333.298 | 4.08  | 3.48 |
| C16H14NO3F2P   | 337.261 | 3.78  | 2.95 |
| C16H14NO3F2P   | 337.261 | 3.78  |      |
| C17H15NO3F3P   | 369.278 | 4.43  |      |
| C16H15NO3FP    | 319.271 | 3.68  |      |
| C17H17NO3FP    | 333.298 | 4.08  |      |
| C16H14NO3F2P   | 337.261 | 3.78  |      |
| C17H17NO3FP    | 333.298 | 4.08  |      |
| C20H15NO3FP    | 367.315 | 4.70  |      |
| C17H15NO3F3P   | 369.278 | 4.43  |      |
| C17H17NO3FP    | 333.298 | 4.08  | 3.48 |
| C17H15NO3F3P   | 369.278 | 4.43  |      |
| C19H17N2O3P    | 352.329 | 3.89  |      |
| C17H15NO3F3P   | 369.278 | 4.43  |      |
| C19H17N2O3P    | 352.329 | 3.77  |      |
| C20H19N2O3P    | 366.356 | 4.30  |      |
| C20H15NO3FP    | 367.315 | 4.70  |      |
| C16H15NO3FP    | 319.271 | 3.68  |      |
| C16H15NO3FP    | 319.271 | 3.68  |      |
| C19H17N2O3P    | 352.329 | 3.77  |      |
| C19H17N2O3P    | 352.329 | 3.77  |      |
| C19H17N2O3P    | 352.329 | 3.89  |      |
| C19H17N2O3P    | 352.329 | 3.98  |      |

|    |               |         |      |      |
|----|---------------|---------|------|------|
|    | C20H19N2O3P   | 366.356 | 4.30 |      |
|    | C23H17N2O3P   | 400.373 | 4.92 |      |
|    | C20H19N2O3P   | 366.356 | 4.30 |      |
|    | C19H17N2O3P   | 352.329 | 3.89 |      |
|    | C20H19N2O3P   | 366.356 | 4.30 |      |
|    | C19H17N2O3P   | 352.329 | 3.89 |      |
|    | C19H17N2O3P   | 352.329 | 3.77 |      |
|    | C23H17N2O3P   | 400.373 | 4.92 |      |
|    | C19H17N2O3P   | 352.329 | 3.89 |      |
| 14 | C17H16NO3F2P  | 351.288 | 4.27 | 2.80 |
| 15 | C17H16NO3F2P  | 351.288 | 4.27 | 3.09 |
| 16 | C17H15NO3F3P  | 369.278 | 4.38 | 3.40 |
| 17 | C17H18NO4P    | 331.307 | 3.51 | 3.19 |
| 18 | C17H16NO4F2P  | 367.287 | 3.75 | 2.45 |
| 19 | C17H14NO5F2P  | 381.27  | 5.35 | 2.40 |
| 20 | C16H15N2O4F2P | 368.275 | 3.10 | 2.20 |
| 21 | C16H14N2O3F3P | 370.266 | 3.42 | 2.44 |
| 22 | C16H15N2O3F2P | 352.276 | 3.27 | 1.86 |
| 23 | C17H15NO3F3P  | 369.278 | 4.38 | 3.59 |
| 24 | C17H14NO5F2P  | 381.27  | 5.35 | 3.60 |
| 25 | C16H15N2O4F2P | 368.275 | 3.10 | 2.60 |
| 26 | C16H14N2O3F3P | 370.266 | 3.42 | 2.41 |
| 27 | C16H15N2O3F2P | 352.276 | 3.27 | 2.08 |
| 46 | C17H16NO3F2P  | 351.288 | 4.27 | 3.06 |
| 47 | C17H18NO4P    | 331.307 | 3.51 |      |
| 48 | C17H16NO4F2P  | 367.287 | 3.75 |      |
| 49 | C16H14N2O3F3P | 370.266 | 3.48 |      |
| 50 | C16H14N2O3F3P | 370.266 | 3.48 | 2.20 |
| 51 | C17H16NO3F2P  | 351.288 | 4.27 | 3.33 |
| 52 | C17H16NO3F2P  | 351.288 | 4.27 | 2.98 |
| 53 | C17H16NO4F2P  | 367.287 | 3.75 | 3.20 |
| 54 | C16H14N2O3F3P | 370.266 | 3.48 | 1.98 |
|    | C21H21NO3F3P  | 423.37  | 5.64 | 4.50 |
|    | C19H19NO3F3P  | 397.332 | 5.19 |      |
|    | C16H15NO3FP   | 319.271 | 3.68 |      |
|    | C19H17NO3F3P  | 395.316 | 4.96 |      |
|    | C16H15N2O3F2P | 352.276 | 3.33 | 2.00 |
|    | C17H16NO4F2P  | 367.287 | 3.75 | 3.42 |
|    | C20H19NO3F3P  | 409.343 | 5.30 |      |
|    | C20H24NO3P    | 357.389 | 5.16 |      |
|    | C17H18NO4P    | 331.307 | 3.51 | 2.61 |
|    | C17H18NO4P    | 331.307 | 3.51 | 2.49 |
|    | C19H18NO4F2P  | 393.325 | 4.28 | 2.80 |
|    | C18H16N2O3F3P | 396.304 | 4.01 | 2.80 |
|    | C19H18NO4F2P  | 393.325 | 4.28 | 3.60 |
|    | C19H17NO3F3P  | 395.316 | 4.96 | 4.20 |

**Table S2.** Calculated physicochemical properties and cytotoxicity of the compounds used for the clogP-cytotoxicity correlation. In orange are the data for the cpds that were considered outliers. clogP and topological polar surface area (TPSA) values were generated with generated with OSIRIS Datawarrior version 5.0.0 © 2002-2019 Idorsia Pharmaceuticals Ltd

| #     | Molecular Formula                                                              | pIC <sub>50</sub> (HepG2) | pEC <sub>50</sub> (H2K) | ratio | ClogP | TPSA  |
|-------|--------------------------------------------------------------------------------|---------------------------|-------------------------|-------|-------|-------|
| 2     | C <sub>17</sub> H <sub>15</sub> NO <sub>3</sub> F <sub>3</sub> P               | 4.23                      | 5.89                    | 1.39  | 4.43  | 62.14 |
| 3(e2) | C <sub>16</sub> H <sub>15</sub> NO <sub>3</sub> FP                             | 3.70                      | 6.91                    | 1.87  | 3.68  | 62.14 |
| 20    | C <sub>16</sub> H <sub>15</sub> N <sub>2</sub> O <sub>4</sub> F <sub>2</sub> P | 3.70                      | 6.51                    | 1.76  | 3.10  | 84.26 |
| 24    | C <sub>17</sub> H <sub>14</sub> NO <sub>5</sub> F <sub>2</sub> P               | 4.16                      | 4.00                    | 0.96  | 5.35  | 80.60 |
| 47    | C <sub>17</sub> H <sub>18</sub> NO <sub>4</sub> P                              | 3.70                      | 6.29                    | 1.70  | 3.51  | 71.37 |
| 49    | C <sub>16</sub> H <sub>14</sub> N <sub>2</sub> O <sub>3</sub> F <sub>3</sub> P | 3.70                      | 4.00                    | 1.08  | 3.48  | 75.03 |
| 55    | C <sub>19</sub> H <sub>19</sub> NO <sub>3</sub> F <sub>3</sub> P               | 7.67                      | 4.00                    | 0.52  | 5.19  | 62.14 |
| 56    | C <sub>19</sub> H <sub>17</sub> NO <sub>3</sub> F <sub>3</sub> P               | 4.88                      | 4.00                    | 0.82  | 4.96  | 62.14 |
| 57    | C <sub>20</sub> H <sub>19</sub> NO <sub>3</sub> F <sub>3</sub> P               | 5.30                      | 4.00                    | 0.75  | 5.30  | 62.14 |
|       | C <sub>16</sub> H <sub>15</sub> NO <sub>3</sub> CIP                            | 4.09                      | 6.95                    | 1.70  | 4.18  | 62.14 |
|       | C <sub>19</sub> H <sub>18</sub> NO <sub>4</sub> F <sub>2</sub> P               | 4.32                      | 5.83                    | 1.35  | 4.28  | 71.37 |
|       | C <sub>19</sub> H <sub>18</sub> NO <sub>4</sub> F <sub>2</sub> P               | 4.20                      | 4.52                    | 1.08  | 4.28  | 71.37 |
|       | C <sub>16</sub> H <sub>15</sub> NO <sub>3</sub> FP                             | 3.70                      | 4.00                    | 1.08  | 3.68  | 62.14 |
|       | C <sub>18</sub> H <sub>17</sub> NO <sub>3</sub> FP                             | 4.07                      | 6.19                    | 1.52  | 4.21  | 62.14 |

**Table S3.** Calculated clogP values with different software. From left to right: Dotmatics physicochemical properties calculator, Perkin Elmer ChemDraw version 19.1.0.8 © 1998-2020 PerkinElmer Informatics, Inc, and OSIRIS Datawarrior version 5.0.0 © 2002-2019 Idorsia Pharmaceuticals Ltd

| Cpd   | Molecular Formula                                                              | clogP     |          |             |
|-------|--------------------------------------------------------------------------------|-----------|----------|-------------|
|       |                                                                                | Dotmatics | Chemdraw | DataWarrior |
| 2     | C <sub>17</sub> H <sub>15</sub> NO <sub>3</sub> F <sub>3</sub> P               | 4.85      | 3.64     | 4.43        |
| 3(e2) | C <sub>16</sub> H <sub>15</sub> NO <sub>3</sub> FP                             | 3.96      | 2.89     | 3.68        |
| 20    | C <sub>16</sub> H <sub>15</sub> N <sub>2</sub> O <sub>4</sub> F <sub>2</sub> P | 3.62      | 2.60     | 3.10        |
| 24    | C <sub>17</sub> H <sub>14</sub> NO <sub>5</sub> F <sub>2</sub> P               | 4.57      | 4.35     | 5.35        |
| 47    | C <sub>17</sub> H <sub>18</sub> NO <sub>4</sub> P                              | 3.82      | 2.75     | 3.51        |
| 49    | C <sub>16</sub> H <sub>14</sub> N <sub>2</sub> O <sub>3</sub> F <sub>3</sub> P | 3.46      | 2.34     | 3.48        |
| 55    | C <sub>19</sub> H <sub>19</sub> NO <sub>3</sub> F <sub>3</sub> P               | 5.77      | 4.48     | 5.19        |
| 56    | C <sub>19</sub> H <sub>17</sub> NO <sub>3</sub> F <sub>3</sub> P               | 5.43      | 4.22     | 4.96        |
| 57    | C <sub>20</sub> H <sub>19</sub> NO <sub>3</sub> F <sub>3</sub> P               | 5.30      | 4.55     | 5.30        |
|       | C <sub>16</sub> H <sub>15</sub> NO <sub>3</sub> CIP                            | 4.48      | 3.46     | 4.18        |
|       | C <sub>19</sub> H <sub>18</sub> NO <sub>4</sub> F <sub>2</sub> P               | 5.09      | 3.78     | 4.28        |
|       | C <sub>19</sub> H <sub>18</sub> NO <sub>4</sub> F <sub>2</sub> P               | 5.09      | 3.78     | 4.28        |
|       | C <sub>16</sub> H <sub>15</sub> NO <sub>3</sub> FP                             | 3.96      | 2.89     | 3.68        |
|       | C <sub>18</sub> H <sub>17</sub> NO <sub>3</sub> FP                             | 4.53      | 3.47     | 4.21        |

**Figure S1.** Physicochemical properties' plots a) MW-clogP b) MW-logD between previous (blue)<sup>1</sup> and new (orange) analogues showing decrease in lipophilicity and the move to optimal chemical space (grey area). Experimental logD (b) was measured with the shaking flask method for selected analogues. Predicted clogP (a) was generated with OSIRIS Datawarrior version 5.0.0 © 2002-2019 Idorsia Pharmaceuticals Ltd.

a)

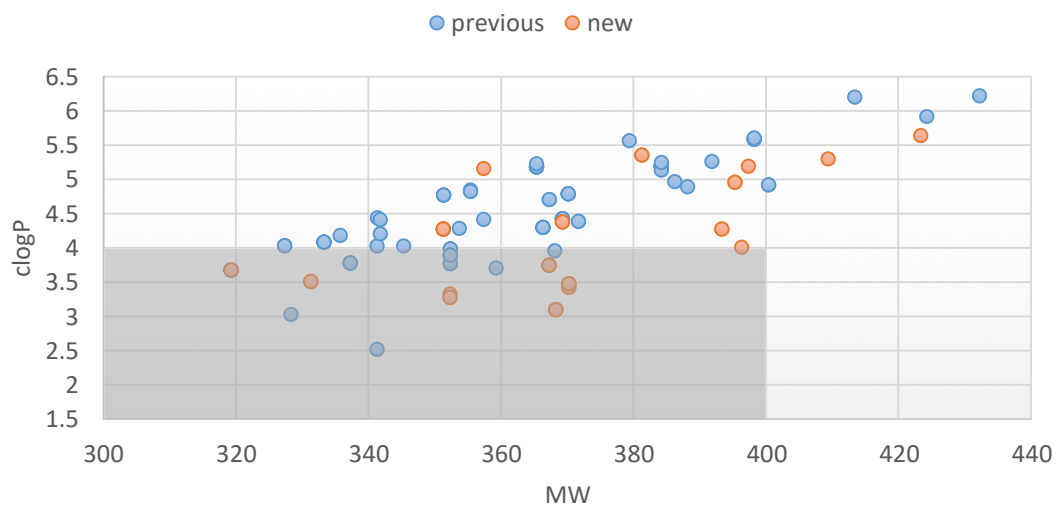

b)

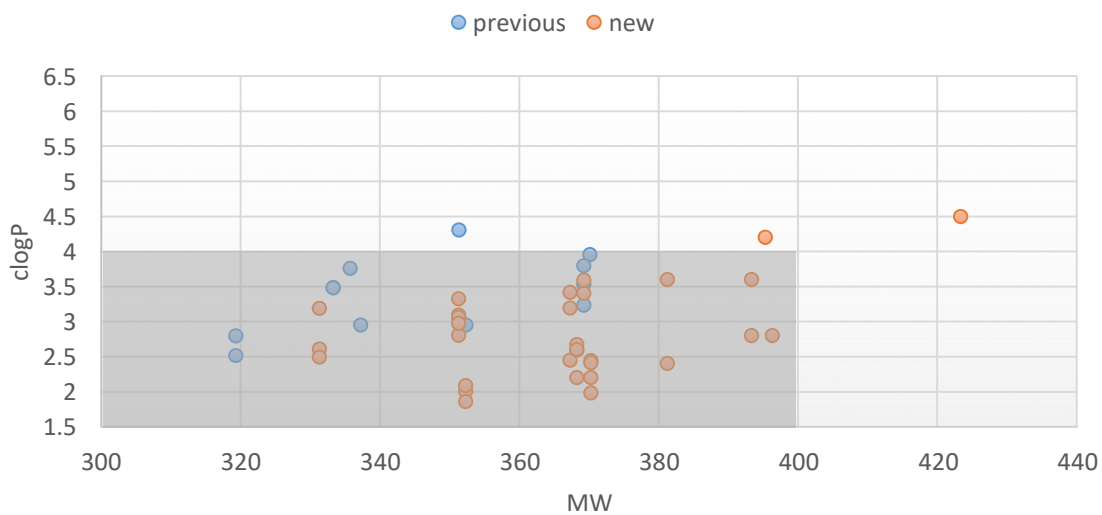

## Equations S1 and S2

$$y = 0.9862x + 0.1893 \quad (\text{eq. 1})$$

$$(n = 14, R^2 = 0.4589)$$

$$y = 0.7698x + 0.9853 \quad (\text{eq. 2})$$

$$(n = 12, R^2 = 0.9081)$$

**Figure S2.** a) Correlation between cytotoxicity in HepG2 cells and lipophilicity as expressed from their  $\text{pIC}_{50}$  and  $\text{clogP}$  plot ( $n = 14$ ). Predicted  $\text{clogP}$  (a) was generated with OSIRIS Datawarrior version 5.0.0 © 2002-2019 Idorsia Pharmaceuticals Ltd. In yellow are the two outliers b) Only a weak but negative correlation was shown when the ratio  $\text{pEC}_{50}[\text{H2K}]/\text{pIC}_{50}[\text{HepG2}]$  was plotted against  $\text{ClogP}$ .

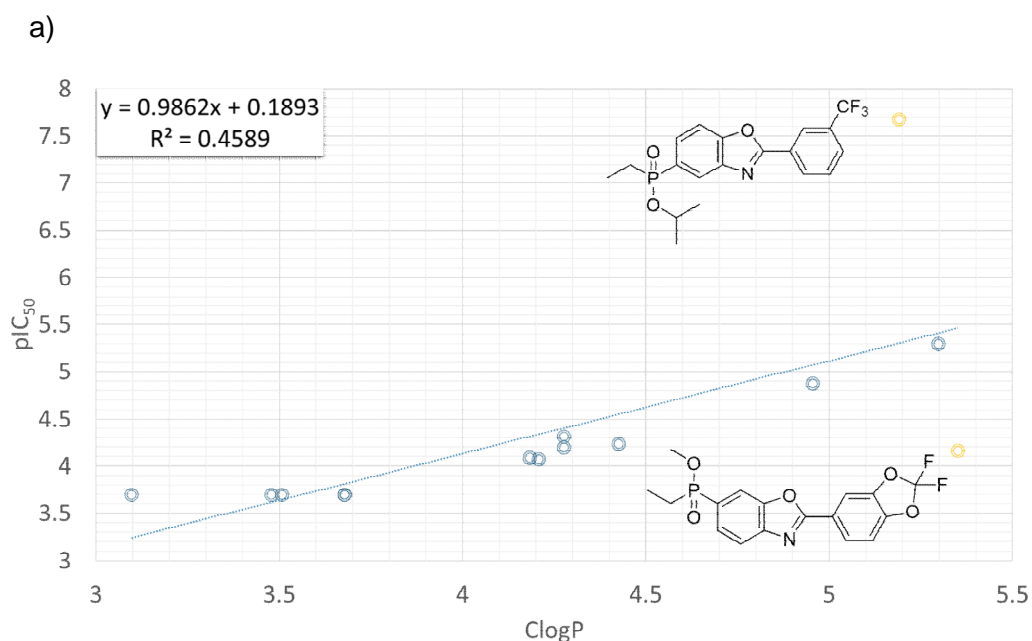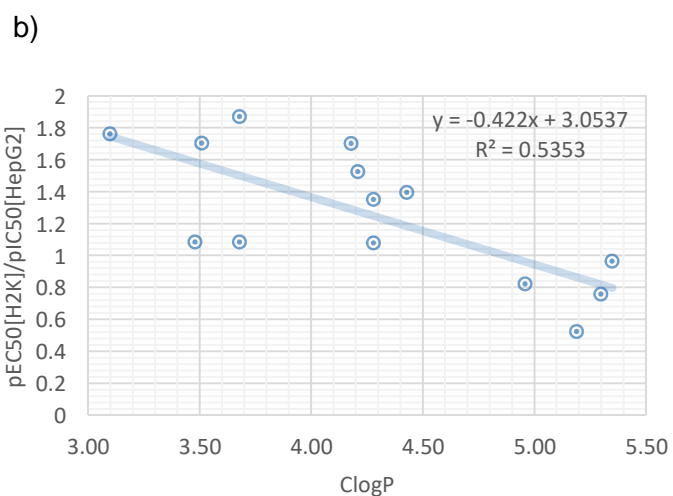

## Analytical methods used for LCMS

### Method A

MET/u-HPLC (MSQ1 low pH 7 min method)

Column: Phenomenex Kinetex-XB C18, 2.1 mm x 100 mm, 1.7  $\mu$ m

Flow rate: 0.6 ml/min

Mobile Phase: A, Formic acid (aqueous) 0.1% and B, Formic acid (MeCN) 0.1%

Injection Vol: 3  $\mu$ l

Temp.: 40  $^{\circ}$ C

Detection: 215 nm (nominal)

Gradient Time (minutes) - % B

0.00 - 5

5.30 - 100

5.80 - 100

5.82 - 5

### Method B

METCR 1410 (low pH Shimadzu 2min method) - IPC

Column: Kinetex Core-Shell C18, 2.1mmx50mm, 5 $\mu$ m column

Flow rate: 1.2 ml/min

Mobile Phase: A, Formic acid (aqueous) 0.1% and B, Formic acid (acetonitrile) 0.1%

Injection Vol: 3  $\mu$ l

Temp.: 40  $^{\circ}$ C

Detection: 215 nm (nominal)

Gradient Time (minutes) - % B

0.00 - 5

1.20 - 100

1.30 - 100

1.31 - 5



## Experimental

### Chemistry

**General Experimental.** All reactions involving moisture-sensitive reagents were carried out under a nitrogen or argon atmosphere using standard vacuum line techniques and glassware that was flame dried and cooled under nitrogen before use. Water was purified by an Elix® UV-10 system. All other reagents were used as supplied (analytical or HPLC grade) without prior purification. Thin layer chromatography was performed on aluminium plates coated with 60 F254 silica. Flash column chromatography was performed either on Kieselgel 60 silica on a glass column, or on a Biotage SP4 automated flash column chromatography platform. Melting points were recorded on a EZ-Melt Automated Melting Point Apparatus (EZ Melt) and are uncorrected. NMR spectra were recorded on Bruker Avance III spectrometers (at 400 or 500 MHz) using the deuterated solvent stated and at RT. The field was locked by external referencing to the relevant deuterium resonance. Accurate mass measurements were run on either a Bruker MicroTOF internally calibrated with polyalanine, or a Micromass GCT instrument fitted with a Scientific Glass Instruments BPX5 column (15 m × 0.25 mm) using amyl acetate as a lock mass. For preparative HPLC the instrument used was a Waters Acquity H-Class consisting of an Acquity UPLC PDA Detector, an Acquity Quaternary Solvent Manager, and an Acquity QDa mass detector. Two general methods were used: 1) a basic method, where the column was an XBridge™ C18 10 µm particle size (30 × 100 mm); 5-95% gradient of MeCN (0.2% NH<sub>4</sub>OH) in H<sub>2</sub>O over 14 min, and the flow rate was 40 mL/min; 2) an acidic method, where the column was an Sunfire™ C18 10 µm particle size (30 × 100 mm); 5-95% gradient of MeCN (0.1% HCOOH) in H<sub>2</sub>O over 14 min, and the flow rate was 40 mL/min. Experiments conducted at Contract Research Organisations used their standard equipment.

### Acid chlorides

The acid chlorides used were either commercially available or synthesised from the respective carboxylic acids and oxalyl or sulfonyl chloride. The yield was assumed to be quantitative.

### General procedure 1: Pd-catalysed C-P bond formation (6, 7, 37-45)

To a degassed solution of 2-aryl bromobenzo[d]oxazole or bromophenyl derivative (1 eq), DIPEA (2.1 eq) and ethylphosphinic acid (2 eq) in DME (0.7 M) and toluene (0.3 M) Pd(OAc)<sub>2</sub> (0.06 eq) and xantphos (0.06 eq) were added under N<sub>2</sub> and the reaction was heated to 90°C for 2 h. The solvents were evaporated *in vacuo*, and the residue partitioned between EtOAc and NaOH (1M). The aqueous layer was extracted with EtOAc, acidified with 1M HCl (pH 3) and extracted with EtOAc. The combined organic layers were washed with brine, dried over Na<sub>2</sub>SO<sub>4</sub>, and concentrated *in vacuo* to afford the title compounds.

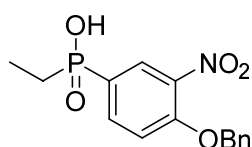

(4-(Benzyloxy)-3-nitrophenyl)(ethyl)phosphinic acid (**6**)

The title compound was prepared from **4** and isolated as a brown oil (715 mg, 71%). <sup>1</sup>H NMR (500 MHz, DMSO-*d*<sub>6</sub>) δ 8.13 (dd, *J* = 11.1, 1.8 Hz, 1H), 7.93 (ddd, *J* = 10.3, 8.6, 1.9 Hz, 1H), 7.58 (dd, *J* = 8.6, 2.2 Hz, 1H), 7.48 – 7.45 (m, 2H), 7.45 – 7.39 (m, 2H), 7.39 – 7.28 (m, 1H), 5.38 (s, 2H), 1.78 (dq, *J* = 15.2, 7.6 Hz, 2H), 0.93 (dt, *J* = 18.7, 7.6 Hz, 4H). LC-MS (215 nm, 97%) R<sub>T</sub> 1.04 min, MS (ESI): mass calculated for C<sub>15</sub>H<sub>16</sub>NO<sub>5</sub>P, 321.08; *m/z* found 321.85 [M + H]<sup>+</sup>, 319.90 ([M - H]<sup>-</sup>).

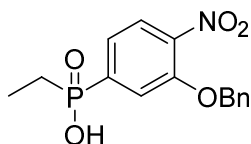

*(3-(Benzyloxy)-4-nitrophenyl)(ethyl)phosphinic acid (7)*

The title compound was prepared from **5** and isolated as a brown solid (3.5 g, 93%). <sup>1</sup>H NMR (500 MHz, DMSO-*d*<sub>6</sub>) δ 7.98 (dd, *J* = 8.0, 3.2 Hz, 1H), 7.66 (dd, *J* = 12.2, 1.3 Hz, 1H), 7.48 – 7.37 (m, 5H), 7.37 – 7.32 (m, 1H), 5.37 (s, 2H), 1.79 (dq, *J* = 15.2, 7.7 Hz, 2H), 0.90 (dt, *J* = 18.7, 7.7 Hz, 3H). LC-MS (215 nm, 97%) R<sub>T</sub> 1.01 min, MS (ESI): mass calculated for C<sub>15</sub>H<sub>16</sub>NO<sub>5</sub>P, 321.08; *m/z* found 321.90 [M + H]<sup>+</sup>.

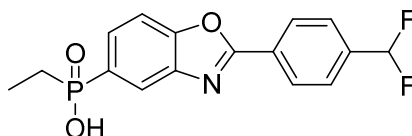

*(2-(4-(Difluoromethyl)phenyl)benzo[d]oxazol-5-yl)(ethyl)phosphinic acid (37)*

The title compound was prepared from **28** and isolated as a pink solid (170 mg, 71%). <sup>1</sup>H NMR (500 MHz, DMSO-*d*<sub>6</sub>) δ 8.36 (d, *J* = 8.2 Hz, 2H), 8.12 (d, *J* = 11.4 Hz, 1H), 7.93 (dd, *J* = 8.3, 1.9 Hz, 1H), 7.83 (d, *J* = 7.4 Hz, 2H), 7.81 – 7.78 (m, 1H), 7.17 (t, *J* = 55.6 Hz, 1H), 1.80 (dq, *J* = 15.2, 7.6 Hz, 2H), 0.95 (dt, *J* = 18.3, 7.6 Hz, 3H). LC-MS (215 nm, 96%) R<sub>T</sub> 1.03 min, MS (ESI): mass calculated for C<sub>16</sub>H<sub>14</sub>F<sub>2</sub>NO<sub>3</sub>P, 337.07; *m/z* found 337.95 [M + H]<sup>+</sup>.

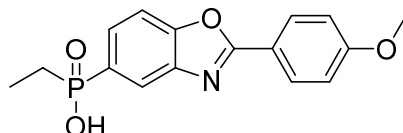

*Ethyl(2-(4-methoxyphenyl)benzo[d]oxazol-5-yl)phosphinic acid (38)*

The title compound was prepared from **29** and isolated as a pink solid (411 mg, 83%). <sup>1</sup>H NMR (500 MHz, DMSO-*d*<sub>6</sub>) δ 8.20 – 8.14 (m, 2H), 8.04 (dd, *J* = 11.5, 1.5 Hz, 1H), 7.87 (dd, *J* = 8.3, 2.2 Hz, 1H), 7.73 (ddd, *J* = 10.9, 8.2, 1.4 Hz, 1H), 7.20 – 7.15 (m, 2H), 3.87 (s, 3H), 1.80 (dq, *J* = 15.2, 7.6 Hz, 2H), 0.95 (dt, *J* = 18.4, 7.6 Hz, 3H). LC-MS (215 nm, 99%) R<sub>T</sub> 1.03 min, MS (ESI): mass calculated for C<sub>16</sub>H<sub>16</sub>NO<sub>4</sub>P, 317.08; *m/z* found 317.85 [M + H]<sup>+</sup>.

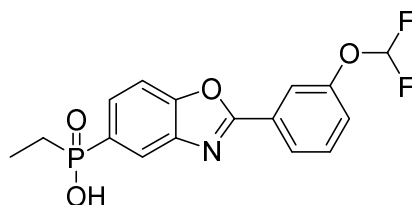

*(2-(3-(Difluoromethoxy)phenyl)benzo[d]oxazol-5-yl)(ethyl)phosphinic acid (39)*

The title compound was prepared from **30** and isolated as pink oil (150 mg, 77%). <sup>1</sup>H NMR (250 MHz, DMSO-*d*<sub>6</sub>) δ 8.13 (dt, *J* = 5.5, 1.1 Hz, 1H), 8.09 (q, *J* = 1.2 Hz, 1H), 7.98 – 7.89 (m, 2H), 7.84 – 7.77 (m, 1H), 7.77 – 7.63 (m, 1H), 7.52 – 7.43 (m, 1H), 7.43 (t, *J* = 73.6 Hz, 1H),

1.79 (dq,  $J = 15.1, 7.6$  Hz, 2H), 0.94 (dt,  $J = 18.2, 7.6$  Hz, 3H). LC-MS (215 nm, 94%)  $R_T$  1.06 min, MS (ESI): mass calculated for  $C_{16}H_{14}F_2NO_4P$ , 353.06;  $m/z$  found 353.85  $[M + H]^+$ .

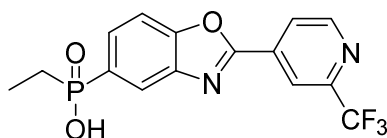

*Ethyl(2-(2-(trifluoromethyl)pyridin-4-yl)benzo[d]oxazol-5-yl)phosphinic acid (40)*

The title compound was prepared from **31** and isolated as pink oil (170 mg, 82%).  $^1H$  NMR (500 MHz,  $DMSO-d_6$ )  $\delta$  9.06 (d,  $J = 5.0$  Hz, 1H), 8.47 (d,  $J = 1.0$  Hz, 1H), 8.45 (dd,  $J = 5.0, 1.6$  Hz, 1H), 8.20 (dd,  $J = 11.5, 1.2$  Hz, 1H), 8.01 (dd,  $J = 8.4, 2.3$  Hz, 1H), 7.88 (ddd,  $J = 9.9, 8.3, 1.4$  Hz, 1H), 1.80 (dt,  $J = 15.1, 7.6$  Hz, 2H), 0.95 (dt,  $J = 18.4, 7.6$  Hz, 3H). LC-MS (215 nm, 99%)  $R_T$  1.01 min, MS (ESI): mass calculated for  $C_{15}H_{12}F_3N_2O_3P$ , 356.05;  $m/z$  found 356.80  $[M + H]^+$ .

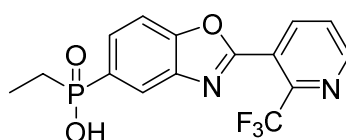

*Ethyl(2-(2-(trifluoromethyl)pyridin-3-yl)benzo[d]oxazol-5-yl)phosphinic acid (41)*

The title compound was prepared from **32** and isolated as a white solid (149 mg, 73%).  $^1H$  NMR (500 MHz,  $DMSO-d_6$ )  $\delta$  9.01 (dd,  $J = 4.7, 1.5$  Hz, 1H), 8.66 (dd,  $J = 8.0, 1.6$  Hz, 1H), 8.20 (d,  $J = 11.5$  Hz, 1H), 8.04 – 7.96 (m, 2H), 7.87 (ddd,  $J = 10.3, 8.4, 1.4$  Hz, 1H), 1.84 (dq,  $J = 15.1, 7.6$  Hz, 2H), 0.96 (dt,  $J = 18.5, 7.7$  Hz, 3H). LC-MS (215 nm, 98%)  $R_T$  0.97 min, MS (ESI): mass calculated for  $C_{15}H_{12}F_3N_2O_3P$ , 356.05;  $m/z$  found 356.95  $[M + H]^+$ , 354.95  $[M - H]^-$ .

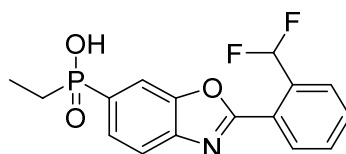

*2-(2-(Difluoromethyl)phenyl)benzo[d]oxazol-6-yl(ethyl)phosphinic acid (42)*

The title compound was prepared from **33** and isolated as a brown solid (180 mg, 91%).  $^1H$  NMR (500 MHz,  $DMSO-d_6$ )  $\delta$  8.31 – 8.25 (m, 1H), 8.08 (d,  $J = 11.4$  Hz, 1H), 7.94 (dd,  $J = 8.2, 2.4$  Hz, 2H), 7.92 (t,  $J = 54.6$  Hz, 1H), 7.84 – 7.78 (m, 2H), 7.78 – 7.74 (m, 1H), 1.76 (dt,  $J = 15.2, 7.5$  Hz, 3H), 0.93 (dt,  $J = 18.2, 7.6$  Hz, 3H). LC-MS (215 nm, 95%)  $R_T$  1.05 min, MS (ESI): mass calculated for  $C_{16}H_{14}F_2NO_3P$ , 337.07;  $m/z$  found 337.95  $[M + H]^+$ .

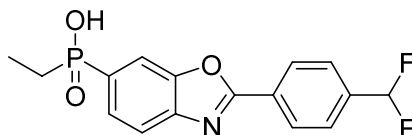

*2-(4-(Difluoromethyl)phenyl)benzo[d]oxazol-6-yl(ethyl)phosphinic acid (43)*

The title compound was prepared from **34** and isolated as a pink solid (150 mg, 72%).  $^1H$  NMR (500 MHz,  $DMSO-d_6$ )  $\delta$  8.36 (d,  $J = 8.1$  Hz, 2H), 8.08 (d,  $J = 11.5$  Hz, 1H), 7.94 (dd,  $J = 8.0, 2.0$  Hz, 1H), 7.83 (d,  $J = 8.2$  Hz, 2H), 7.80 – 7.73 (m, 1H), 7.18 (t,  $J = 55.6$  Hz, 1H), 1.81 (dq,  $J = 15.2, 7.6$  Hz, 2H), 0.95 (dt,  $J = 18.4, 7.6$  Hz, 3H). LC-MS (215 nm, 97%)  $R_T$  1.01 min, MS (ESI): mass calculated for  $C_{16}H_{14}F_2NO_3P$ , 337.07;  $m/z$  found 337.95  $[M + H]^+$ .

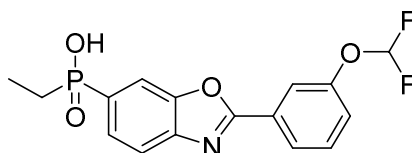

***2-(3-(Difluoromethoxy)phenyl)benzo[d]oxazol-6-yl(ethyl)phosphinic acid (44)***

The title compound was prepared from **35** and isolated as a brown oil (540 mg, 98%). <sup>1</sup>H NMR (500 MHz, DMSO-*d*<sub>6</sub>) δ 8.13 – 8.06 (m, 2H), 7.99 – 7.93 (m, 2H), 7.77 (ddd, *J* = 10.8, 8.1, 1.2 Hz, 1H), 7.71 (t, *J* = 8.0 Hz, 1H), 7.49 (dd, *J* = 8.2, 2.6 Hz, 1H), 7.43 (t, *J* = 73.6 Hz, 1H), 1.83 (dq, *J* = 15.2, 7.6 Hz, 2H), 0.95 (dt, *J* = 18.5, 7.6 Hz, 3H). LC-MS (215 nm, 97%) R<sub>T</sub> 1.04 min, MS (ESI): mass calculated for C<sub>16</sub>H<sub>14</sub>F<sub>2</sub>NO<sub>4</sub>P, 353.06; *m/z* found 353.85 [M + H]<sup>+</sup>, 351.85 [M - H]<sup>-</sup>.

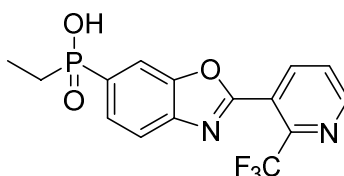

***Ethyl(2-(2-(trifluoromethyl)pyridin-3-yl)benzo[d]oxazol-6-yl)phosphinic acid (45)***

The title compound was prepared from **36** and isolated as a white solid (187 mg, 94%). <sup>1</sup>H NMR (500 MHz, DMSO-*d*<sub>6</sub>) δ 9.02 (dd, *J* = 4.7, 1.3 Hz, 1H), 8.66 (dd, *J* = 8.0, 1.1 Hz, 1H), 8.13 (d, *J* = 11.6 Hz, 1H), 8.04 (dd, *J* = 8.1, 2.4 Hz, 1H), 8.01 (dd, *J* = 8.0, 4.8 Hz, 1H), 7.83 (ddd, *J* = 10.6, 8.1, 1.1 Hz, 1H), 1.91 – 1.77 (m, 2H), 0.96 (dt, *J* = 18.6, 7.6 Hz, 3H). LC-MS (215 nm, 100%) R<sub>T</sub> 0.97 min, MS (ESI): mass calculated for C<sub>15</sub>H<sub>12</sub>F<sub>3</sub>N<sub>2</sub>O<sub>3</sub>P, 356.05; *m/z* found 356.90 [M + H]<sup>+</sup>, 354.95 ([M - H]<sup>-</sup>).

**General procedure 2: Formation of methyl phosphinates (8, 14, 46-54)**

To a solution of ethylphosphinic acid derivative (1 eq) in SOCl<sub>2</sub> (0.15 M) catalytic DMF was added and the mixture was heated to 70 °C for 1 h. The solvents were evaporated in *vacuo*, the residue was dissolved in CH<sub>2</sub>Cl<sub>2</sub> (0.1 M) and added dropwise to an ice-cold (0 °C) solution of DIPEA (3.5 eq) and DMAP (2 eq) in MeOH (0.3 M relative to DMAP) and CH<sub>2</sub>Cl<sub>2</sub> (0.2 M relative to DMAP). The reaction mixture was stirred for 30 min at RT, concentrated in *vacuo* and the residue diluted with CH<sub>2</sub>Cl<sub>2</sub>, washed with aqueous HCl (1 M), sat. NaHCO<sub>3</sub>, dried over Na<sub>2</sub>SO<sub>4</sub>, and concentrated *in vacuo*. The residue was purified by HPLC (acidic method) to afford the title compounds.

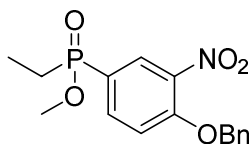

***Methyl (4-(benzyloxy)-3-nitrophenyl)(ethyl)phosphinate (8)***

The title compound was prepared from **6** and isolated as a yellow oil (3.46 g, 10.32 mmol, 81%). <sup>1</sup>H NMR (500 MHz, DMSO-*d*<sub>6</sub>) δ 8.17 (dd, *J* = 11.1, 1.9 Hz, 1H), 7.96 (ddd, *J* = 10.4, 8.6, 1.9 Hz, 1H), 7.63 (dd, *J* = 8.7, 2.3 Hz, 1H), 7.51 – 7.45 (m, 2H), 7.45 – 7.41 (m, 2H), 7.39 – 7.32 (m, 1H), 5.40 (s, 2H), 3.52 (d, *J* = 11.0 Hz, 3H), 2.03 – 1.87 (m, 2H), 0.95 (dt, *J* = 19.2, 7.7 Hz, 3H). LCMS (215 nm, 100%) R<sub>T</sub> 1.12 min, MS (ESI): mass calculated for C<sub>16</sub>H<sub>18</sub>NO<sub>5</sub>P, 335.09; *m/z* found 335.85 [M + H]<sup>+</sup>.

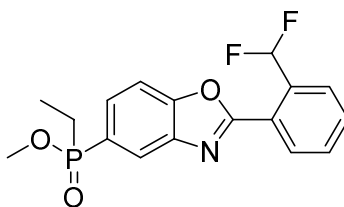

**Methyl (2-(2-(difluoromethyl)phenyl)benzo[d]oxazol-5-yl)(ethyl)phosphinate (14)**

The title compound was prepared from **14a** and isolated as a brown oil (45 mg, 85%). <sup>1</sup>H NMR (500 MHz, DMSO-*d*<sub>6</sub>) δ 8.33 – 8.27 (m, 1H), 8.22 (dd, *J* = 11.6, 1.4 Hz, 1H), 8.03 (dd, *J* = 8.3, 2.3 Hz, 1H), 7.97 – 7.93 (m, 1H), 7.92 (t, *J* = 54.7 Hz, 1H), 7.88 – 7.82 (m, 3H), 3.54 (d, *J* = 11.0 Hz, 3H), 2.08 – 1.96 (m, 2H), 0.98 (dt, *J* = 19.0, 7.6 Hz, 3H). <sup>13</sup>C NMR (125.5 MHz, DMSO-*d*<sub>6</sub>) δ 161.5, 152.3, 141.5 (d, *J* = 17.1 Hz), 133.2 (t, *J* = 22.5 Hz), 132.5, 131.6, 130.1, 129.4 (d, *J* = 10.8 Hz), 127.1 (d, *J* = 121.1 Hz), 126.3 (t, *J* = 7.0 Hz), 124.4 (t, *J* = 5.7 Hz), 123.8 (d, *J* = 11.2 Hz), 112.3 (t, *J* = 235.7 Hz), 111.9 (d, *J* = 13.4 Hz), 50.8 (d, *J* = 6.6 Hz), 21.1 (d, *J* = 101.9 Hz), 5.8 (d, *J* = 4.6 Hz). <sup>31</sup>P NMR {H} (162 MHz, DMSO-*d*<sub>6</sub>) δ 46.7. <sup>19</sup>F NMR (376 MHz, DMSO-*d*<sub>6</sub>) δ -111.8 (d, *J* = 54.7 Hz). LC-MS (215 nm, 100%) R<sub>T</sub> 1.15 min, MS (ESI): mass calculated for C<sub>17</sub>H<sub>16</sub> F<sub>2</sub>NO<sub>3</sub>P, 351.08; *m/z* found 351.90 [M + H]<sup>+</sup>. HRMS (ESI): *m/z* calculated for C<sub>17</sub>H<sub>16</sub> F<sub>2</sub>NO<sub>3</sub>P + H<sup>+</sup> [M + H]<sup>+</sup>: 352.09086. Found: 352.09021.

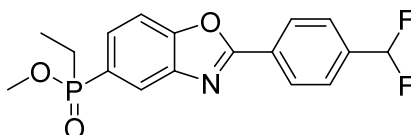

**Methyl (2-(4-(difluoromethyl)phenyl)benzo[d]oxazol-5-yl)(ethyl)phosphinate (46)**

The title compound was prepared from **37** and isolated as a white solid (100 mg, 56%). mp 60-63 °C. <sup>1</sup>H NMR (500 MHz, DMSO-*d*<sub>6</sub>) δ 8.37 (d, *J* = 8.0 Hz, 2H), 8.18 (dd, *J* = 11.6, 1.4 Hz, 1H), 8.02 (dd, *J* = 8.4, 2.3 Hz, 1H), 7.84 (d, *J* = 8.2 Hz, 2H), 7.83 (ddd, *J* = 10.8, 8.3, 1.4 Hz, 1H), 7.18 (t, *J* = 55.6 Hz, 1H), 3.54 (d, *J* = 10.9 Hz, 3H), 2.06 – 1.94 (m, 2H), 0.98 (dt, *J* = 18.9, 7.6 Hz, 3H). <sup>13</sup>C NMR (125.5 MHz, DMSO-*d*<sub>6</sub>) δ 163.2, 153.2, 142.1 (d, *J* = 16.5 Hz), 137.8 (t, *J* = 22.4 Hz), 129.7 (d, *J* = 11.3 Hz), 128.7, 128.6, 127.6 (d, *J* = 121.1 Hz), 127.3 (t, *J* = 6.1 Hz), 124.2 (d, *J* = 10.8 Hz), 114.8 (t, *J* = 236.5 Hz), 112.3 (d, *J* = 14.1 Hz), 51.3 (d, *J* = 6.6 Hz), 21.7 (d, *J* = 101.3 Hz), 6.3 (d, *J* = 4.7 Hz). <sup>31</sup>P NMR {H} (162 MHz, DMSO-*d*<sub>6</sub>) δ 46.8. <sup>19</sup>F NMR (376 MHz, DMSO-*d*<sub>6</sub>) δ -111.1 (d, *J* = 55.3 Hz). LC-MS (254 nm, 100%) R<sub>T</sub> 3.05 min, MS (ESI): mass calculated for C<sub>17</sub>H<sub>16</sub> F<sub>2</sub>NO<sub>3</sub>P, 351.1; *m/z* found 352.1 [M + H]<sup>+</sup>. HRMS (ESI): *m/z* calculated for C<sub>17</sub>H<sub>16</sub> F<sub>2</sub>NO<sub>3</sub>P + H<sup>+</sup> [M + H]<sup>+</sup>: 352.09086. Found: 352.09017.

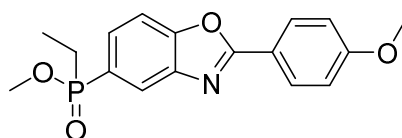

**Methyl ethyl(2-(4-methoxyphenyl)benzo[d]oxazol-5-yl)phosphinate (47)**

The title compound was prepared from **38** and isolated as a colourless oil (41 mg, 65%). <sup>1</sup>H NMR (500 MHz, DMSO-*d*<sub>6</sub>) δ 8.20 – 8.15 (m, 2H), 8.08 (dt, *J* = 11.6, 1.0 Hz, 1H), 7.94 (ddd, *J* = 8.3, 2.4, 0.6 Hz, 1H), 7.75 (ddd, *J* = 10.8, 8.3, 1.4 Hz, 1H), 7.22 – 7.15 (m, 2H), 3.88 (s, 3H), 3.53 (d, *J* = 10.9 Hz, 3H), 2.07 – 1.91 (m, 2H), 0.97 (dt, *J* = 18.9, 7.7 Hz, 3H). <sup>13</sup>C NMR (125.5 MHz, DMSO-*d*<sub>6</sub>) δ 163.7, 162.6, 152.6, 142.0 (d, *J* = 17.2 Hz), 129.5, 128.4 (d, *J* = 11.4 Hz), 126.6 (d, *J* = 121.6 Hz), 122.9 (d, *J* = 11.5 Hz), 118.3, 114.9, 111.4 (d, *J* = 13.7 Hz), 55.6, 50.8 (d, *J* = 6.4 Hz), 21.2 (d, *J* = 101.7 Hz), 5.8 (d, *J* = 4.7 Hz). <sup>31</sup>P NMR {H} (162 MHz, DMSO-*d*<sub>6</sub>) δ 43.9. LCMS (215 nm, 100%) R<sub>T</sub> 1.31 min, MS (ESI): mass calculated for C<sub>17</sub>H<sub>18</sub>NO<sub>4</sub>P, 331.10; *m/z* found 331.90 [M + H]<sup>+</sup>. HRMS (ESI): *m/z* calculated for C<sub>17</sub>H<sub>18</sub>NO<sub>4</sub>P + H<sup>+</sup> [M + H]<sup>+</sup>: 332.1046. Found: 332.1048.

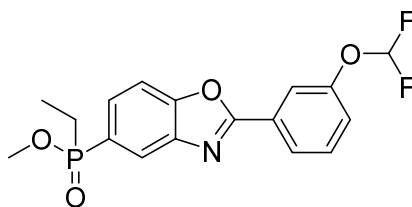

**Methyl (2-(3-(difluoromethoxy)phenyl)benzo[d]oxazol-5-yl)(ethyl)phosphinate (48)**

The title compound was prepared from **39** and isolated as a pale yellow oil (76 mg, 68%). <sup>1</sup>H NMR (500 MHz, DMSO-*d*<sub>6</sub>) δ 8.17 (dt, *J* = 11.5, 0.9 Hz, 1H), 8.11 (dt, *J* = 7.7, 1.3 Hz, 1H), 8.01 (dd, *J* = 8.3, 2.3 Hz, 1H), 7.96 (t, *J* = 2.1 Hz, 1H), 7.82 (ddd, *J* = 10.8, 8.3, 1.4 Hz, 1H), 7.72 (t, *J* = 8.0 Hz, 1H), 7.50 (dd, *J* = 8.0, 2.5 Hz, 1H), 7.43 (t, *J* = 73.6 Hz, 1H), 3.54 (d, *J* = 10.9 Hz, 3H), 2.07 – 1.93 (m, 2H), 0.98 (dt, *J* = 19.0, 7.7 Hz, 3H). <sup>13</sup>C NMR (125.5 MHz, DMSO-*d*<sub>6</sub>) δ 162.5, 152.7, 151.4, 141.6 (d, *J* = 17.2 Hz), 131.5, 129.2 (d, *J* = 10.9 Hz), 127.8, 127.6, 126.6, 124.4, 123.6 (d, *J* = 11.3 Hz), 122.9, 117.2, 116.3 (t, *J* = 258.7 Hz), 111.8 (d, *J* = 13.5 Hz), 50.8 (d, *J* = 6.6 Hz), 21.2 (d, *J* = 101.9 Hz), 5.8 (d, *J* = 4.7 Hz). <sup>31</sup>P NMR {H} (162 MHz, DMSO-*d*<sub>6</sub>) δ 46.8. <sup>19</sup>F NMR (376 MHz, DMSO-*d*<sub>6</sub>) δ -82.6 (d, *J* = 73.8 Hz). LC-MS (215 nm, 100%) R<sub>T</sub> 1.16 min, MS (ESI): mass calculated for C<sub>17</sub>H<sub>16</sub>F<sub>2</sub>NO<sub>4</sub>P, 367.08; *m/z* found 367.90 [M + H]<sup>+</sup>. HRMS (ESI): *m/z* calculated for C<sub>17</sub>H<sub>16</sub> F<sub>2</sub>NO<sub>4</sub>P + H<sup>+</sup> [M + H]<sup>+</sup>: 368.05878. Found: 368.05602.

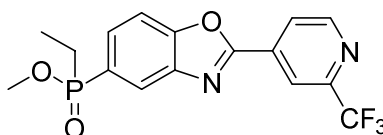

**Methyl ethyl(2-(2-(trifluoromethyl)pyridin-4-yl)benzo[d]oxazol-5-yl)phosphinate (49)**

The title compound was prepared from **40** and isolated as a pale brown oil (95 mg, 68%). <sup>1</sup>H NMR (500 MHz, DMSO-*d*<sub>6</sub>) δ 9.08 (d, *J* = 5.0 Hz, 1H), 8.49 (t, *J* = 1.2 Hz, 1H), 8.46 (dd, *J* = 5.1, 1.5 Hz, 1H), 8.27 (dt, *J* = 11.7, 1.0 Hz, 1H), 8.08 (dd, *J* = 8.5, 2.3 Hz, 1H), 7.90 (ddd, *J* = 10.7, 8.3, 1.4 Hz, 1H), 3.54 (d, *J* = 10.9 Hz, 3H), 2.10 – 1.93 (m, 2H), 0.98 (dt, *J* = 19.0, 7.7 Hz, 3H). <sup>13</sup>C NMR (125.5 MHz, DMSO-*d*<sub>6</sub>) δ 160.5, 152.8, 151.9, 147.7 (q, *J* = 34.7 Hz), 141.3 (d, *J* = 17.1 Hz), 135.5, 130.1 (d, *J* = 11.3 Hz), 127.7 (d, *J* = 120.6 Hz), 124.7, 124.4 (d, *J* = 11.3 Hz), 121.3 (q, *J* = 273.7 Hz), 117.9, 112.3 (d, *J* = 13.4 Hz), 50.9 (d, *J* = 6.6 Hz), 21.1 (d, *J* = 101.3 Hz), 5.8 (d, *J* = 4.8 Hz). <sup>31</sup>P NMR {H} (162 MHz, DMSO-*d*<sub>6</sub>) δ 46.5. <sup>19</sup>F NMR (376 MHz, DMSO-*d*<sub>6</sub>) δ -66.8. LCMS (254 nm, 100%) R<sub>T</sub> 2.92 min, MS (ESI): mass calculated for C<sub>16</sub>H<sub>14</sub>F<sub>3</sub>N<sub>2</sub>O<sub>3</sub>P, 370.1; *m/z* found 371.1 [M + H]<sup>+</sup>. HRMS (ESI): *m/z* calculated for C<sub>16</sub>H<sub>14</sub>F<sub>3</sub>N<sub>2</sub>O<sub>3</sub>P + H<sup>+</sup> [M + H]<sup>+</sup>: 371.0767. Found: 371.0768.

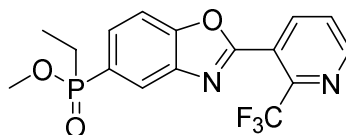

**Methyl ethyl(2-(2-(trifluoromethyl)pyridin-3-yl)benzo[d]oxazol-5-yl)phosphinate (50)**

The title compound was prepared from **41** and isolated as a white solid (39 mg, 49%). mp 95-7 °C. <sup>1</sup>H NMR (500 MHz, DMSO-*d*<sub>6</sub>) δ 9.02 (dd, *J* = 4.8, 1.6 Hz, 1H), 8.66 (dd, *J* = 8.0, 1.6 Hz, 1H), 8.26 (dd, *J* = 11.6, 1.3 Hz, 1H), 8.06 (dd, *J* = 8.4, 2.3 Hz, 1H), 8.01 (dd, *J* = 8.0, 4.7 Hz, 1H), 7.89 (ddd, *J* = 10.7, 8.3, 1.4 Hz, 1H), 3.54 (d, *J* = 10.9 Hz, 3H), 2.09 – 1.97 (m, 2H), 0.98 (dt, *J* = 19.0, 7.6 Hz, 3H). <sup>13</sup>C NMR (125.5 MHz, DMSO-*d*<sub>6</sub>) δ 159.8, 152.9 (d, *J* = 2.9 Hz), 151.7, 144.2 (q, *J* = 34.3 Hz), 141.3, 141.1, 129.8 (d, *J* = 11.3 Hz), 127.6, 127.5 (d, *J* = 120.3 Hz), 124.2 (d, *J* = 11.3 Hz), 122.0, 121.2 (q, *J* = 275.1 Hz), 112.0 (d, *J* = 13.4 Hz), 50.9 (d, *J* = 6.6 Hz), 21.1 (d, *J* = 101.9 Hz), 5.8 (d, *J* = 4.7 Hz). <sup>31</sup>P NMR {H} (162 MHz, DMSO-*d*<sub>6</sub>) δ 46.6. <sup>19</sup>F NMR (376 MHz, DMSO-*d*<sub>6</sub>) δ -63.0. LC-MS (215 nm, 100%) R<sub>T</sub> 1.05 min, MS (ESI):

mass calculated for  $C_{16}H_{14}F_3N_2O_3P$ , 370.07;  $m/z$  found 370.95  $[M + H]^+$ . HRMS (ESI):  $m/z$  calculated for  $C_{16}H_{14}N_2O_3P + H^+$   $[M + H]^+$ : 371.0767. Found: 371.0768.

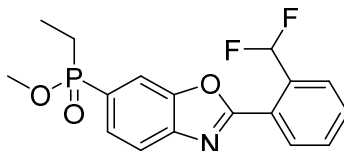

**Methyl (2-(2-(difluoromethyl)phenyl)benzo[d]oxazol-6-yl)(ethyl)phosphinate (51)**

The title compound was prepared from **42** and isolated as a white gum (73 mg, 41%).  $^1H$  NMR (500 MHz,  $DMSO-d_6$ )  $\delta$  8.31 (dd,  $J = 6.6, 2.5$  Hz, 1H), 8.22 – 8.15 (m, 1H), 8.06 (dd,  $J = 8.1, 2.6$  Hz, 1H), 7.97 – 7.93 (m, 1H), 7.92 (t,  $J = 54.7$  Hz, 1H), 7.86 – 7.82 (m, 2H), 7.80 (ddd,  $J = 10.7, 8.1, 1.2$  Hz, 1H), 3.54 (d,  $J = 10.9$  Hz, 3H), 2.06 – 1.95 (m, 2H), 0.98 (dt,  $J = 19.0, 7.7$  Hz, 3H).  $^{13}C$  NMR (125.5 MHz,  $DMSO-d_6$ )  $\delta$  162.8, 150.4 (d,  $J = 19.1$  Hz), 144.9, 133.7 (t,  $J = 22.5$  Hz), 133.1, 132.1, 130.6, 128.7 (t,  $J = 10.7$  Hz), 127.8, 126.8 (t,  $J = 7.1$  Hz), 124.9 (t,  $J = 5.4$  Hz), 121.2 (d,  $J = 13.5$  Hz), 115.0 (d,  $J = 11.6$  Hz), 112.7 (t,  $J = 236.0$  Hz), 51.4 (d,  $J = 6.2$  Hz), 21.6 (d,  $J = 102.0$  Hz), 6.2 (d,  $J = 4.7$  Hz).  $^{31}P$  NMR {H} (162 MHz,  $DMSO-d_6$ )  $\delta$  46.7.  $^{19}F$  NMR (376 MHz,  $DMSO-d_6$ )  $\delta$  -111.8 (d,  $J = 54.5$  Hz). LC-MS (254 nm, 100%)  $R_T$  3.17 min, MS (ESI): mass calculated for  $C_{17}H_{16}F_2NO_3P$ , 351.1;  $m/z$  found 352.1  $[M + H]^+$ . HRMS (ESI):  $m/z$  calculated for  $C_{17}H_{16}F_2NO_3P + H^+$   $[M + H]^+$ : 352.09086. Found: 352.09100.

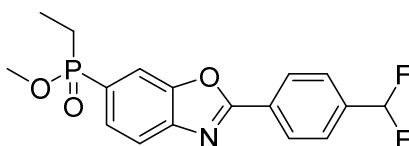

**Methyl (2-(4-(difluoromethyl)phenyl)benzo[d]oxazol-6-yl)(ethyl)phosphinate (52)**

The title compound was prepared from **43** and isolated as a white solid (73 mg, 64%). mp 81–2 °C.  $^1H$  NMR (500 MHz,  $DMSO-d_6$ )  $\delta$  8.42 – 8.33 (m, 2H), 8.16 (dt,  $J = 11.7, 1.0$  Hz, 1H), 8.02 (ddd,  $J = 8.1, 2.7, 0.6$  Hz, 1H), 7.85 (d,  $J = 8.3$  Hz, 2H), 7.79 (ddd,  $J = 10.8, 8.1, 1.3$  Hz, 1H), 7.19 (t,  $J = 55.6$  Hz, 1H), 3.54 (d,  $J = 11.0$  Hz, 3H), 2.08 – 1.94 (m, 2H), 0.98 (dt,  $J = 19.0, 7.6$  Hz, 3H).  $^{13}C$  NMR (125.5 MHz,  $DMSO-d_6$ )  $\delta$  163.5, 150.2 (d,  $J = 19.1$  Hz), 144.6, 137.5 (t,  $J = 22.4$  Hz), 128.3, 128.2, 127.6 (d,  $J = 120.2$  Hz), 126.8 (t,  $J = 6.2$  Hz), 120.5 (d,  $J = 13.6$  Hz), 114.5 (d,  $J = 11.6$  Hz), 114.3 (t,  $J = 236.9$  Hz), 50.9 (d,  $J = 6.6$  Hz), 21.2 (d,  $J = 102.0$  Hz), 5.8 (d,  $J = 4.8$  Hz).  $^{31}P$  NMR {H} (162 MHz,  $DMSO-d_6$ )  $\delta$  46.7.  $^{19}F$  NMR (376 MHz,  $DMSO-d_6$ )  $\delta$  -111.2 (d,  $J = 55.7$  Hz). LC-MS (254 nm, 100%)  $R_T$  3.03 min, MS (ESI): mass calculated for  $C_{17}H_{16}F_2NO_3P$ , 351.1;  $m/z$  found 352.1  $[M + H]^+$ . HRMS (ESI):  $m/z$  calculated for  $C_{17}H_{16}F_2NO_3P + H^+$   $[M + H]^+$ : 352.09086. Found: 352.09054.

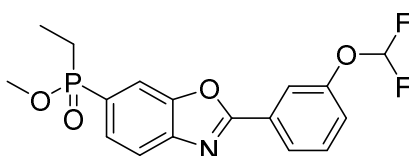

**Methyl (2-(3-(difluoromethoxy)phenyl)benzo[d]oxazol-6-yl)(ethyl)phosphinate (53)**

The title compound was prepared from **44** and isolated as a yellow oil (59 mg, 0.16 mmol, 48%).  $^1H$  NMR (500 MHz,  $DMSO-d_6$ )  $\delta$  8.16 (ddd,  $J = 11.6, 1.3, 0.7$  Hz, 1H), 8.12 (ddd,  $J = 7.8, 1.6, 1.0$  Hz, 1H), 8.01 (ddd,  $J = 8.1, 2.6, 0.7$  Hz, 1H), 7.99 – 7.95 (m, 1H), 7.79 (ddd,  $J = 10.8, 8.1, 1.3$  Hz, 1H), 7.72 (t,  $J = 8.0$  Hz, 1H), 7.51 (ddd,  $J = 8.2, 2.6, 0.9$  Hz, 1H), 7.43 (t,  $J = 73.5$  Hz, 1H), 3.54 (d,  $J = 11.0$  Hz, 3H), 2.14 – 1.91 (m, 2H), 0.98 (dt,  $J = 19.0, 7.7$  Hz, 3H).  $^{13}C$  NMR (125.5 MHz,  $DMSO-d_6$ )  $\delta$  163.3, 151.4 (t,  $J = 3.3$  Hz), 150.1 (d,  $J = 19.2$  Hz), 144.5 (d,  $J = 2.6$  Hz), 131.5, 128.2 (d,  $J = 10.4$  Hz), 127.7, 127.6 (d,  $J = 120.6$  Hz), 124.4, 123.0, 120.5 (d,  $J = 13.6$  Hz), 117.3, 116.2 (t,  $J = 258.9$  Hz), 114.5 (d,  $J = 11.7$  Hz), 50.9 (d,  $J = 6.6$

Hz), 21.2 (d,  $J = 101.8$  Hz), 5.78 (d,  $J = 4.7$  Hz).  $^{31}\text{P}$  NMR {H} (162 MHz, DMSO- $d_6$ )  $\delta$  46.7.  $^{19}\text{F}$  NMR (376 MHz, DMSO- $d_6$ )  $\delta$  -82.6 (d,  $J = 73.6$  Hz). LC-MS (215 nm, 100%)  $R_T$  4.13 min, MS (ESI): mass calculated for  $\text{C}_{17}\text{H}_{16}\text{F}_2\text{NO}_4\text{P}$ , 367.08;  $m/z$  found 367.85 [M + H] $^+$ . HRMS (ESI):  $m/z$  calculated for  $\text{C}_{17}\text{H}_{16}\text{F}_2\text{NO}_4\text{P} + \text{H}^+$  [M + H] $^+$ : 368.08578. Found: 368.08655.

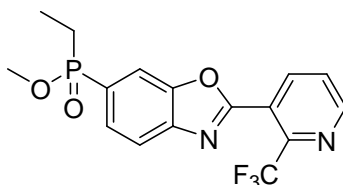

**Methyl ethyl(2-(2-(trifluoromethyl)pyridin-3-yl)benzo[d]oxazol-6-yl)phosphinate (54)**

The title compound was prepared from **45** and isolated as a white solid (42 mg, 46%). mp 82-3 °C.  $^1\text{H}$  NMR (500 MHz, DMSO- $d_6$ )  $\delta$  9.02 (dd,  $J = 4.8, 1.6$  Hz, 1H), 8.66 (dd,  $J = 8.0, 1.6$  Hz, 1H), 8.21 (d,  $J = 11.6$  Hz, 1H), 8.10 (dd,  $J = 8.1, 2.6$  Hz, 1H), 8.02 (dd,  $J = 8.0, 4.7$  Hz, 1H), 7.84 (ddd,  $J = 10.7, 8.1, 1.3$  Hz, 1H), 3.54 (d,  $J = 10.9$  Hz, 3H), 2.11 – 1.95 (m, 2H), 0.98 (dt,  $J = 19.1, 7.7$  Hz, 3H).  $^{13}\text{C}$  NMR (125.5 MHz, DMSO- $d_6$ )  $\delta$  160.6, 151.8, 150.8 (d,  $J = 19.1$  Hz), 144.2 (q,  $J = 34.1$  Hz), 144.0 (d,  $J = 2.2$  Hz), 141.1, 128.5 (d,  $J = 119.4$  Hz), 128.4 (d,  $J = 10.3$  Hz), 127.6, 122.0, 121.2 (q,  $J = 274.1$  Hz), 121.0 (d,  $J = 13.5$  Hz), 114.7 (d,  $J = 11.6$  Hz), 50.9 (d,  $J = 6.7$  Hz), 21.1 (d,  $J = 102.0$  Hz), 5.8 (d,  $J = 4.7$  Hz).  $^{31}\text{P}$  NMR {H} (162 MHz, DMSO- $d_6$ )  $\delta$  46.5.  $^{19}\text{F}$  NMR (376 MHz, DMSO- $d_6$ )  $\delta$  -63.0. LCMS (215 nm, 96%)  $R_T$  1.04 min, MS (ESI): mass calculated for  $\text{C}_{16}\text{H}_{14}\text{F}_3\text{N}_2\text{O}_3\text{P}$ , 370.07;  $m/z$  found 370.90 [M + H] $^+$ . HRMS (ESI):  $m/z$  calculated for  $\text{C}_{16}\text{H}_{14}\text{F}_3\text{N}_2\text{O}_3\text{P} + \text{H}^+$  [M + H] $^+$ : 371.0767. Found: 371.0770.

**General procedure 3: Insertion of aryl and heteroaryl substituents via C-H activation (16, 19-27)**

To a solution of methyl benzo[d]oxazolyl(ethyl)phosphinate (1 eq) and  $\text{Cs}_2\text{CO}_3$  (2 eq) in anhydrous dioxane (0.15 M) under nitrogen  $\text{Pd}(\text{PPh}_3)_2\text{Cl}_2$  (0.1 eq) and  $\text{CuI}$  (0.05 eq) were added. The reaction was stirred at RT for 5 min, before the addition of bromoaryl (1 eq) followed by heating at 100 °C for 12 h. The reaction was then diluted with water, extracted with  $\text{CH}_2\text{Cl}_2$ , dried over anhydrous  $\text{Na}_2\text{SO}_4$ , and the solvents were evaporated *in vacuo*. The residue was purified by HPLC (acidic method), unless otherwise stated, to afford the title compounds.

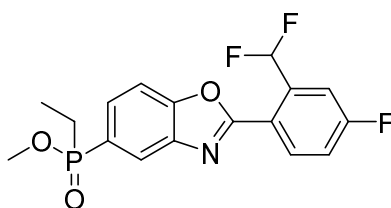

**Methyl (2-(2-(difluoromethyl)-4-fluorophenyl)benzo[d]oxazol-5-yl)(ethyl)phosphinate (16)**

The title compound was prepared from **12** and 1-bromo-2-(difluoromethyl)-4-fluorobenzene and isolated as a white solid (27 mg, 16%). mp 102-3 °C.  $^1\text{H}$  NMR (500 MHz, DMSO- $d_6$ )  $\delta$  8.37 (dd,  $J = 8.8, 5.4$  Hz, 1H), 8.21 (dt,  $J = 11.5, 1.0$  Hz, 1H), 8.04 – 8.00 (m, 1H), 7.88 (td,  $J = 54.9, 0.9$  Hz, 1H), 7.85 (ddd,  $J = 10.7, 8.3, 1.4$  Hz, 1H), 7.78 (dd,  $J = 9.4, 2.6$  Hz, 1H), 7.70 (td,  $J = 8.4, 2.7$  Hz, 1H), 3.53 (d,  $J = 10.9$  Hz, 3H), 2.07 – 1.97 (m, 2H), 0.97 (dt,  $J = 18.9, 7.6$  Hz, 3H).  $^{13}\text{C}$  NMR (125.5 MHz, DMSO- $d_6$ )  $\delta$  164.0 (d,  $J = 252.7$  Hz), 160.7, 152.4, 141.5 (d,  $J = 17.1$  Hz), 136.0 (td,  $J = 23.0, 7.8$  Hz), 133.2 (d,  $J = 9.4$  Hz), 129.4 (d,  $J = 10.8$  Hz), 127.6, 126.7, 123.8 (d,  $J = 11.4$  Hz), 121.1 (q,  $J = 5.3$  Hz), 118.9 (d,  $J = 21.9$  Hz), 113.9 (dt,  $J = 24.8, 7.5$  Hz), 111.9 (d,  $J = 13.6$  Hz), 111.5 (t,  $J = 237.3$  Hz), 50.8 (d,  $J = 6.4$  Hz), 21.1 (d,  $J = 101.3$  Hz), 5.8 (d,  $J = 4.7$  Hz).  $^{31}\text{P}$  NMR {H} (162 MHz, DMSO- $d_6$ )  $\delta$  46.7.  $^{19}\text{F}$  NMR (376 MHz, DMSO-



$d_6$ )  $\delta$  -105.5 (dd,  $J = 8.4, 6.1$  Hz, 1F), -112.4 (d,  $J = 54.6$  Hz, 2F). LC-MS (254 nm, 100%)  $R_T$  3.26 min, MS (ESI): mass calculated for  $C_{17}H_{15}F_3NO_3P$ , 369.1;  $m/z$  found 370.1  $[M + H]^+$ . HRMS (ESI):  $m/z$  calculated for  $C_{17}H_{15}F_3NO_3P + H^+$   $[M + H]^+$ : 370.08144. Found: 370.08074.

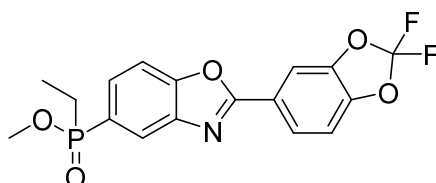

**Methyl (2-(2,2-difluorobenzo[d][1,3]dioxol-5-yl)benzo[d]oxazol-5-yl)(ethyl)phosphinate (19)**

The title compound was prepared from **12** and 5-bromo-2,2-difluorobenzo[d][1,3]dioxole and isolated as an off-white solid (17 mg, 8%). mp 103 °C.  $^1H$  NMR (500 MHz,  $DMSO-d_6$ )  $\delta$  8.21 (d,  $J = 1.7$  Hz, 1H), 8.14 (dd,  $J = 11.7, 0.5$  Hz, 2H), 8.13 (dd,  $J = 8.5, 1.7$  Hz, 1H), 7.98 (dd,  $J = 8.2, 2.3$  Hz, 1H), 7.81 (ddd,  $J = 10.7, 8.3, 1.4$  Hz, 1H), 7.69 (d,  $J = 8.5$  Hz, 1H), 3.53 (d,  $J = 10.9$  Hz, 3H), 2.07 – 1.93 (m, 2H), 0.97 (dt,  $J = 18.9, 7.6$  Hz, 3H).  $^{13}C$  NMR (12.5 MHz,  $DMSO-d_6$ )  $\delta$  162.4, 152.7, 145.5, 143.5, 141.7 (d,  $J = 17.1$  Hz), 131.3 (t,  $J = 254.7$  Hz), 129.1 (d,  $J = 11.3$  Hz), 127.1 (d,  $J = 121.1$  Hz), 125.1, 123.5 (d,  $J = 10.9$  Hz), 122.7, 111.7 (d,  $J = 13.5$  Hz), 111.2, 109.3, 50.8 (d,  $J = 6.6$  Hz), 21.2 (d,  $J = 101.8$  Hz), 5.8 (d,  $J = 4.7$  Hz).  $^{31}P$  NMR {H} (162 MHz,  $DMSO-d_6$ )  $\delta$  46.8.  $^{19}F$  NMR (376 MHz,  $DMSO-d_6$ )  $\delta$  -48.9. LC-MS (215 nm, 98%)  $R_T$  3.43 min, MS (ESI): mass calculated for  $C_{17}H_{14}F_2NO_5P$ , 381.1;  $m/z$  found 382.1  $[M + H]^+$ . HRMS (ESI):  $m/z$  calculated for  $C_{17}H_{14}F_2NO_5P + H^+$   $[M + H]^+$ : 382.0650. Found: 382.0646.

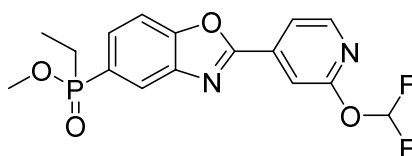

**Methyl (2-(2-(difluoromethoxy)pyridin-4-yl)benzo[d]oxazol-5-yl)(ethyl)phosphinate (20)**

The title compound was prepared from **12** and 4-bromo-2-(difluoromethoxy)pyridine and isolated as a white gum (63 mg, 31%).  $^1H$  NMR (500 MHz,  $CDCl_3$ )  $\delta$  8.55 (d,  $J = 5.2$  Hz, 1H), 8.24 (dd,  $J = 11.6, 1.3$  Hz, 1H), 8.04 (dd,  $J = 8.4, 2.3$  Hz, 1H), 8.00 (dd,  $J = 5.3, 1.4$  Hz, 1H), 7.88 (ddd,  $J = 10.0, 8.4, 1.4$  Hz, 1H), 7.80 (t,  $J = 72.4$  Hz, 1H), 7.77 – 7.71 (m, 1H), 3.54 (d,  $J = 10.9$  Hz, 3H), 2.07 – 1.96 (m, 2H), 0.98 (dt,  $J = 19.0, 7.7$  Hz, 3H).  $^{13}C$  NMR (125.5 MHz,  $CDCl_3$ )  $\delta$  161.1, 160.1 (t,  $J = 3.8$  Hz), 153.4 (d,  $J = 2.9$  Hz), 148.4, 142.1 (d,  $J = 17.1$  Hz), 138.0, 130.3 (d,  $J = 11.3$  Hz), 127.6 (d,  $J = 122.0$  Hz), 125.2 (d,  $J = 10.7$  Hz), 117.8, 114.1 (t,  $J = 256.4$  Hz), 111.9 (d,  $J = 13.4$  Hz), 109.6, 51.4 (d,  $J = 6.5$  Hz), 22.9 (d,  $J = 103.1$  Hz), 6.1 (d,  $J = 4.9$  Hz).  $^{31}P$  NMR {H} (162 MHz,  $CDCl_3$ )  $\delta$  47.3.  $^{19}F$  NMR (376 MHz,  $CDCl_3$ )  $\delta$  -89.1 (d,  $J = 72.3$  Hz). LC-MS (215 nm, 97%)  $R_T$  3.02 min, MS (ESI): mass calculated for  $C_{16}H_{15}F_2N_2O_4P$ , 368.1;  $m/z$  found 369.1  $[M + H]^+$ . HRMS (ESI):  $m/z$  calculated for  $C_{16}H_{15}N_2O_4P + H^+$   $[M + H]^+$ : 369.0810. Found: 369.0816.

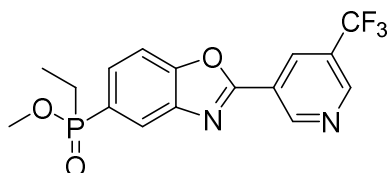

**Methyl ethyl(2-(5-(trifluoromethyl)pyridin-3-yl)benzo[d]oxazol-5-yl)phosphinate (21)**

The title compound was prepared from **12** and 3-bromo-5-(trifluoromethyl)pyridine. Purification with HPLC (basic method) derived the desired product as an off-white solid (66 mg, 40%). mp 134-5 °C.  $^1H$  NMR (500 MHz,  $DMSO-d_6$ )  $\delta$  9.65 (d,  $J = 2.0$  Hz, 1H), 9.28 (dd,  $J = 2.1, 1.0$  Hz, 1H), 8.84 (t,  $J = 2.3$  Hz, 1H), 8.20 (dt,  $J = 11.6, 0.9$  Hz, 1H), 8.07 (dd,  $J = 8.1, 2.5$  Hz, 1H),

7.83 (ddd,  $J = 10.7, 8.1, 1.3$  Hz, 1H), 3.55 (d,  $J = 10.9$  Hz, 3H), 2.11 – 1.94 (m, 2H), 0.98 (dt,  $J = 19.1, 7.7$  Hz, 3H).  $^{13}\text{C}$  NMR (125.5 MHz, DMSO- $d_6$ )  $\delta$  161.2, 152.0, 150.3 (d,  $J = 19.1$  Hz), 149.2 (q,  $J = 3.6$  Hz), 144.2, 132.2 (q,  $J = 3.7$  Hz), 128.4 (d,  $J = 10.5$  Hz), 128.3 (d,  $J = 120.1$  Hz), 125.7 (q,  $J = 33.3$  Hz), 123.2 (q,  $J = 272.8$  Hz), 123.0, 120.8 (d,  $J = 13.5$  Hz), 114.7 (d,  $J = 11.6$  Hz), 50.9 (d,  $J = 6.7$  Hz), 21.2 (d,  $J = 101.4$  Hz), 5.8 (d,  $J = 4.8$  Hz).  $^{31}\text{P}$  NMR {H} (162 MHz, DMSO- $d_6$ )  $\delta$  46.5.  $^{19}\text{F}$  NMR (376 MHz, DMSO- $d_6$ )  $\delta$  -61.1. LC-MS (215 nm, 95%)  $R_T$  1.07 min, MS (ESI): mass calcd for  $\text{C}_{16}\text{H}_{14}\text{F}_3\text{N}_2\text{O}_3\text{P}$ , 370.07;  $m/z$  found 370.90 [M + H] $^+$ . HRMS (ESI):  $m/z$  calculated for  $\text{C}_{16}\text{H}_{14}\text{F}_3\text{N}_2\text{O}_3\text{P} + \text{H}^+$  [M + H] $^+$ : 371.0767. Found: 371.0768.

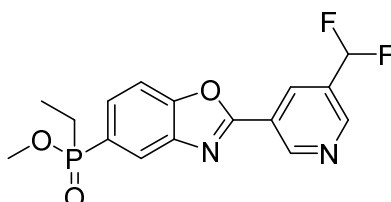

**Methyl (2-(5-(difluoromethyl)pyridin-3-yl)benzo[d]oxazol-5-yl)(ethyl)phosphinate (22)**

The title compound was prepared from **12** and 3-bromo-5-(difluoromethyl)pyridine and isolated as a pale brown solid (156 mg, 28%). mp 99-101 °C.  $^1\text{H}$  NMR (500 MHz, DMSO- $d_6$ )  $\delta$  9.52 (d,  $J = 2.0$  Hz, 1H), 9.10 – 9.01 (m, 1H), 8.73 (d,  $J = 2.3$  Hz, 1H), 8.21 (dd,  $J = 11.6, 1.4$  Hz, 1H), 8.04 (dd,  $J = 8.4, 2.3$  Hz, 1H), 7.85 (ddd,  $J = 10.7, 8.4, 1.4$  Hz, 1H), 7.33 (t,  $J = 55.0$  Hz, 1H), 3.54 (d,  $J = 10.9$  Hz, 3H), 2.10 – 1.95 (m, 2H), 0.98 (dt,  $J = 19.0, 7.6$  Hz, 3H).  $^{13}\text{C}$  NMR (125.5 MHz, DMSO- $d_6$ )  $\delta$  160.9, 152.7, 150.4, 149.9 (t,  $J = 6.1$  Hz), 141.5 (d,  $J = 17.1$  Hz), 132.5 (t,  $J = 5.9$  Hz), 130.4 (t,  $J = 23.3$  Hz), 129.5 (d,  $J = 10.8$  Hz), 127.3 (d,  $J = 121.0$  Hz), 123.9 (d,  $J = 11.3$  Hz), 122.7, 113.4 (t,  $J = 237.3$  Hz), 112.0 (d,  $J = 13.5$  Hz), 50.9 (d,  $J = 6.6$  Hz), 21.2 (d,  $J = 101.3$  Hz), 5.8 (d,  $J = 4.7$  Hz).  $^{31}\text{P}$  NMR {H} (162 MHz, DMSO- $d_6$ )  $\delta$  46.7.  $^{19}\text{F}$  NMR (376 MHz, DMSO- $d_6$ )  $\delta$  -112.3 (d,  $J = 54.9$  Hz). LC-MS (254 nm, 100%)  $R_T$  2.49 min, MS (ESI): mass calculated for  $\text{C}_{16}\text{H}_{15}\text{F}_2\text{N}_2\text{O}_3\text{P}$ , 352.1;  $m/z$  found 353.1 [M + H] $^+$ . HRMS (ESI):  $m/z$  calculated for  $\text{C}_{16}\text{H}_{15}\text{F}_2\text{N}_2\text{O}_3\text{P} + \text{H}^+$  [M + H] $^+$ : 353.0861. Found: 353.0862.

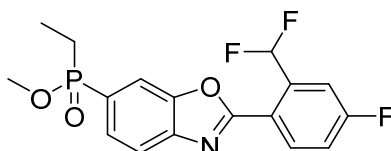

**Methyl (2-(2-(difluoromethyl)-4-fluorophenyl)benzo[d]oxazol-6-yl)(ethyl)phosphinate (23)**

The title compound was prepared from **13** and 1-bromo-2-(difluoromethyl)-4-fluorobenzene and isolated as a white solid (66 mg, 39%). mp 132-4 °C.  $^1\text{H}$  NMR (500 MHz, DMSO- $d_6$ )  $\delta$  8.38 (dd,  $J = 8.8, 5.4$  Hz, 1H), 8.18 (d,  $J = 11.6$  Hz, 1H), 8.05 (dd,  $J = 8.1, 2.6$  Hz, 1H), 7.94 (t,  $J = 54.8$  Hz, 1H), 7.84 – 7.75 (m, 2H), 7.71 (td,  $J = 8.4, 2.7$  Hz, 1H), 3.54 (d,  $J = 10.9$  Hz, 3H), 2.07 – 1.96 (m, 2H), 0.98 (dt,  $J = 19.0, 7.7$  Hz, 3H).  $^{13}\text{C}$  NMR (125.5 MHz, DMSO- $d_6$ )  $\delta$  164.5 (d,  $J = 252.7$  Hz), 162.0, 150.4 (d,  $J = 19.1$  Hz), 144.8, 136.6 (td,  $J = 23.1, 8.6$  Hz), 133.7 (d,  $J = 9.4$  Hz), 128.7 (d,  $J = 10.4$  Hz), 128.3 (d,  $J = 120.2$  Hz), 121.6 (d,  $J = 4.5$  Hz), 121.2 (d,  $J = 13.4$  Hz), 119.4 (d,  $J = 22.0$  Hz), 115.0 (d,  $J = 11.8$  Hz), 114.4 (dt,  $J = 24.5, 7.4$  Hz), 112.0 (t,  $J = 237.1$  Hz), 51.4 (d,  $J = 6.5$  Hz), 21.6 (d,  $J = 102.0$  Hz), 6.2 (d,  $J = 4.7$  Hz).  $^{31}\text{P}$  NMR {H} (162 MHz, DMSO- $d_6$ )  $\delta$  46.7.  $^{19}\text{F}$  NMR (376 MHz, DMSO- $d_6$ )  $\delta$  -105.3 (dd  $J = 14.5, 8.4$  Hz, 1F), -112.4 (d,  $J = 54.5$  Hz, 2F). LC-MS (254 nm, 100%)  $R_T$  3.29 min, MS (ESI): mass calculated for  $\text{C}_{17}\text{H}_{15}\text{F}_3\text{NO}_3\text{P}$ , 369.1;  $m/z$  found 370.1 [M + H] $^+$ . HRMS (ESI):  $m/z$  calculated for  $\text{C}_{17}\text{H}_{15}\text{F}_3\text{NO}_3\text{P} + \text{H}^+$  [M + H] $^+$ : 370.08144. Found: 370.08112.

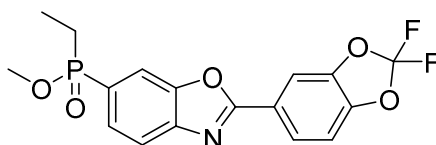

**Methyl (2-(2,2-difluorobenzo[d][1,3]dioxol-5-yl)benzo[d]oxazol-6-yl)(ethyl)phosphinate (24)**

The title compound was prepared from **13** and 5-bromo-2,2-difluorobenzo[d][1,3]dioxole and isolated as a white gum (14 mg, 7%). <sup>1</sup>H NMR (500 MHz, CDCl<sub>3</sub>) δ 8.10 (dd, *J* = 8.4, 1.7 Hz, 1H), 8.07 (dt, *J* = 11.7, 0.9 Hz, 1H), 7.99 (d, *J* = 1.6 Hz, 1H), 7.86 (ddd, *J* = 8.0, 2.7, 0.6 Hz, 1H), 7.73 (ddd, *J* = 10.8, 8.1, 1.2 Hz, 1H), 7.24 (d, *J* = 8.4 Hz, 1H), 3.67 (d, *J* = 11.0 Hz, 3H), 2.08 – 1.86 (m, 2H), 1.14 (dt, *J* = 19.1, 7.7 Hz, 3H). <sup>13</sup>C NMR (125.5 MHz, CDCl<sub>3</sub>) δ 163.9, 150.9 (d, *J* = 19.1 Hz), 146.7, 145.5 (d, *J* = 2.8 Hz), 144.5, 131.9 (t, *J* = 257.5 Hz), 128.2 (d, *J* = 10.5 Hz), 127.2 (d, *J* = 122.0 Hz), 124.7, 123.0, 120.7 (d, *J* = 13.5 Hz), 115.0 (d, *J* = 11.4 Hz), 110.2, 109.3, 51.4 (d, *J* = 6.7 Hz), 22.9 (d, *J* = 103.8 Hz), 6.1 (d, *J* = 4.8 Hz). <sup>31</sup>P NMR {H} (162 MHz, CDCl<sub>3</sub>) δ 47.5. <sup>19</sup>F NMR (376 MHz, CDCl<sub>3</sub>) δ -49.8. LC-MS (215 nm, 100%) R<sub>T</sub> 3.41 min, MS (ESI): mass calculated for C<sub>17</sub>H<sub>14</sub>F<sub>2</sub>NO<sub>5</sub>P, 381.1; *m/z* found 382.1 [M + H]<sup>+</sup>. HRMS (ESI): *m/z* calculated for C<sub>17</sub>H<sub>14</sub>NO<sub>5</sub>P + H<sup>+</sup> [M + H]<sup>+</sup>: 382.0650. Found: 382.0649.

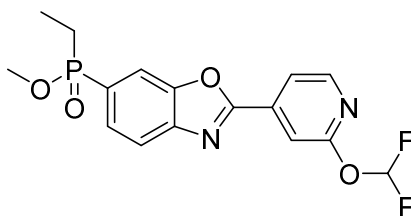

**Methyl (2-(2-(difluoromethoxy)pyridin-4-yl)benzo[d]oxazol-6-yl)(ethyl)phosphinate (25)**

The title compound was prepared from **13** and 4-bromo-2-(difluoromethoxy)pyridine and isolated as a white sticky solid (65 mg, 33%). mp 46-47 °C. <sup>1</sup>H NMR (500 MHz, DMSO-*d*<sub>6</sub>) δ 8.56 (dd, *J* = 5.2, 0.8 Hz, 1H), 8.20 (dt, *J* = 11.5, 0.9 Hz, 1H), 8.08 (dd, *J* = 8.1, 2.5 Hz, 1H), 8.01 (dd, *J* = 5.2, 1.4 Hz, 1H), 7.83 (ddd, *J* = 10.7, 8.1, 1.3 Hz, 1H), 7.81 (t, *J* = 72.4 Hz, 1H), 7.75 (t, *J* = 1.0 Hz, 1H), 3.54 (d, *J* = 11.0 Hz, 3H), 2.11 – 1.92 (m, 2H), 0.98 (dt, *J* = 19.0, 7.7 Hz, 3H). <sup>13</sup>C NMR (125.5 MHz, DMSO-*d*<sub>6</sub>) δ 161.4 (d, *J* = 1.4 Hz), 159.2 (t, *J* = 3.8 Hz), 150.3 (d, *J* = 19.6 Hz), 149.0, 144.1, 137.6, 128.7 (d, *J* = 120.0 Hz), 128.5 (d, *J* = 10.4 Hz), 121.1 (d, *J* = 13.6 Hz), 118.2, 114.9 (d, *J* = 11.6 Hz), 114.8 (t, *J* = 255.7 Hz), 108.9, 50.9 (d, *J* = 6.6 Hz), 21.1 (d, *J* = 101.4 Hz), 5.7 (d, *J* = 4.7 Hz). <sup>31</sup>P NMR {H} (162 MHz, DMSO-*d*<sub>6</sub>) δ 46.5. <sup>19</sup>F NMR (376 MHz, DMSO-*d*<sub>6</sub>) δ -87.5 (d, *J* = 72.2 Hz). LC-MS (215 nm, 99%) R<sub>T</sub> 3.01 min, MS (ESI): mass calculated for C<sub>16</sub>H<sub>15</sub>F<sub>2</sub>N<sub>2</sub>O<sub>4</sub>P, 368.1; *m/z* found 369.1 [M + H]<sup>+</sup>. HRMS (ESI): *m/z* calculated for C<sub>16</sub>H<sub>15</sub>N<sub>2</sub>O<sub>4</sub>P + H<sup>+</sup> [M + H]<sup>+</sup>: 369.0810. Found: 369.0811.

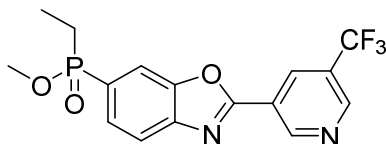

**Methyl ethyl(2-(5-(trifluoromethyl)pyridin-3-yl)benzo[d]oxazol-6-yl)phosphinate (26)**

The title compound was prepared from **13** and 3-bromo-5-(trifluoromethyl)pyridine. Purification with HPLC (basic method) derived the desired product as an off-white solid (61 mg, 37%). mp 134-5 °C. <sup>1</sup>H NMR (500 MHz, DMSO-*d*<sub>6</sub>) δ 9.64 (d, *J* = 2.0 Hz, 1H), 9.27 (dd, *J* = 2.3, 1.0 Hz, 1H), 8.84 (dt, *J* = 2.6, 1.3 Hz, 1H), 8.23 (dt, *J* = 11.7, 1.0 Hz, 1H), 8.05 (dd, *J* = 8.3, 2.2 Hz, 1H), 7.87 (ddd, *J* = 10.7, 8.3, 1.4 Hz, 1H), 3.54 (d, *J* = 10.9 Hz, 3H), 2.10 – 1.93 (m, 2H), 0.98 (dt, *J* = 19.0, 7.7 Hz, 3H). <sup>13</sup>C NMR (125.5 MHz, DMSO-*d*<sub>6</sub>) δ 160.9, 153.2, 152.3, 149.6 (d, *J* = 4.1 Hz), 141.9 (d, *J* = 16.5 Hz), 132.6 (q, *J* = 2.9 Hz), 130.1 (d, *J* = 11.3 Hz), 127.9 (d, *J* = 120.4 Hz), 126.2 (q, *J* = 33.1 Hz), 124.4 (d, *J* = 11.1 Hz), 123.7 (q, *J* = 272.9 Hz), 123.4, 112.5 (d, *J* = 13.7 Hz), 51.3 (d, *J* = 6.6 Hz), 21.6 (d, *J* = 101.9 Hz), 6.3. <sup>31</sup>P NMR {H} (162 MHz,

DMSO-*d*<sub>6</sub>)  $\delta$  46.6. <sup>19</sup>F NMR (376 MHz, DMSO-*d*<sub>6</sub>)  $\delta$  -61.1. LC-MS (215 nm, 100%) R<sub>T</sub> 1.08 min, MS (ESI): mass calcd for C<sub>16</sub>H<sub>14</sub>F<sub>3</sub>N<sub>2</sub>O<sub>3</sub>P, 370.07; *m/z* found 370.95 [M + H]<sup>+</sup>. HRMS (ESI): *m/z* calculated for C<sub>16</sub>H<sub>14</sub>F<sub>3</sub>N<sub>2</sub>O<sub>3</sub>P + H<sup>+</sup> [M + H]<sup>+</sup>: 371.0767. Found: 371.0770.

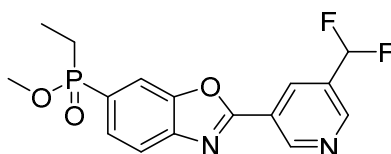

**Methyl (2-(5-(difluoromethyl)pyridin-3-yl)benzo[d]oxazol-6-yl)(ethyl)phosphinate (27)**

The title compound was prepared from **13** and 3-bromo-5-(difluoromethyl)pyridine and isolated as a yellow gum (11 mg, 7%). <sup>1</sup>H NMR (500 MHz, MeOH-*d*<sub>4</sub>)  $\delta$  9.53 (d, *J* = 2.0 Hz, 1H), 9.07 (d, *J* = 1.9 Hz, 1H), 8.73 (t, *J* = 1.9 Hz, 1H), 8.22 – 8.15 (m, 1H), 8.06 (dd, *J* = 8.1, 2.6 Hz, 1H), 7.82 (ddd, *J* = 10.8, 8.1, 1.3 Hz, 1H), 7.34 (t, *J* = 55.0 Hz, 1H), 3.55 (d, *J* = 11.0 Hz, 3H), 2.12 – 1.95 (m, 2H), 0.98 (dt, *J* = 19.0, 7.6 Hz, 3H). <sup>13</sup>C NMR (125.5 MHz, DMSO-*d*<sub>6</sub>)  $\delta$  162.2, 150.9, 150.7 (d, *J* = 19.2 Hz), 150.5 (t, *J* = 6.1 Hz), 144.8, 133.0 (t, *J* = 6.0 Hz), 130.8 (t, *J* = 23.5 Hz), 128.9 (d, *J* = 10.4 Hz), 128.5 (d, *J* = 120.1 Hz), 123.1, 121.2 (d, *J* = 13.4 Hz), 115.1 (d, *J* = 11.7 Hz), 113.9 (t, *J* = 237.0 Hz), 51.4 (d, *J* = 6.4 Hz), 21.6 (d, *J* = 101.6 Hz), 6.2 (d, *J* = 4.6 Hz). <sup>31</sup>P NMR {H} (162 MHz, DMSO-*d*<sub>6</sub>)  $\delta$  46.6. <sup>19</sup>F NMR (376 MHz, DMSO-*d*<sub>6</sub>)  $\delta$  -112.4 (d, *J* = 54.9 Hz). LC-MS (254 nm, 96%) R<sub>T</sub> 2.48 min, MS (ESI): mass calculated for C<sub>16</sub>H<sub>15</sub>F<sub>2</sub>N<sub>2</sub>O<sub>3</sub>P, 352.1; *m/z* found 353.1 [M + H]<sup>+</sup>. HRMS (ESI): *m/z* calculated for C<sub>16</sub>H<sub>15</sub>F<sub>2</sub>N<sub>2</sub>O<sub>3</sub>P + H<sup>+</sup> [M + H]<sup>+</sup>: 353.0861. Found: 353.0863.

**General procedure 4: Benzo[d]oxazole ring formation from o-aminophenols (28-36)**

A suspension of bromoaminophenol (1 eq) and benzoyl chloride (1.25 eq) in xylenes (0.15 M) was heated to 155 °C for 1 h. Methanesulfonic acid (0.2 eq) was added and the reaction mixture was refluxed at 155 °C for 2-3 h. The solvents were evaporated in vacuo and the residue was purified by flash column chromatography to afford the title compounds.

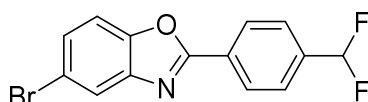

**5-Bromo-2-(4-(difluoromethyl)phenyl)benzo[d]oxazole (28)**

The title compound was prepared from 2-amino-4-bromophenol and 4-(difluoromethyl)benzoyl chloride followed by purification with flash column chromatography (gradient 0-50% EtOAc in hexane) to afford **28** as a pink solid (220 mg, 45%). <sup>1</sup>H NMR (500 MHz, DMSO-*d*<sub>6</sub>)  $\delta$  8.34 (d, *J* = 8.3 Hz, 2H), 8.10 (d, *J* = 1.8 Hz, 1H), 7.83 (d, *J* = 8.7 Hz, 2H), 7.64 (dd, *J* = 8.6, 2.0 Hz, 1H), 7.17 (t, *J* = 55.6 Hz, 1H). LC-MS (215 nm, 96%) R<sub>T</sub> 1.38 min, MS (ESI): mass calculated for C<sub>14</sub>H<sub>8</sub><sup>79</sup>BrF<sub>2</sub>NO, 322.98; *m/z* found 323.85 [M + H]<sup>+</sup>.

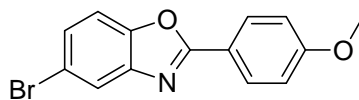

**5-Bromo-2-(4-methoxyphenyl)benzo[d]oxazole (29)**

The title compound was prepared from 2-amino-4-bromophenol and 4-methoxybenzoyl chloride followed by purification with flash column chromatography (gradient 0-40% EtOAc in heptane) to afford **29** as a pink solid (471 mg, 58%). <sup>1</sup>H NMR (500 MHz, DMSO-*d*<sub>6</sub>)  $\delta$  8.17 – 8.11 (m, 2H), 7.99 (d, *J* = 1.9 Hz, 1H), 7.75 (d, *J* = 8.6 Hz, 1H), 7.55 (dd, *J* = 8.6, 2.0 Hz, 1H), 7.21 – 7.13 (m, 2H), 3.87 (s, 3H). LC-MS (215 nm, 98%) R<sub>T</sub> 1.39 min, MS (ESI): mass calculated for C<sub>14</sub>H<sub>10</sub><sup>79</sup>BrNO<sub>2</sub>, 302.99; *m/z* found 303.75 [M + H]<sup>+</sup>.

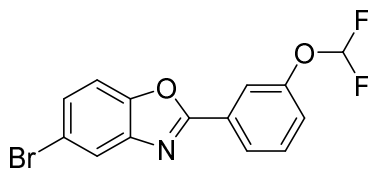

**5-Bromo-2-(3-(difluoromethoxy)phenyl)benzo[d]oxazole (30)**

The title compound was prepared from 2-amino-4-bromophenol and 3-(difluoromethoxy)benzoyl chloride followed by purification with flash column chromatography (gradient 0-100% EtOAc in heptane) to afford **30** as a pink solid (190 mg, 49%). <sup>1</sup>H NMR (500 MHz, DMSO-*d*<sub>6</sub>) δ 8.10 (d, *J* = 2.0 Hz, 1H), 8.08 (dt, *J* = 7.8, 1.3 Hz, 1H), 7.93 (t, *J* = 2.1 Hz, 1H), 7.82 (d, *J* = 8.7 Hz, 1H), 7.70 (t, *J* = 8.0 Hz, 1H), 7.63 (dd, *J* = 8.6, 2.0 Hz, 1H), 7.51 – 7.46 (m, 1H), 7.42 (t, *J* = 73.5 Hz, 1H). LC-MS (215 nm, 93%) R<sub>T</sub> 1.40 min, MS (ESI): mass calculated for C<sub>14</sub>H<sub>8</sub><sup>79</sup>BrF<sub>2</sub>NO<sub>2</sub>, 338.97; *m/z* found 339.75 [M + H]<sup>+</sup>.

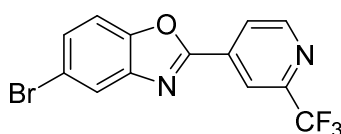

**5-Bromo-2-(2-(trifluoromethyl)pyridin-4-yl)benzo[d]oxazole (31)**

The title compound was prepared from 2-amino-4-bromophenol and 2-(trifluoromethyl)isonicotinoyl chloride followed by purification with flash column chromatography (gradient 0-50% EtOAc in heptane) to afford **31** as a pink solid (200 mg, 56%). <sup>1</sup>H NMR (500 MHz, DMSO-*d*<sub>6</sub>) δ 9.06 (d, *J* = 5.0 Hz, 1H), 8.46 (s, 1H), 8.42 (dd, *J* = 5.0, 1.2 Hz, 1H), 8.21 (d, *J* = 1.9 Hz, 1H), 7.90 (d, *J* = 8.7 Hz, 1H), 7.72 (dd, *J* = 8.7, 2.0 Hz, 1H). LC-MS (215 nm, 100%) R<sub>T</sub> 1.36 min, MS (ESI): mass calculated for C<sub>13</sub>H<sub>6</sub><sup>79</sup>BrF<sub>3</sub>N<sub>2</sub>O, 341.96; *m/z* found 342.75 [M + H]<sup>+</sup>.

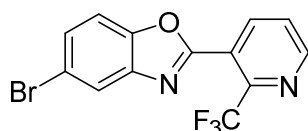

**5-Bromo-2-(2-(trifluoromethyl)pyridin-3-yl)benzo[d]oxazole (32)**

The title compound was prepared from 2-amino-4-bromophenol and 2-(trifluoromethyl)nicotinoyl chloride followed by purification with flash column chromatography (gradient 0-40% EtOAc in heptane) to afford **32** as a pink solid (498 mg, 66%). <sup>1</sup>H NMR (500 MHz, DMSO-*d*<sub>6</sub>) δ 9.01 (dd, *J* = 4.8, 1.6 Hz, 1H), 8.64 (dd, *J* = 8.0, 1.6 Hz, 1H), 8.20 (d, *J* = 1.9 Hz, 1H), 8.00 (dd, *J* = 7.9, 4.7 Hz, 1H), 7.88 (d, *J* = 8.7 Hz, 1H), 7.70 (dd, *J* = 8.7, 2.0 Hz, 1H). LC-MS (215 nm, 66%) R<sub>T</sub> 0.94 min, MS (ESI): mass calculated for C<sub>13</sub>H<sub>6</sub><sup>81</sup>BrF<sub>2</sub>N<sub>2</sub>O, 343.96; *m/z* found 344.80 [M + H]<sup>+</sup>.

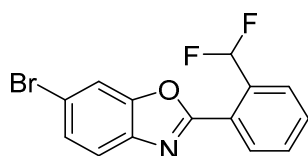

**6-Bromo-2-(2-(difluoromethyl)phenyl)benzo[d]oxazole (33)**

The title compound was prepared from 2-amino-5-bromophenol and 2-(difluoromethyl)benzoyl chloride followed by purification with flash column chromatography (gradient 0-100% EtOAc in hexane) to afford **33** as a pink solid (180 mg, 30%). <sup>1</sup>H NMR (500 MHz, DMSO-*d*<sub>6</sub>) δ 8.29 – 8.21 (m, 1H), 8.18 (d, *J* = 1.8 Hz, 1H), 7.95 – 7.91 (m, 1H), 7.90 (t, *J* = 54.8 Hz, 1H), 7.85 (d,

$J = 8.5$  Hz, 1H), 7.83 – 7.80 (m, 1H), 7.63 (dd,  $J = 8.5$ , 1.8 Hz, 1H). LC-MS (215 nm, 66%)  $R_T$  1.38 min, MS (ESI): mass calculated for  $C_{14}H_8^{81}BrF_2NO$ , 324.97;  $m/z$  found 325.85 [M + H]<sup>+</sup>.

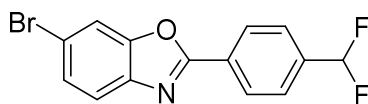

**6-Bromo-2-(4-(difluoromethyl)phenyl)benzo[d]oxazole (34)**

The title compound was prepared from 2-amino-5-bromophenol and 4-(difluoromethyl)benzoyl chloride followed by purification with flash column chromatography (gradient 0-50% EtOAc in hexane) to afford **34** as a pink solid (200 mg, 43%). <sup>1</sup>H NMR (500 MHz, DMSO-*d*<sub>6</sub>)  $\delta$  8.32 (d,  $J = 8.4$  Hz, 2H), 8.16 (d,  $J = 1.8$  Hz, 1H), 7.82 (d,  $J = 8.2$  Hz, 2H), 7.81 (d,  $J = 8.4$  Hz, 2H), 7.62 (dd,  $J = 8.5$ , 1.8 Hz, 1H), 7.17 (t,  $J = 55.6$  Hz, 1H). LC-MS (215 nm, 100%)  $R_T$  1.38 min, MS (ESI): mass calculated for  $C_{14}H_8^{79}BrF_2NO$ , 322.98;  $m/z$  found 323.80 [M + H]<sup>+</sup>.

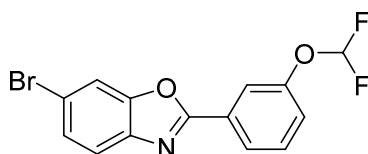

**6-Bromo-2-(3-(difluoromethoxy)phenyl)benzo[d]oxazole (35)**

The title compound was prepared from 2-amino-5-bromophenol and 3-(difluoromethoxy)benzoyl chloride followed by purification with flash column chromatography (gradient 0-30% EtOAc in hexane) to afford **35** as a red/brown solid (541 mg, 62%). <sup>1</sup>H NMR (250 MHz, DMSO-*d*<sub>6</sub>)  $\delta$  8.16 (d,  $J = 1.8$  Hz, 1H), 8.06 (dt,  $J = 7.8$ , 1.2 Hz, 1H), 7.94 – 7.89 (m, 1H), 7.80 (d,  $J = 8.5$  Hz, 1H), 7.74 – 7.66 (m, 1H), 7.61 (dd,  $J = 8.5$ , 1.8 Hz, 1H), 7.48 (dd,  $J = 8.0$ , 2.3 Hz, 1H), 7.41 (t,  $J = 73.6$  Hz, 1H). LC-MS (215 nm, 98%)  $R_T$  1.38 min, MS (ESI): mass calculated for  $C_{14}H_8^{81}BrF_2NO_2$ , 340.97;  $m/z$  found 341.75 [M + H]<sup>+</sup>.

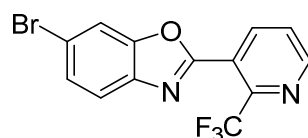

**6-Bromo-2-(2-(trifluoromethyl)pyridin-3-yl)benzo[d]oxazole (36)**

The title compound was prepared from 2-amino-5-bromophenol and 2-(trifluoromethyl)nicotinoyl chloride followed by purification with flash column chromatography (gradient 0-40% EtOAc in hexane) to afford **36** as a pink solid (545 mg, 75%). <sup>1</sup>H NMR (500 MHz, DMSO-*d*<sub>6</sub>)  $\delta$  8.29 – 8.21 (m, 1H), 8.18 (d,  $J = 1.8$  Hz, 1H), 7.95 – 7.91 (m, 1H), 7.90 (t,  $J = 54.8$  Hz, 1H), 7.85 (d,  $J = 8.5$  Hz, 1H), 7.83 – 7.80 (m, 1H), 7.63 (dd,  $J = 8.5$ , 1.8 Hz, 1H). LC-MS (215 nm, 66%)  $R_T$  0.94 min, MS (ESI): mass calculated for  $C_{13}H_6^{81}BrF_3N_2O$ , 343.96;  $m/z$  found 344.80 [M + H]<sup>+</sup>.

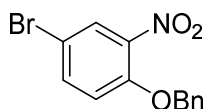

**1-(Benzyloxy)-4-bromo-2-nitrobenzene (4)**

To a mixture of 4-bromo-2-nitrophenol (600 mg, 2.75 mmol) and  $K_2CO_3$  (380 mg, 2.75 mmol) in acetone (10 mL) benzylbromide (0.36 mL, 3.03 mmol) was added and the resulting mixture was refluxed at 60 °C for 6 h. The reaction was cooled to RT and the solvent evaporated *in vacuo*. The residue was diluted with EtOAc, washed with water, brine, dried over  $Na_2SO_4$ , and the solvents were evaporated *in vacuo*. The title compound was obtained after purification with flash column chromatography (gradient 0-20% EtOAc in heptanes) as an off-white solid (1.37

g, 97%). <sup>1</sup>H NMR (250 MHz, DMSO-*d*<sub>6</sub>) δ 8.13 (d, *J* = 2.5 Hz, 1H), 7.84 (dd, *J* = 9.0, 2.5 Hz, 1H), 7.49 – 7.28 (m, 6H), 5.32 (s, 2H). LCMS (215 nm, 100%) R<sub>T</sub> 1.34 min.

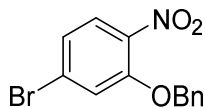

**2-(Benzyloxy)-4-bromo-1-nitrobenzene (5)**

The title compound was prepared from 5-bromo-2-nitrophenol (3.42 g, 15.7 mmol), benzyl bromide (2.05 mL, 17.3 mmol) and K<sub>2</sub>CO<sub>3</sub> (2.17 g, 15.7 mmol) in acetone (25 mL) using a method analogous to the synthesis of **4**. Purification with flash column chromatography (gradient 0-15% EtOAc in heptanes) afforded **5** as a yellow solid (3.6 g, 74%). <sup>1</sup>H NMR (500 MHz, DMSO-*d*<sub>6</sub>) δ 7.87 (d, *J* = 8.6 Hz, 1H), 7.73 (d, *J* = 2.0 Hz, 1H), 7.48 – 7.39 (m, 4H), 7.38 – 7.33 (m, 2H), 5.35 (s, 2H). LCMS (215 nm, 97%) R<sub>T</sub> 1.32 min.

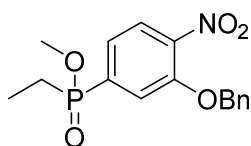

**Methyl (3-(benzyloxy)-4-nitrophenyl)(ethyl)phosphinate (9)**

A solution of **7** (3.5 g, 10.9 mmol) in SOCl<sub>2</sub> (12 mL) was heated at 70 °C for 2 h. The solvent was evaporated and the residue was dissolved in MeOH (30 mL) and stirred for 15 min, the solvents were evaporated *in vacuo* and the residue was diluted with CH<sub>2</sub>Cl<sub>2</sub>, washed with aqueous HCl (1 M), sat. NaHCO<sub>3</sub>, dried over Na<sub>2</sub>SO<sub>4</sub>, and concentrated *in vacuo* to afford the title compound as a brown solid (3.46 g, 81%). <sup>1</sup>H NMR (500 MHz, DMSO-*d*<sub>6</sub>) δ 8.02 (dd, *J* = 8.0, 3.3 Hz, 1H), 7.66 (dd, *J* = 12.2, 1.3 Hz, 1H), 7.49 – 7.39 (m, 5H), 7.37 – 7.31 (m, 1H), 5.41 (s, 2H), 3.51 (d, *J* = 11.0 Hz, 3H), 2.06 – 1.91 (m, 2H), 0.93 (dt, *J* = 19.2, 7.6 Hz, 3H). LCMS (215 nm, 94%) R<sub>T</sub> 1.13 min, MS (ESI): mass calculated for C<sub>16</sub>H<sub>18</sub>NO<sub>5</sub>P, 335.09; *m/z* found 335.95 [M + H]<sup>+</sup>.

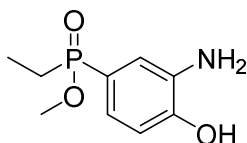

**Methyl (3-amino-4-hydroxyphenyl)(ethyl)phosphinate (10)**

To a solution of **8** (820 mg, 2.69 mmol) in EtOH/CH<sub>2</sub>Cl<sub>2</sub> (5:1, 30 mL) 10% Pd/C (286 mg, 0.27 mmol) was added and the resulting mixture was stirred at RT for 3 h under H<sub>2</sub>. The reaction mixture was then filtered through Celite™, washed with MeOH and the solvents were evaporated *in vacuo* to give the title compound as a colourless oil (555 mg, 96%). <sup>1</sup>H NMR (500 MHz, DMSO-*d*<sub>6</sub>) δ 9.78 (br s, 1H), 6.99 – 6.87 (m, 1H), 6.82 – 6.70 (m, 2H), 4.78 (br s, 2H), 3.43 (d, *J* = 10.8 Hz, 3H), 1.85 – 1.65 (m, 2H), 0.93 (dt, *J* = 18.4, 7.7 Hz, 3H). LCMS (215 nm, 100%) R<sub>T</sub> 0.34 min, MS (ESI): mass calculated for C<sub>9</sub>H<sub>14</sub>NO<sub>3</sub>P, 215.07; *m/z* found 215.85 [M + H]<sup>+</sup>, 213.85 [M - H]<sup>-</sup>.

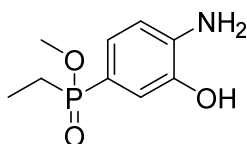

**Methyl (4-amino-3-hydroxyphenyl)(ethyl)phosphinate (11)**

The title compound was prepared from **9** (3.45 g, 9.3 mmol) and 10% Pd/C (0.988 g, 0.93 mmol) in EtOH/CH<sub>2</sub>Cl<sub>2</sub> (5:1, 90 mL), using a method analogous to the synthesis of **10**, and

isolated as a brown solid (2.0 g, 94%).  $^1\text{H}$  NMR (250 MHz,  $\text{DMSO-}d_6$ )  $\delta$  9.39 (br s, 1H), 6.95 (dd,  $J = 11.8, 1.6$  Hz, 1H), 6.97 – 6.81 (m, 1H), 6.66 (dd,  $J = 7.9, 4.0$  Hz, 1H), 5.17 (br s, 2H), 3.42 (d,  $J = 10.9$  Hz, 5H), 1.83 – 1.63 (m, 2H), 1.11 – 0.83 (m, 3H). LCMS (215 nm, 90%)  $R_T$  0.64 min, MS (ESI): mass calculated for  $\text{C}_9\text{H}_{14}\text{NO}_3\text{P}$ , 215.07;  $m/z$  found 215.90  $[\text{M} + \text{H}]^+$ .

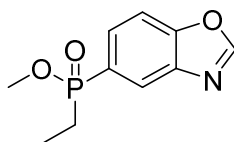

*Methyl benzo[d]oxazol-5-yl(ethyl)phosphinate (12)*

To a suspension of **10** (6.6 g, 30.7 mmol) in xylenes (100 mL) diethoxymethoxyethane (18 mL, 108 mmol) and pyridinium *p*-toluenesulfonate (771 mg, 3.07 mmol) were added and the resulting mixture was stirred at 140 °C for 3 h. The solvents were evaporated *in vacuo* and the desired product obtained after flash column chromatography (gradient 0-5% MeOH/ $\text{CH}_2\text{Cl}_2$ ) as an orange oil (747 mg, 91%).  $^1\text{H}$  NMR (250 MHz,  $\text{DMSO-}d_6$ )  $\delta$  8.90 (s, 1H), 8.15 (dd,  $J = 11.6, 1.3$  Hz, 1H), 7.97 (ddt,  $J = 8.3, 1.9, 0.9$  Hz, 1H), 7.80 (ddt,  $J = 10.7, 8.4, 1.2$  Hz, 1H), 3.51 (d,  $J = 10.9$  Hz, 3H), 2.09 – 1.87 (m, 2H), 0.96 (dt,  $J = 18.9, 7.7$  Hz, 3H). LCMS (215 nm, 92%)  $R_T$  0.80 min, MS (ESI): mass calculated for  $\text{C}_{10}\text{H}_{12}\text{NO}_3\text{P}$ , 225.06;  $m/z$  found 225.85  $[\text{M} + \text{H}]^+$ .

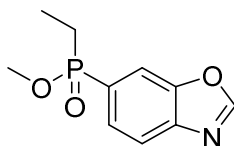

*Methyl benzo[d]oxazol-6-yl(ethyl)phosphinate (13)*

The title compound was prepared from **11** (724 mg, 2.86 mmol) diethoxymethoxyethane (1.67 mL, 10 mmol) and pyridinium *p*-toluenesulfonate (72 mg, 0.29 mmol) in xylenes (10 mL), using a method analogous to the synthesis of **12**. The desired product was obtained after flash column chromatography (gradient 0-15% MeOH/ $\text{CH}_2\text{Cl}_2$ ) as a brown oil (677 mg, 95%).  $^1\text{H}$  NMR (500 MHz,  $\text{DMSO-}d_6$ )  $\delta$  8.93 (s, 1H), 8.13 (dt,  $J = 11.7, 1.0$  Hz, 1H), 7.98 (ddd,  $J = 8.1, 2.7, 0.7$  Hz, 1H), 7.76 (ddd,  $J = 10.7, 8.1, 1.3$  Hz, 1H), 3.52 (d,  $J = 11.0$  Hz, 3H), 2.05 – 1.92 (m, 2H), 0.96 (dt,  $J = 19.0, 7.7$  Hz, 3H). LCMS (215 nm, 79%)  $R_T$  0.78 min, MS (ESI): mass calculated for  $\text{C}_{10}\text{H}_{12}\text{NO}_3\text{P}$ , 225.06;  $m/z$  found 225.90  $[\text{M} + \text{H}]^+$ .

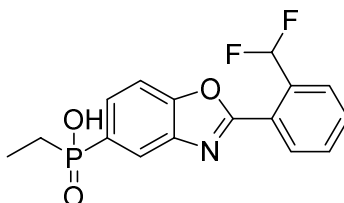

*(2-(2-(Difluoromethyl)phenyl)benzo[d]oxazol-5-yl)(ethyl)phosphinic acid (14a)*

In an oven-dried, nitrogen flushed pressure tube, **12** (150 mg, 0.67 mmol),  $\text{Pd}(\text{OAc})_2$  (7.5 mg, 0.03 mmol) and N-Xantphos (28 mg, 0.05 mmol) were suspended in DME (3 mL) and 1M LiHMDS (1.33 mL, 1.33 mmol) was added. The mixture was stirred at RT for 5 min. Bromo (difluoromethyl)benzene (166 mg, 0.80 mmol) was added and the reaction heated to 85 °C for 1 h. The solvent was evaporated *in vacuo* and the residue was purified by HPLC (acidic method) to afford the title compound as an orange solid (50 mg, 22%).  $^1\text{H}$  NMR (500 MHz,  $\text{DMSO-}d_6$ )  $\delta$  8.33 – 8.26 (m, 1H), 8.15 (d,  $J = 11.6$  Hz, 1H), 7.95 (dd,  $J = 8.3, 2.4$  Hz, 2H), 7.93 (t,  $J = 54.6$  Hz, 1H), 7.86 – 7.80 (m, 3H), 1.82 (dq,  $J = 15.2, 7.6$  Hz, 2H), 0.95 (dt,  $J = 18.4, 7.7$  Hz, 3H). LC-MS (215 nm, 99%)  $R_T$  1.06 min, MS (ESI): mass calculated for  $\text{C}_{16}\text{H}_{14}\text{F}_2\text{NO}_3\text{P}$ , 337.07;  $m/z$  found 337.90  $[\text{M} + \text{H}]^+$ .



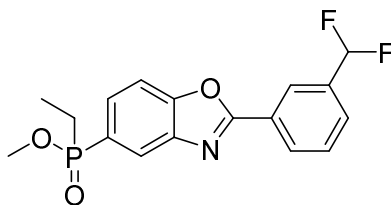

**Methyl (2-(3-(difluoromethyl)phenyl)benzo[d]oxazol-5-yl)(ethyl)phosphinate (15)**

The title compound was prepared from **12**, using a method analogous to the synthesis of **14a**. Purification with HPLC (acidic method) afforded **15** as a brown oil (19 mg, 12%). <sup>1</sup>H NMR (500 MHz, DMSO-*d*<sub>6</sub>) δ 8.44 – 8.37 (m, 2H), 8.18 (dd, *J* = 11.7, 1.4 Hz, 1H), 8.02 (dd, *J* = 8.3, 2.3 Hz, 1H), 7.89 (dd, *J* = 7.7, 1.7 Hz, 1H), 7.85 – 7.78 (m, 2H), 7.23 (t, *J* = 55.6 Hz, 1H), 3.54 (d, *J* = 10.9 Hz, 3H), 2.08 – 1.92 (m, 2H), 0.98 (dt, *J* = 18.9, 7.6 Hz, 3H). <sup>13</sup>C NMR (125.5 MHz, DMSO-*d*<sub>6</sub>) δ 162.7, 152.7 (d, *J* = 3.8 Hz), 141.7 (d, *J* = 17.2 Hz), 135.3 (t, *J* = 22.8 Hz), 130.3, 129.9, 129.4 (d, *J* = 5.8 Hz), 129.1 (d, *J* = 11.3 Hz), 127.6, 126.6, 124.8 (t, *J* = 6.5 Hz), 123.6 (d, *J* = 11.3 Hz), 114.3 (t, *J* = 236.5 Hz), 111.8 (d, *J* = 13.5 Hz), 50.8 (d, *J* = 6.0 Hz), 21.2 (d, *J* = 101.3 Hz), 5.8 (d, *J* = 4.7 Hz). <sup>31</sup>P NMR {H} (162 MHz, DMSO-*d*<sub>6</sub>) δ 46.8. <sup>19</sup>F NMR (376 MHz, DMSO-*d*<sub>6</sub>) δ -110.6 (d, *J* = 55.9 Hz). LC-MS (254 nm, 100%) R<sub>T</sub> 3.05 min, MS (ESI): mass calculated for C<sub>17</sub>H<sub>16</sub>F<sub>2</sub>NO<sub>3</sub>P, 352.1; *m/z* found 352.1 [M + H]<sup>+</sup>. HRMS (ESI): *m/z* calculated for C<sub>17</sub>H<sub>16</sub> F<sub>2</sub>NO<sub>3</sub>P + H<sup>+</sup> [M + H]<sup>+</sup>: 352.09086. Found: 352.09037.

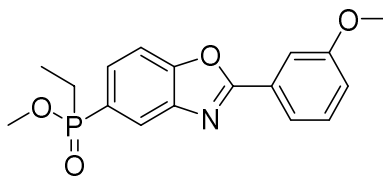

**Methyl ethyl(2-(3-methoxyphenyl)benzo[d]oxazol-5-yl)phosphinate (17)**

3-methoxybenzoyl chloride (64.7 μL, 0.46 mmol) was added to a solution of **10** (90 mg, 0.42 mmol) in dioxane (4 mL) and stirred at RT for 1 h. In(OTf)<sub>3</sub> (23.51 mg, 0.04 mmol) was added and the reaction mixture was stirred at 100 °C overnight. The solvents were evaporated in vacuo, the residue was dissolved in CH<sub>2</sub>Cl<sub>2</sub> and washed with 0.5 M aq. HCl, then sat. aq. NaHCO<sub>3</sub>, dried over Na<sub>2</sub>SO<sub>4</sub>, and concentrated to give a yellow oil. The desired product was obtained after purification with HPLC (acidic method) as a white solid (36 mg, 26%). mp 102–3 °C. <sup>1</sup>H NMR (500 MHz, DMSO-*d*<sub>6</sub>) δ 8.15 (dd, *J* = 11.6, 1.3 Hz, 1H), 7.99 (dd, *J* = 8.4, 2.3 Hz, 1H), 7.86 – 7.76 (m, 2H), 7.75 – 7.66 (m, 1H), 7.56 (t, *J* = 8.0 Hz, 1H), 7.25 (dd, *J* = 8.2, 2.6 Hz, 1H), 3.89 (s, 3H), 3.53 (d, *J* = 10.9 Hz, 3H), 2.08 – 1.93 (m, 2H), 0.98 (dt, *J* = 18.9, 7.6 Hz, 3H). <sup>13</sup>C NMR (125.5 MHz, DMSO-*d*<sub>6</sub>) δ 163.4, 159.7, 152.6, 141.7 (d, *J* = 16.6 Hz), 130.7, 128.9 (d, *J* = 10.9 Hz), 127.2, 126.9 (d, *J* = 120.8 Hz), 123.4 (d, *J* = 11.0 Hz), 119.9, 118.7, 112.1, 111.7 (d, *J* = 13.7 Hz), 55.5, 50.8 (d, *J* = 6.4 Hz), 21.2 (d, *J* = 101.7 Hz), 5.8 (d, *J* = 4.6 Hz). <sup>31</sup>P NMR {H} (162 MHz, DMSO-*d*<sub>6</sub>) δ 46.8. LC-MS (215 nm, 100%) R<sub>T</sub> 1.14 min, MS (ESI): mass calculated for C<sub>17</sub>H<sub>18</sub>NO<sub>4</sub>P, 331.10; *m/z* found 331.95 [M + H]<sup>+</sup>. HRMS (ESI): *m/z* calculated for C<sub>17</sub>H<sub>18</sub>NO<sub>4</sub>P + H<sup>+</sup> [M + H]<sup>+</sup>: 332.1046. Found: 332.1049.

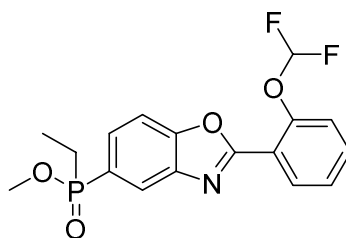

**Methyl (2-(2-(difluoromethoxy)phenyl)benzo[d]oxazol-5-yl)(ethyl)phosphinate (18)**

The title compound was prepared from **12** and 1-bromo-2-(difluoromethoxy)benzene with a similar method to general procedure 3, using Pd(dppf)Cl<sub>2</sub> as a catalyst and obtained as a brown gum (57 mg, 34%). <sup>1</sup>H NMR (500 MHz, DMSO-*d*<sub>6</sub>) δ 8.22 (dd, *J* = 7.8, 1.7 Hz, 1H), 8.18 (dd, *J* = 11.8, 1.5, 1H), 7.98 (dd, *J* = 8.3, 2.3 Hz, 1H), 7.82 (ddd, *J* = 10.9, 8.3, 1.4 Hz, 1H), 7.74 (ddd, *J* = 8.3, 7.4, 1.8 Hz, 1H), 7.52 (td, *J* = 7.6, 1.1 Hz, 1H), 7.47 (dd, *J* = 8.2, 1.1 Hz, 1H), 7.35 (t, *J* = 73.8 Hz, 1H), 3.52 (d, *J* = 11.0 Hz, 3H), 2.07 – 1.93 (m, 2H), 0.97 (dt, *J* = 18.9, 7.7 Hz, 3H). <sup>13</sup>C NMR (126 MHz, DMSO-*d*<sub>6</sub>) δ 161.0, 152.5 (d, *J* = 2.9 Hz), 149.0 (t, *J* = 3.4 Hz), 141.4 (d, *J* = 17.1 Hz), 133.8, 131.5, 129.1 (d, *J* = 11.2 Hz), 126.9 (d, *J* = 121.1 Hz), 126.3, 123.7 (d, *J* = 11.2 Hz), 121.3, 118.7, 116.0 (t, *J* = 259.3 Hz), 111.7 (d, *J* = 13.6 Hz), 50.8 (d, *J* = 6.6 Hz), 21.2 (d, *J* = 101.5 Hz), 5.8 (d, *J* = 4.7 Hz). <sup>31</sup>P NMR {H} (162 MHz, DMSO-*d*<sub>6</sub>) δ 46.8. <sup>19</sup>F NMR (376 MHz, DMSO-*d*<sub>6</sub>) δ -82.3 (d, *J* = 73.7 Hz). LC-MS (215 nm, 100%) R<sub>T</sub> 1.11 min, MS (ESI): mass calculated for C<sub>17</sub>H<sub>16</sub>F<sub>2</sub>NO<sub>4</sub>P, 367.08; *m/z* found 367.95 [M + H]<sup>+</sup>. HRMS (ESI): *m/z* calculated for C<sub>17</sub>H<sub>16</sub>F<sub>2</sub>NO<sub>4</sub>P + H<sup>+</sup> [M + H]<sup>+</sup>: 368.08578. Found: 368.08634.

**Biological evaluation**

Utrophin quantification using Western blotting has previously been reported in detail.<sup>1</sup> OX01914 was used as positive control. An example of an uncropped blot is reported below.

*Example of uncropped blot*

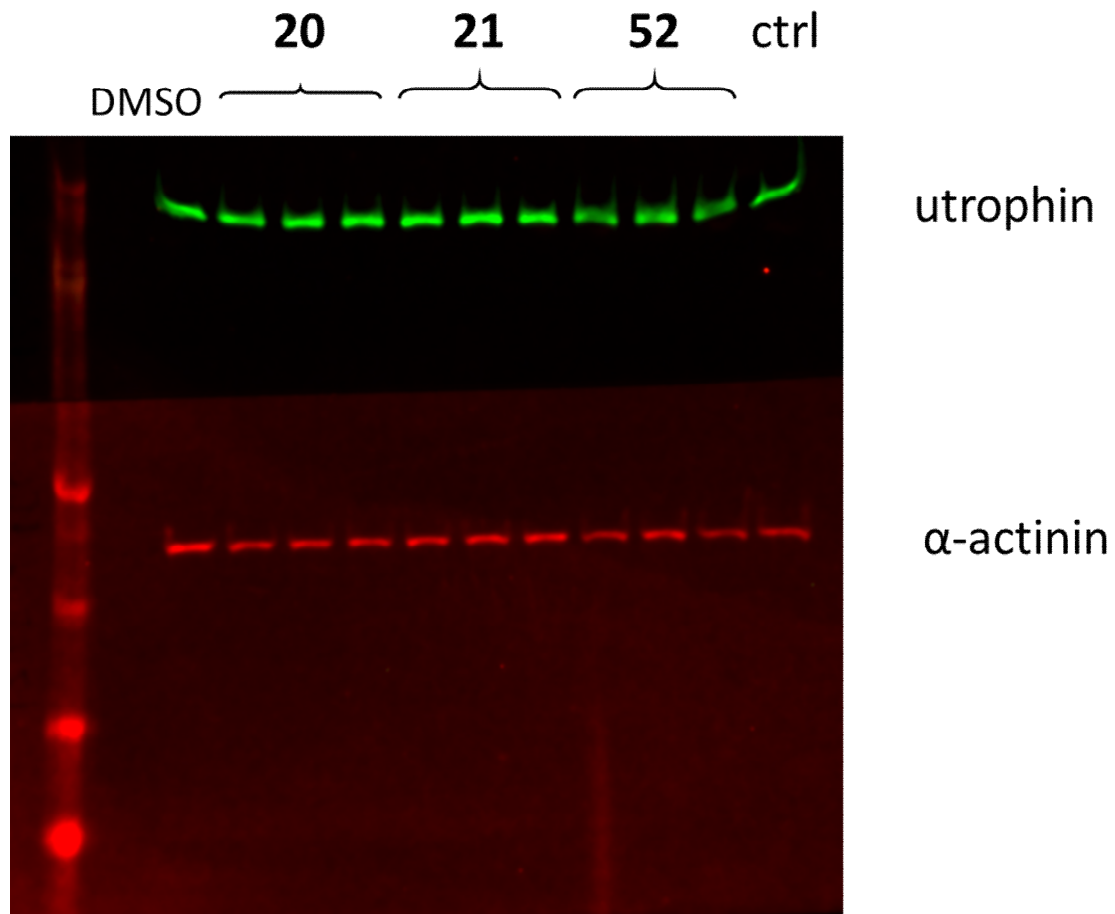

### *H2K reporter gene assay*

Cell culture: H2K-mdx utrA-luc cells<sup>2</sup> were maintained in DMEM High glucose (Invitrogen) supplemented with 20% Fetal Bovine Serum Gold (PAA), 2% CEE (SLI), 2 mM L-Glutamine (Invitrogen), 1% Penicillin Streptomycin (Invitrogen) and 2 µg/500 mL Mouse Interferon-γ (Roche). Cells were maintained at 10% CO<sub>2</sub> at 33 °C. EC<sub>50</sub> is the average from three or more biological replicates, 3 technical replicates each.

Utrophin firefly luciferase reporter gene assay: White flat bottomed 384 well plates (Corning) were seeded with 1500 H2K-mdx utrA-luc cells. After 16 h at 10% CO<sub>2</sub> and 33 °C, the cells were dosed with compound in triplicate from 10 mM solution stocks in DMSO (final DMSO concentration was 0.1%). Compounds were diluted in the following concentration series: 0.0003 µM, 0.001 µM, 0.003 µM, 0.01 µM, 0.03 µM, 0.1 µM, 0.3 µM, 1 µM, 3 µM, 10 µM, 30 µM. The cells were incubated for a further 24 h, (10% CO<sub>2</sub>, 33 °C). Relative luminescence readout after using the Luciferase Assay System (Promega, E1501) reagents was measured using an EnVision2103 plate reader (Perkin Elmer). The means from the biological triplicates were fitted with a four-parameter logistic function with least squares regression (Levenberg-Marquardt algorithm) to calculate EC<sub>50</sub> values.

### *Firefly luciferase biochemical inhibition assay*

Recombinant firefly luciferase (Quantilum Promega, E1701) was assayed at a final concentration of 0.6 nM in a buffer containing 25 mM HEPES, 5 mM MgCl<sub>2</sub>, 1 mM EDTA, 5 mM DTT and 1 mg/mL BSA. Compounds were diluted in the following concentration series: 0.95 nM, 3 nM, 9.5 nM, 30 nM, 95 nM, 0.3 µM, 0.95 µM, 3 µM, 9.5 µM, 30 µM, from 10 mM stocks in DMSO (with a final assay concentration of DMSO at 0.3%). PTC124 was used as a positive control.<sup>3</sup> Luciferase substrates ATP (Sigma) and D-luciferin (Promega) were used in a final assay concentration of 10 µM, close to their K<sub>M</sub> concentrations.<sup>4</sup> Luciferase was pre-incubated with ATP and the query compound at 0 °C for 15 min. D-Luciferin was dispensed and endpoint luminescence output immediately read using an EnSight plate reader (Perkin Elmer) FLUOstar Optima plate reader (BMG Labtech). Luminescence output was fitted with a four-parameter logistic function with least squares regression (Levenberg-Marquardt algorithm) to calculate IC<sub>50</sub> values. IC<sub>50</sub> is the average of three technical replicates.

### *Cytotoxicity assay in HepG2 cells*

Cell viability is based on ATP titration in intact cells using CellTiter-Glo® Reagent (provided by Promega) through the ATP-dependent oxydoreduction of luciferin by luciferase. Human hepatocarcinoma HepG2 cells (ATCC HB-8065) are plated at 2500 cells/well in 384-well plates (30 µl/well). After 4 h of incubation at 37°C, compounds 100-fold concentrated are added to the cells. After an incubation of 40 h at 37°C, the medium is removed, and CellTiter-Glo® Reagent is added for luminescence reading. Compounds are tested in duplicate at ten concentrations (final top concentration of 30 µM, semi log dilution factor). Results are expressed as a percentage of inhibition of cell viability.

## Characterization Data

1-(benzyloxy)-4-bromo-2-nitrobenzene (4)

PDA Chromatogram

1: Wavelength 215 nm, Band Width 4 nm

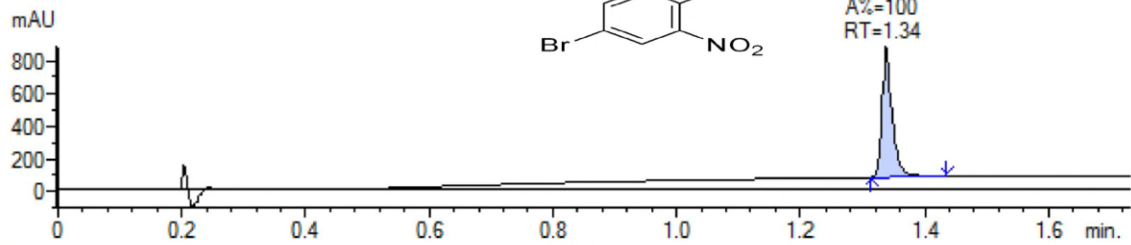

MS Spectrum

Group#1 - PDA Peak: 6, RT: 1.31 to 1.44 min

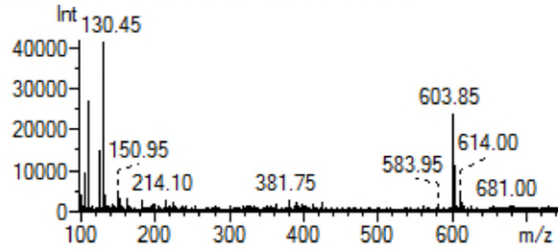

MS Spectrum

Group#2 - PDA Peak: 6, RT: 1.31 to 1.44 min

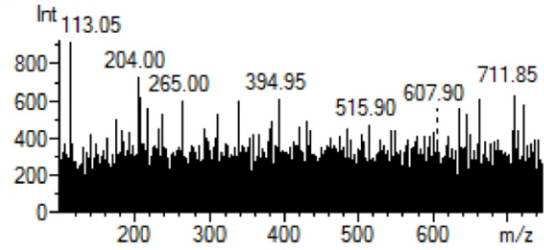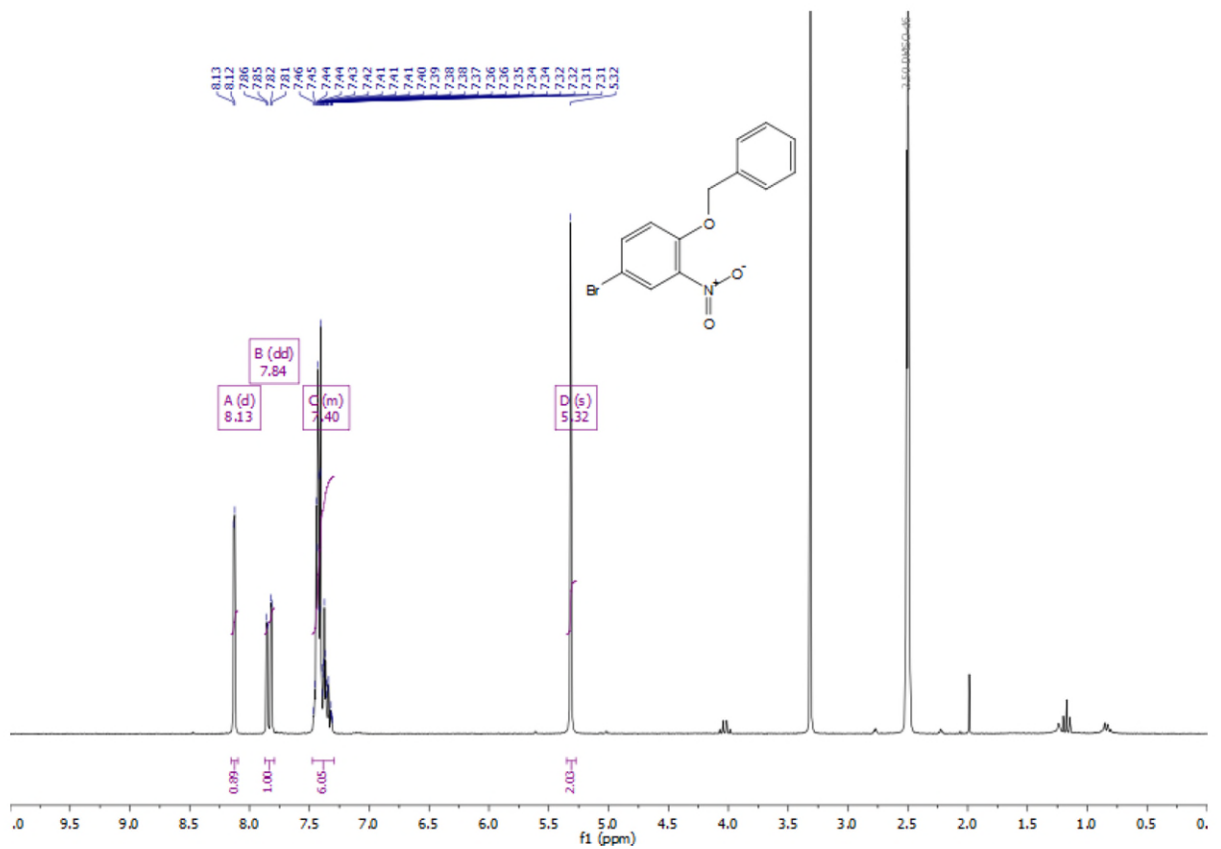

## 2-(benzyloxy)-4-bromo-1-nitrobenzene (5)

### MS Spectrum

Group#1 - LC Peak: 6, RT: 1.24 to 1.39 min

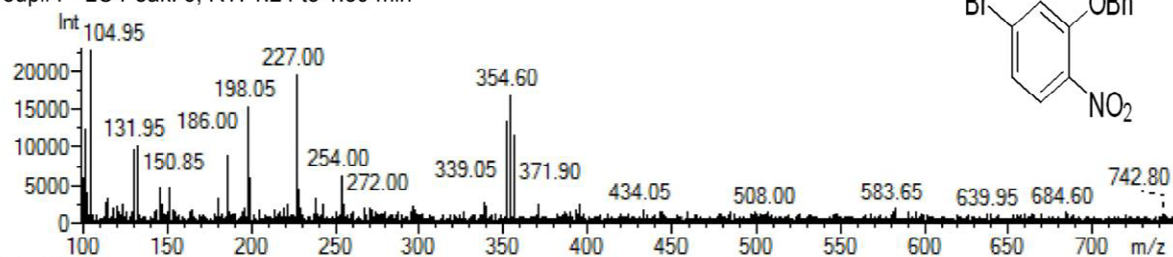

### PDA Chromatogram

1: Wavelength 215 nm, Band Width 4 nm

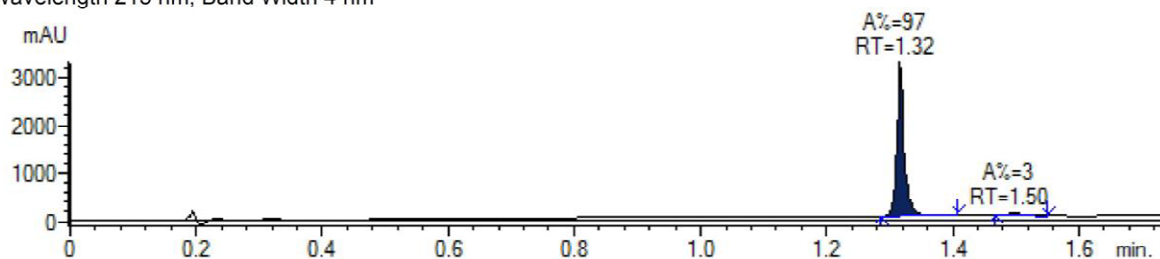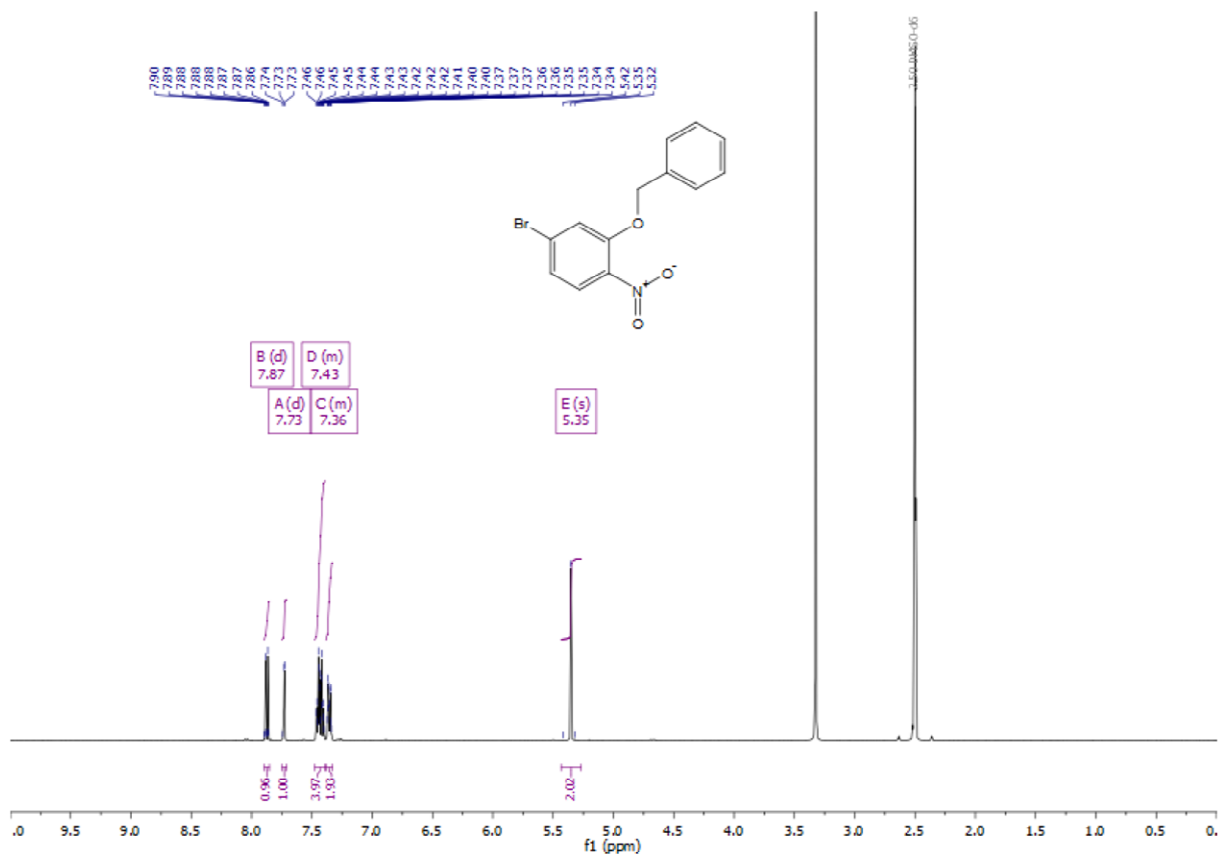

**(4-(benzyloxy)-3-nitrophenyl)(ethyl)phosphinic acid (6)**

**PDA Chromatogram**

1: Wavelength 215 nm, Band Width 4 nm

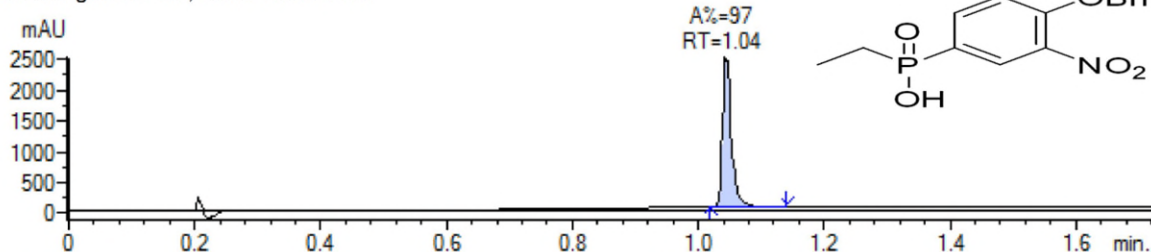

**MS Spectrum**

Group#1 - PDA Peak: 9, RT: 1.02 to 1.14 min

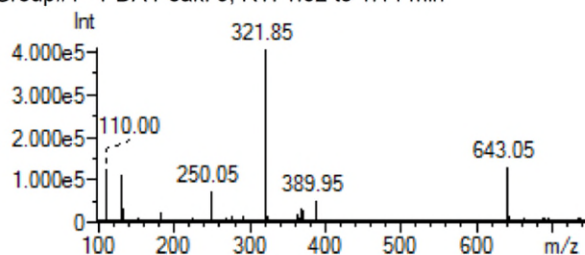

**MS Spectrum**

Group#2 - PDA Peak: 9, RT: 1.02 to 1.14 min

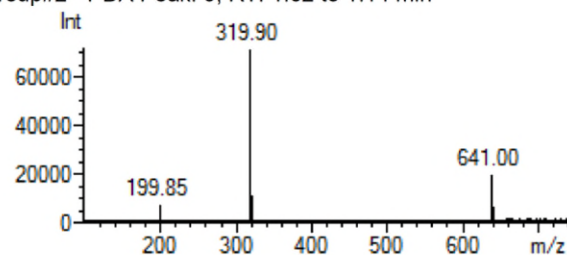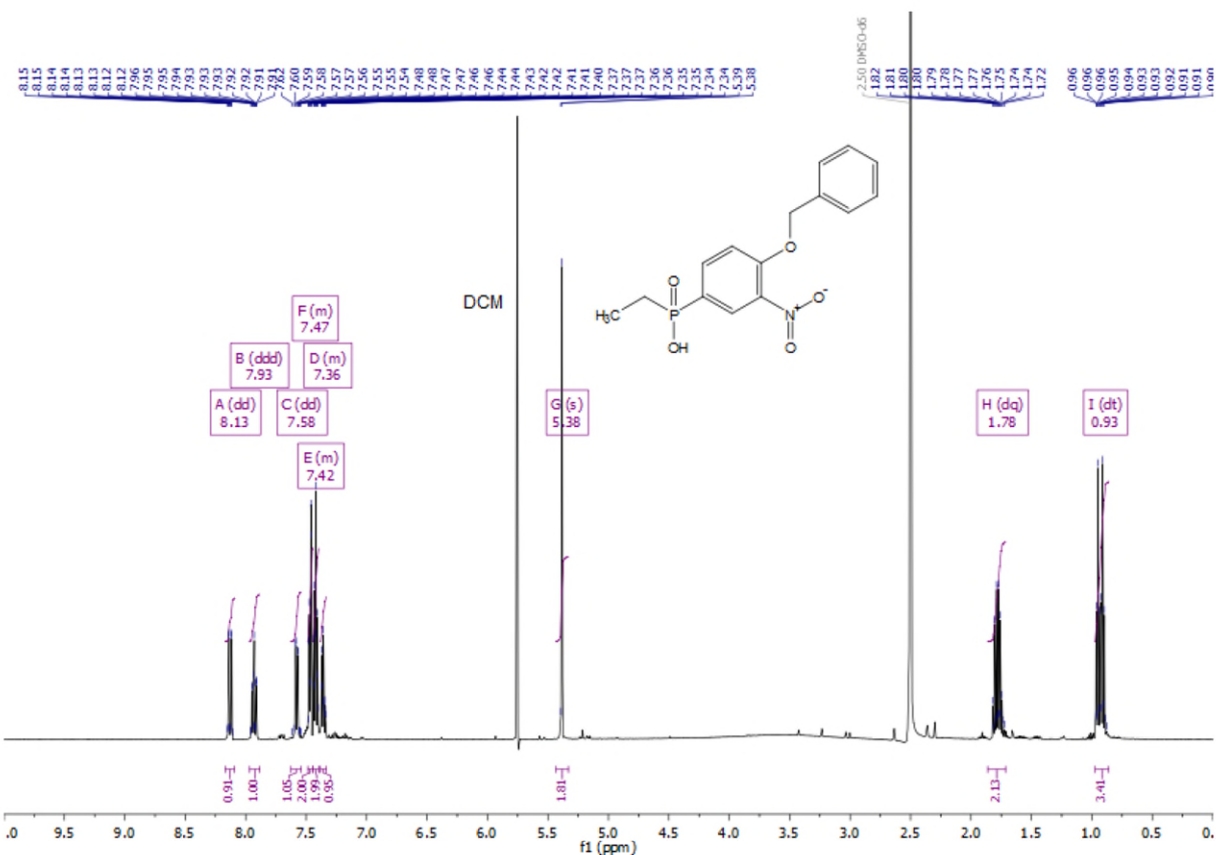



**(3-(benzyloxy)-4-nitrophenyl)(ethyl)phosphinic acid (7)**

**MS Spectrum**

Group#1 - PDA Peak: 7, RT: 0.99 to 1.13 min

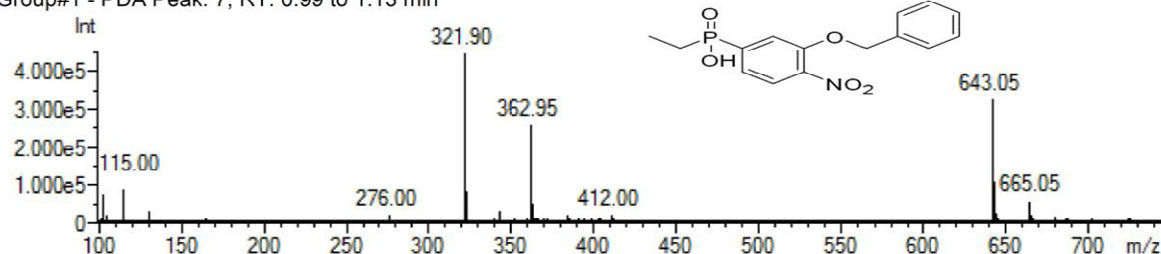

**PDA Chromatogram**

1: Wavelength 215 nm, Band Width 4 nm

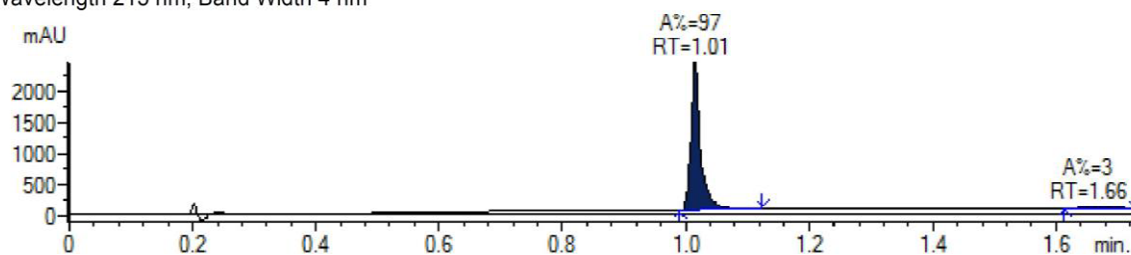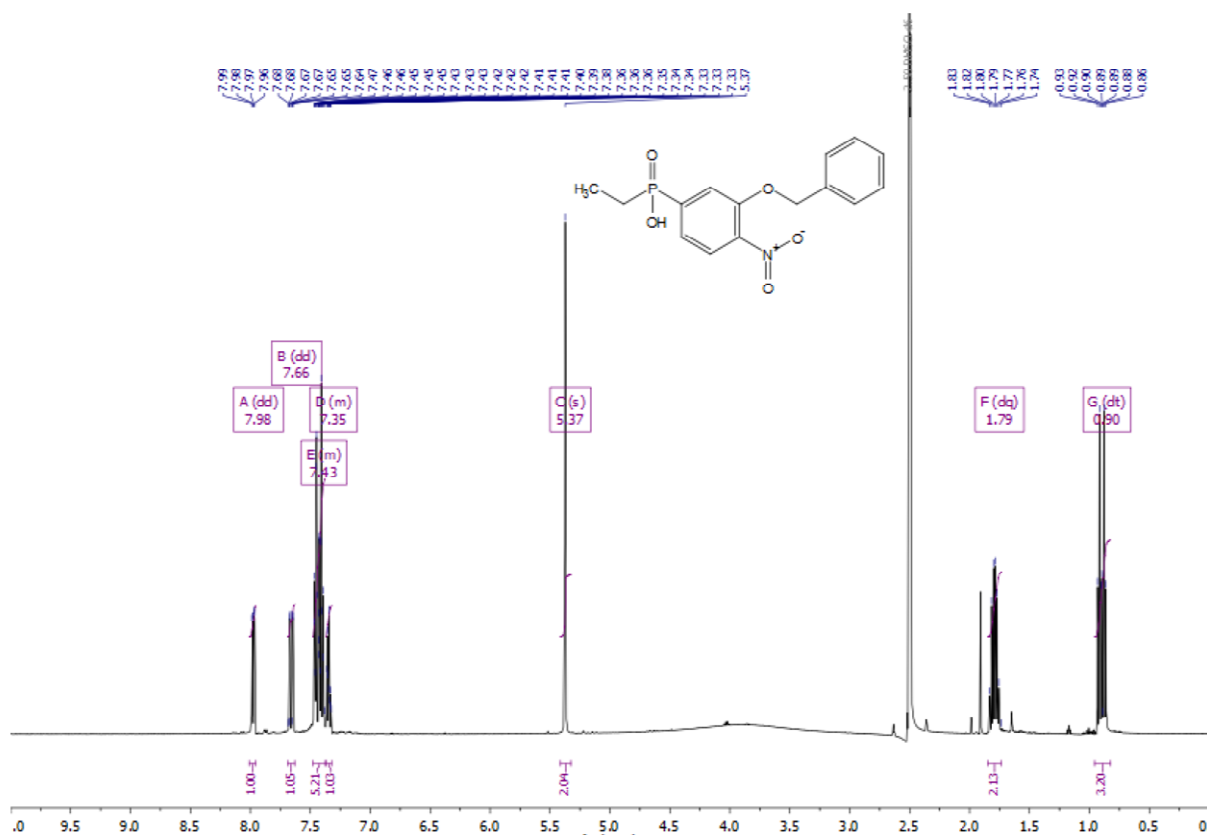

**methyl (4-(benzyloxy)-3-nitrophenyl)(ethyl)phosphinate (8)**

**PDA Chromatogram**

1: Wavelength 215 nm, Band Width 4 nm

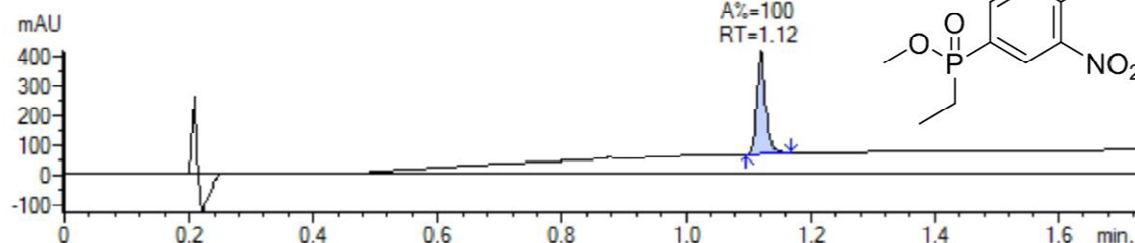

**MS Spectrum**

Group#1 - PDA Peak: 5, RT: 1.08 to 1.19 min

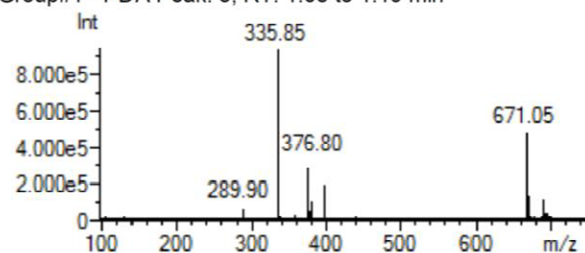

**MS Spectrum**

Group#2 - PDA Peak: 5, RT: 1.08 to 1.19 min

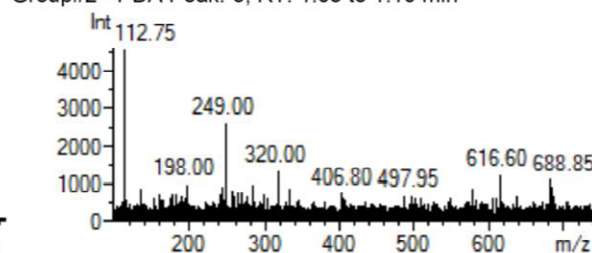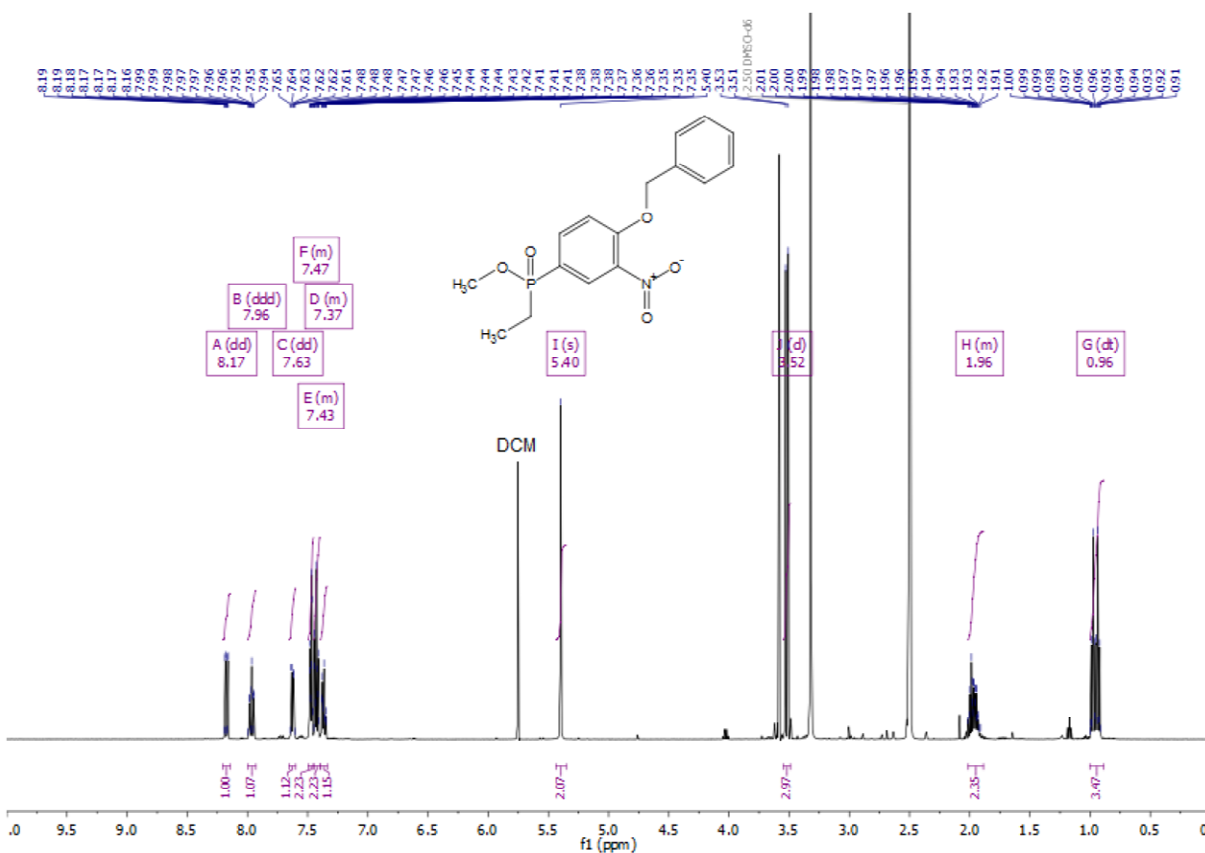

**methyl (3-(benzyloxy)-4-nitrophenyl)(ethyl)phosphinate (9)**

**MS Spectrum**

Group#1 - PDA Peak: 6, RT: 1.09 to 1.21 min

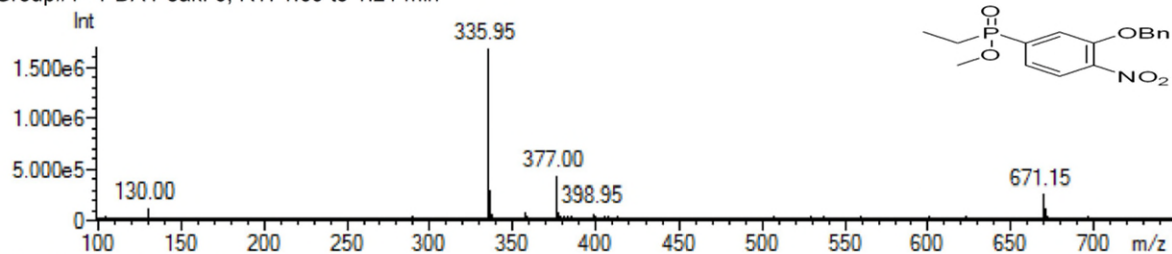

**PDA Chromatogram**

1: Wavelength 215 nm, Band Width 4 nm

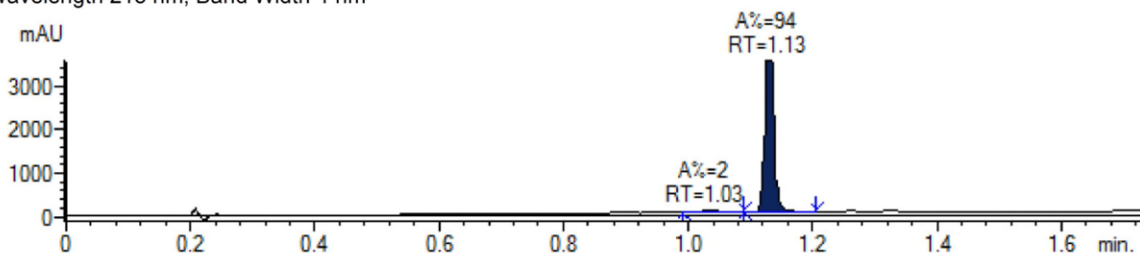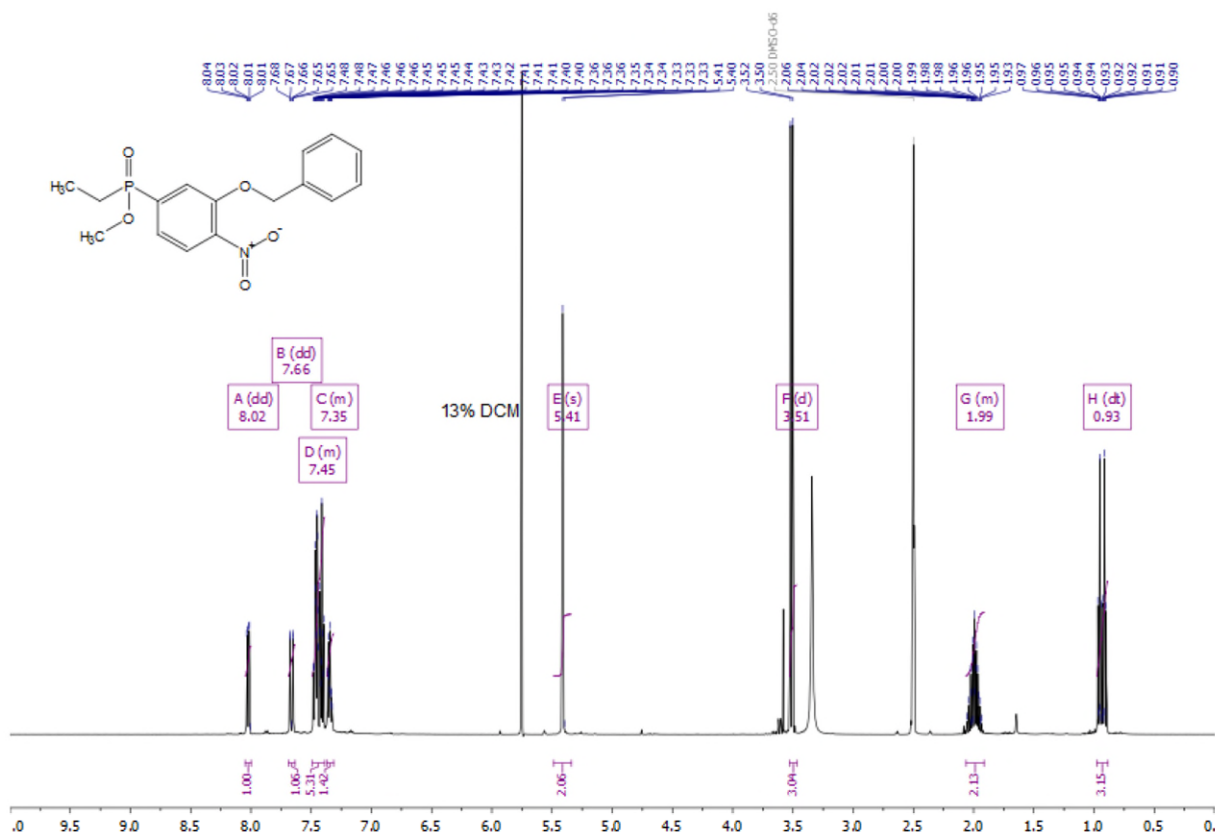

methyl (3-amino-4-hydroxyphenyl)(ethyl)phosphinate (10)

LC Chromatogram

LC#6 : ELS Detector

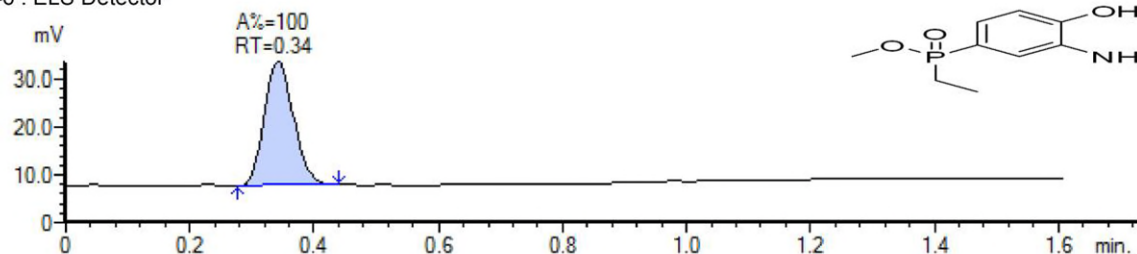

MS Spectrum

Group#1 - LC Peak: 2, RT: 0.28 to 0.44 min

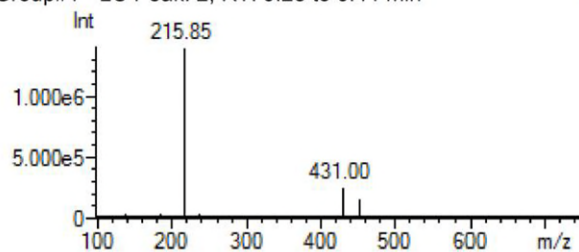

MS Spectrum

Group#2 - LC Peak: 2, RT: 0.28 to 0.44 min

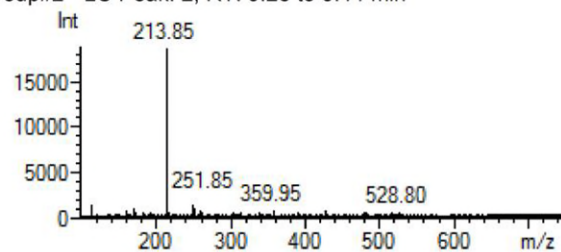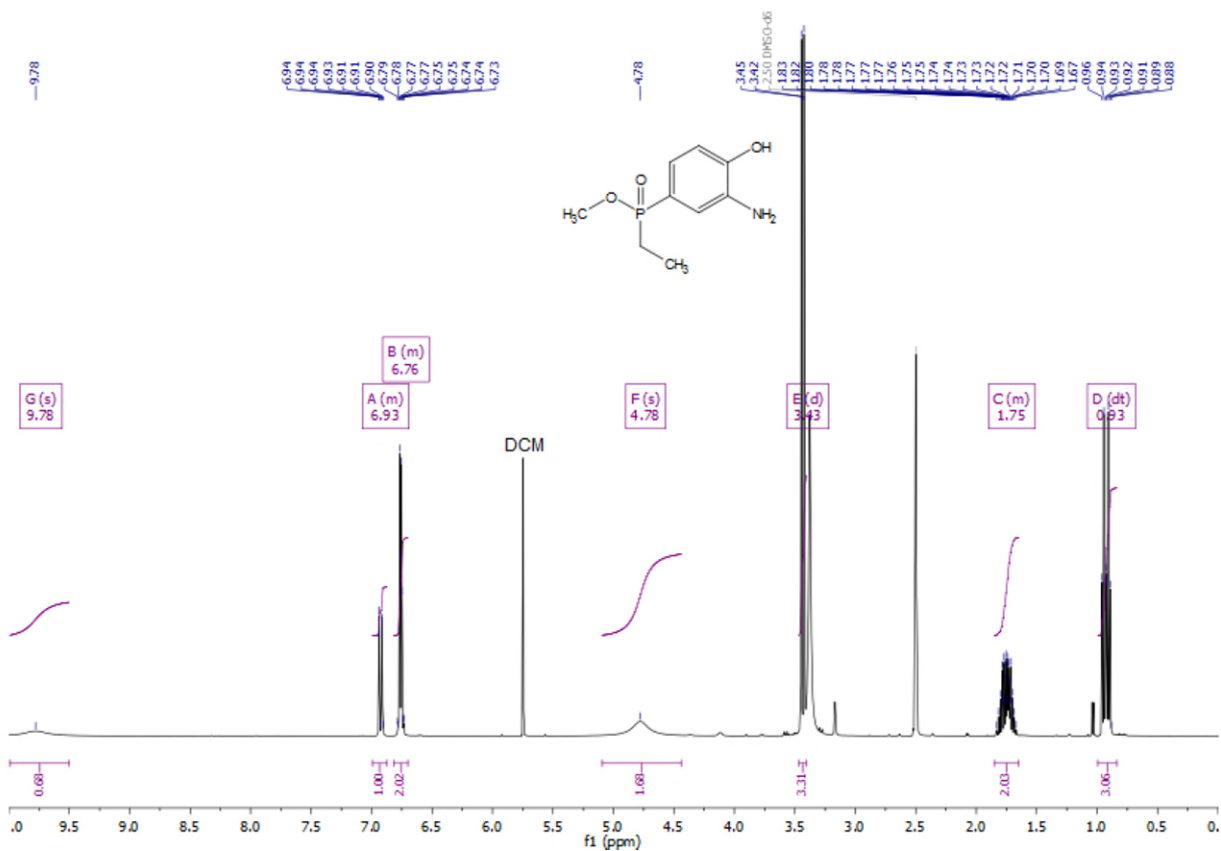

**methyl (4-amino-3-hydroxyphenyl)(ethyl)phosphinate (11)**

**MS Spectrum**

Group#1 - PDA Peak: 2, RT: 0.58 to 0.70 min

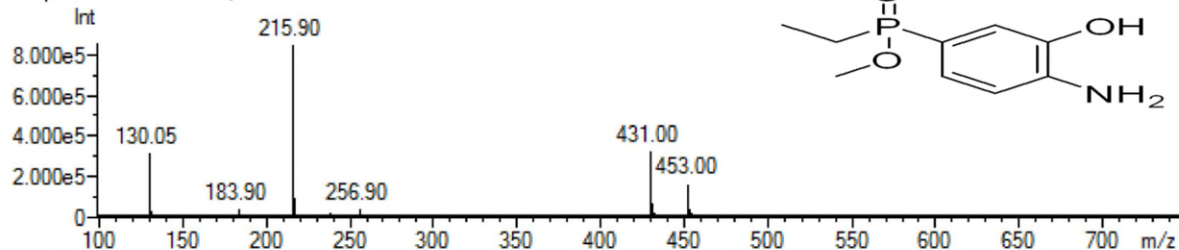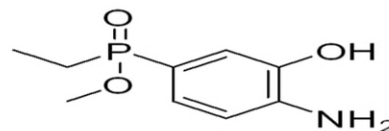

**PDA Chromatogram**

1: Wavelength 215 nm, Band Width 4 nm

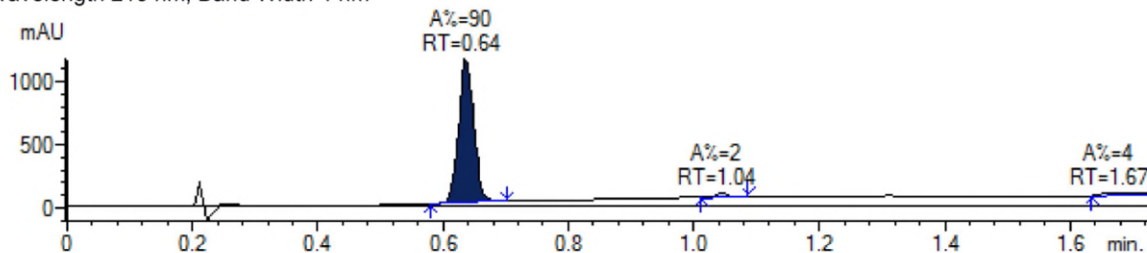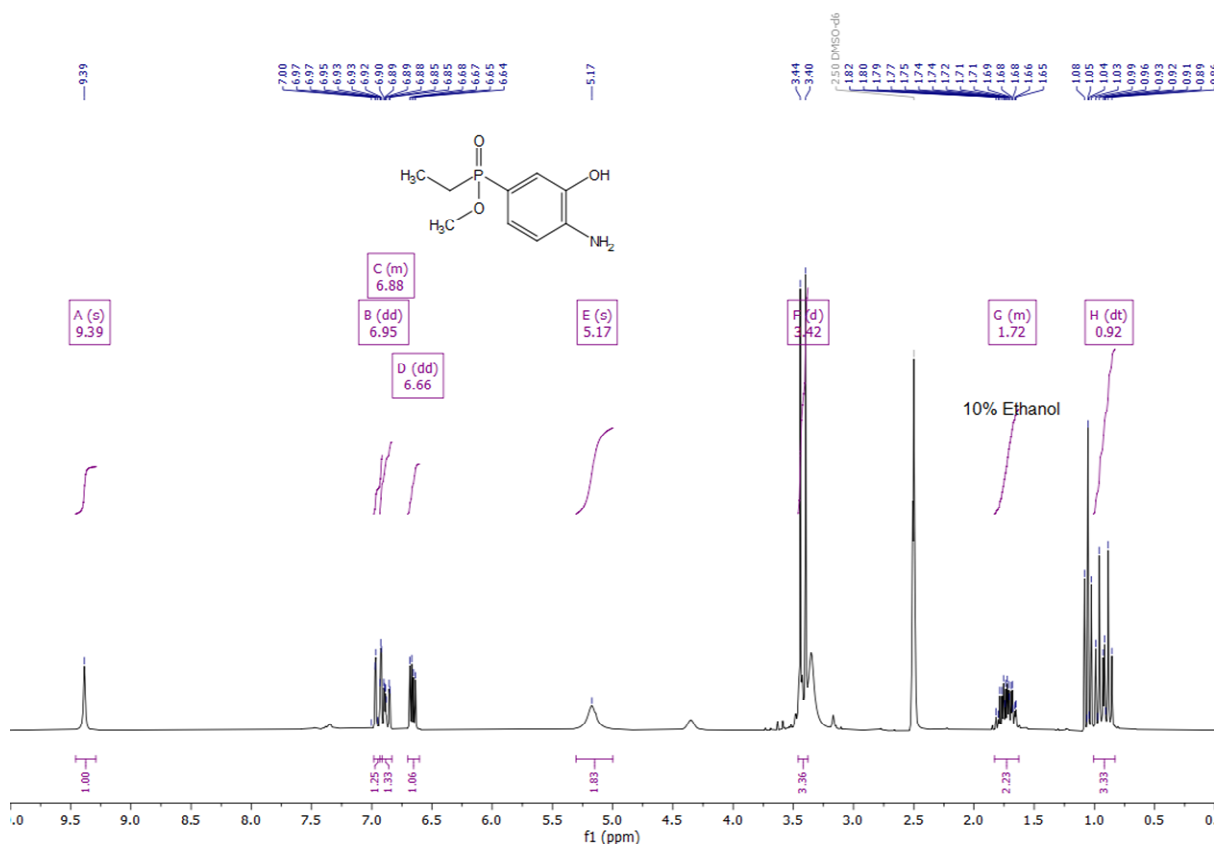

# methyl benzo[d]oxazol-5-yl(ethyl)phosphinate (12)

## PDA Chromatogram

1: Wavelength 215 nm, Band Width 4 nm

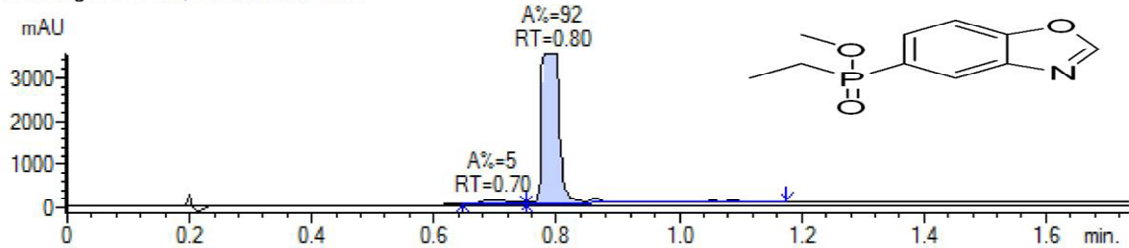

## MS Spectrum

Group#1 - PDA Peak: 6, RT: 0.75 to 1.18 min

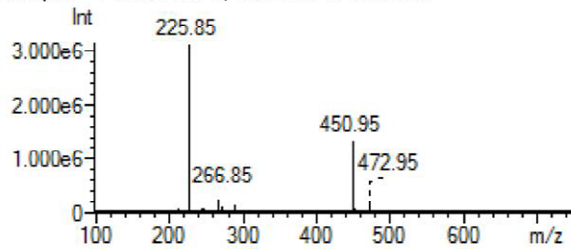

## MS Spectrum

Group#2 - PDA Peak: 6, RT: 0.75 to 1.18 min

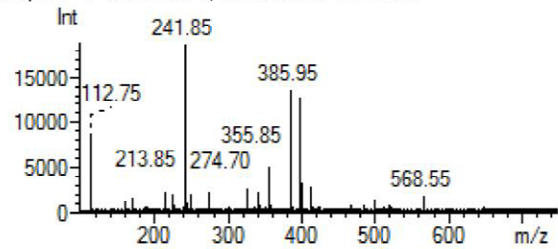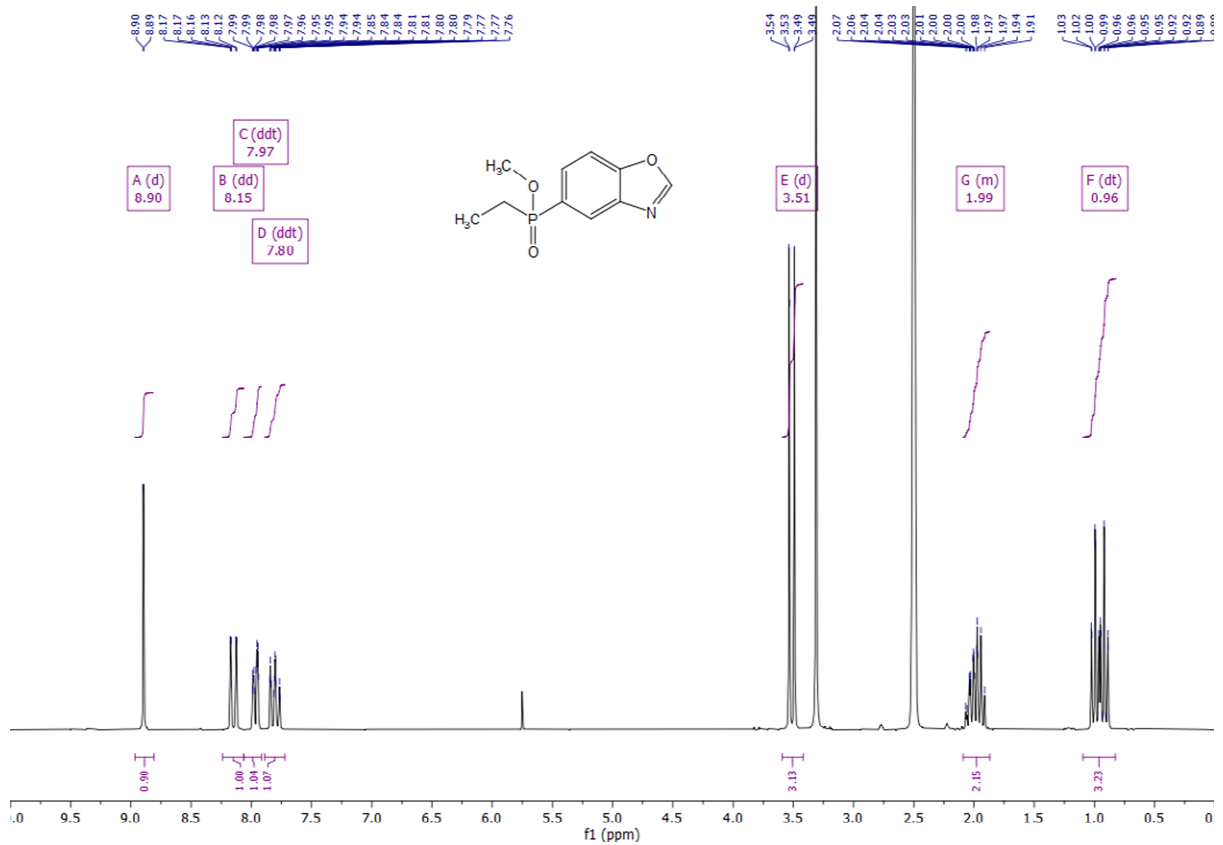

# methyl benzo[d]oxazol-6-yl(ethyl)phosphinate (13)

## PDA Chromatogram

1: Wavelength 215 nm, Band Width 4 nm

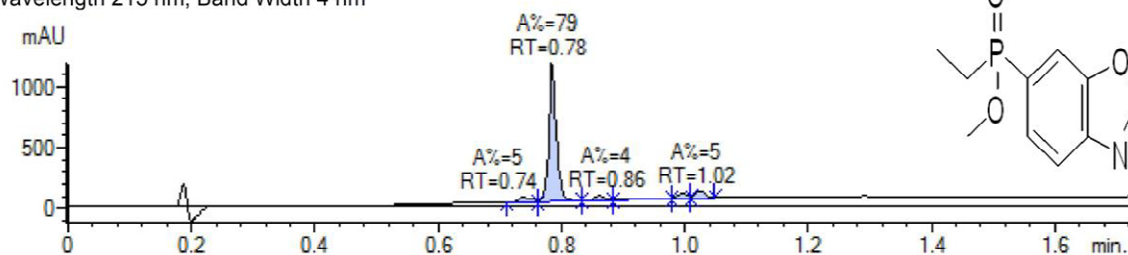

## MS Spectrum

Group#1 - PDA Peak: 4, RT: 0.71 to 0.76 min

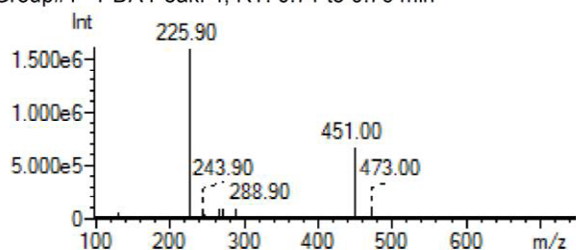

## MS Spectrum

Group#2 - PDA Peak: 4, RT: 0.71 to 0.76 min

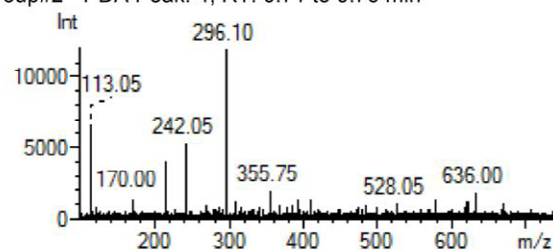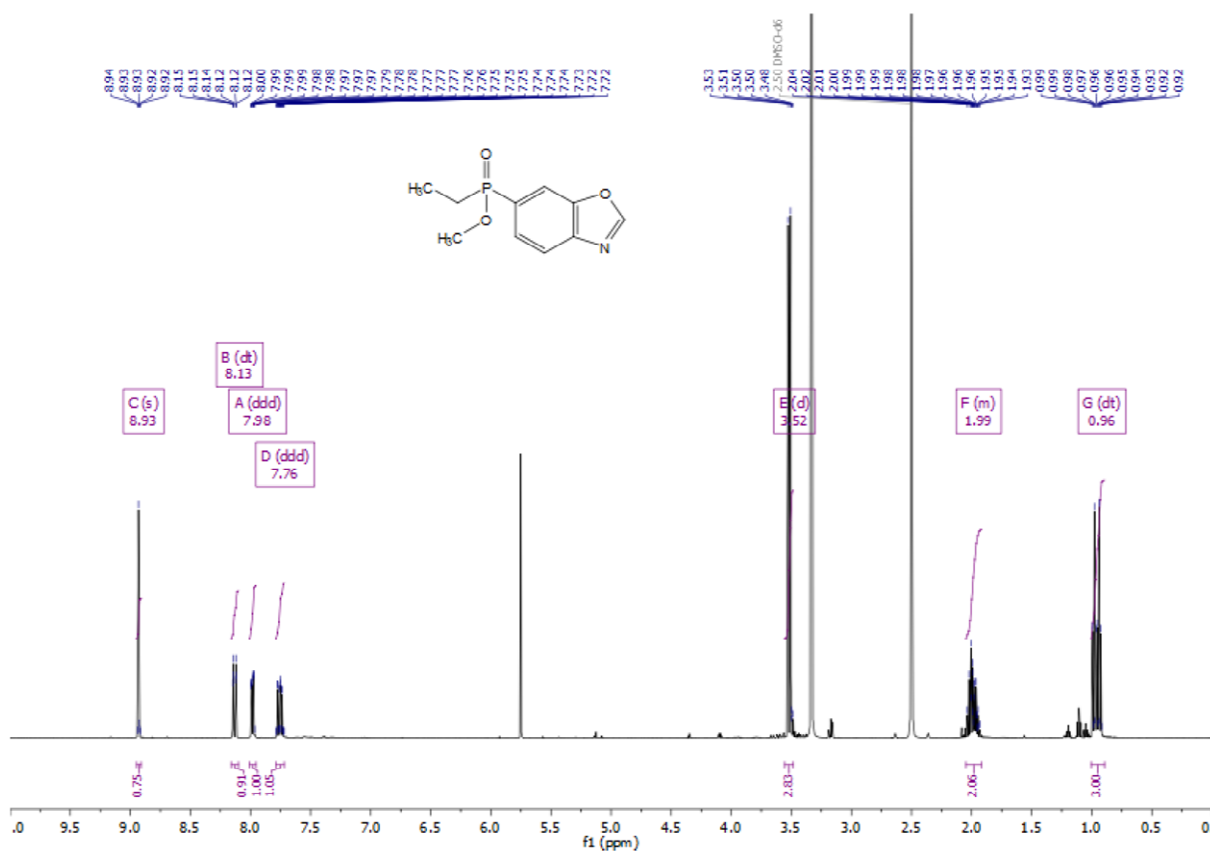

# (2-(2-(difluoromethyl)phenyl)benzo[d]oxazol-5-yl)(ethyl)phosphinic acid (14a)

## MS Spectrum

Group#1 - PDA Peak: 7, RT: 1.01 to 1.17 min

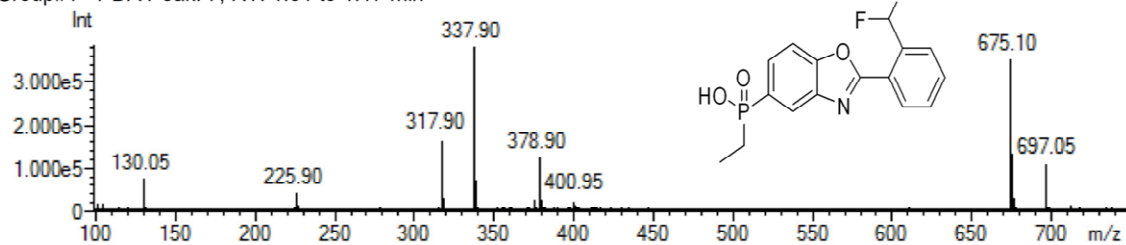

## PDA Chromatogram

1: Wavelength 215 nm, Band Width 4 nm

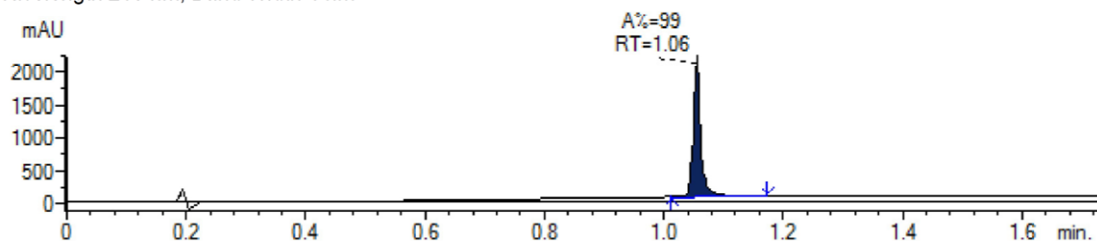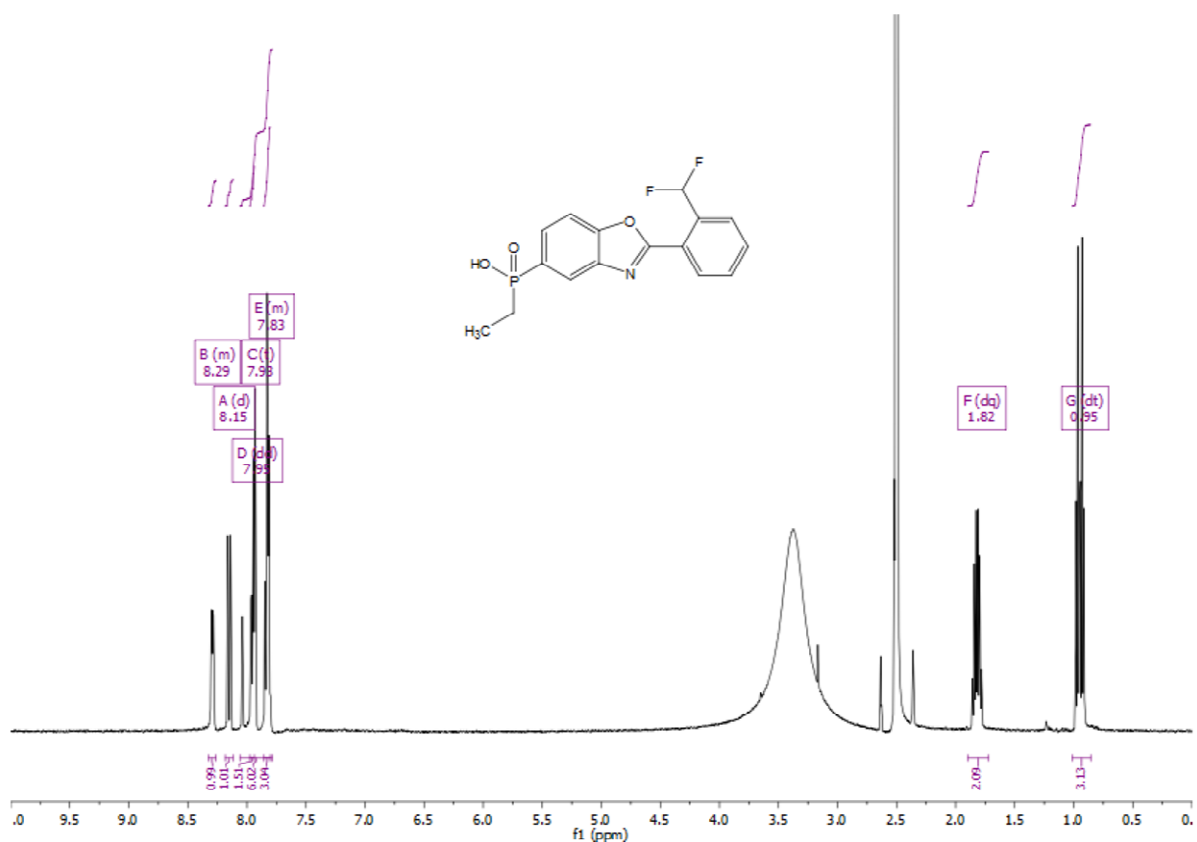



**methyl (2-(2-(difluoromethyl)phenyl)benzo[d]oxazol-5-yl)(ethyl)phosphinate (14)**

**MS Spectrum**

Group#1 - PDA Peak: 7, RT: 1.11 to 1.20 min

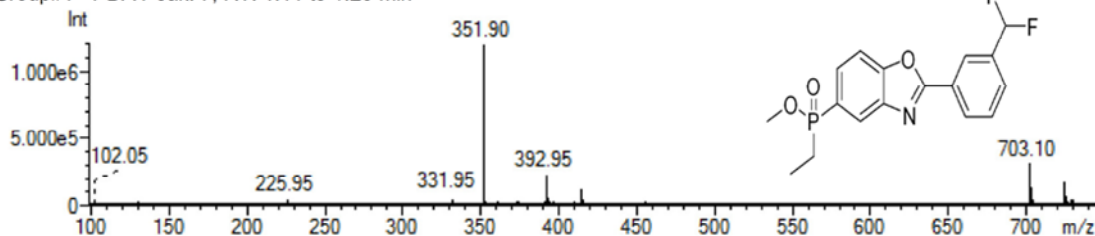

**PDA Chromatogram**

1: Wavelength 215 nm, Band Width 4 nm

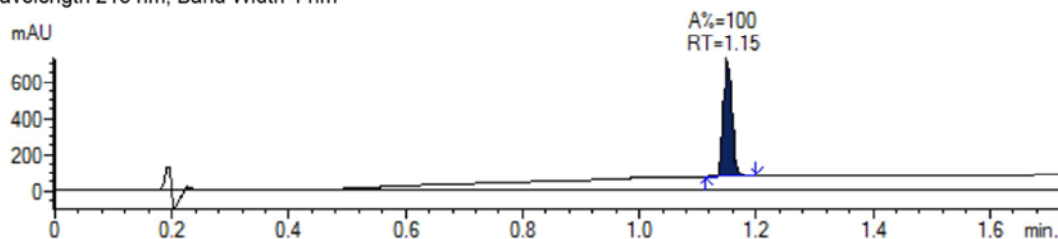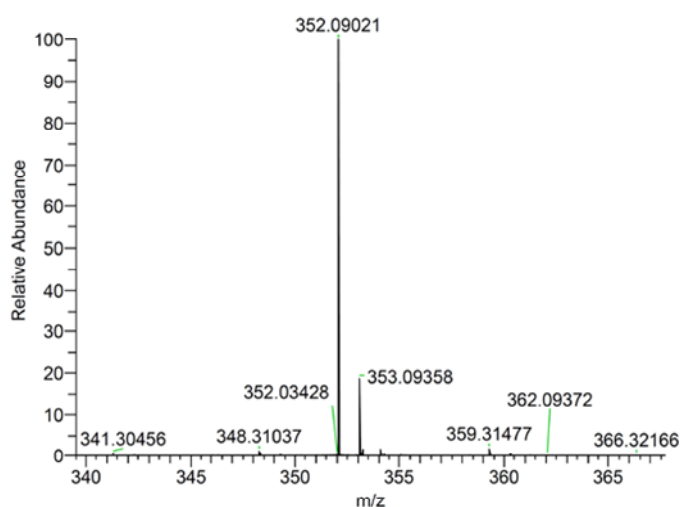

NL: 3.89E7  
ESI74311 #13-27 RT: 0.15-0.31 AV: 8 NL:  
3.89E+007  
T: FTMS (1,1) + p ESI Full ms  
[80.00-1600.00]

**Measured  
Spectrum**

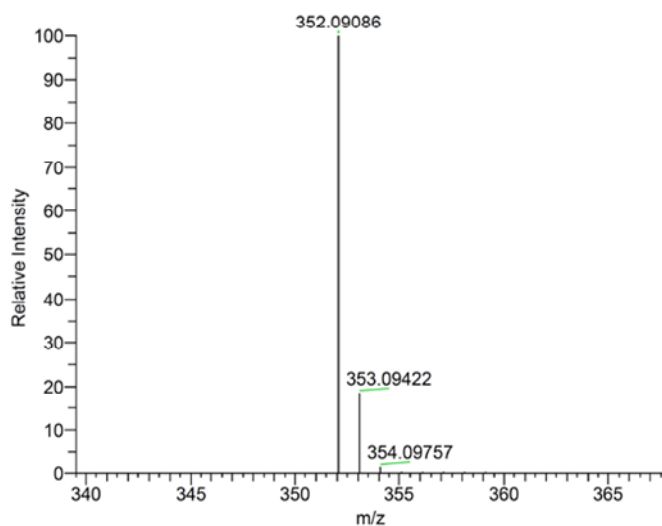

NL: 8.2ZE5  
C17H17O3N1F2P1: C<sub>17</sub> H<sub>17</sub> O<sub>3</sub> N F<sub>2</sub> P  
Chg 1 R: 1000000 Res. Pwr. @FWHM

**Theoretical  
Spectrum**

| m/z       | Formula                                                          | RDB | Delta ppm | Theo. Mass |
|-----------|------------------------------------------------------------------|-----|-----------|------------|
| 352.09021 | C <sub>17</sub> H <sub>17</sub> O <sub>3</sub> NF <sub>2</sub> P | 9.5 | -1.85     | 352.09086  |

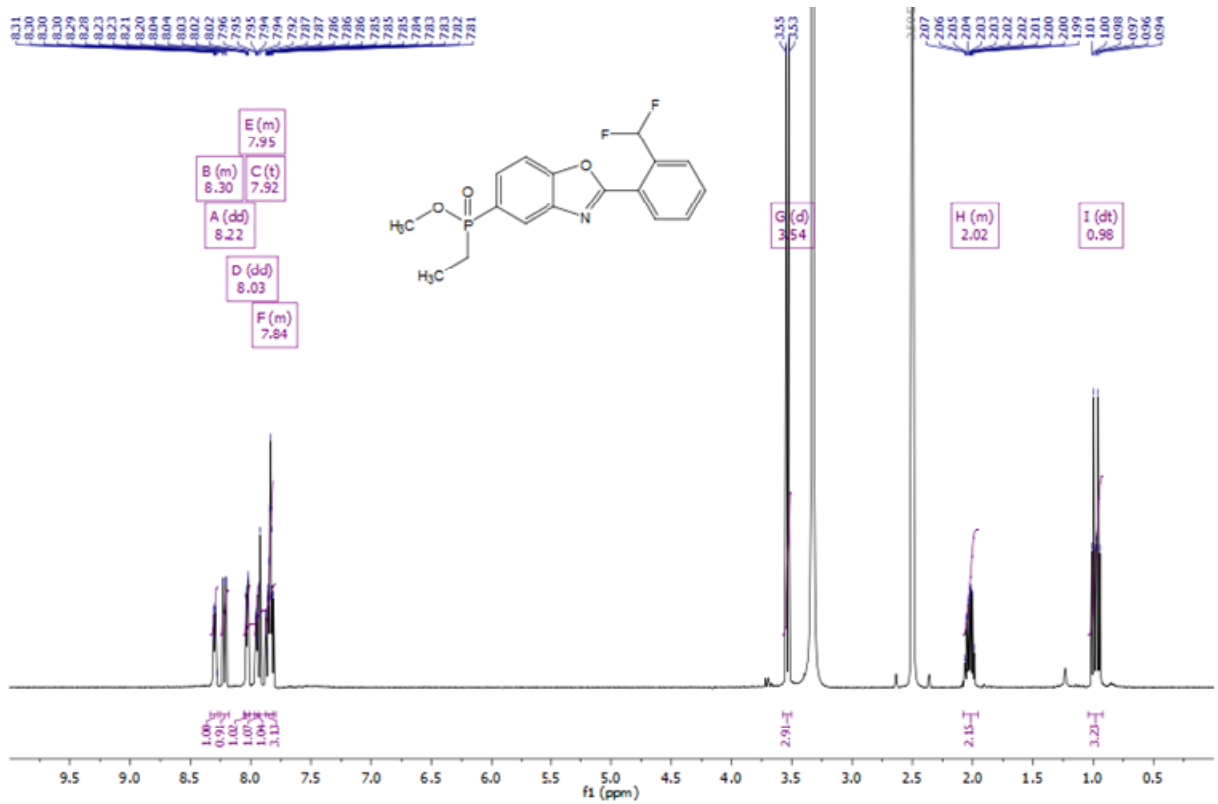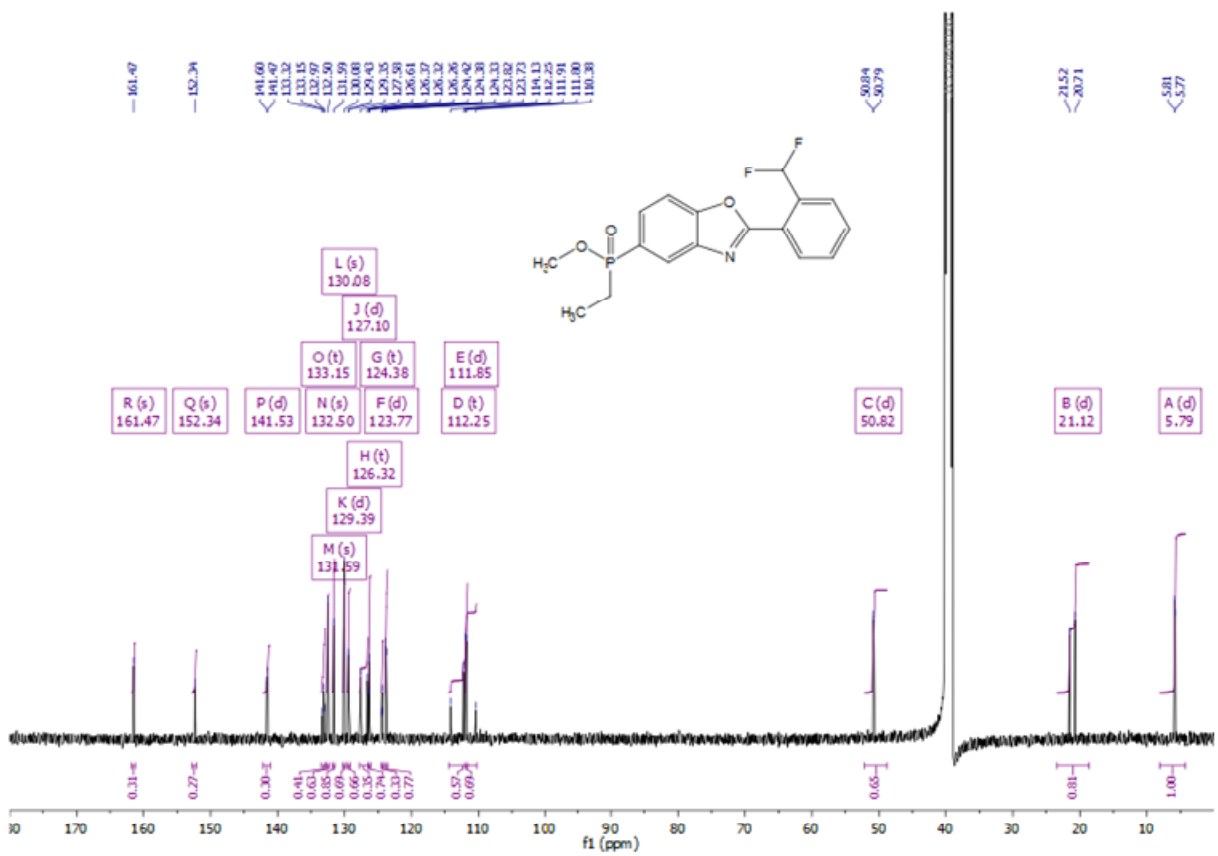

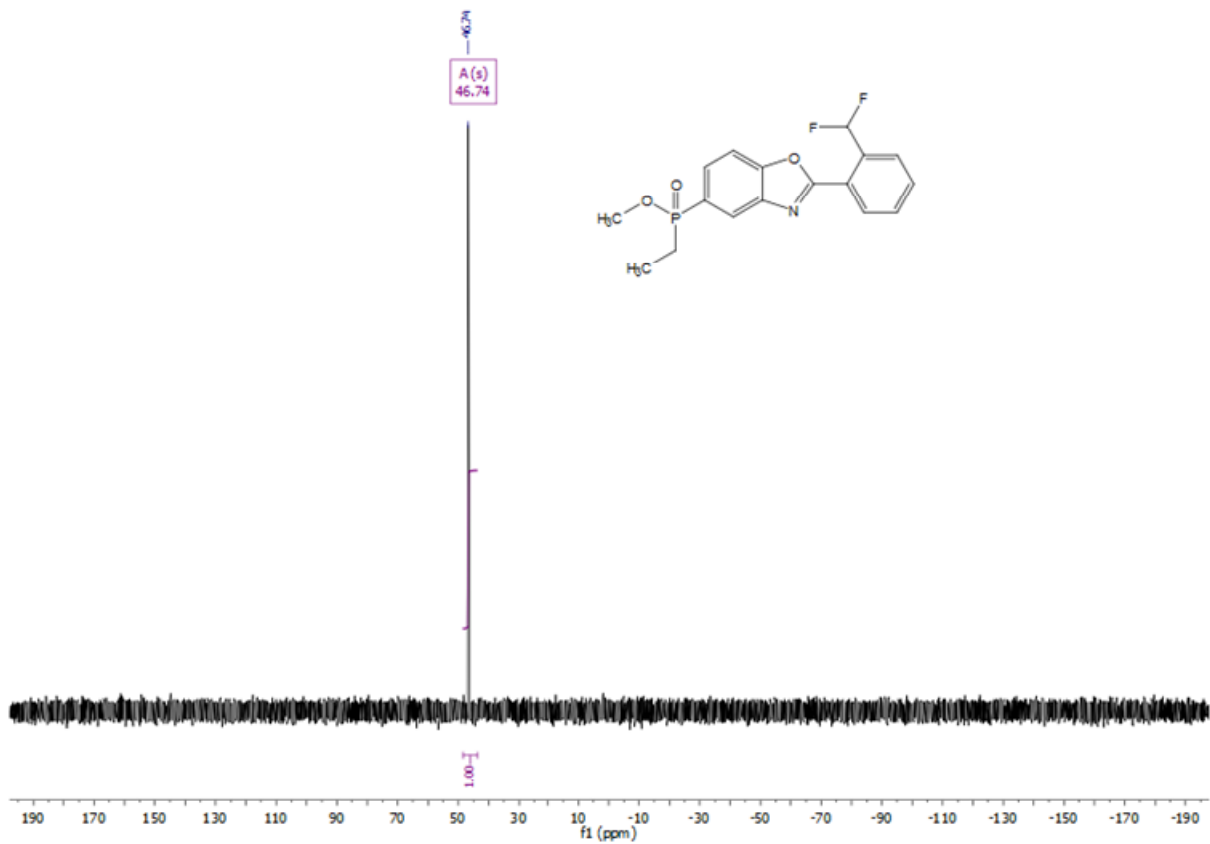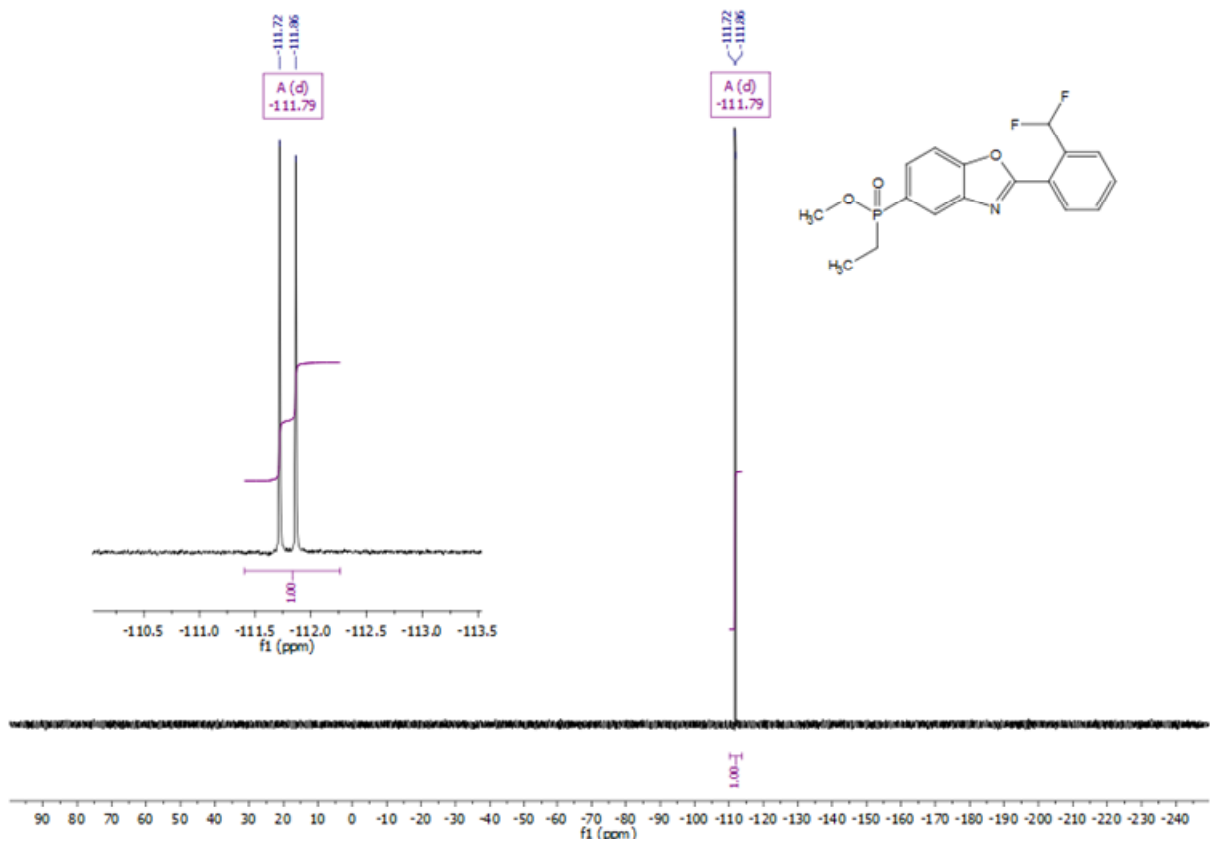

methyl (2-(3-(difluoromethyl)phenyl)benzo[d]oxazol-5-yl)(ethyl)phosphinate (15)

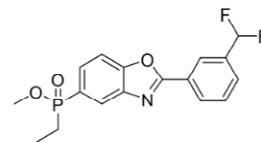

2: UV Detector: 254

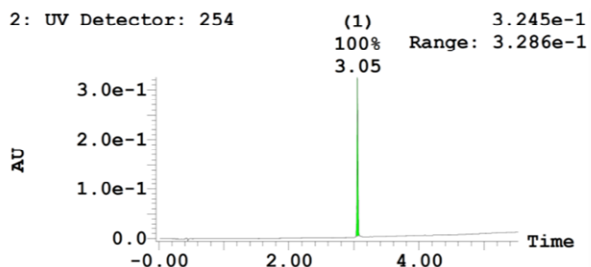

Peak ID 1 Compound Time 3.05 Mass Found

1: MS ES+ 6.4e+006

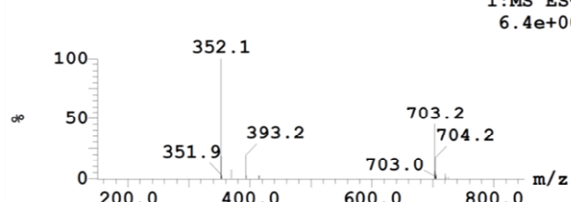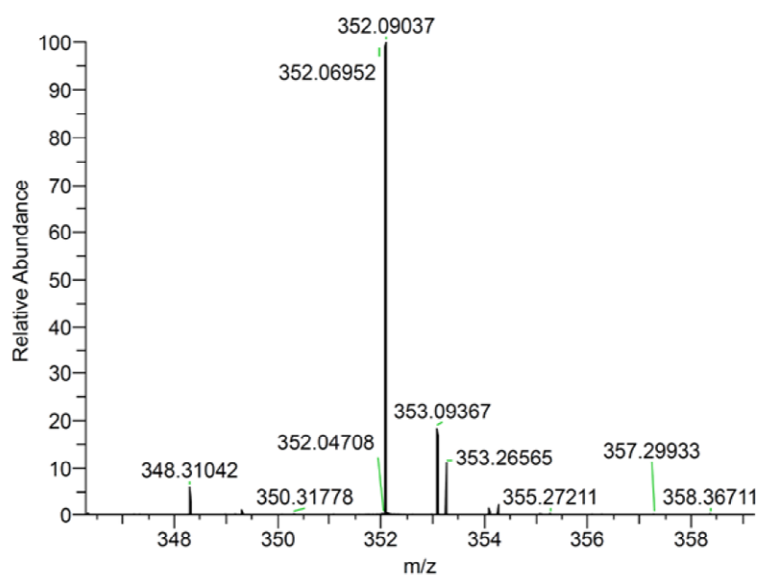

NL: 1.23E7  
ESI74312 #13-27 RT: 0.15-0.31 AV: 8 NL:  
1.23E+007  
T: FTMS {1,1} + p ESI Full ms  
[80.00-1600.00]

Measured Spectrum

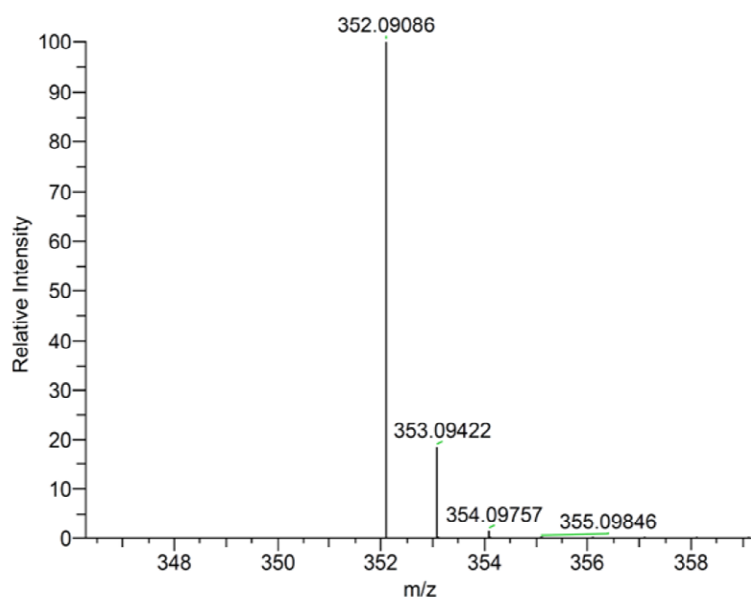

NL: 8.22E5  
C17H17O3N1F2P1: C<sub>17</sub>H<sub>17</sub>O<sub>3</sub>N F<sub>2</sub>P  
Chrg 1 R: 1000000 Res. Pwr. @FWHM

Theoretical Spectrum

| m/z       | Formula                                                          | RDB | Delta ppm | Theo. Mass |
|-----------|------------------------------------------------------------------|-----|-----------|------------|
| 352.09036 | C <sub>17</sub> H <sub>17</sub> O <sub>3</sub> NF <sub>2</sub> P | 9.5 | -1.42     | 352.09086  |

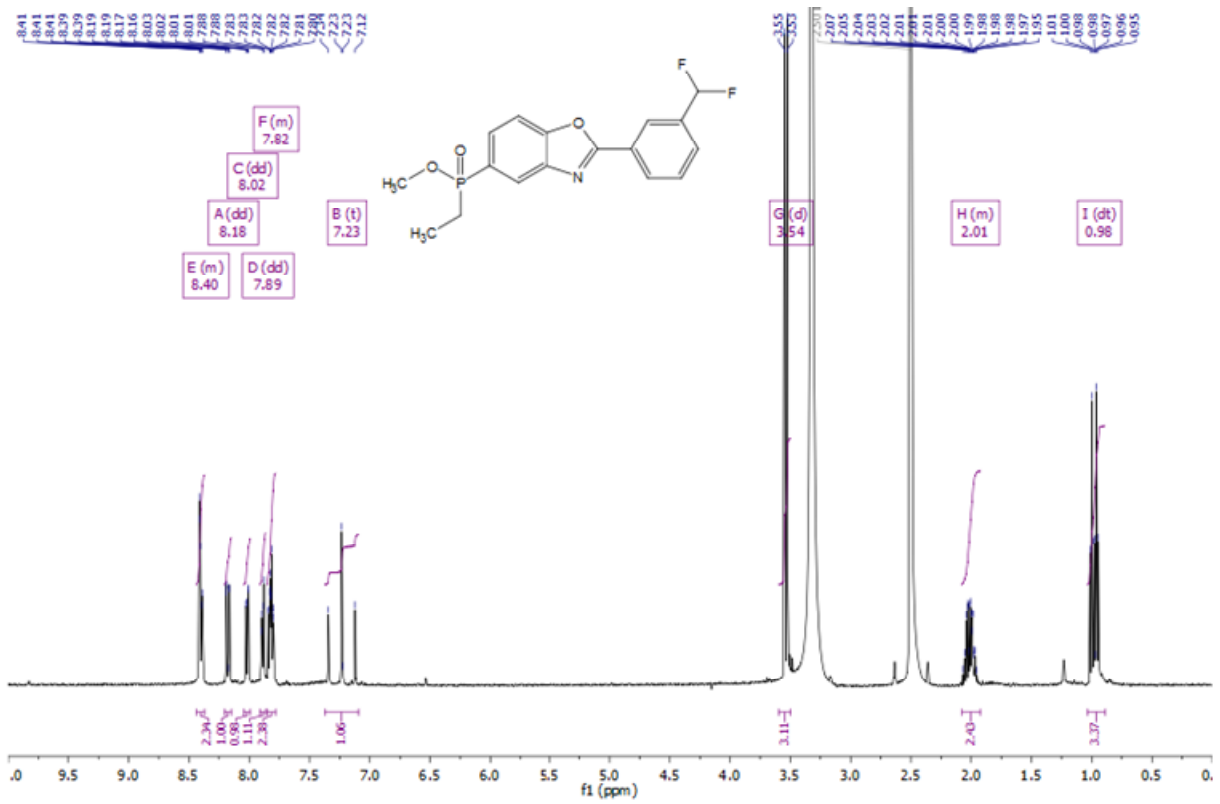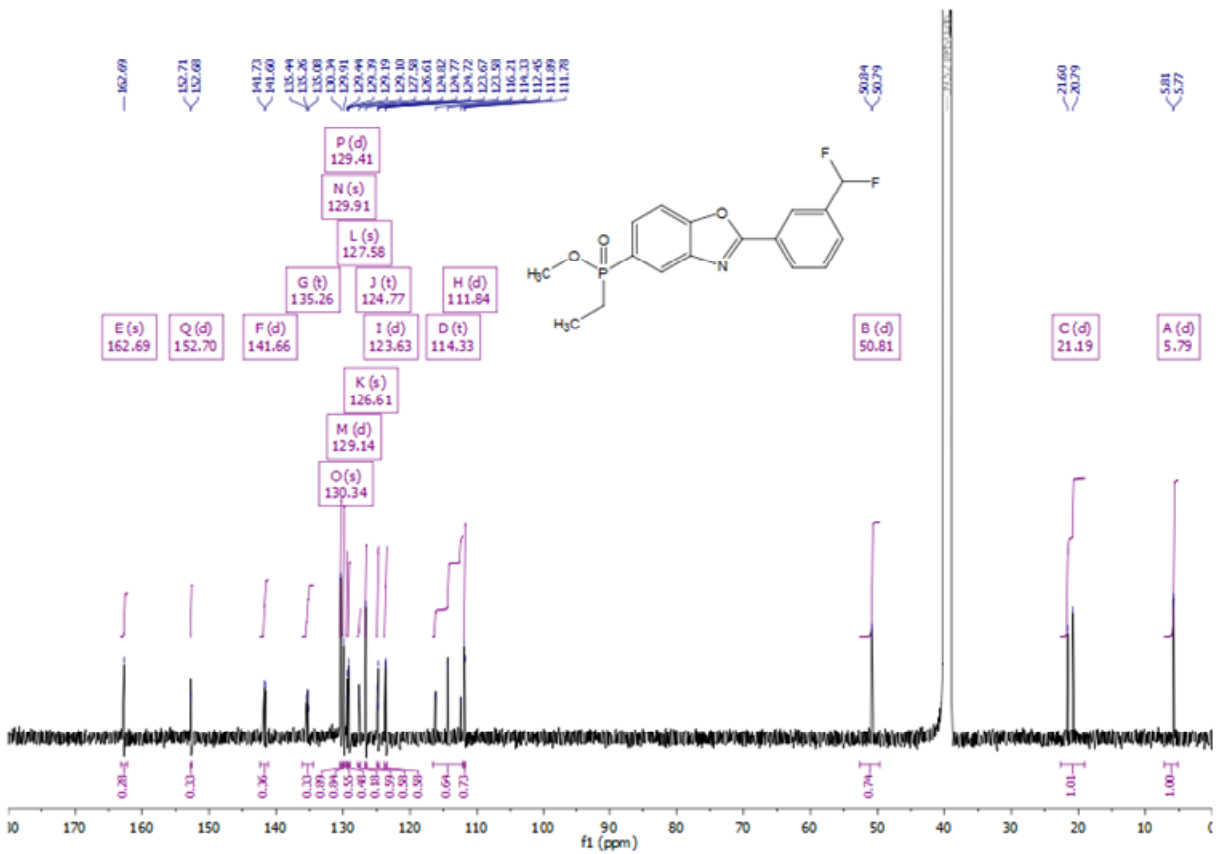

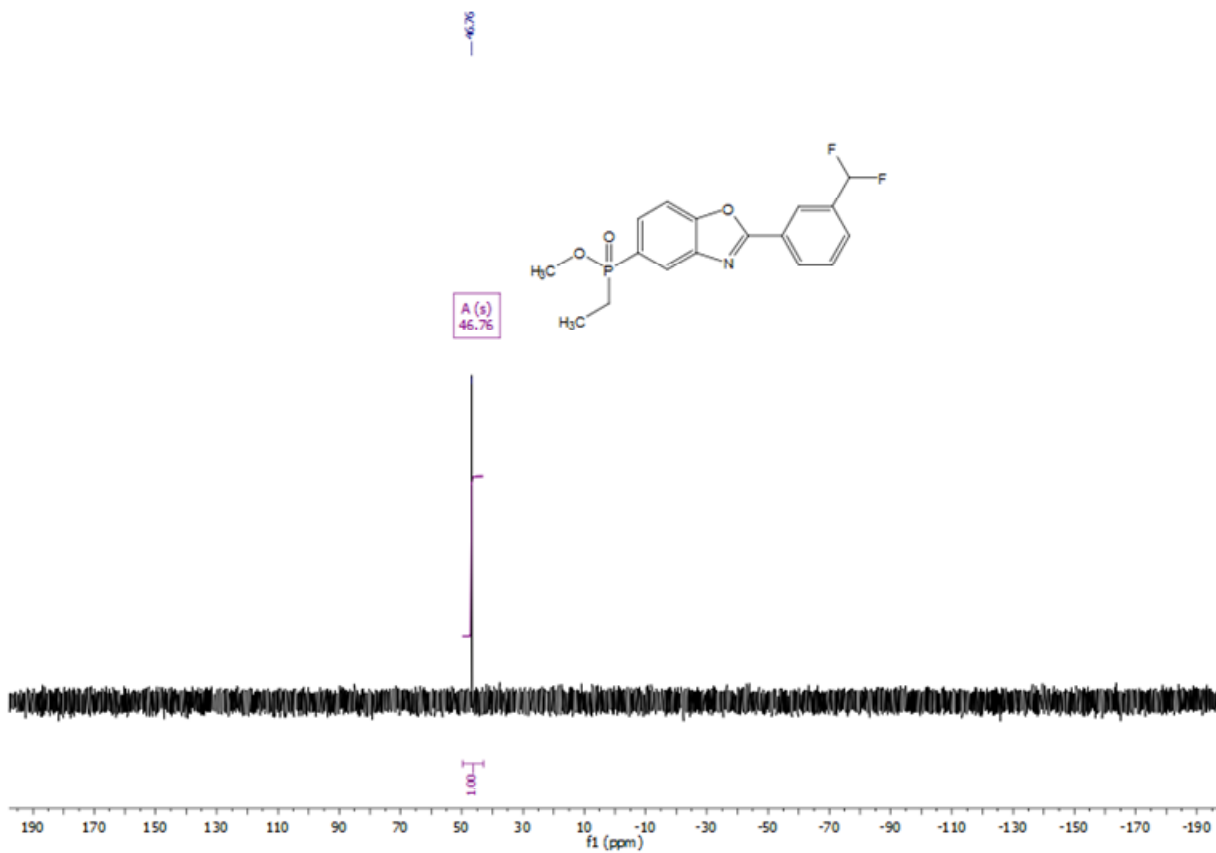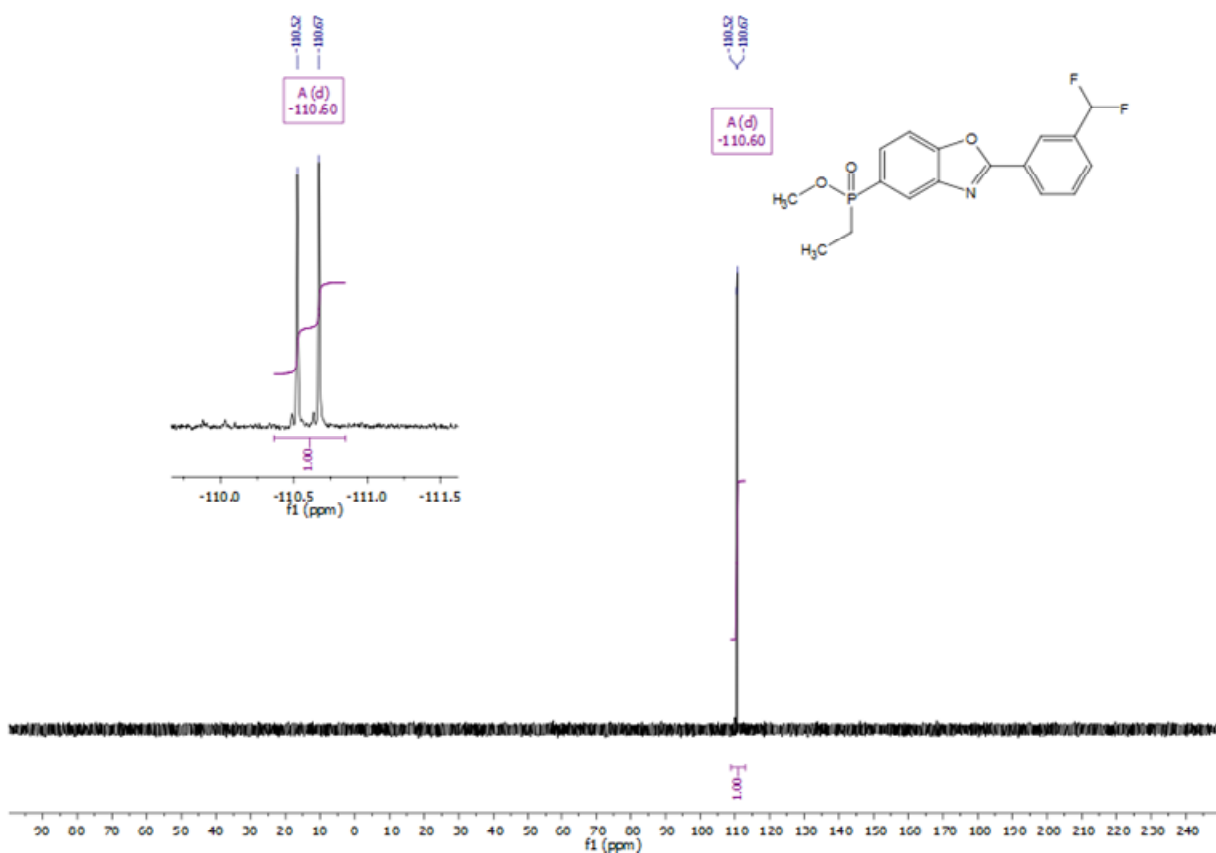

methyl (2-(2-(difluoromethyl)-4-fluorophenyl)benzo[d]oxazol-5-yl)(ethyl)phosphinate (16)

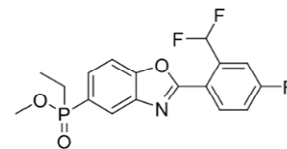

3: UV Detector: 254

(5) 8.607e-1 Peak ID Compound Time Mass Found  
 100% Range: 8.619e-1 5 3.25  
 3.26 5: (Time: 3.25)

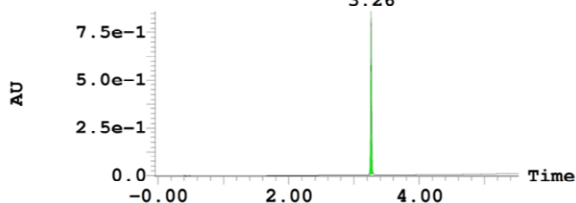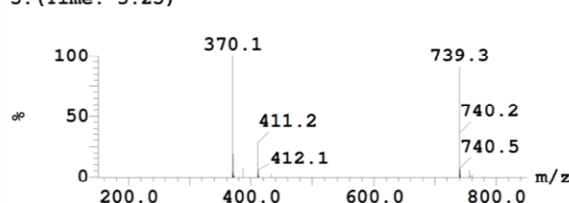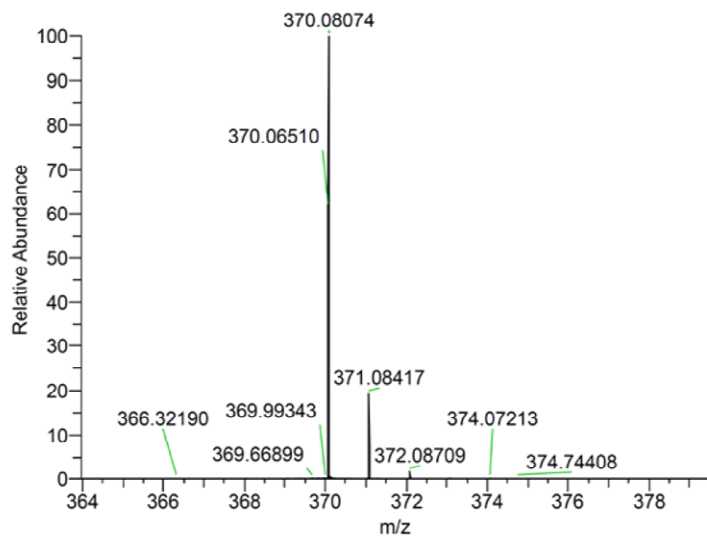

NL: 4.30E7  
 ESI74314 #13-27 RT: 0.15-0.31 AV: 8 NL:  
 4.30E+007  
 T: FTMS {1,1} + p ESI Full ms  
 [80.00-1600.00]

Measured  
 Spectrum

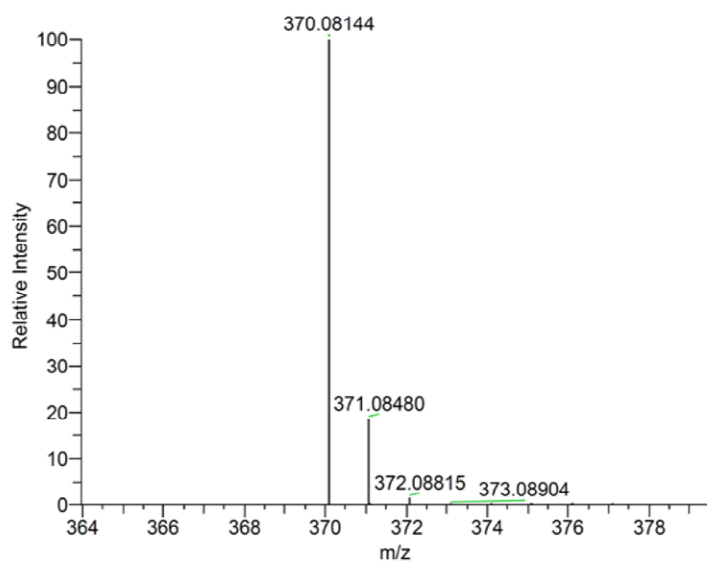

NL: 8.22E5  
 C17H16O3N1F3P1: C17 H16 O3 N F3 P  
 Chrg 1 R: 1000000 Res. Pwr. @FWHM

Theoretical  
 Spectrum

| m/z       | Formula                                                          | RDB | Delta ppm | Theo. Mass |
|-----------|------------------------------------------------------------------|-----|-----------|------------|
| 370.08075 | C <sub>17</sub> H <sub>16</sub> O <sub>3</sub> NF <sub>3</sub> P | 9.5 | -1.87     | 370.08144  |

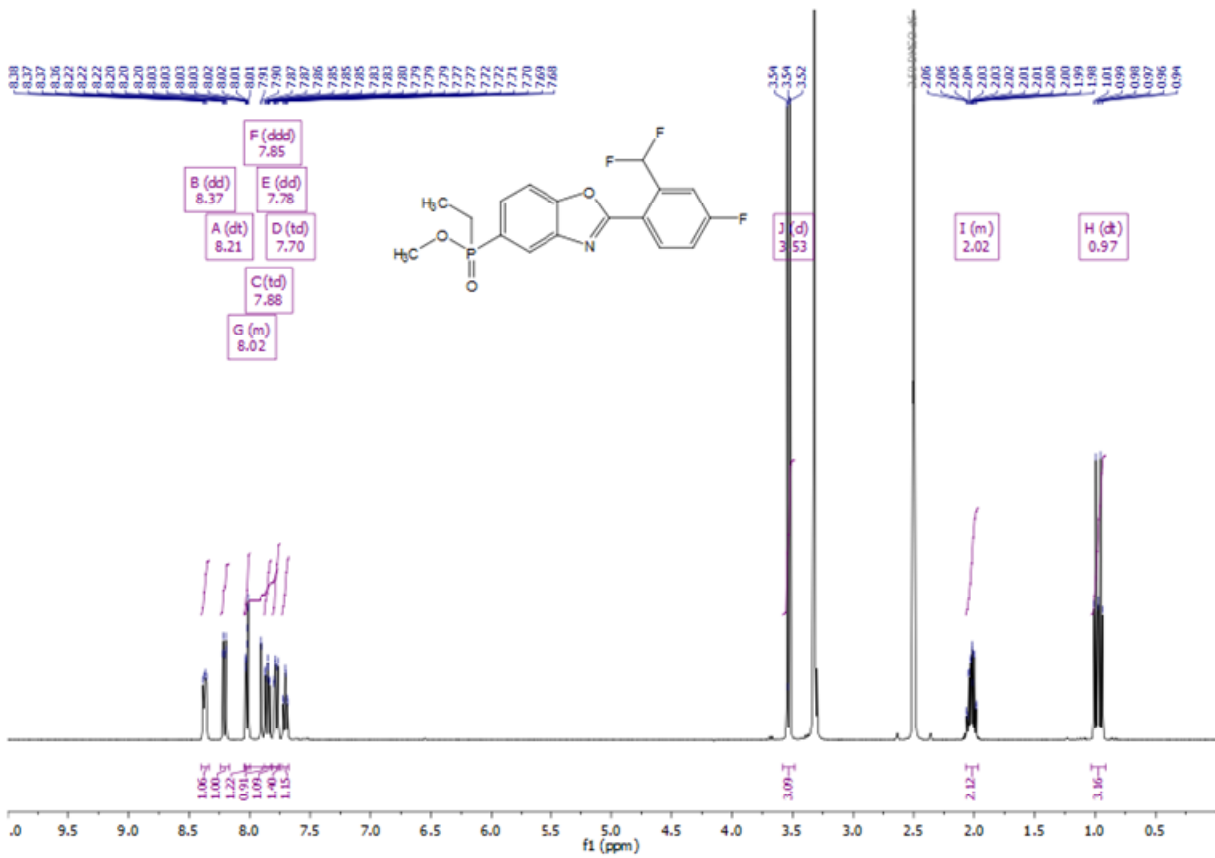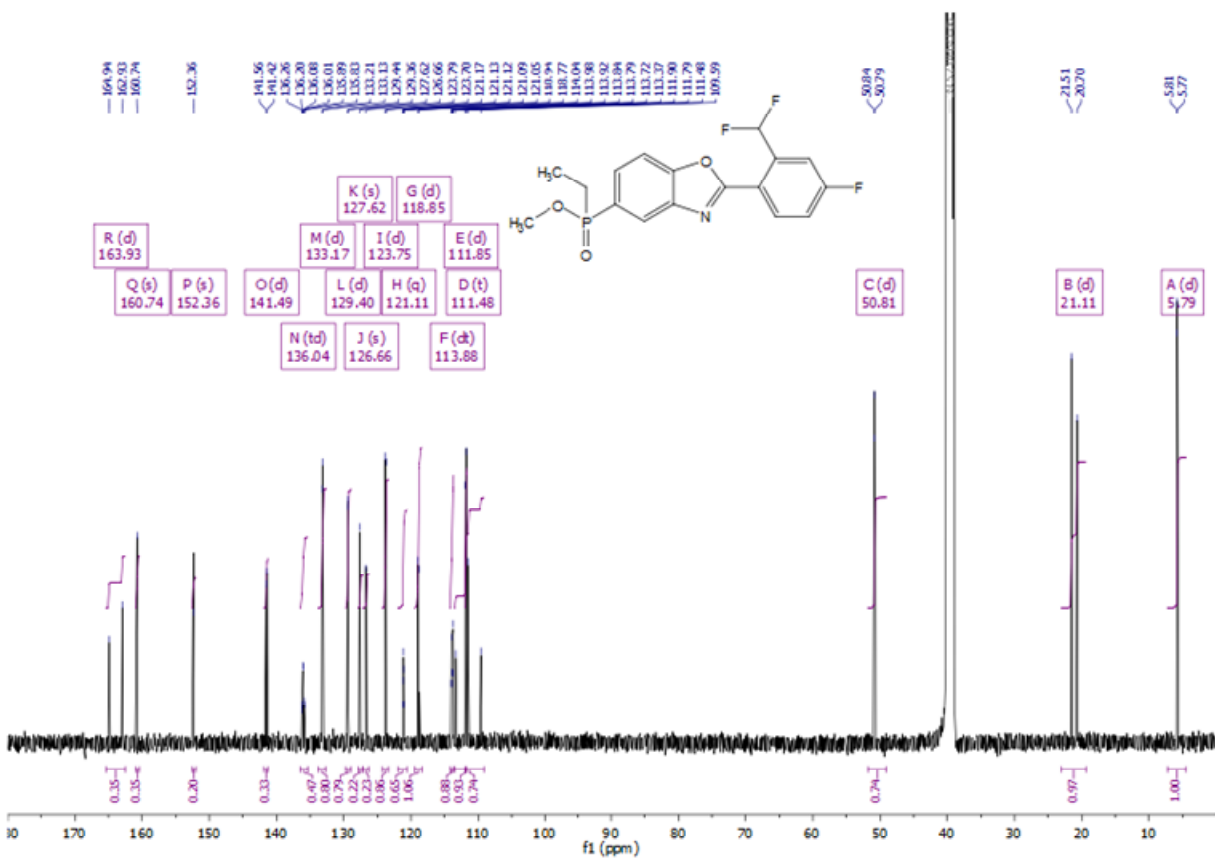



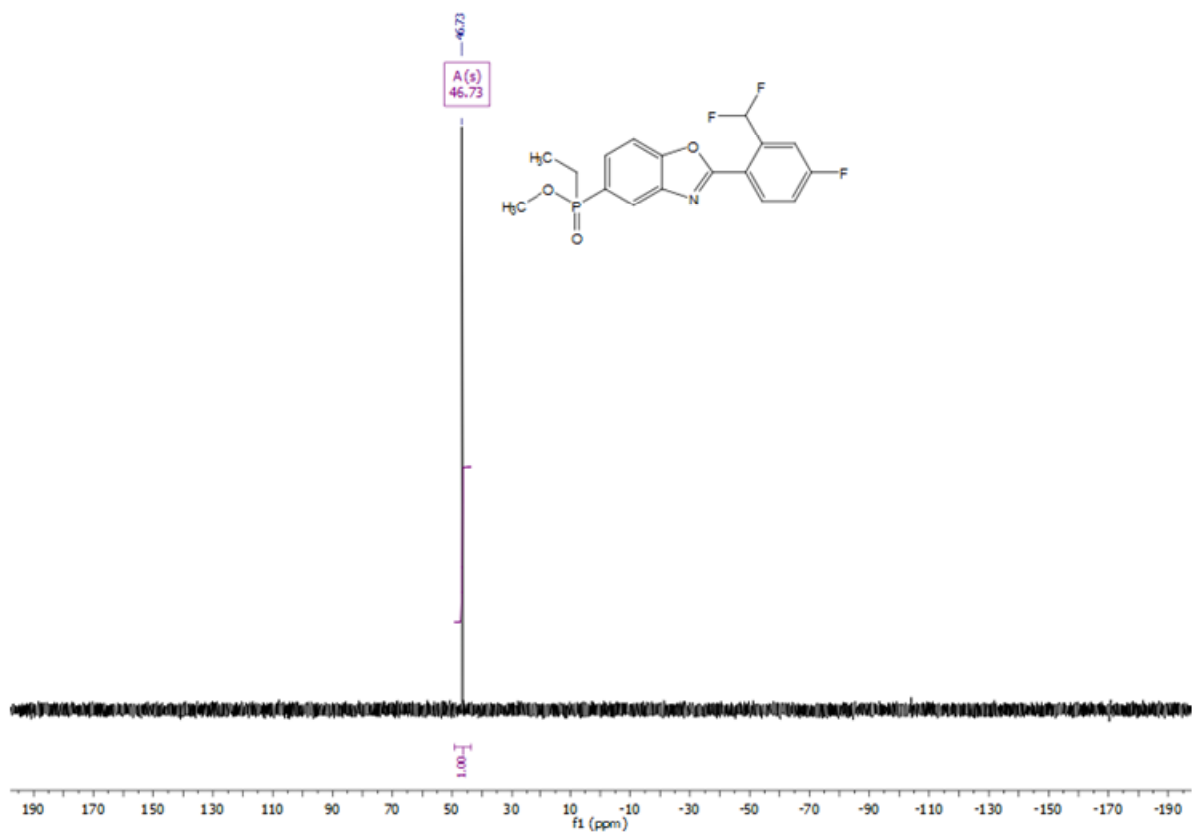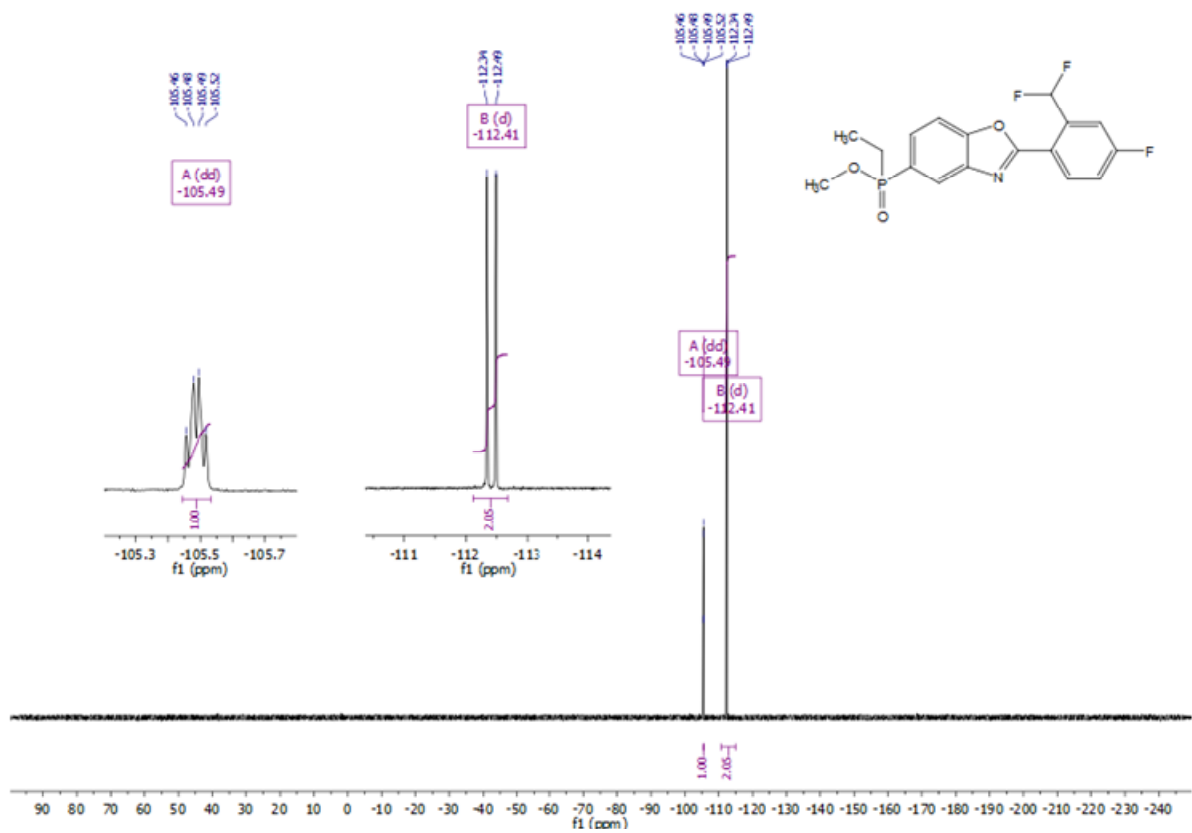

# methyl ethyl(2-(3-methoxyphenyl)benzo[d]oxazol-5-yl)phosphinate (17)

## PDA Chromatogram

1: Wavelength 215 nm, Band Width 4 nm

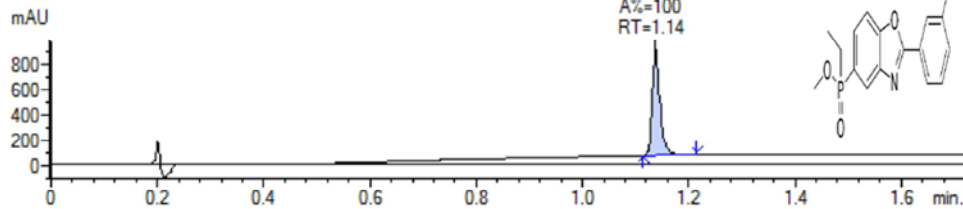

## MS Spectrum

Group#1 - PDA Peak: 5, RT: 1.11 to 1.21 min

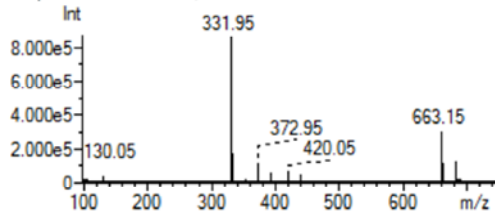

## MS Spectrum

Group#2 - PDA Peak: 5, RT: 1.11 to 1.21 min

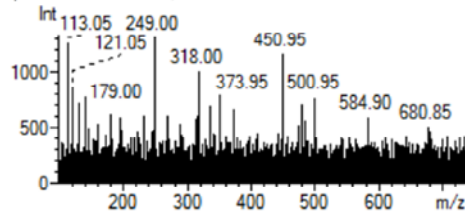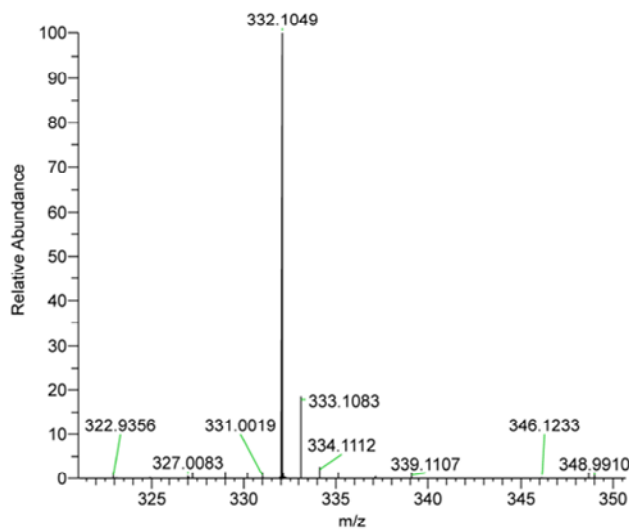

NL: 2.05E7  
ESI76999 #15 RT: 0.17 AV: 1 NL:  
6.68E+007  
T: FTMS (1.1) + p ESI Full lock ms  
[80.00-1600.00]

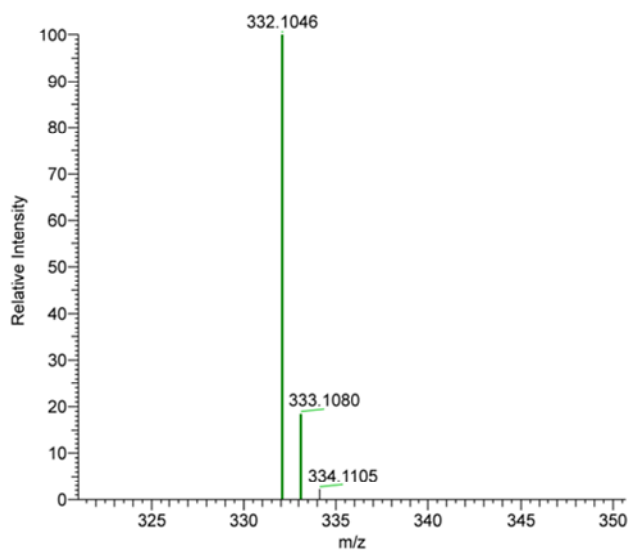

NL: 8.20E5  
C17H19O4NP Chrg 1 R: 4480 Res. Pwr.  
@FWHM

Theoretical Spectrum

| Peak Mass Display... | Combin...                           | RDB       | Delta [p... | Theo. m... | Rank      | Combin... | # Match... | # Misse... | MS Cov... | Pattern... | MSMS...              |
|----------------------|-------------------------------------|-----------|-------------|------------|-----------|-----------|------------|------------|-----------|------------|----------------------|
| 332.1049             | C <sub>17</sub> H <sub>19</sub> ... | 27.901... | 9.50        | 0.99       | 332.10... | 1         | 94.988...  | 4          | 0         | 98.715...  | 97.907... (Collec... |

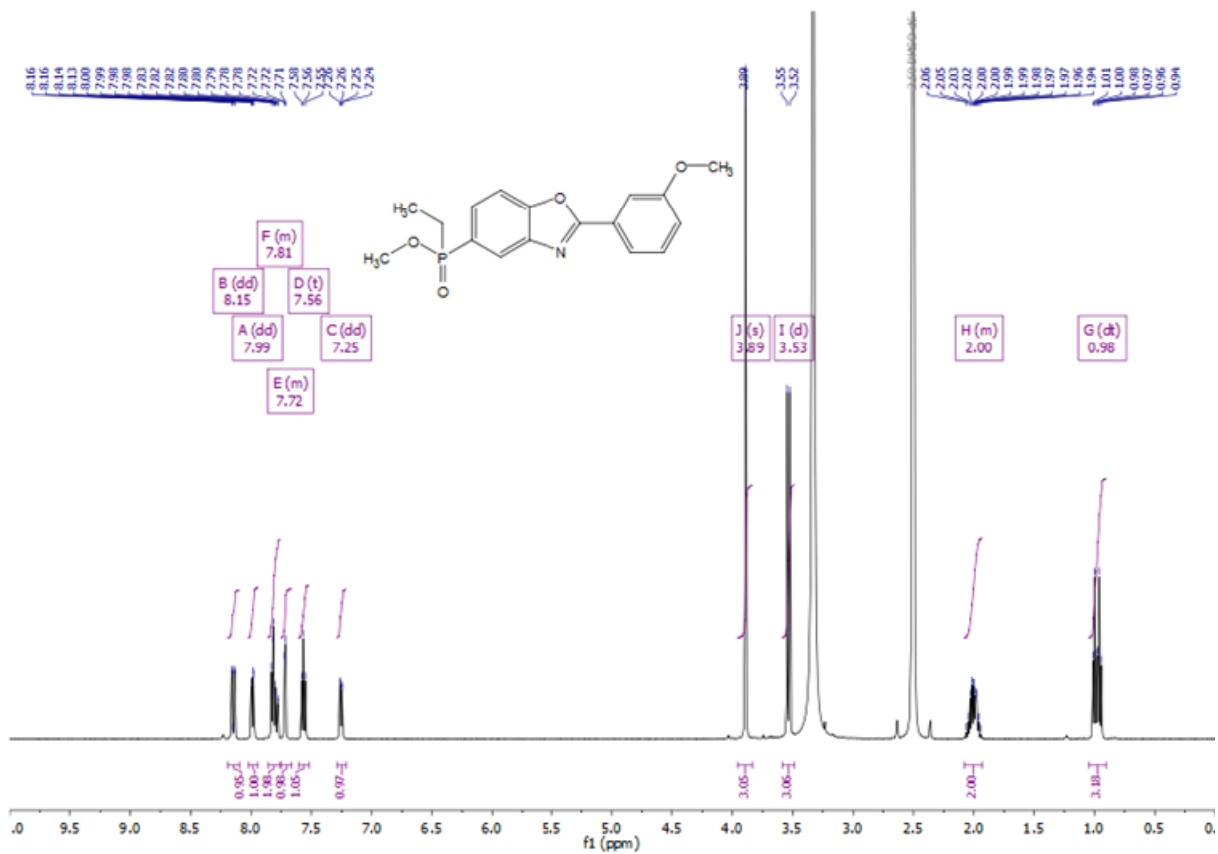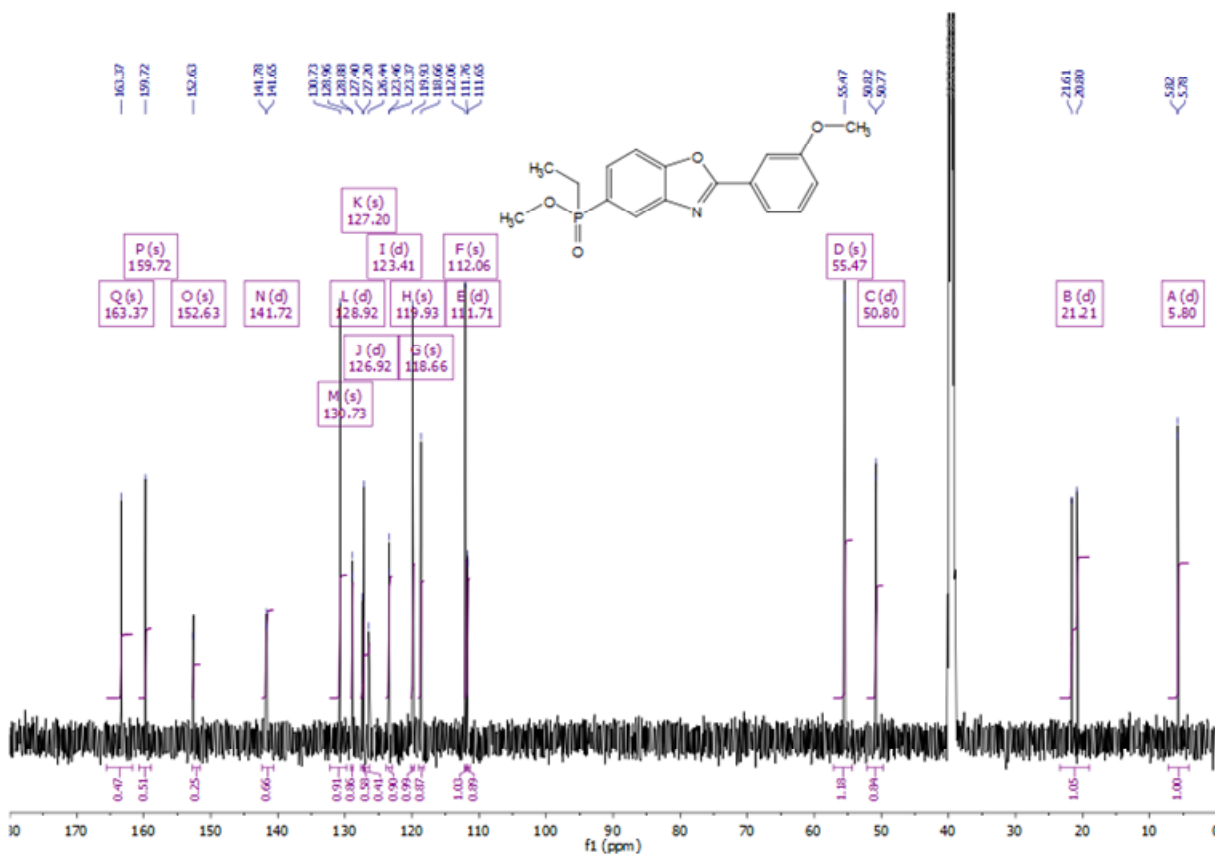

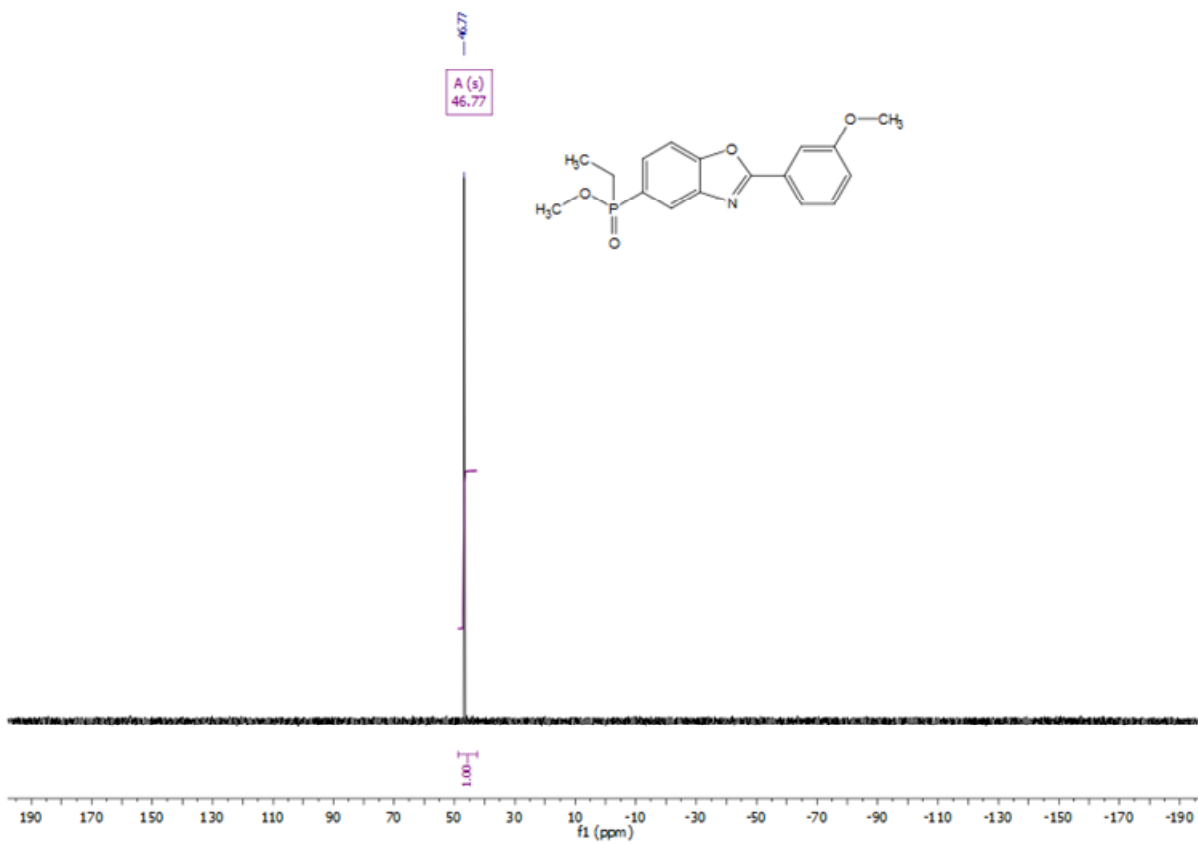

**methyl (2-(2-(difluoromethoxy)phenyl)benzo[d]oxazol-5-yl)(ethyl)phosphinate (18)**

**PDA Chromatogram**

1: Wavelength 215 nm, Band Width 4 nm

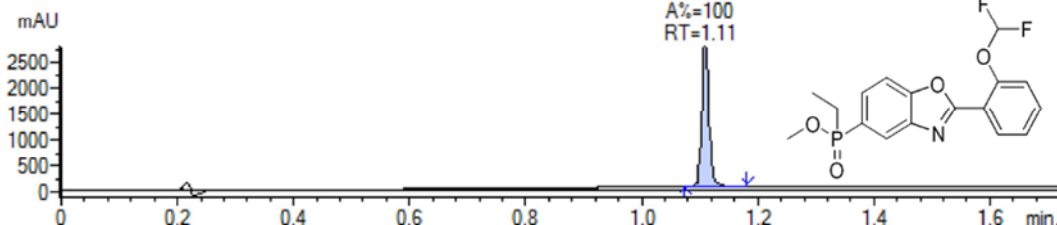

**MS Spectrum**

Group#1 - PDA Peak: 5, RT: 1.08 to 1.18 min

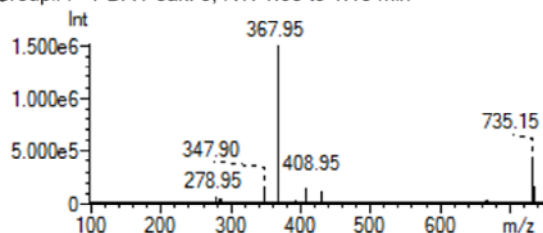

**MS Spectrum**

Group#2 - PDA Peak: 5, RT: 1.08 to 1.18 min

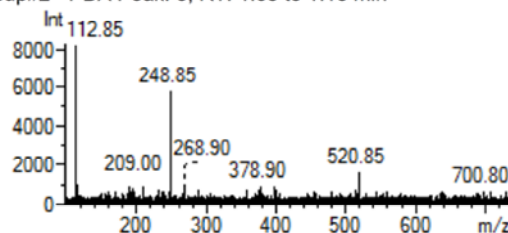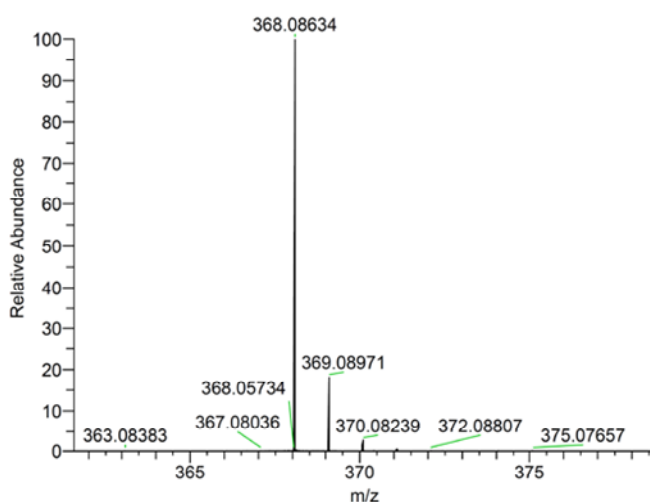

NL: 6.93E7  
ESI74320 #13-27 RT: 0.15-0.31 AV: 8 NL:  
6.93E+007  
T: FTMS (1.1) + p ESI Full ms  
[80.00-1600.00]

**Measured  
Spectrum**

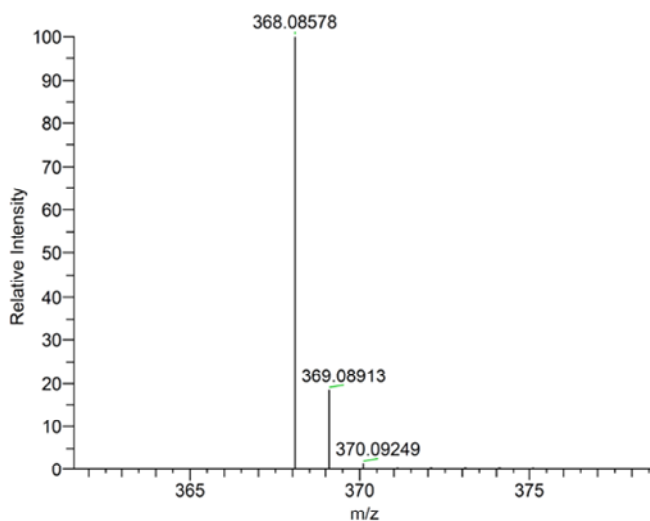

NL: 8.20E5  
C17H17O4N1F2P1: C<sub>17</sub> H<sub>17</sub> O<sub>4</sub> N F<sub>2</sub> P  
Chrg 1 R: 1000000 Res. Pwr. @FWHM

**Theoretical  
Spectrum**

| m/z       | Formula                                                          | RDB | Delta ppm | Theo. Mass |
|-----------|------------------------------------------------------------------|-----|-----------|------------|
| 368.08633 | C <sub>17</sub> H <sub>17</sub> O <sub>4</sub> NF <sub>2</sub> P | 9.5 | 1.51      | 368.08578  |

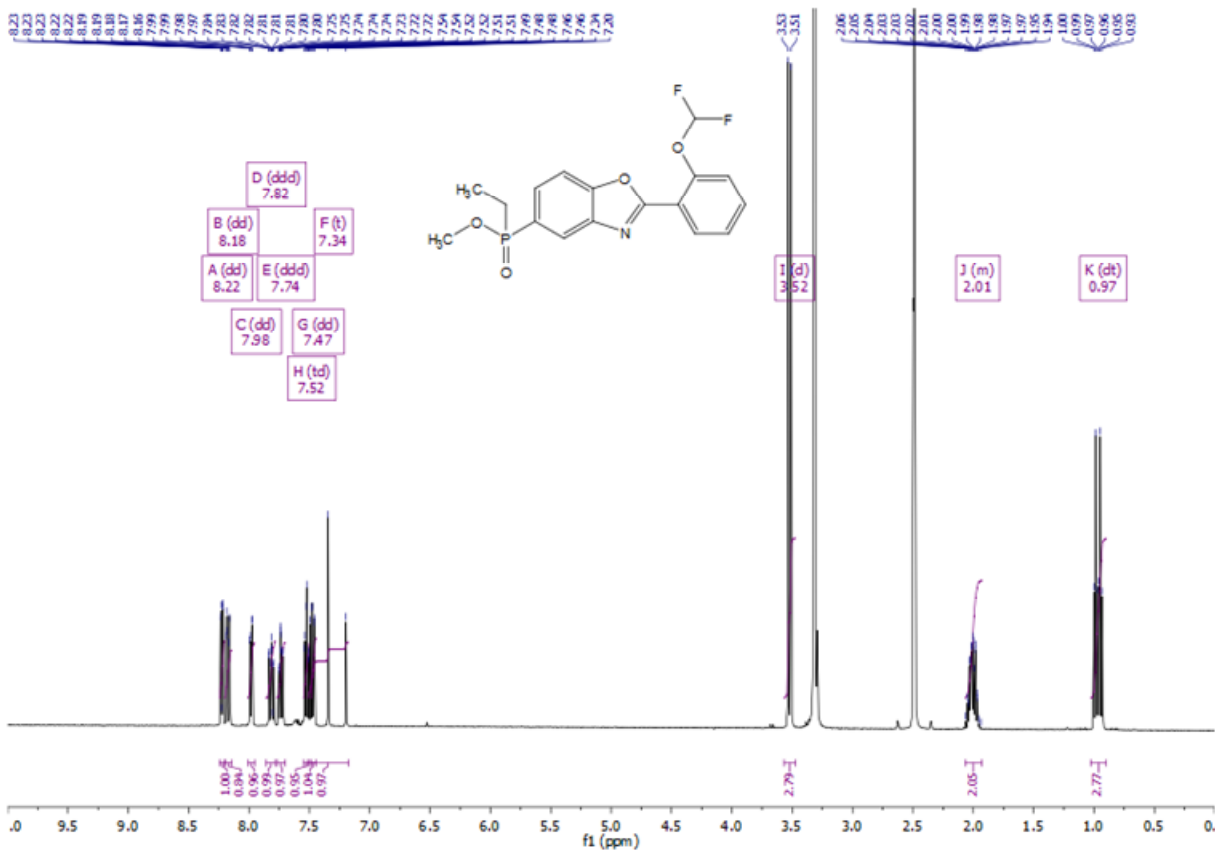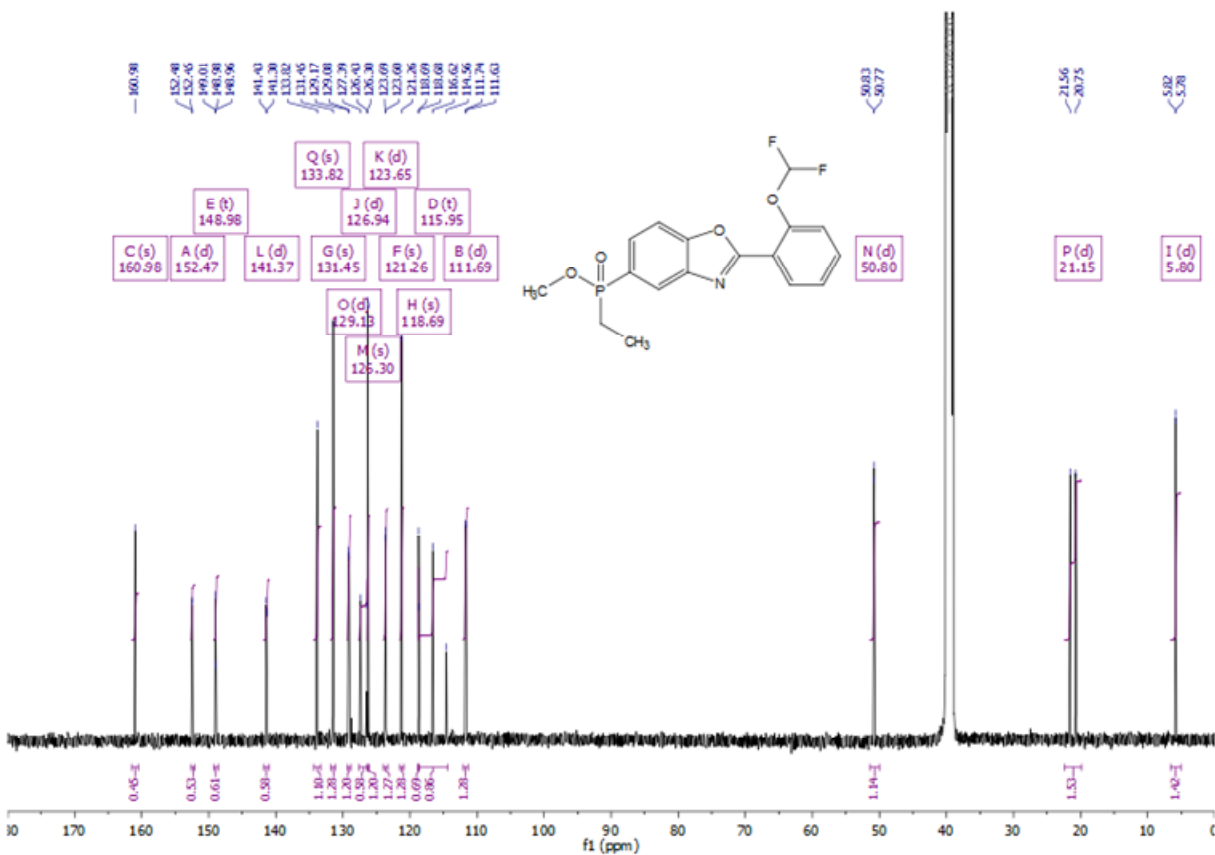

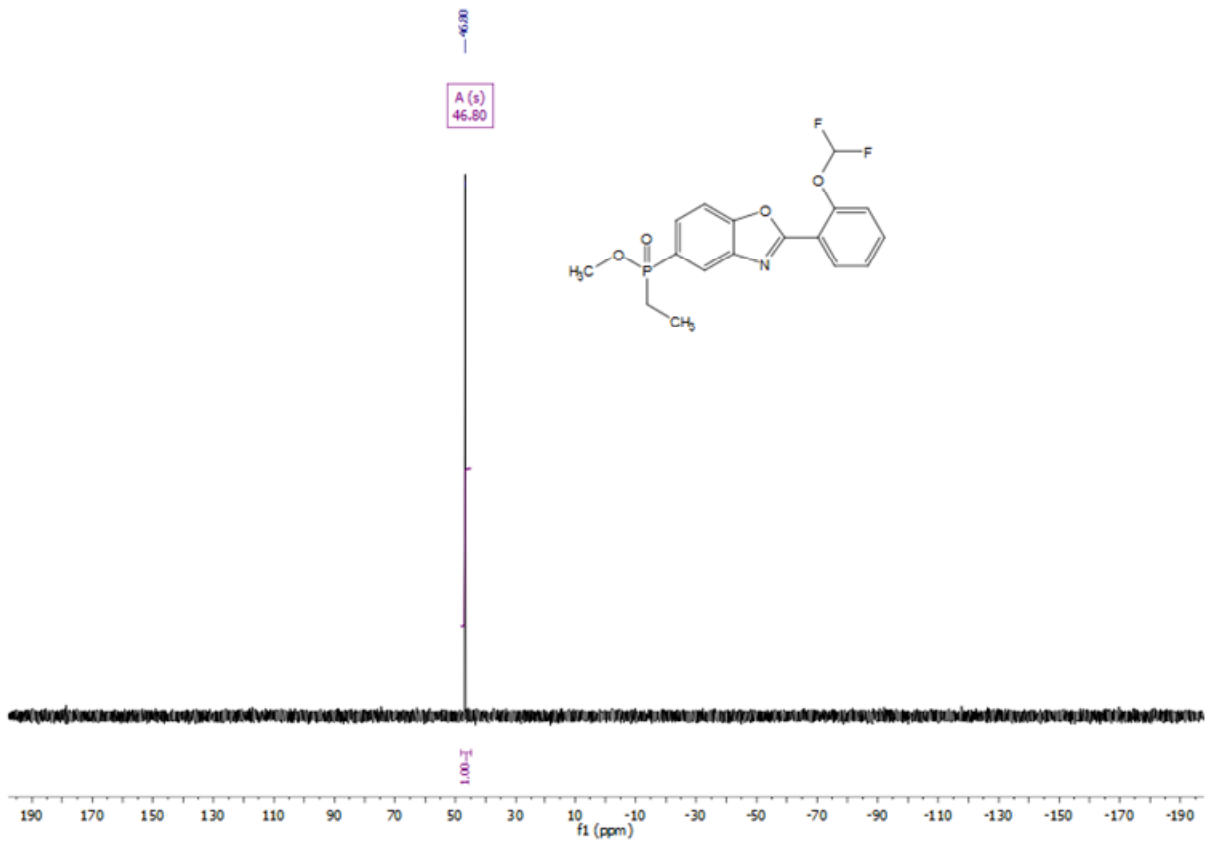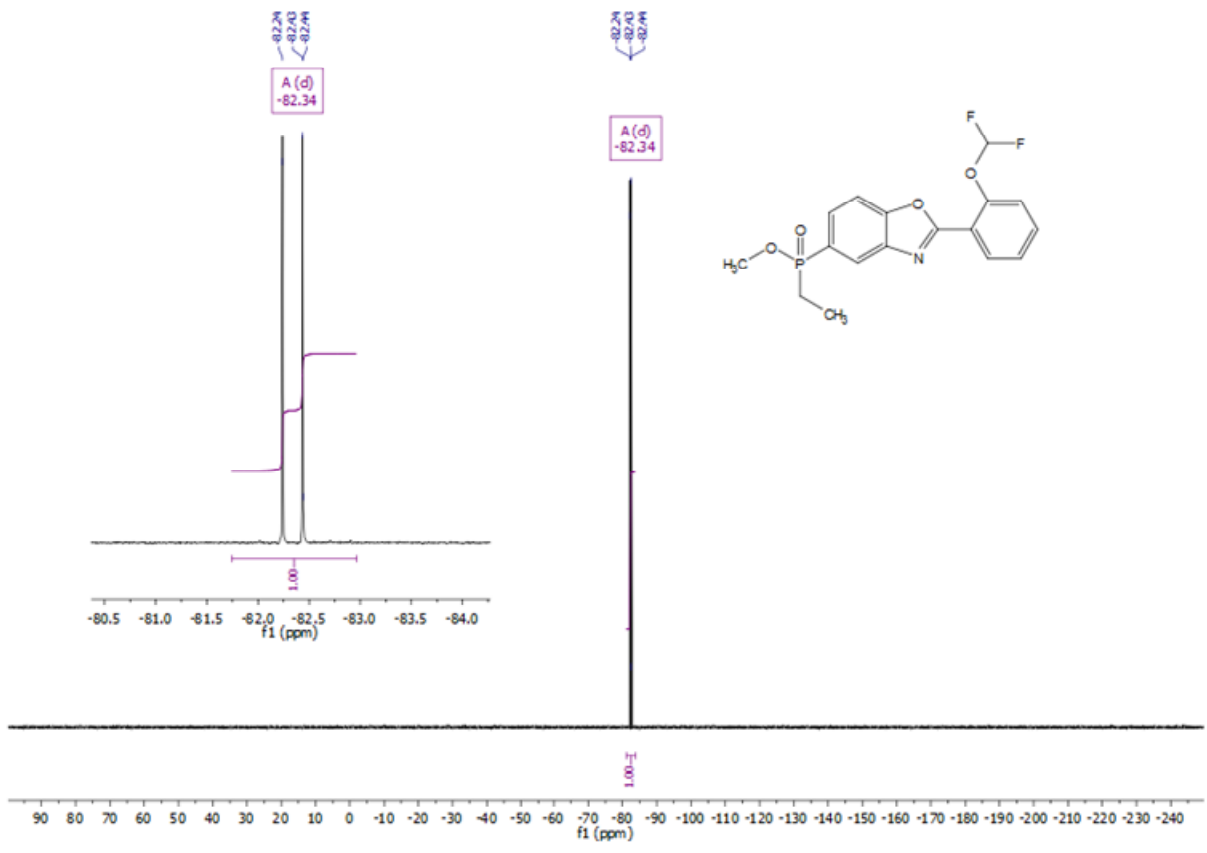

methyl (2-(2,2-difluorobenzo[d][1,3]dioxol-5-yl)benzo[d]oxazol-5-yl)(ethyl)phosphinate (19)

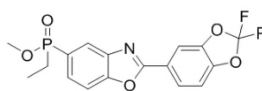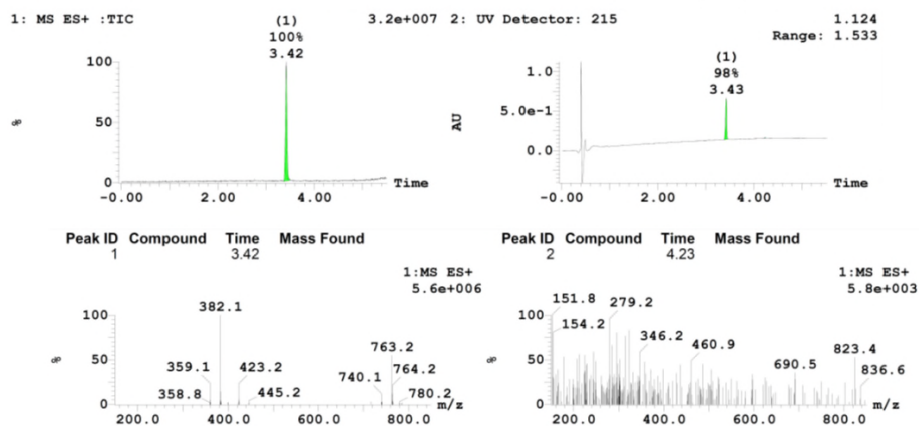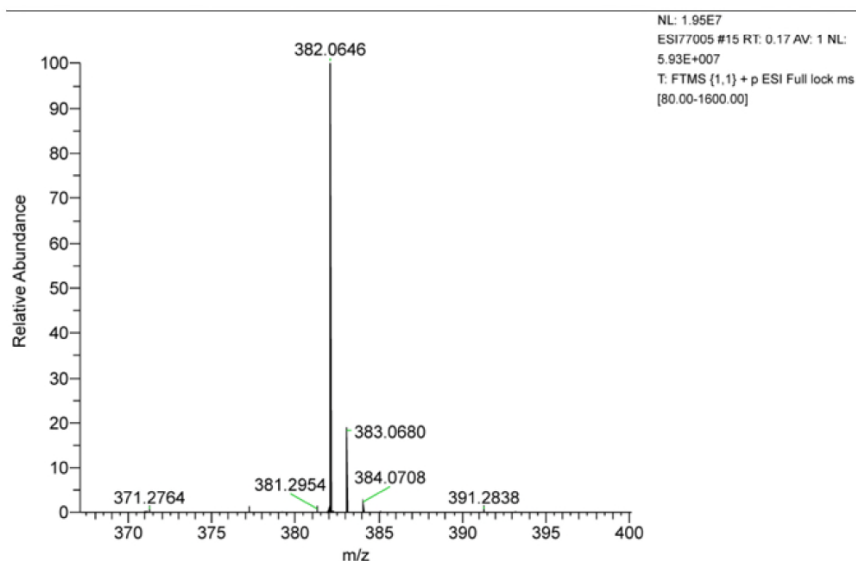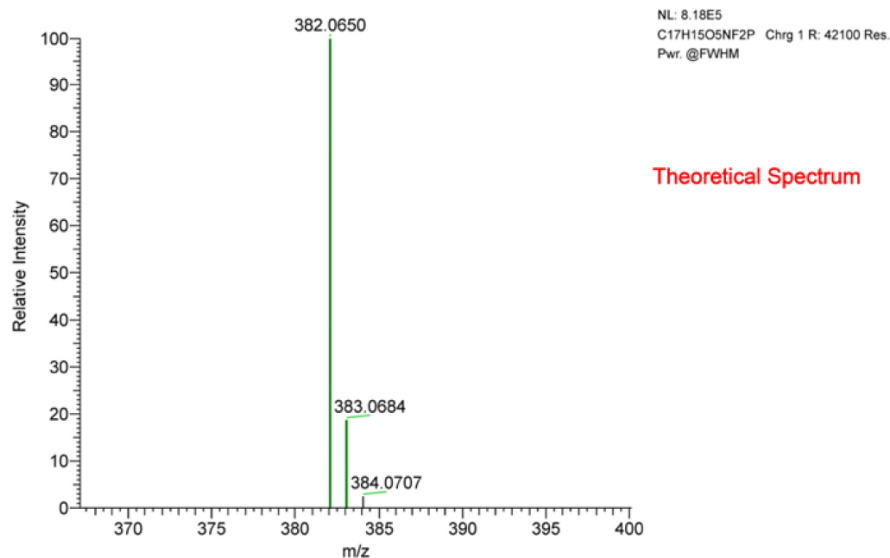

| Peak Mass Display... | Combin...                           | RDB       | Delta [p... | Theo. m... | Rank      | Combin... | # Match... | # Misse... | MS Cov... | Pattern... | MSMS...              |
|----------------------|-------------------------------------|-----------|-------------|------------|-----------|-----------|------------|------------|-----------|------------|----------------------|
| 382.0646             | C <sub>17</sub> H <sub>15</sub> ... | 28.139... | 10.50       | -1.22      | 382.06... | 1         | 94.666...  | 4          | 0         | 98.362...  | 97.668... (Collec... |



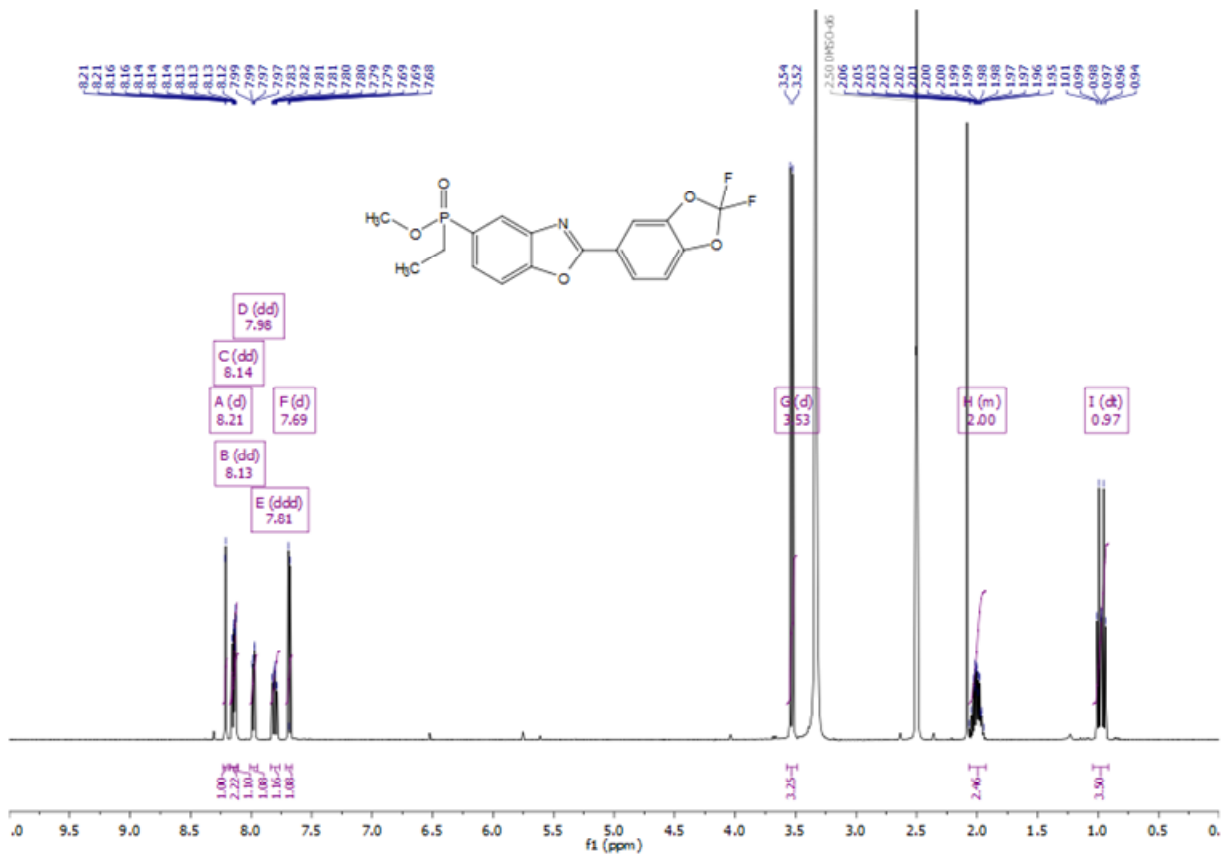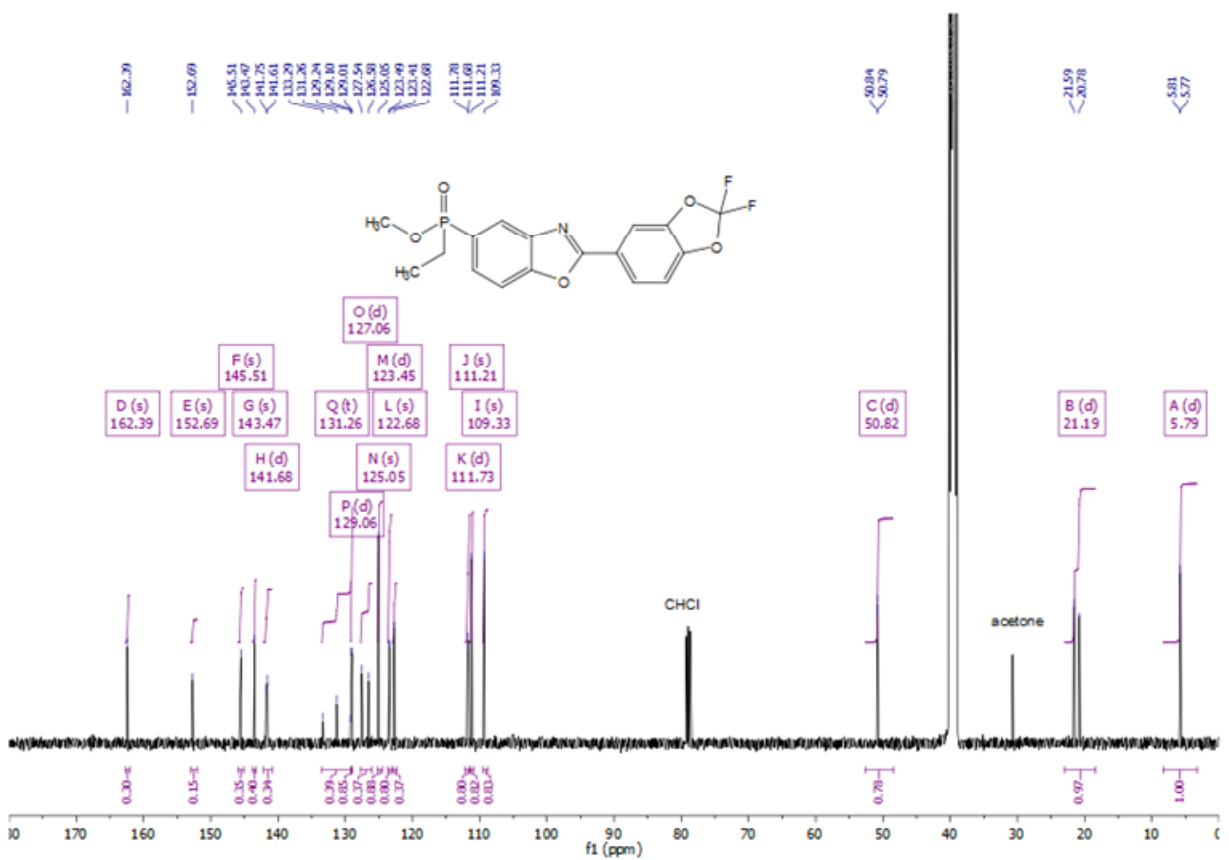

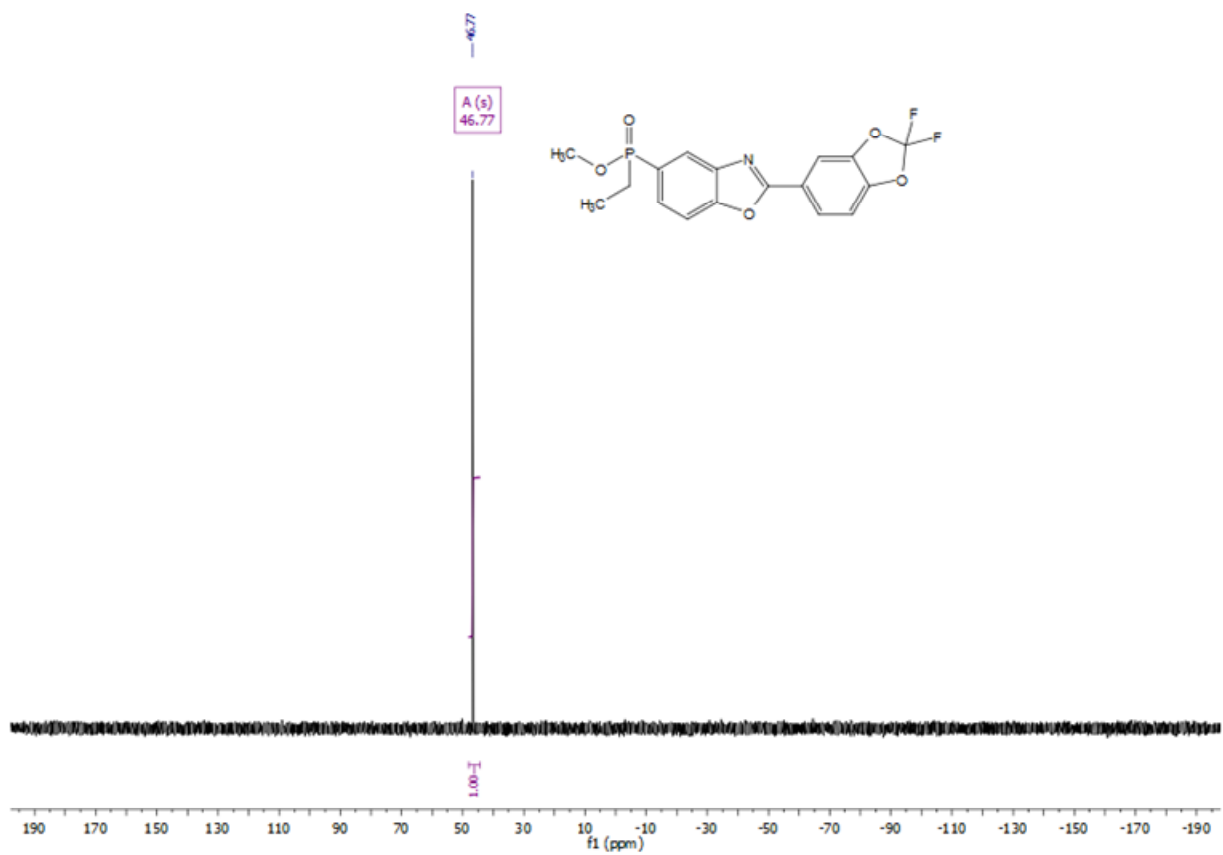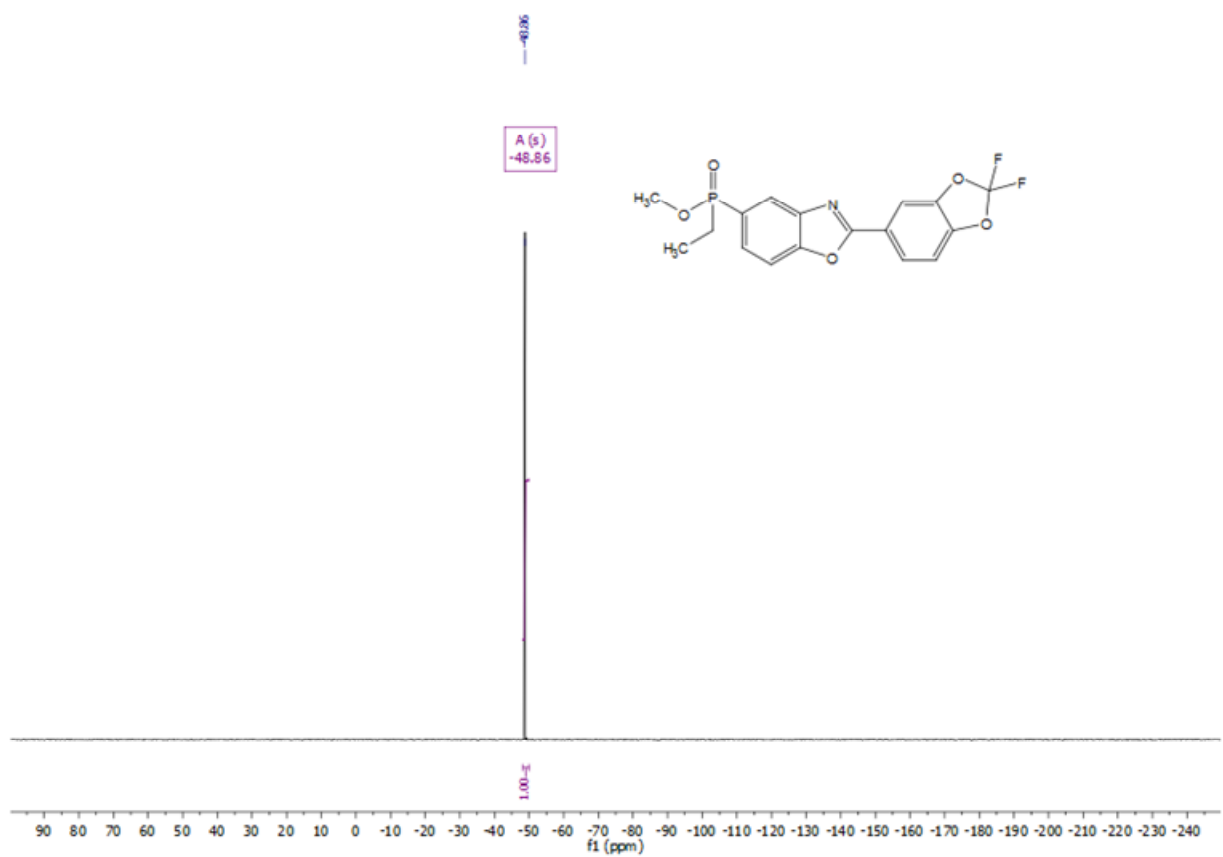

**methyl (2-(2-(difluoromethoxy)pyridin-4-yl)benzo[d]oxazol-5-yl)(ethyl)phosphinate (20)**

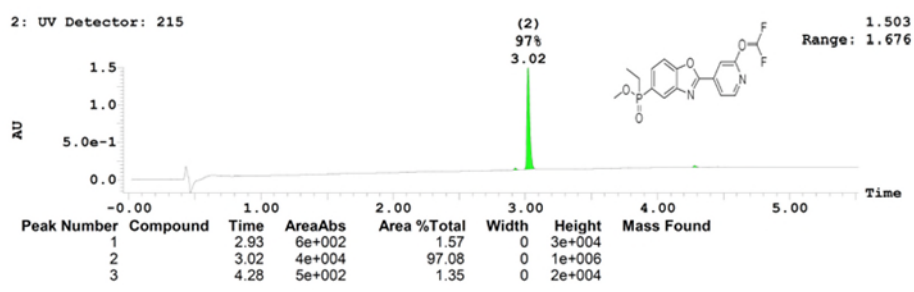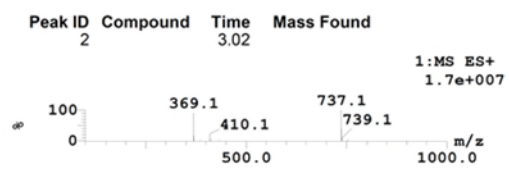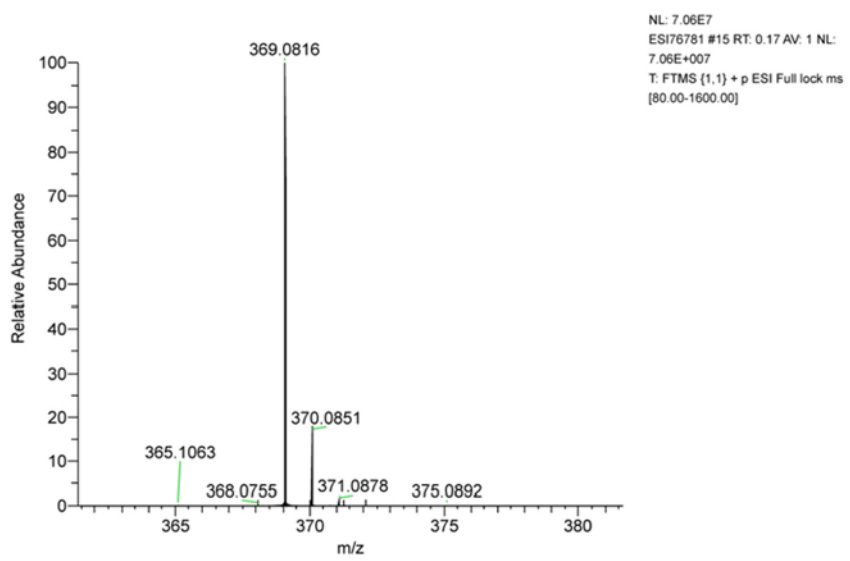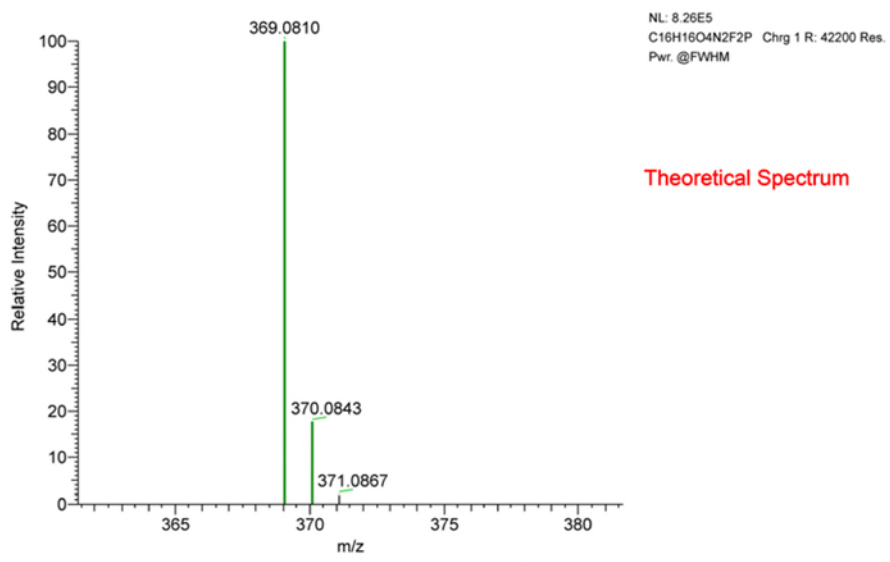

| Peak Mass Display... | Combin...                           | RDB       | Delta [p... | Theo. m... | Rank      | Combin... | # Match... | # Misse... | MS Cov... | Pattern... | MSMS...              |
|----------------------|-------------------------------------|-----------|-------------|------------|-----------|-----------|------------|------------|-----------|------------|----------------------|
| 369.0816             | C <sub>16</sub> H <sub>16</sub> ... | 26.855... | 9.50        | 1.48       | 369.08... | 1         | 94.843...  | 4          | 0         | 98.620...  | 97.992... (Collec... |

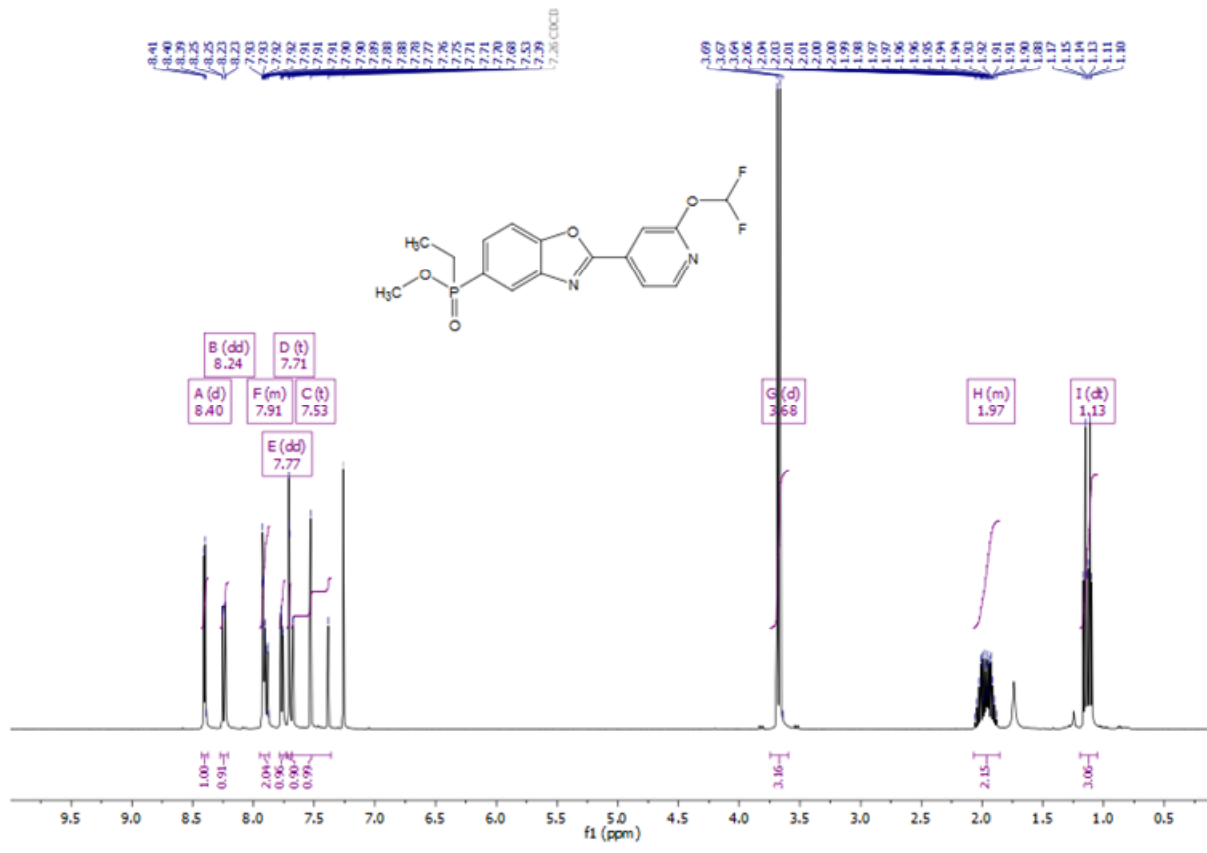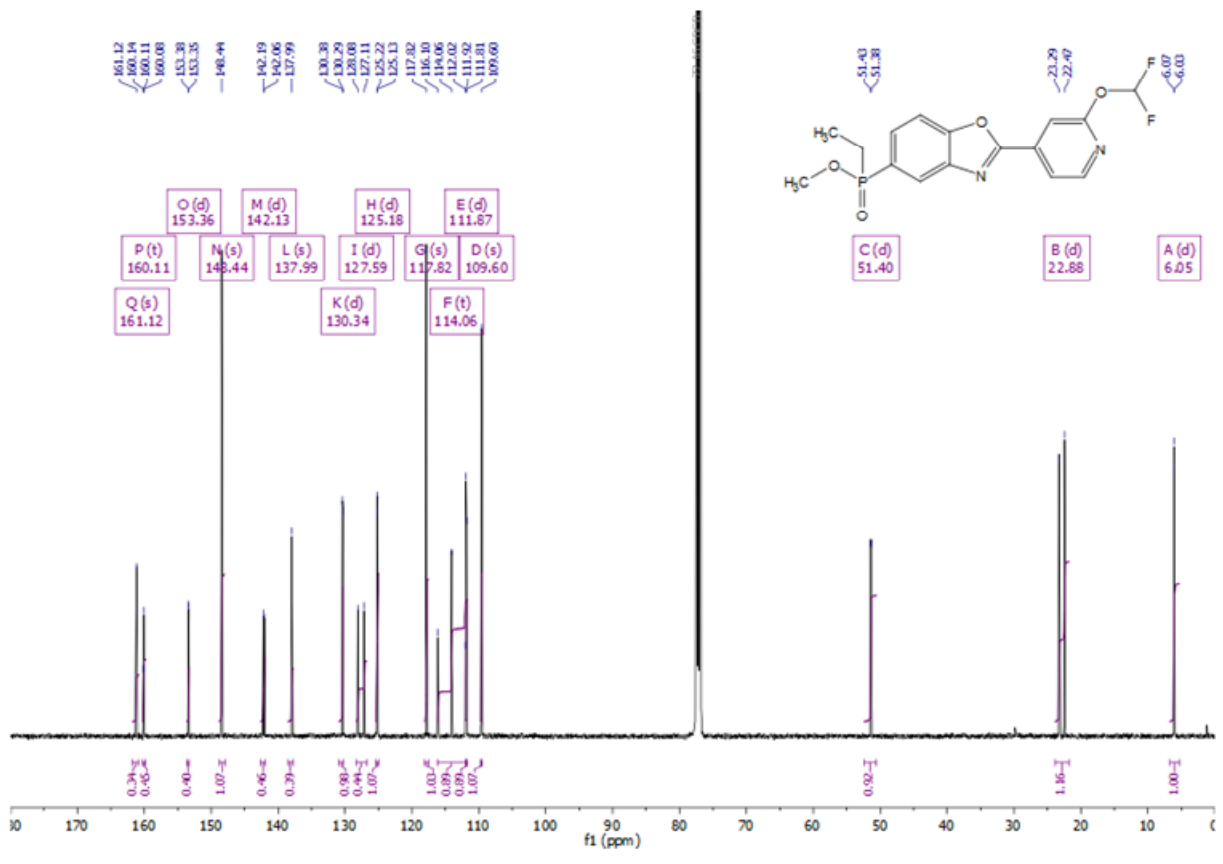

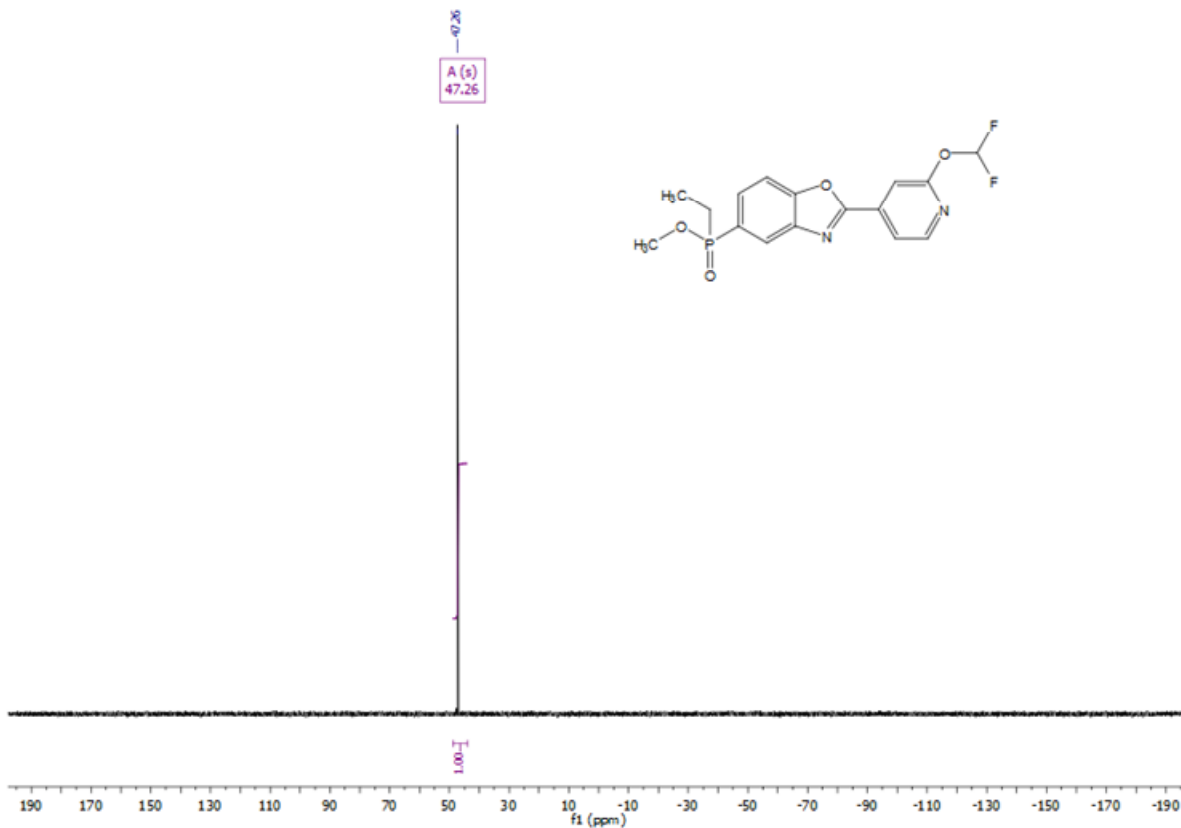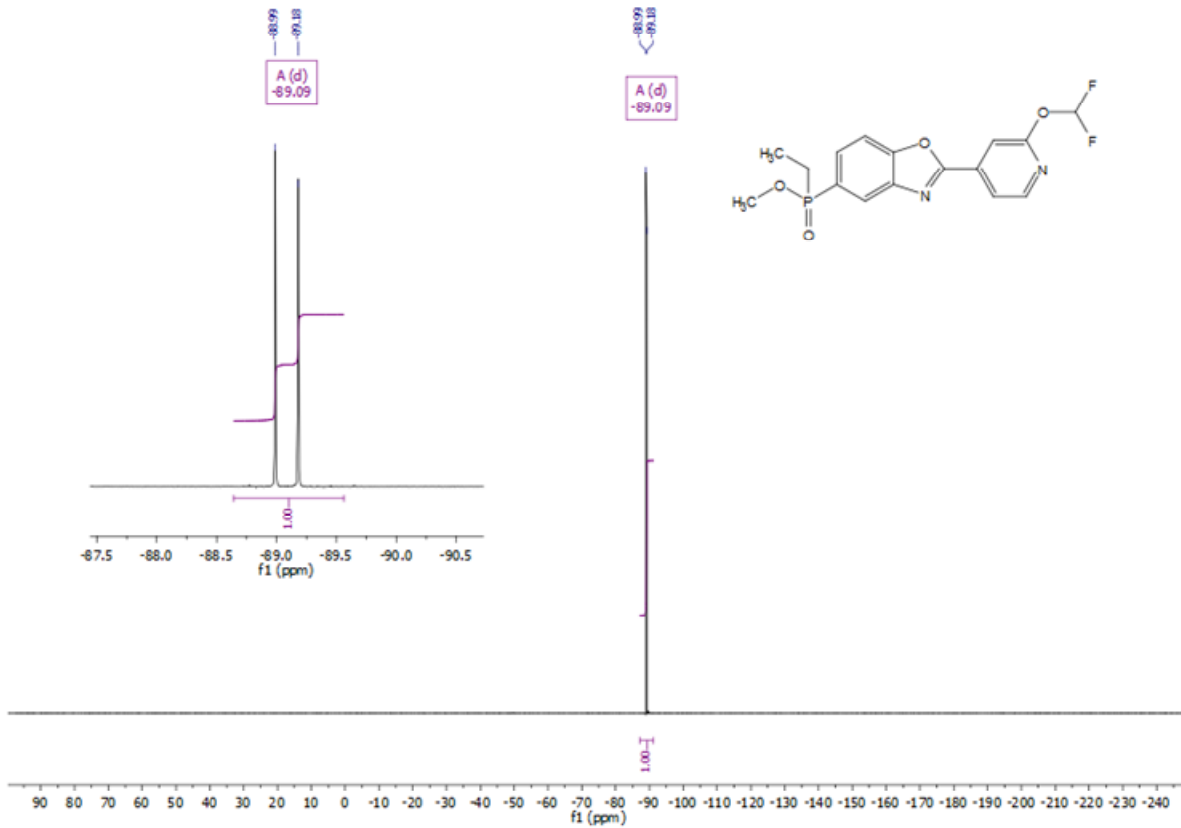

# methyl ethyl(2-(5-(trifluoromethyl)pyridin-3-yl)benzo[d]oxazol-5-yl)phosphinate (21)

## PDA Chromatogram

1: Wavelength 215 nm, Band Width 4 nm

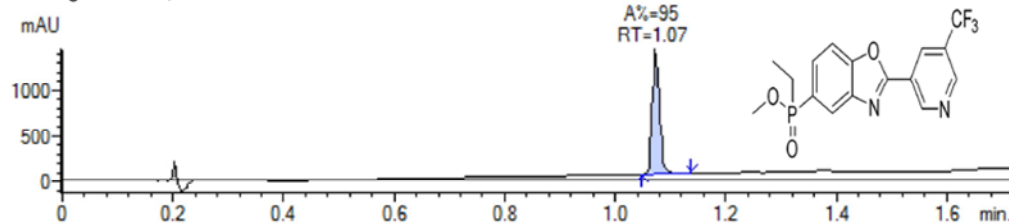

## MS Spectrum

Group#1 - PDA Peak: 4, RT: 1.05 to 1.14 min

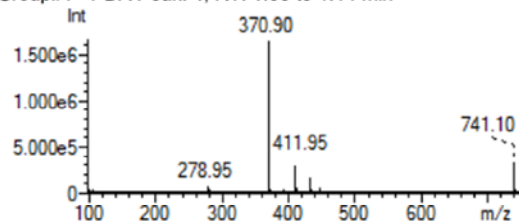

## MS Spectrum

Group#2 - PDA Peak: 4, RT: 1.05 to 1.14 min

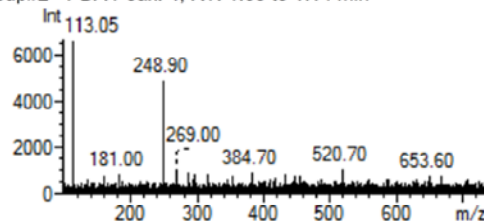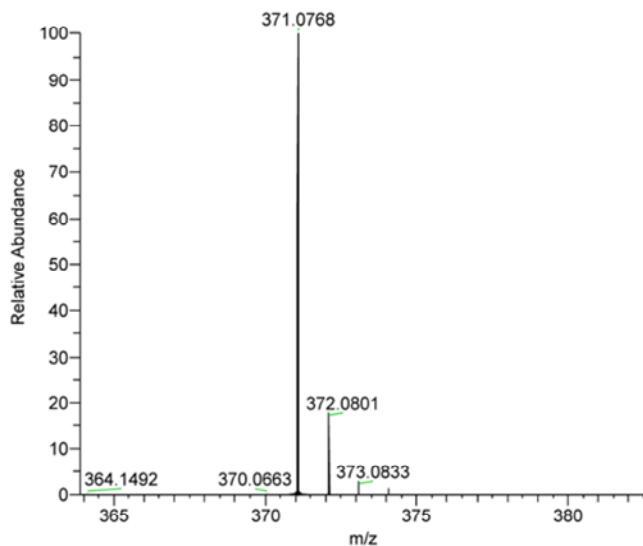

NL: 2.00E7  
ESI77001 #15 RT: 0.17 AV: 1 NL:  
6.69E+007  
T: FTMS (1.1) + p ESI Full lock ms  
[80.00-1600.00]

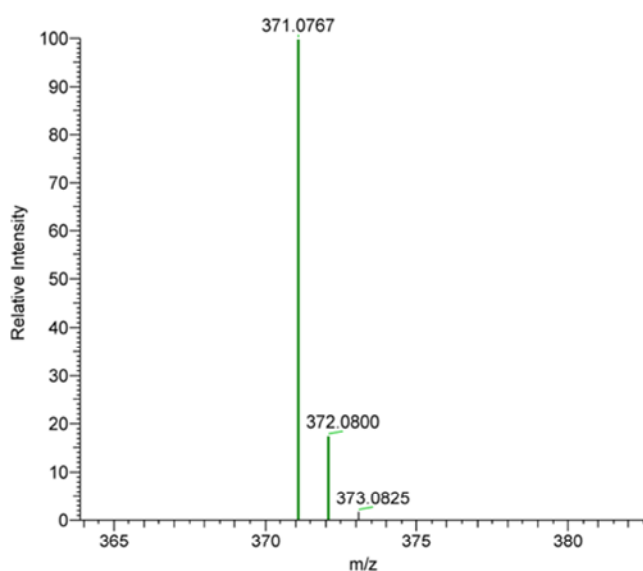

NL: 8.28E5  
C16H15O3N2F3P Chrg 1 R: 42000 Res.  
Pwr. @FWHM

Theoretical Spectrum

| Peak Mass Display... | Combin...                           | RDB       | Delta [p... | Theo. m... | Rank      | Combin... | # Match... | # Misse... | MS Cov... | Pattern... | MSMS...           |
|----------------------|-------------------------------------|-----------|-------------|------------|-----------|-----------|------------|------------|-----------|------------|-------------------|
| 371.0768             | C <sub>16</sub> H <sub>15</sub> ... | 40.278... | 9.50        | 0.33       | 371.07... | 1         | 96.856...  | 3          | 1         | 100        | 99.855... (Collec |

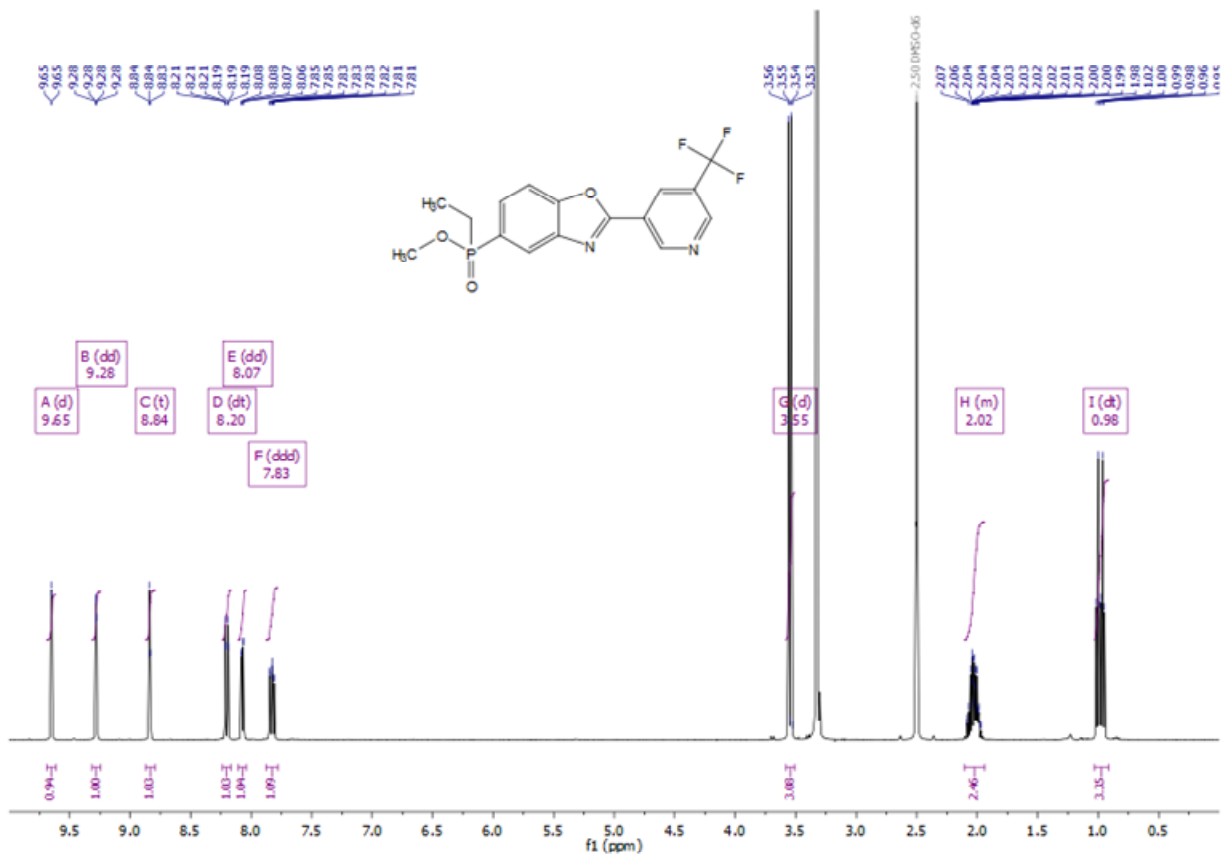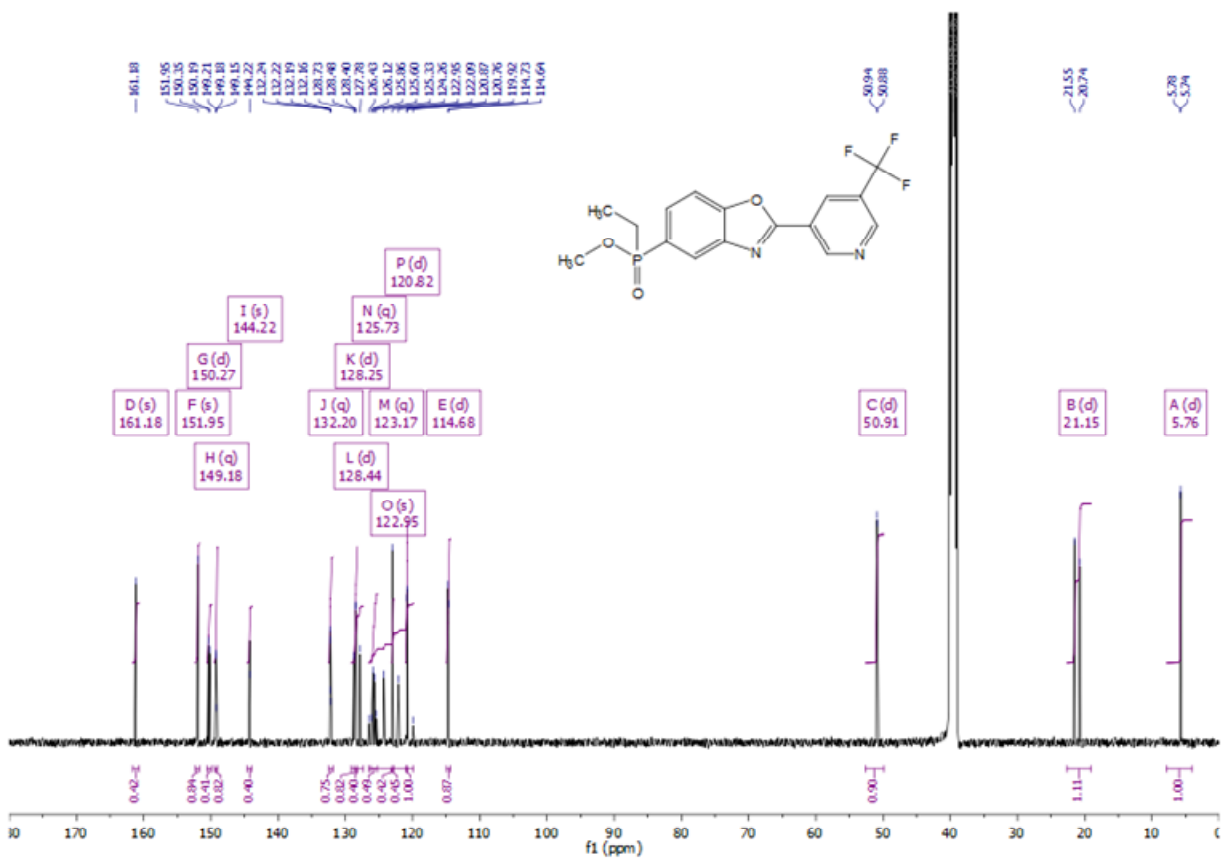

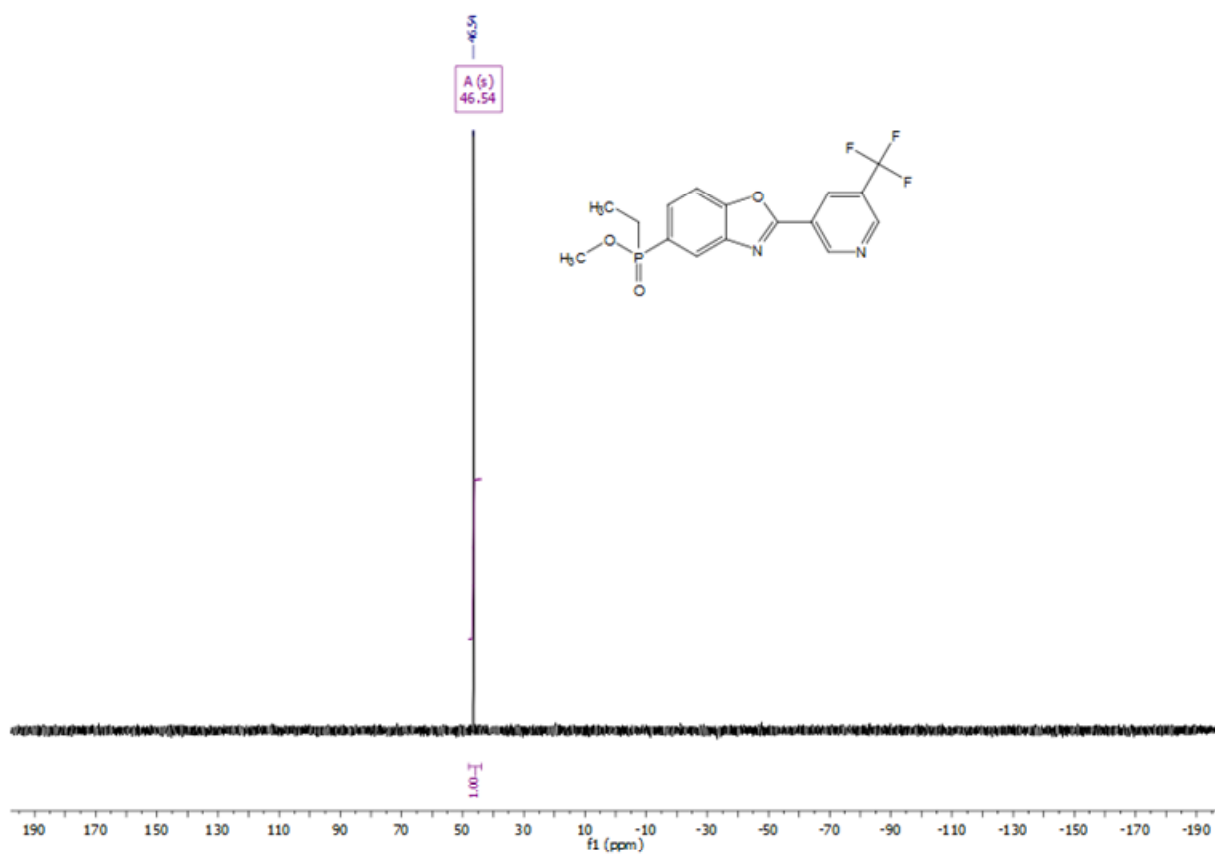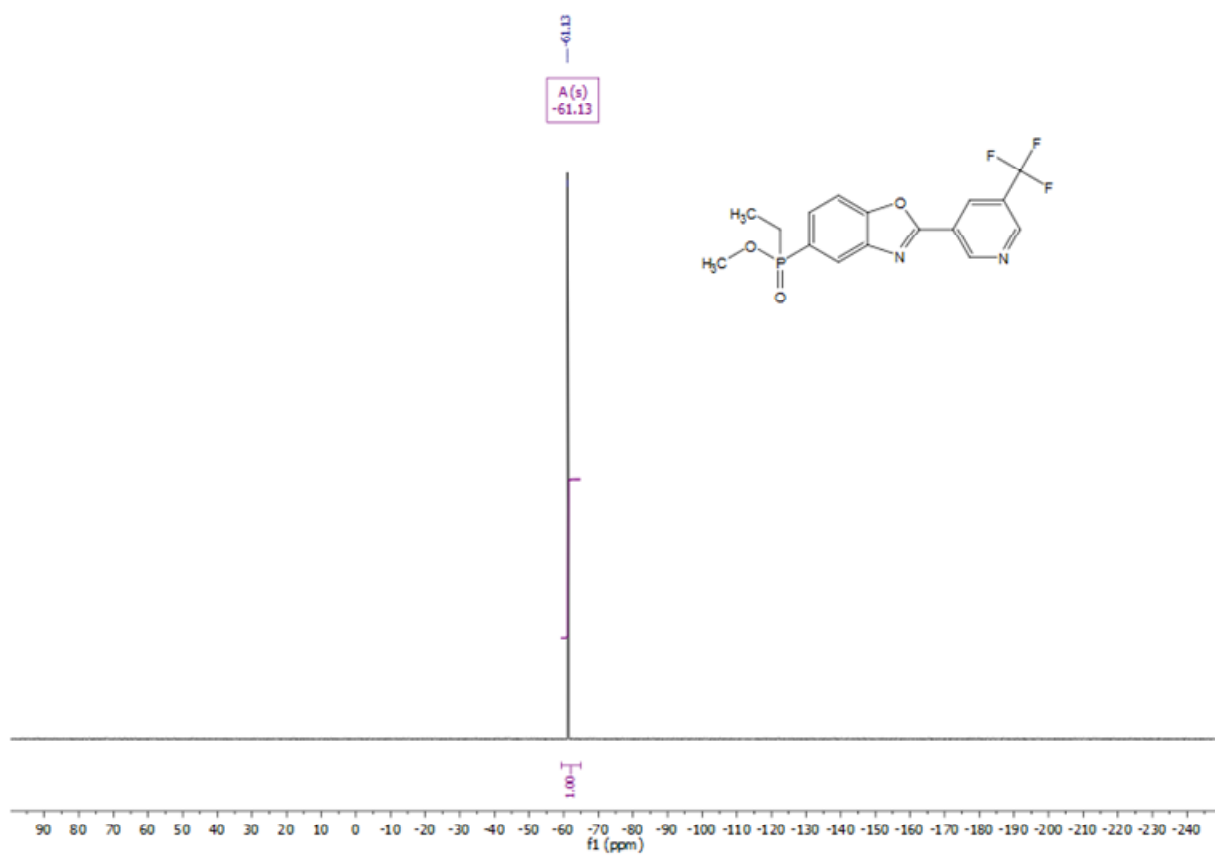



methyl (2-(5-(difluoromethyl)pyridin-3-yl)benzo[d]oxazol-5-yl)(ethyl)phosphinate (22)

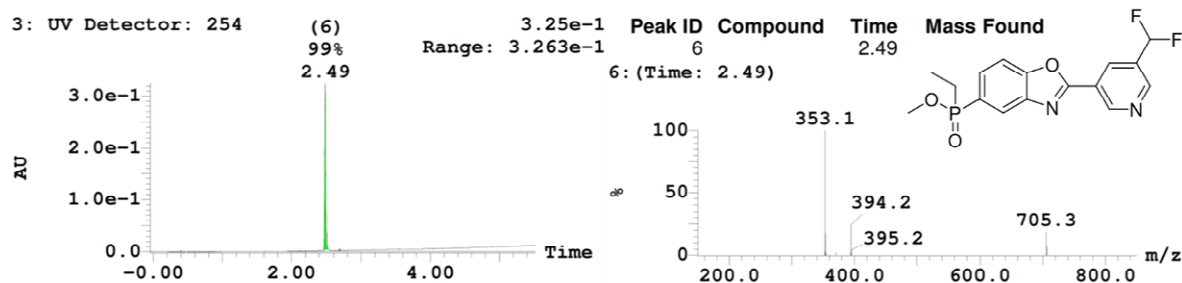

Z:\May 19\ESI77004.raw

15/05/2019 12:51 pm

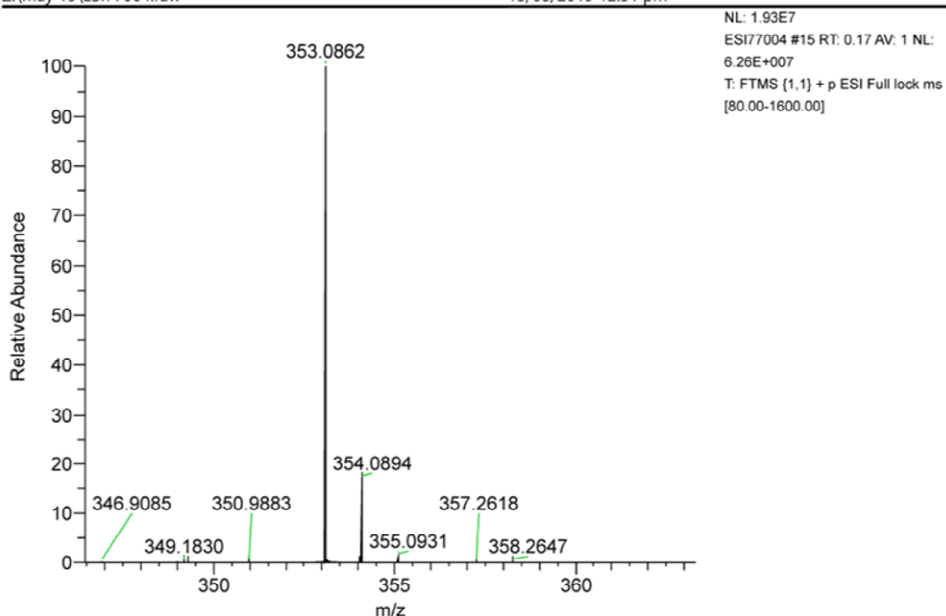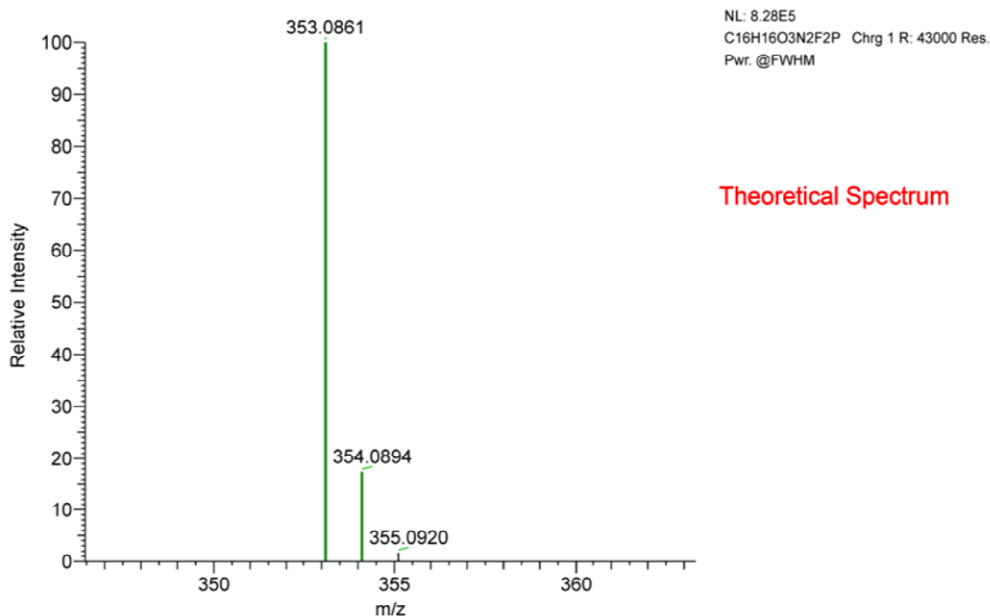

| Peak Mass Display... | Combin...                           | RDB       | Delta [p... | Theo. m... | Rank      | Combin... | # Match... | # Misse... | MS Cov... | Pattern... | MSMS...              |
|----------------------|-------------------------------------|-----------|-------------|------------|-----------|-----------|------------|------------|-----------|------------|----------------------|
| 353.0862             | C <sub>16</sub> H <sub>16</sub> ... | 28.902... | 9.50        | 0.20       | 353.08... | 1         | 95.194...  | 3          | 1         | 98.877...  | 98.194... (Collec... |

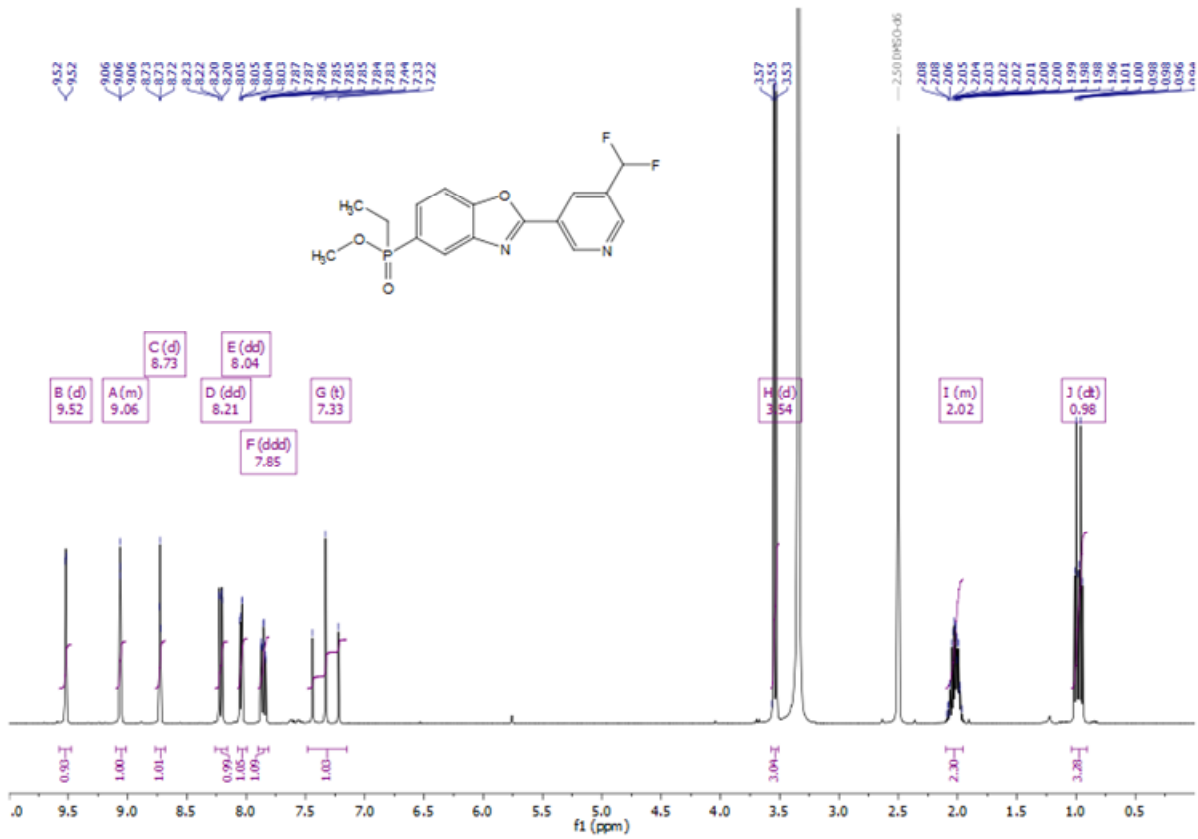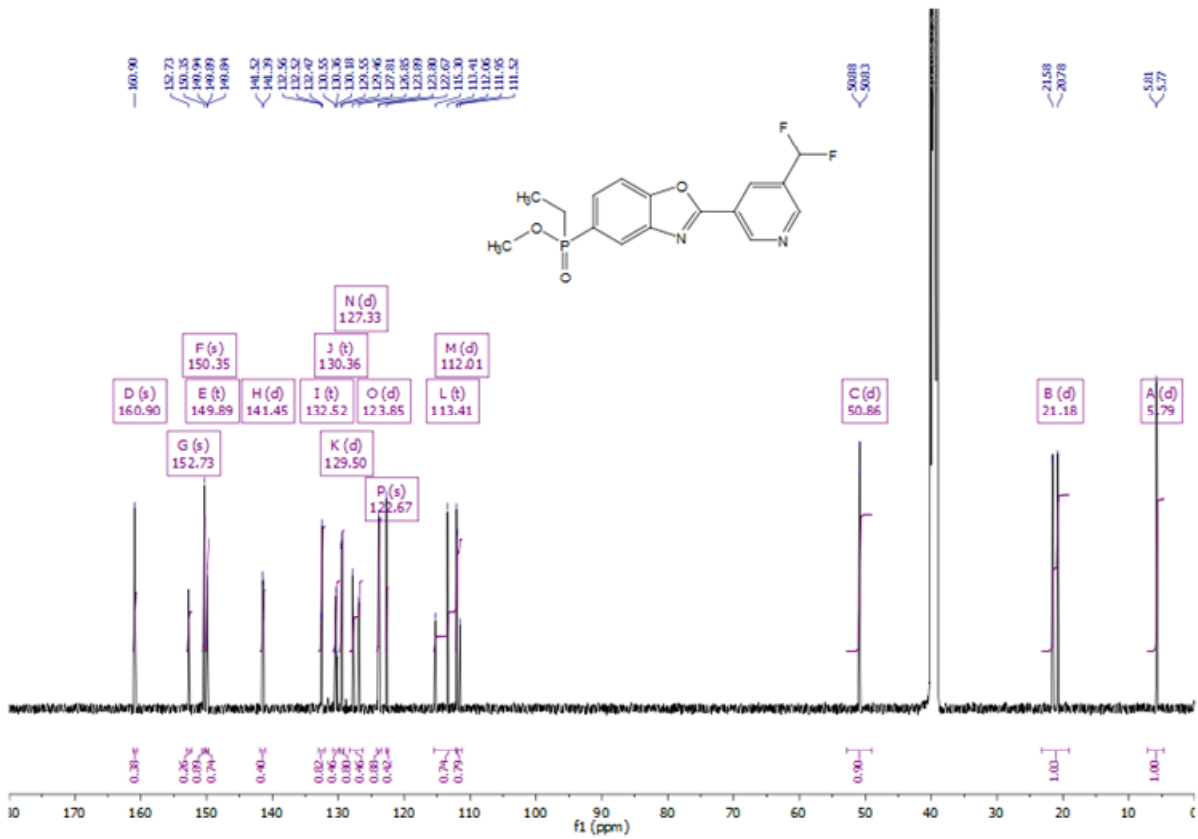

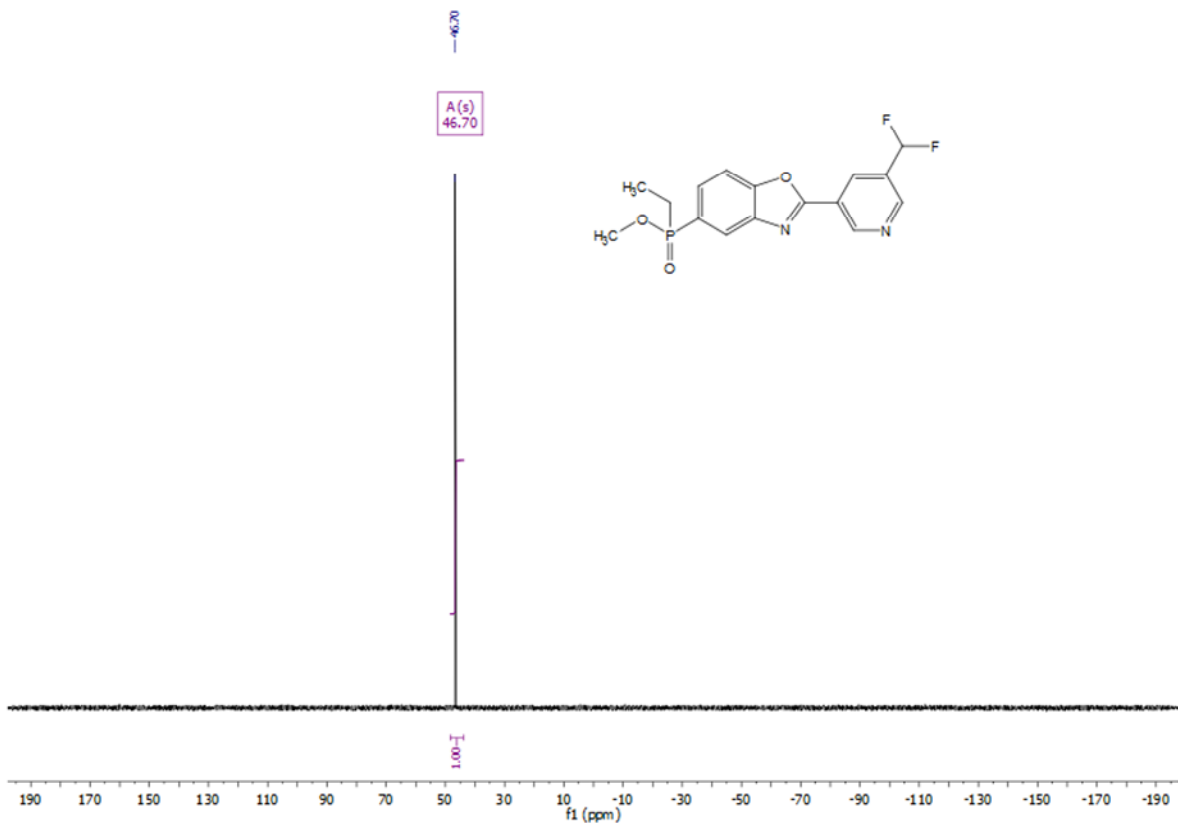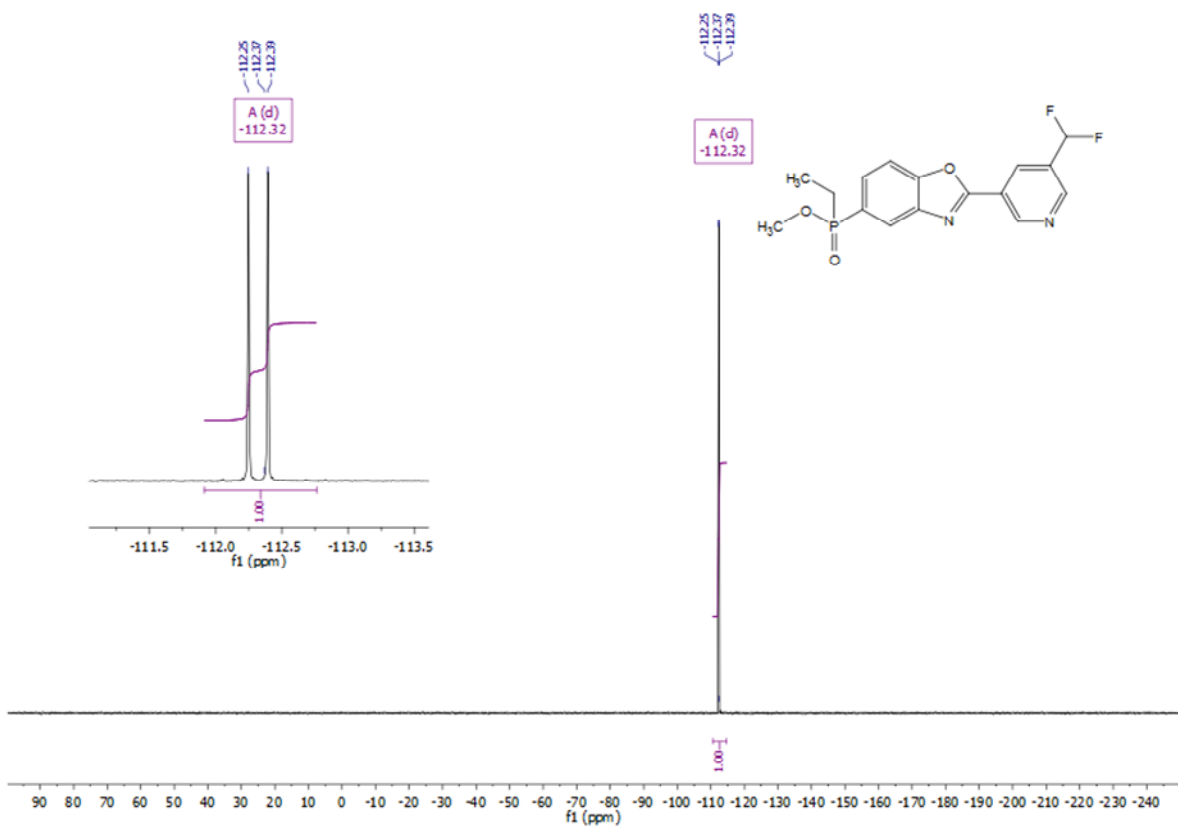

methyl (2-(2-(difluoromethyl)-4-fluorophenyl)benzo[d]oxazol-6-yl)(ethyl)phosphinate (23)

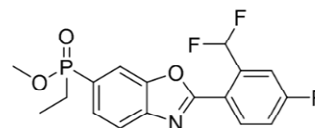

3: UV Detector: 254

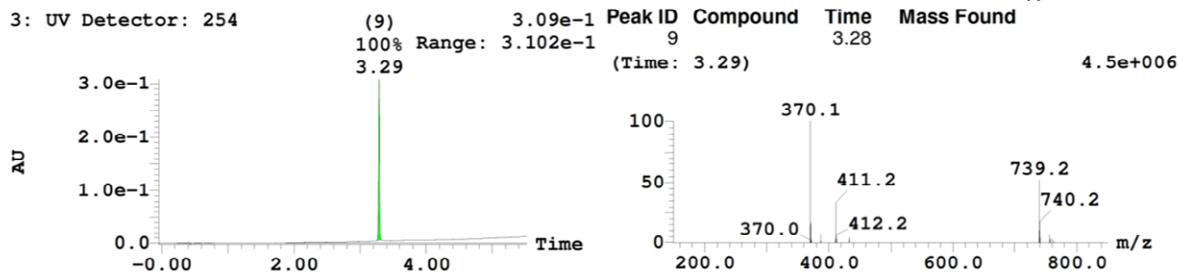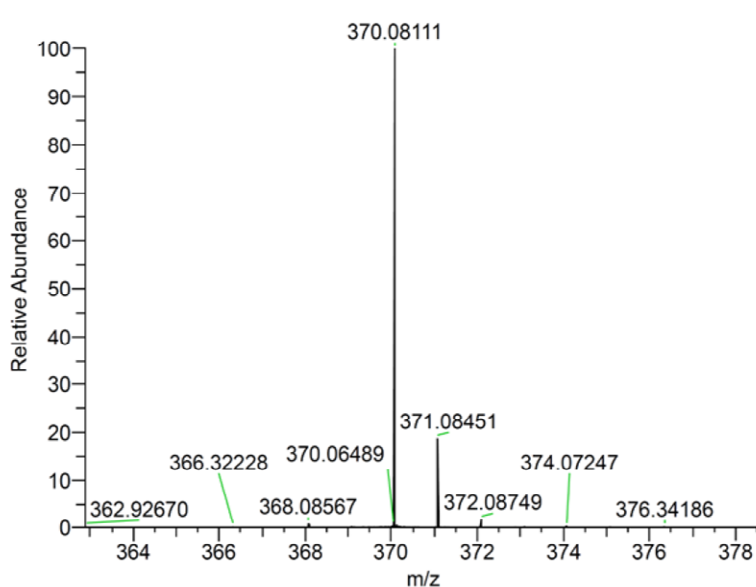

Measured Spectrum

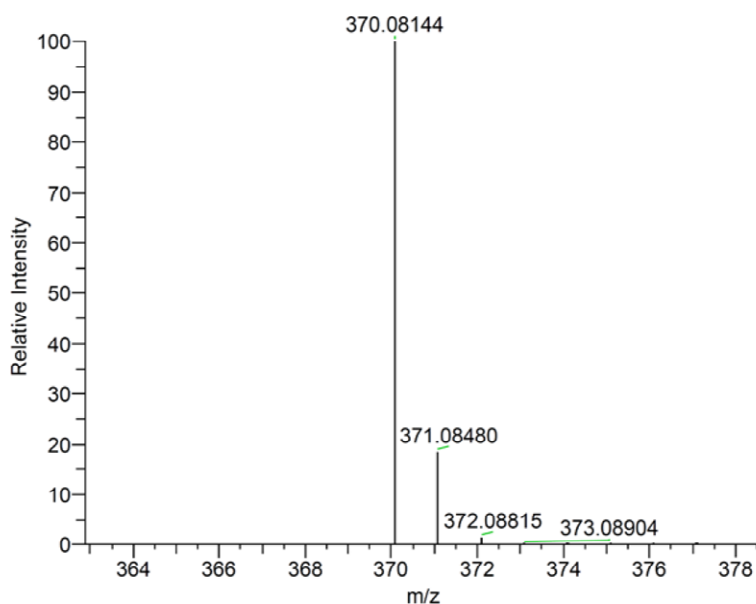

Theoretical Spectrum

| m/z       | Formula                                                          | RDB | Delta ppm | Theo. Mass |
|-----------|------------------------------------------------------------------|-----|-----------|------------|
| 370.08112 | C <sub>17</sub> H <sub>16</sub> O <sub>3</sub> NF <sub>3</sub> P | 9.5 | -0.88     | 370.08144  |

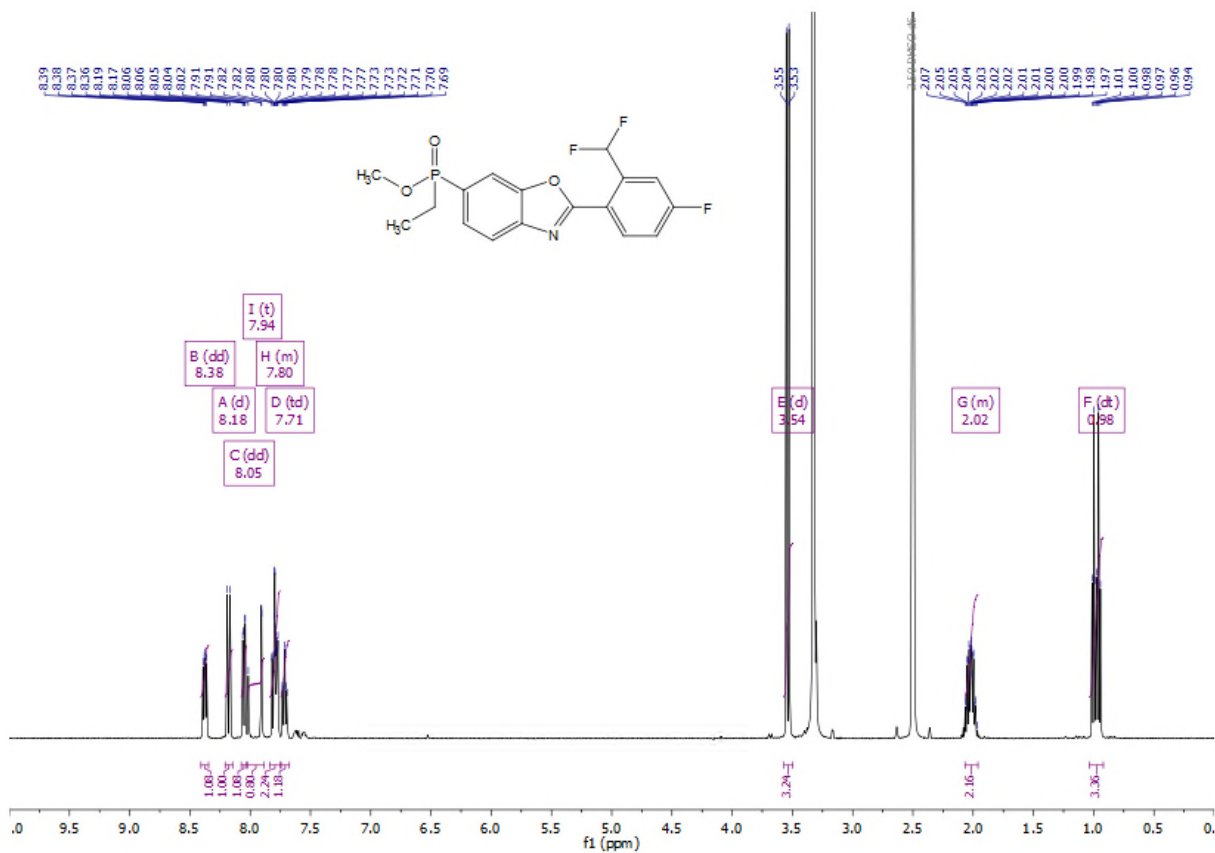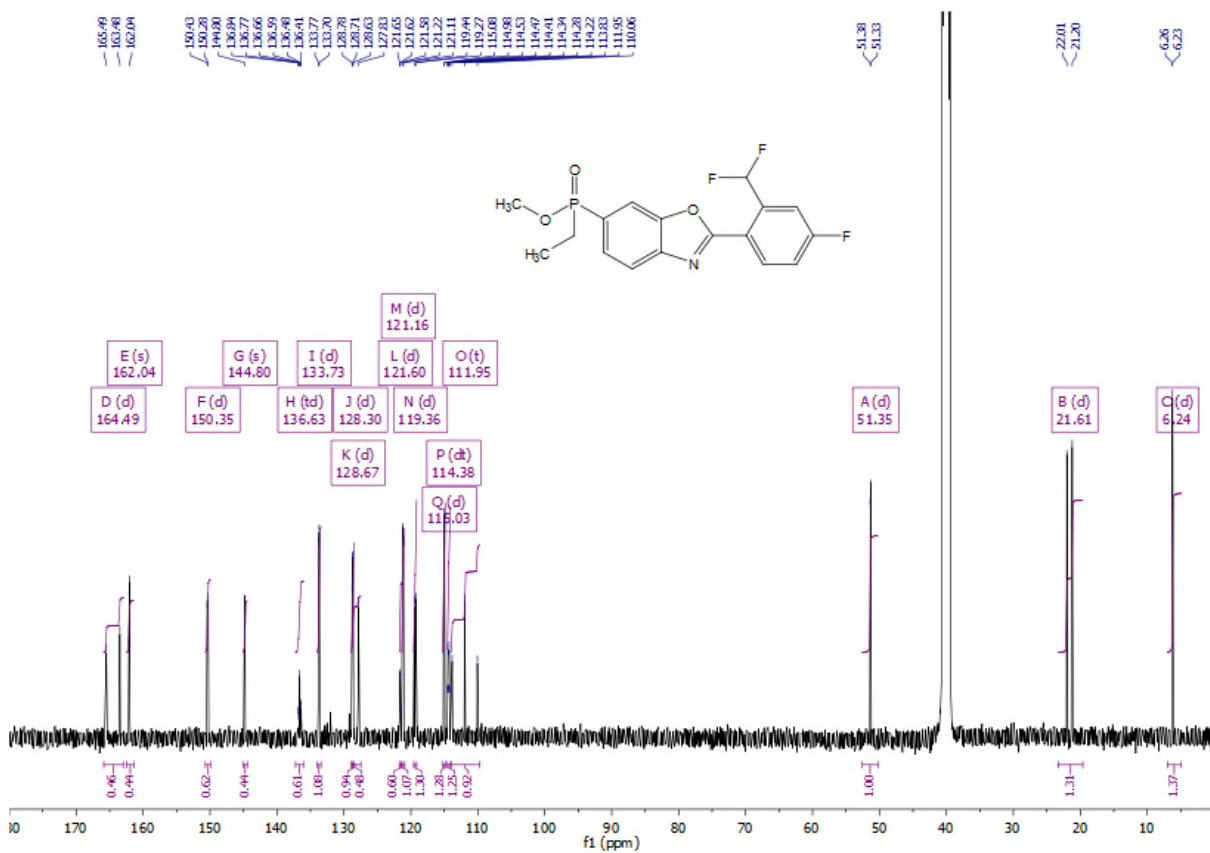

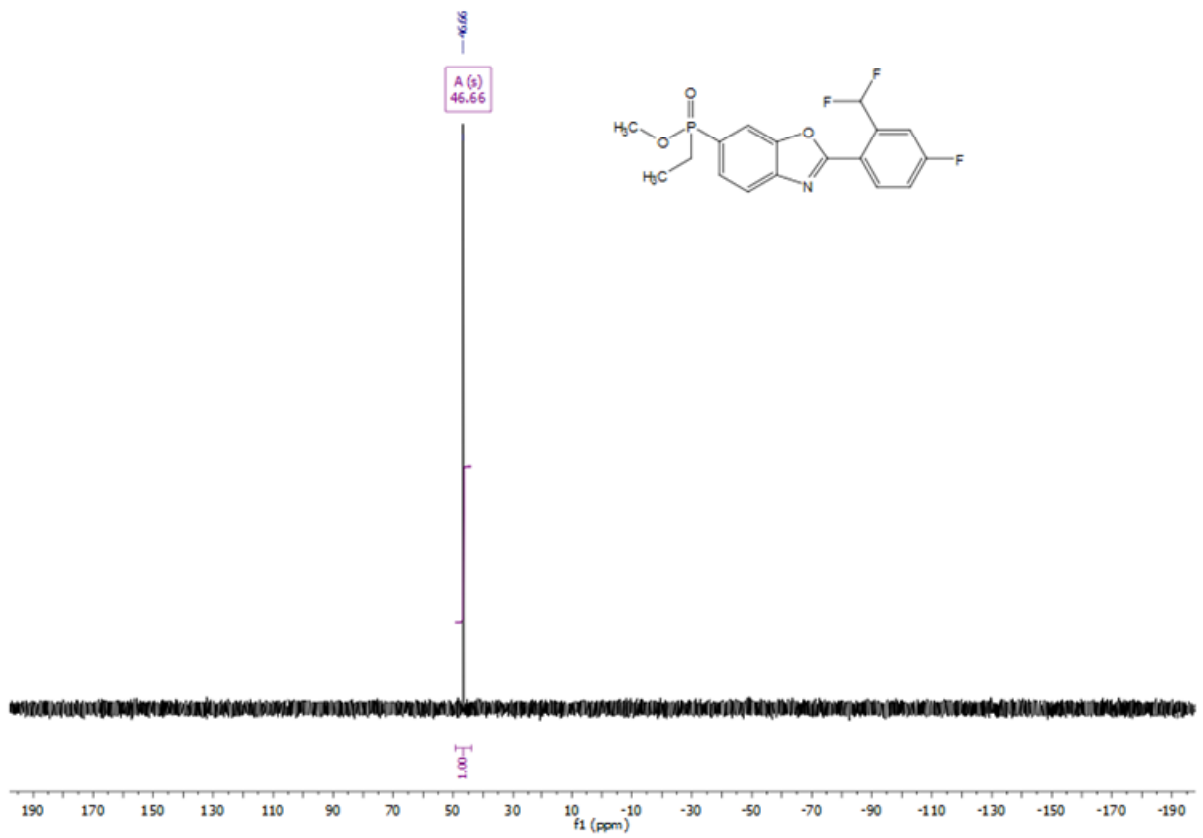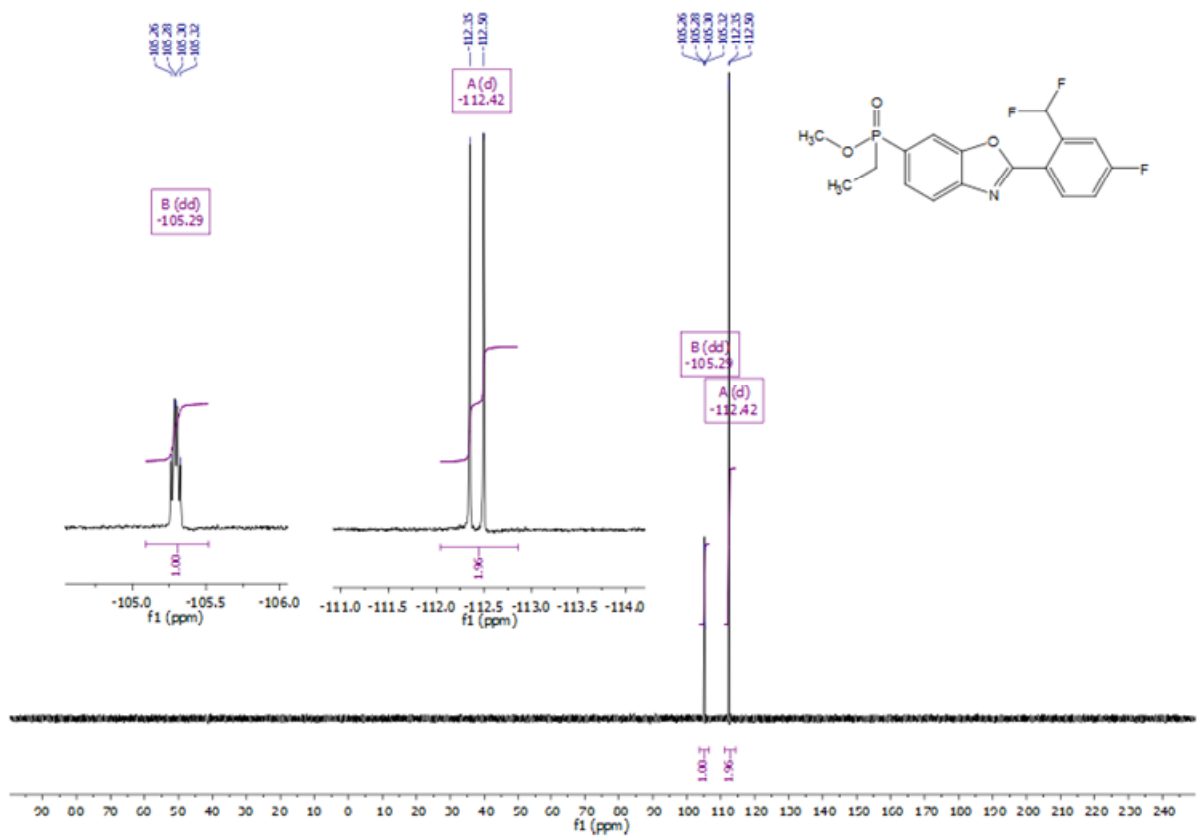

methyl (2-(2,2-difluorobenzo[d][1,3]dioxol-5-yl)benzo[d]oxazol-6-yl)(ethyl)phosphinate (24)

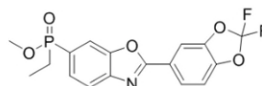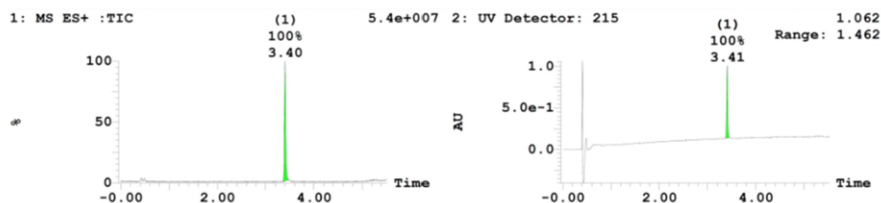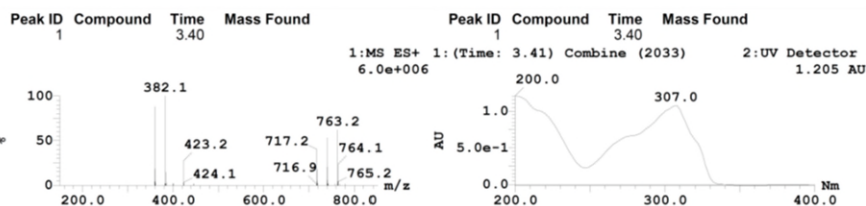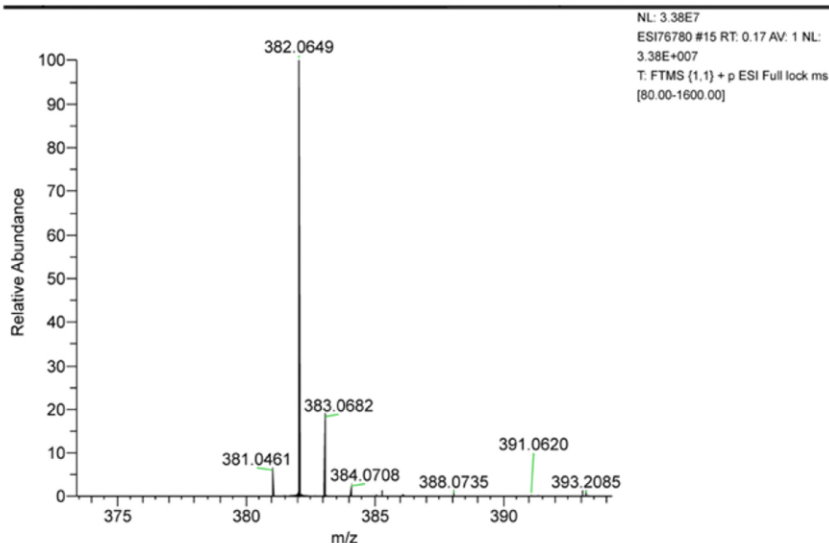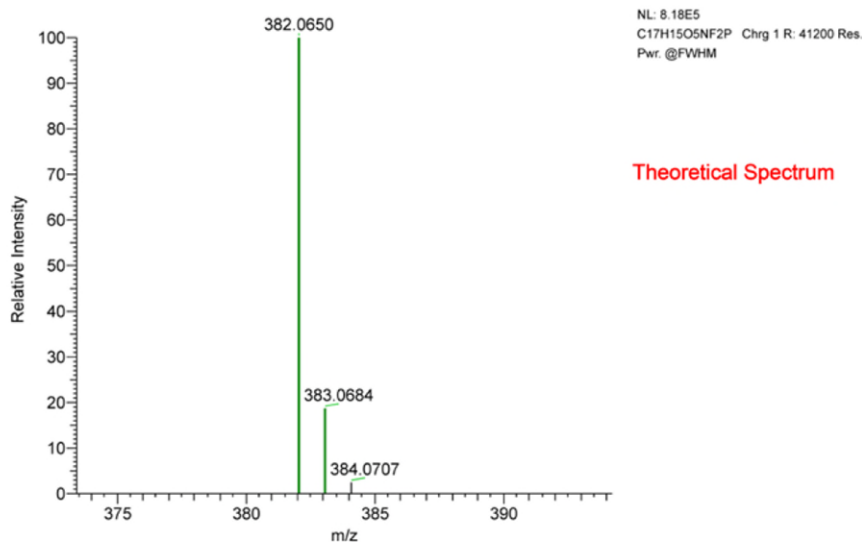

| Peak Mass | Display...                          | Combin... | RDB   | Delta [p... | Theo. m... | Rank | Combin... | # Match... | # Misse... | MS Cov... | Pattern... | MSMS...    |
|-----------|-------------------------------------|-----------|-------|-------------|------------|------|-----------|------------|------------|-----------|------------|------------|
| 382.0649  | C <sub>17</sub> H <sub>15</sub> ... | 28.888... | 10.50 | -0.42       | 382.06...  | 1    | 94.771... | 4          | 0          | 98.432... | 97.662...  | (Collec... |

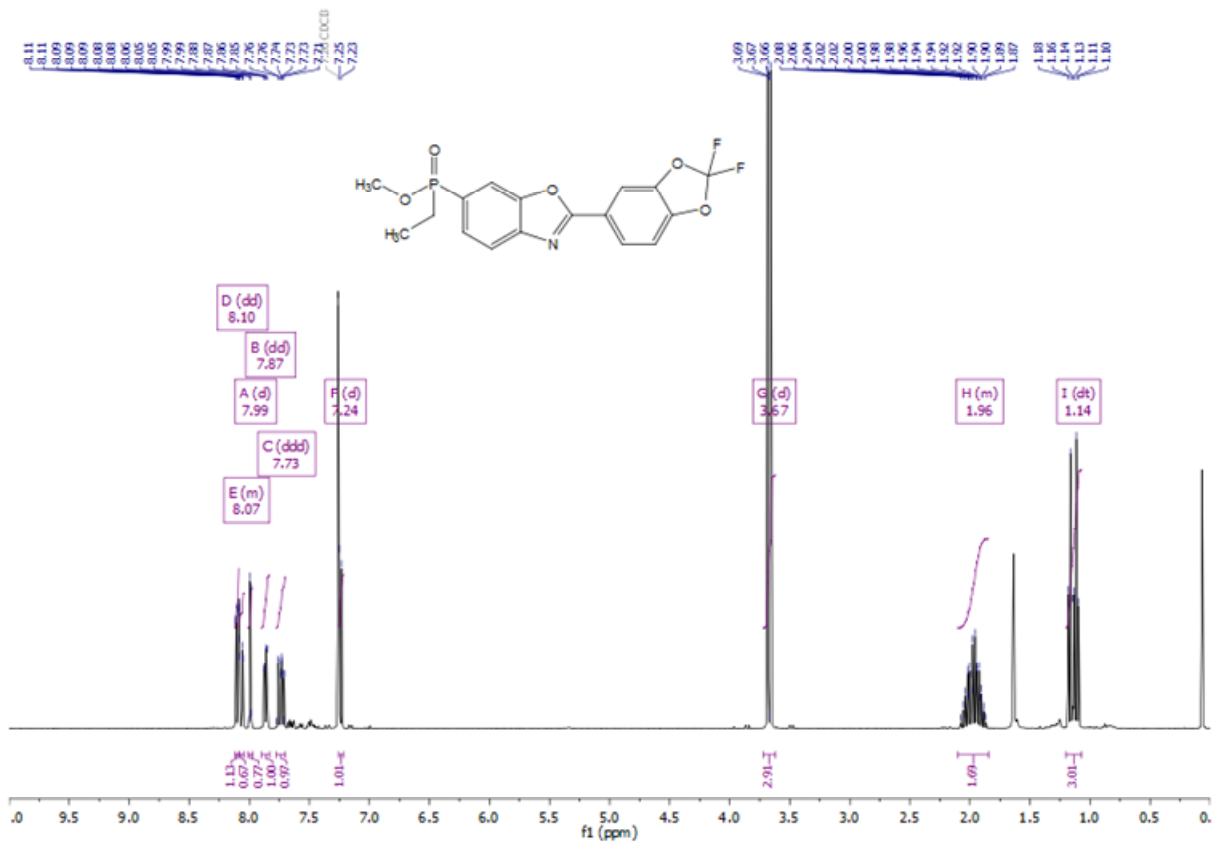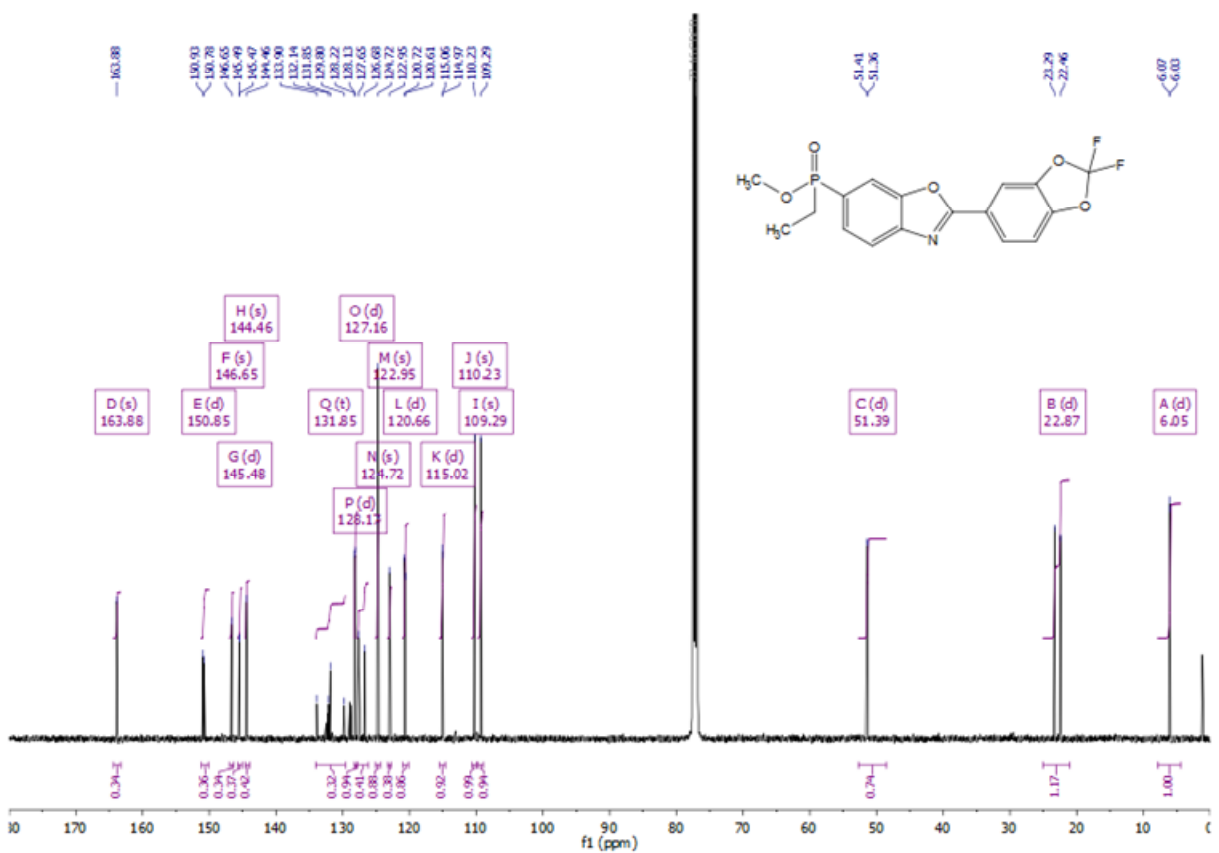



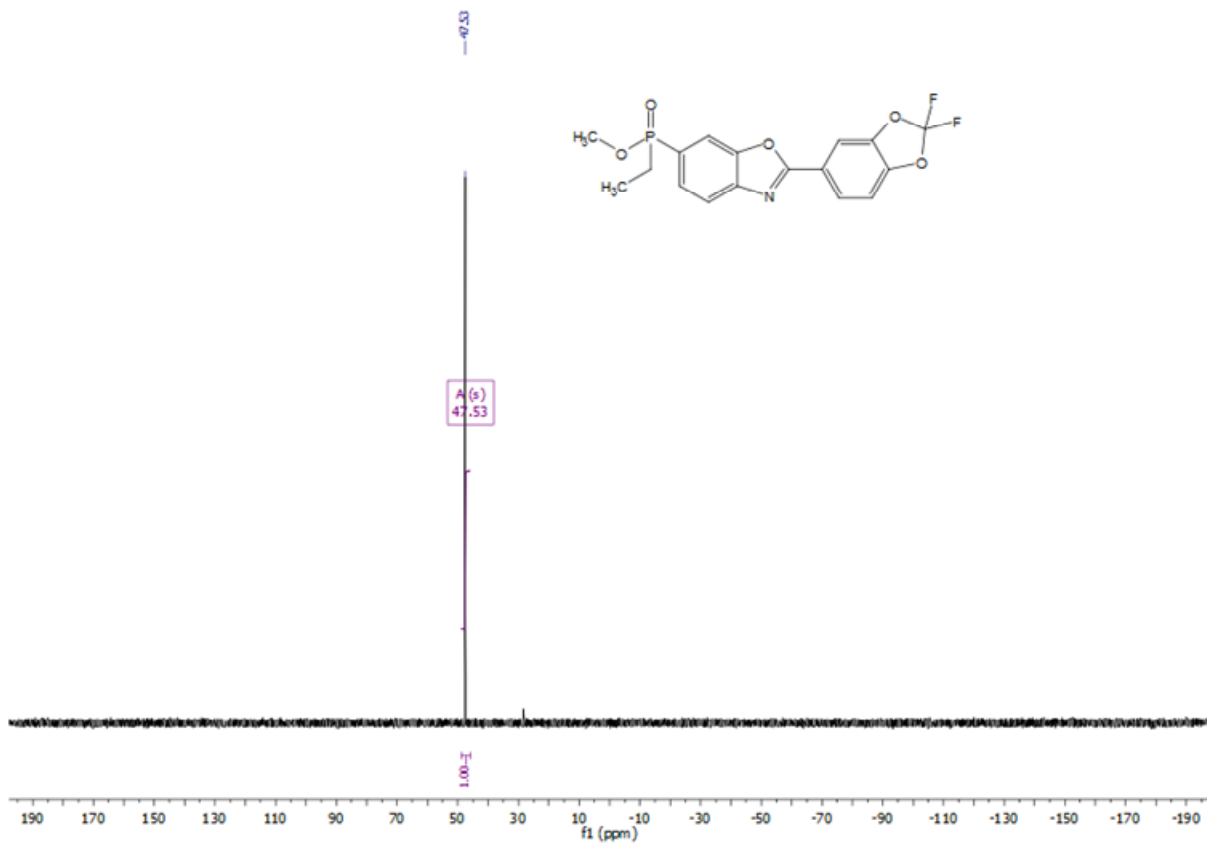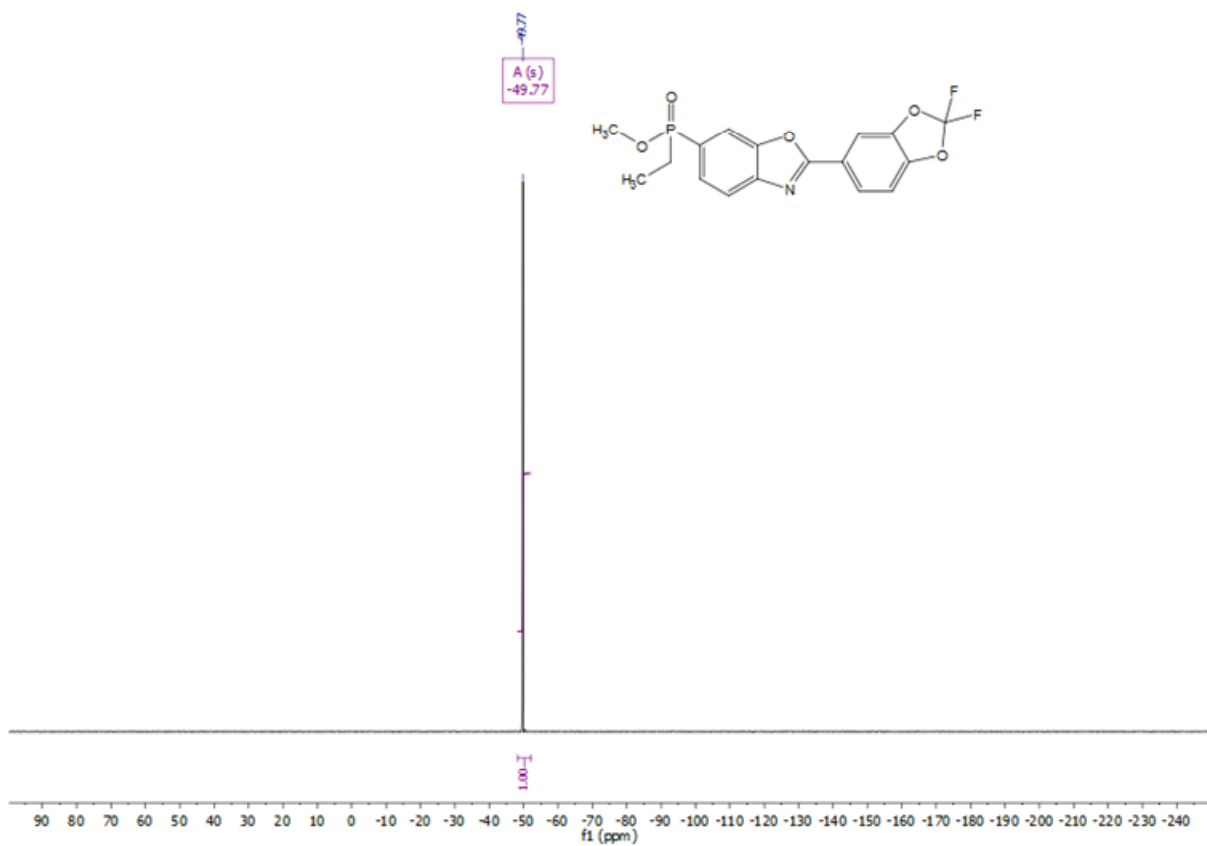

methyl (2-(2-(difluoromethoxy)pyridin-4-yl)benzo[d]oxazol-6-yl)(ethyl)phosphinate (25)

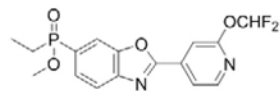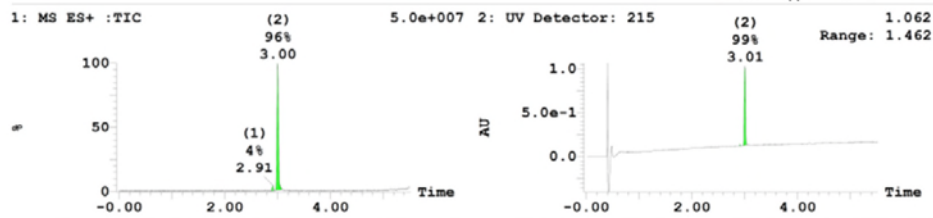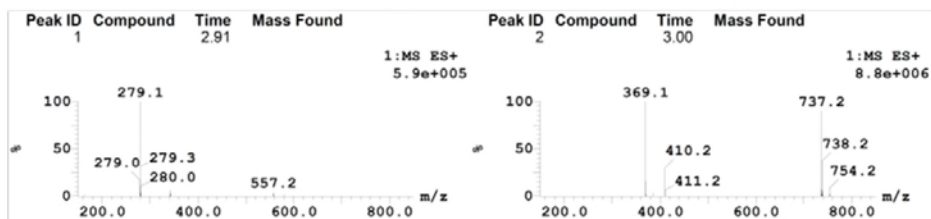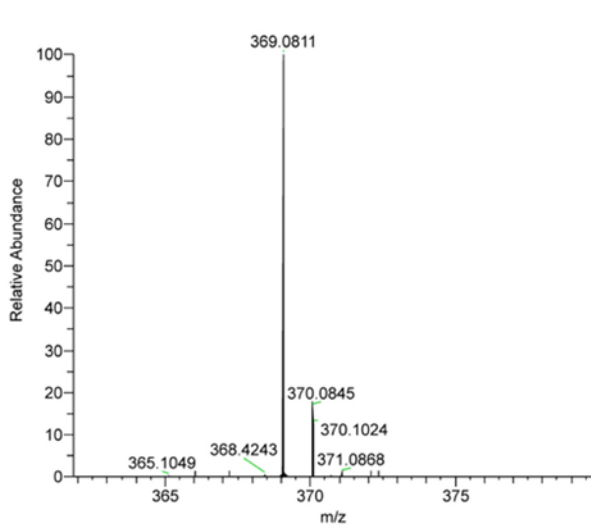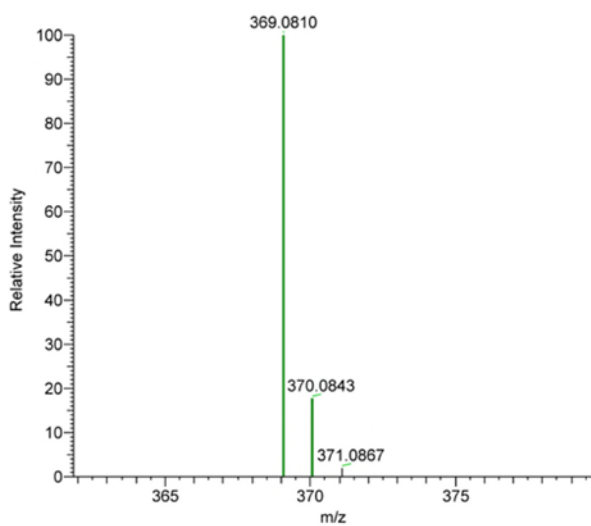

Theoretical Spectrum

| Peak Mass Display... | Combin...                           | RDB       | Delta [p...] | Theo. m... | Rank      | Combin... | # Match... | # Misse... | MS Cov... | Pattern... | MSMS...              |
|----------------------|-------------------------------------|-----------|--------------|------------|-----------|-----------|------------|------------|-----------|------------|----------------------|
| 369.0811             | C <sub>18</sub> H <sub>16</sub> ... | 38.696... | 9.50         | 0.32       | 369.08... | 1         | 95.632...  | 4          | 0         | 98.795...  | 98.168... (Collec... |

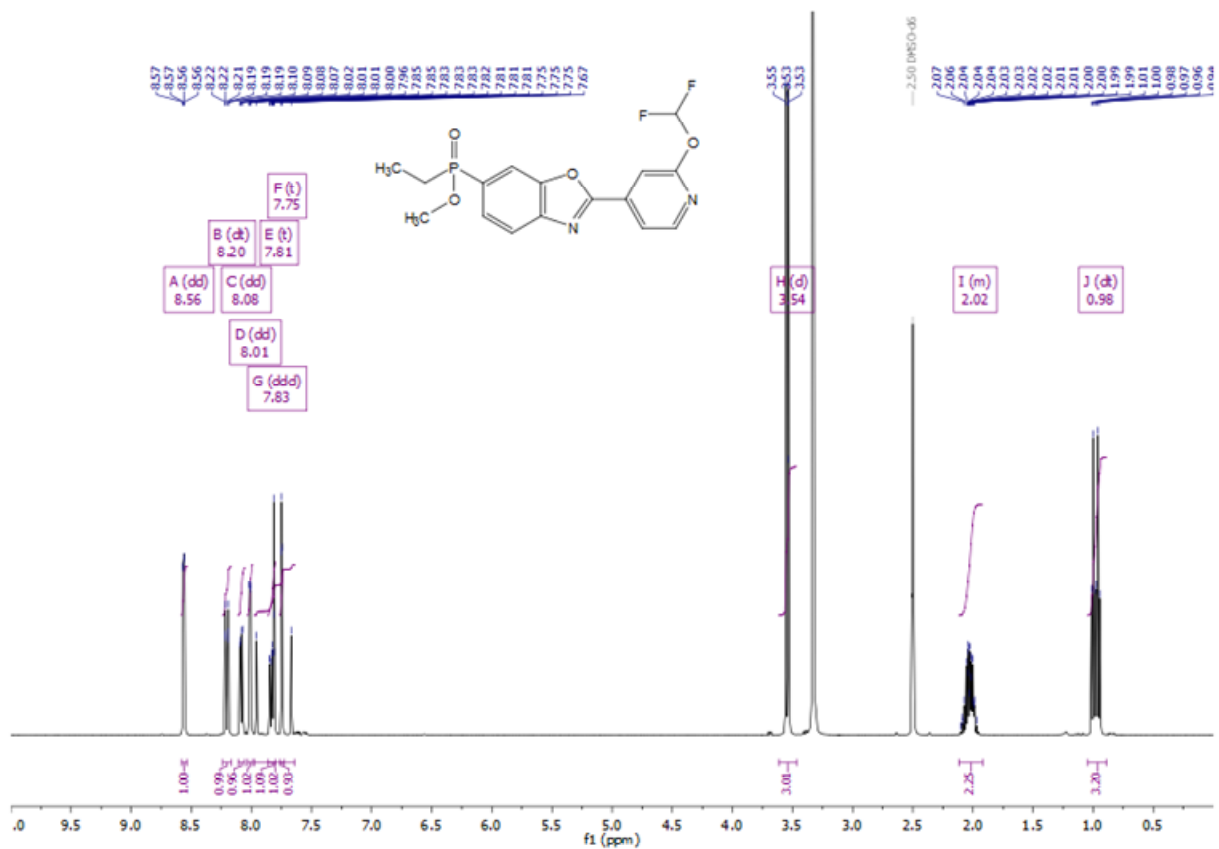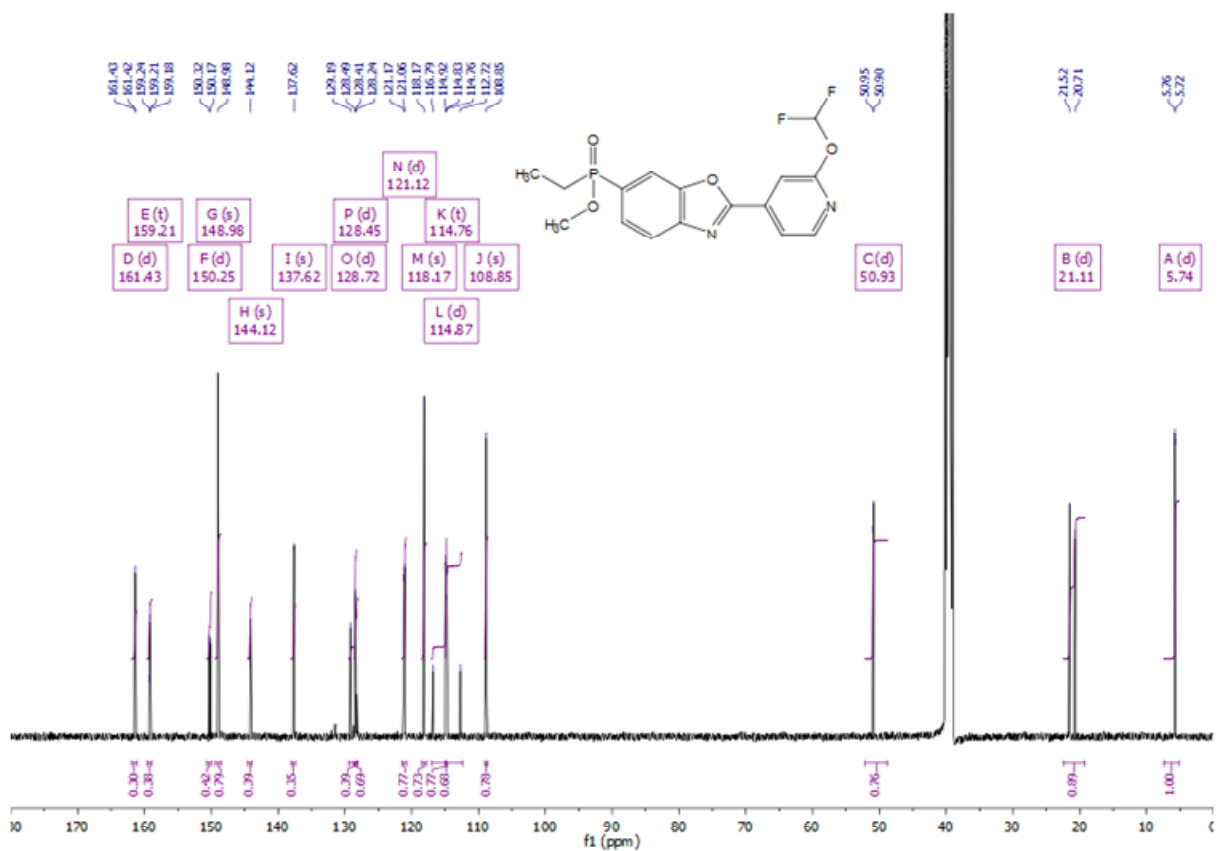

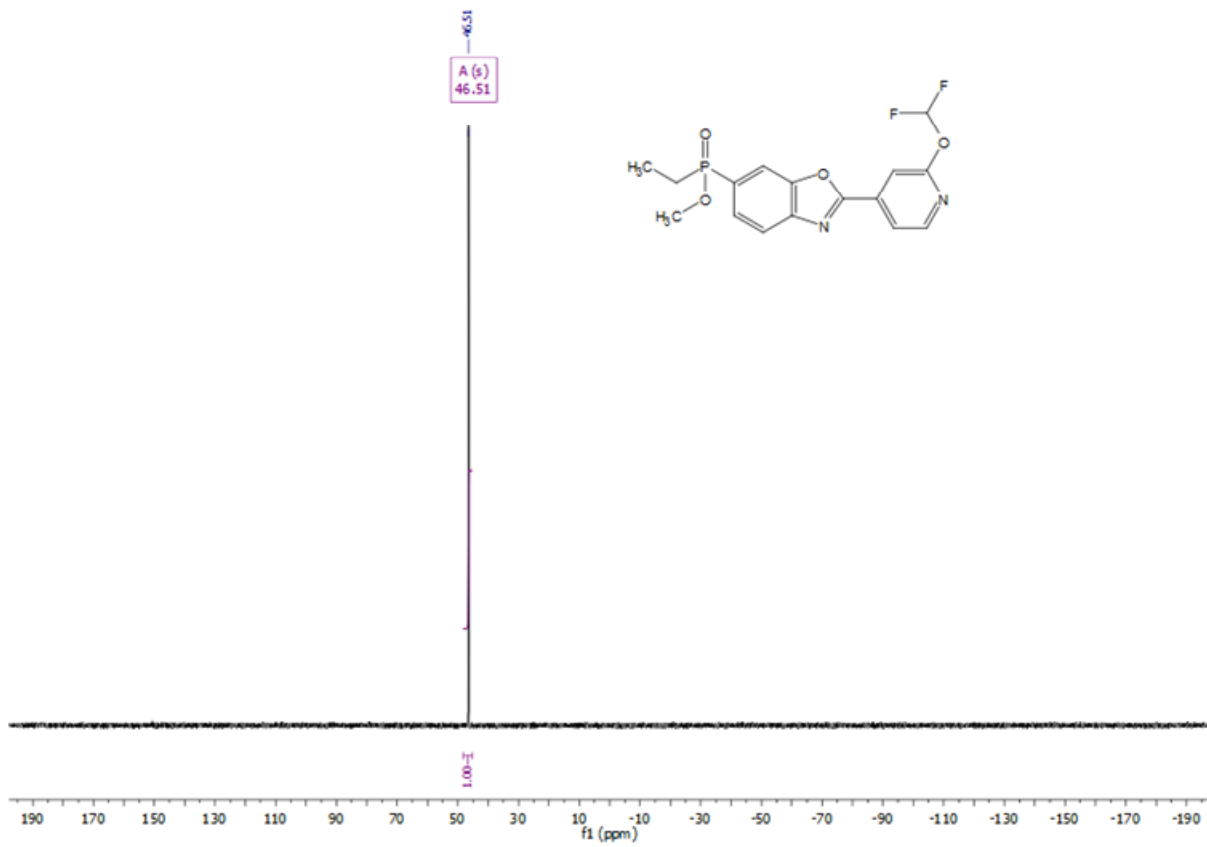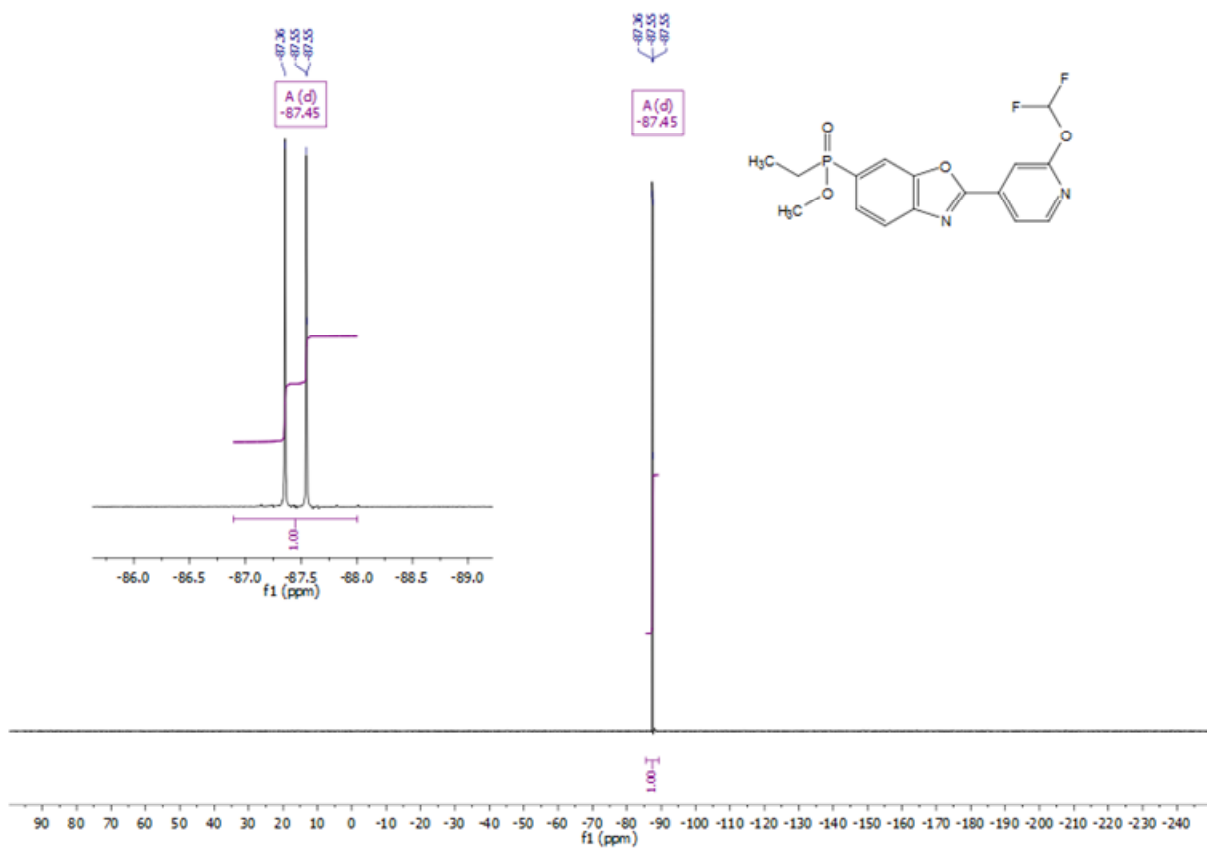

# methyl ethyl(2-(5-(trifluoromethyl)pyridin-3-yl)benzo[d]oxazol-6-yl)phosphinate (26)

## PDA Chromatogram

1: Wavelength 215 nm, Band Width 4 nm

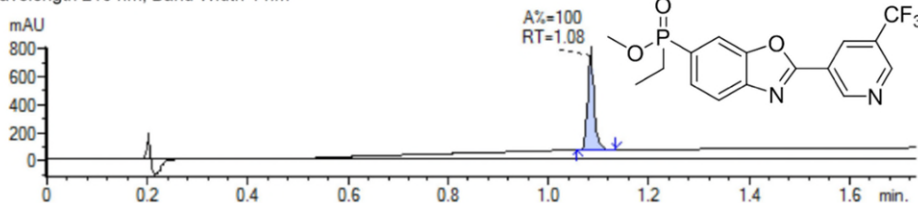

## MS Spectrum

Group#1 - PDA Peak: 5, RT: 1.06 to 1.13 min

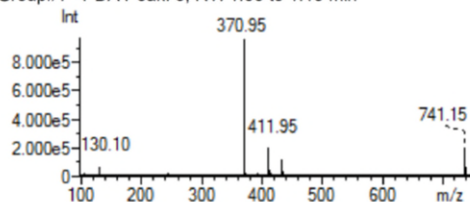

## MS Spectrum

Group#2 - PDA Peak: 5, RT: 1.06 to 1.13 min

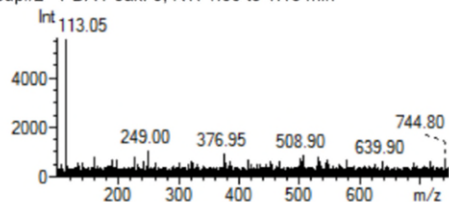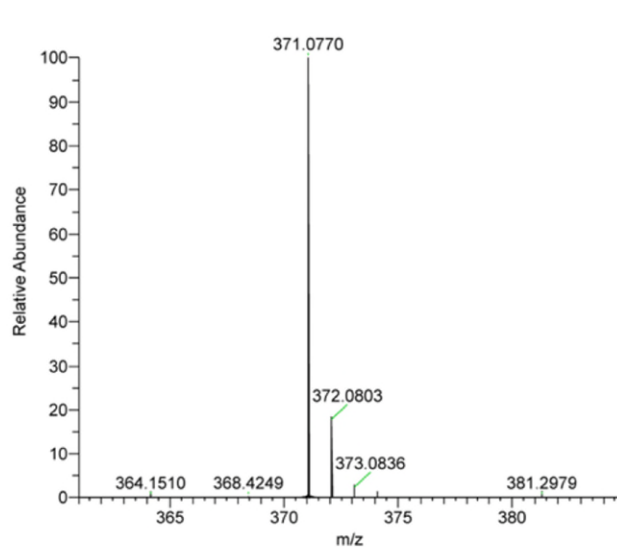

NL: 2.07E7  
ESI77000 #15 RT: 0.17 AV: 1 NL:  
6.36E+007  
T: FTMS (1,1) + p ESI Full lock ms  
[80.00-1600.00]

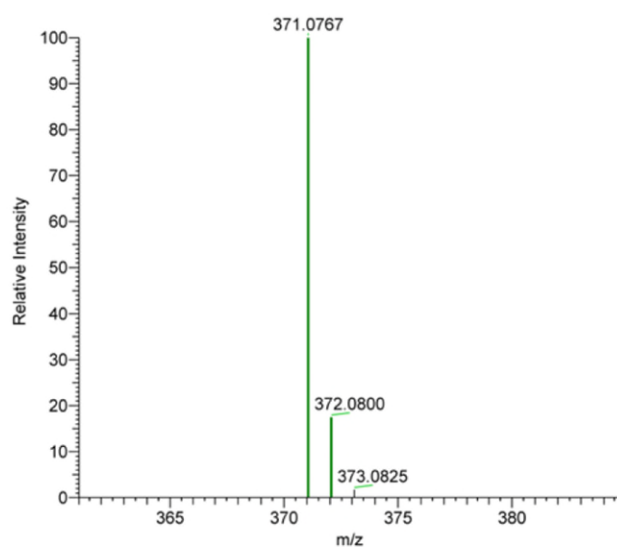

NL: 8.28E5  
C16H15O3N2F3P Chrg 1 R: 41900 Res.  
Pwr. @FWHM

Theoretical Spectrum

| Peak Mass Display... | Combin...                           | RDB       | Delta [p... | Theo. m... | Rank      | Combin... | # Match... | # Misse... | MS Cov... | Pattern... | MSMS              |
|----------------------|-------------------------------------|-----------|-------------|------------|-----------|-----------|------------|------------|-----------|------------|-------------------|
| 371.0770             | C <sub>16</sub> H <sub>15</sub> ... | 40.435... | 9.50        | 0.82       | 371.07... | 1         | 96.457...  | 3          | 1         | 99.569...  | 99.855... (Collec |



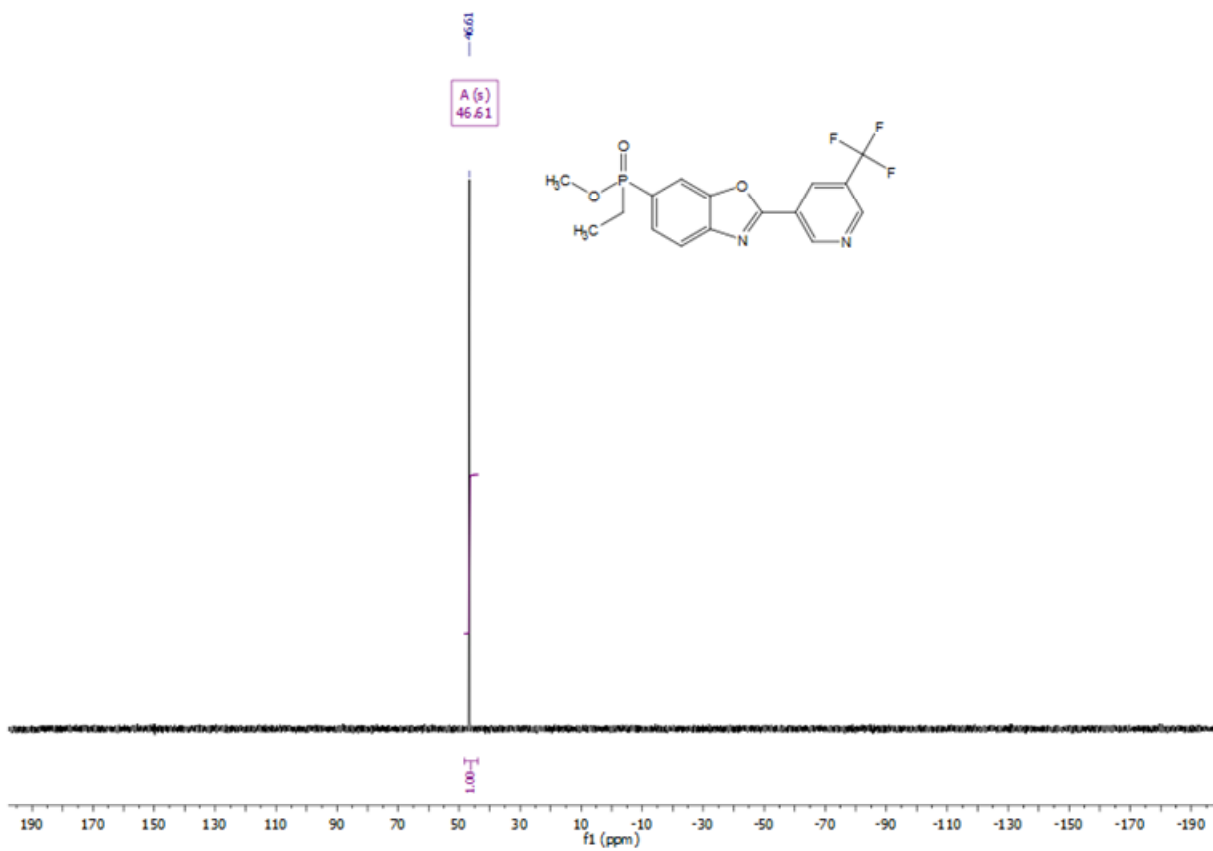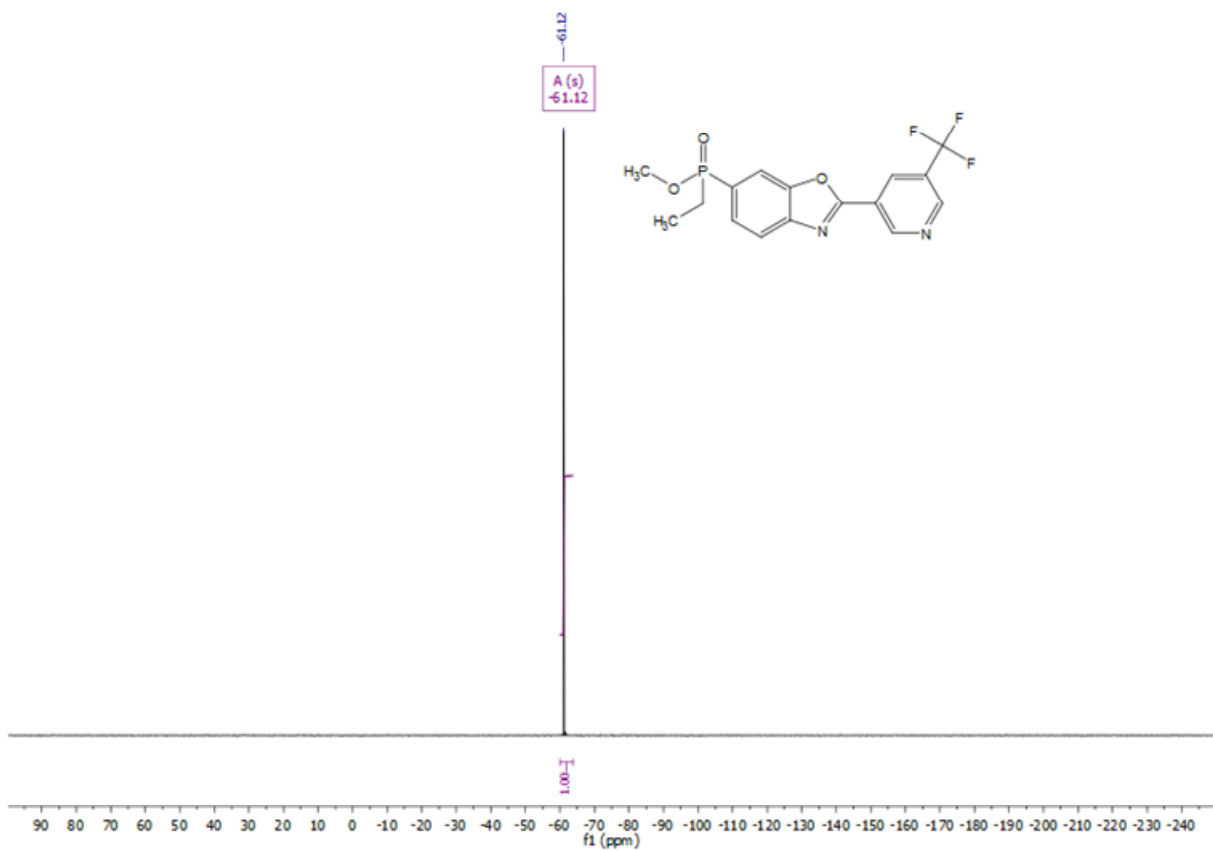

methyl (2-(5-(difluoromethyl)pyridin-3-yl)benzo[d]oxazol-6-yl)(ethyl)phosphinate (27)

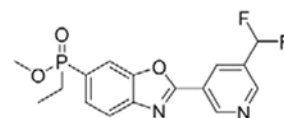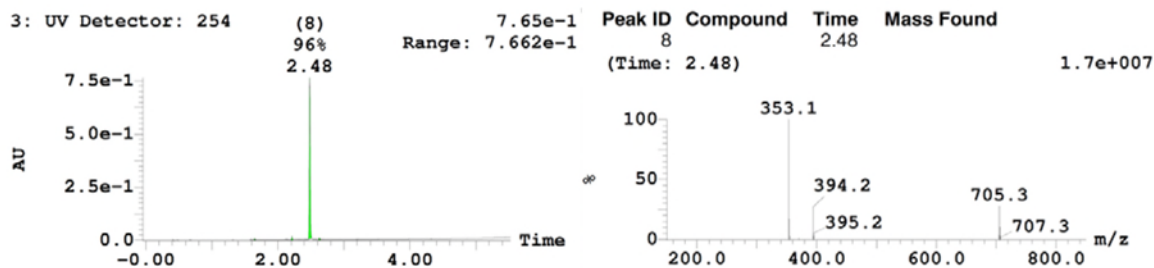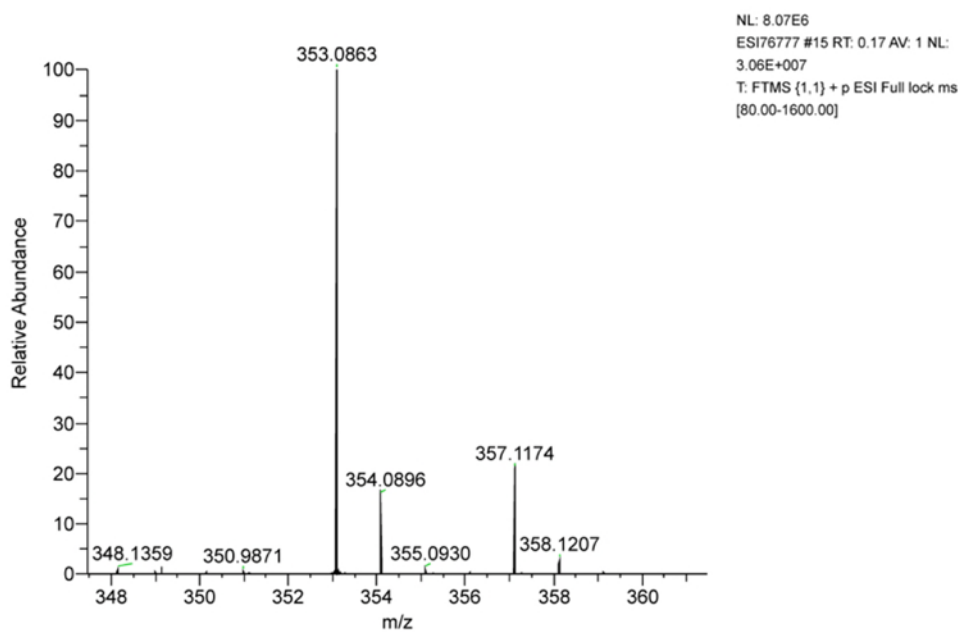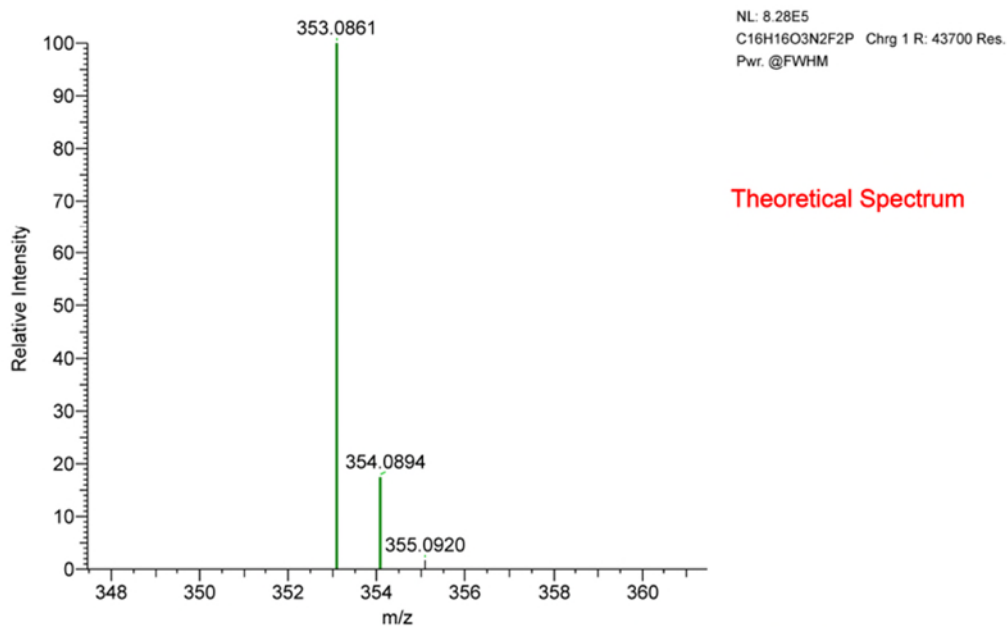

| Peak Mass Display... | Combin... | RDB       | Delta [p... | Theo. m... | Rank      | Combin... | # Match... | # Misse... | MS Cov... | Pattern... | MSMS...               |
|----------------------|-----------|-----------|-------------|------------|-----------|-----------|------------|------------|-----------|------------|-----------------------|
| 353.0863             | C16H16... | 27.433... | 9.50        | 0.46       | 353.08... | 1         | 95.088...  | 3          | 1         | 98.846...  | 98.199...<br>(Collec. |



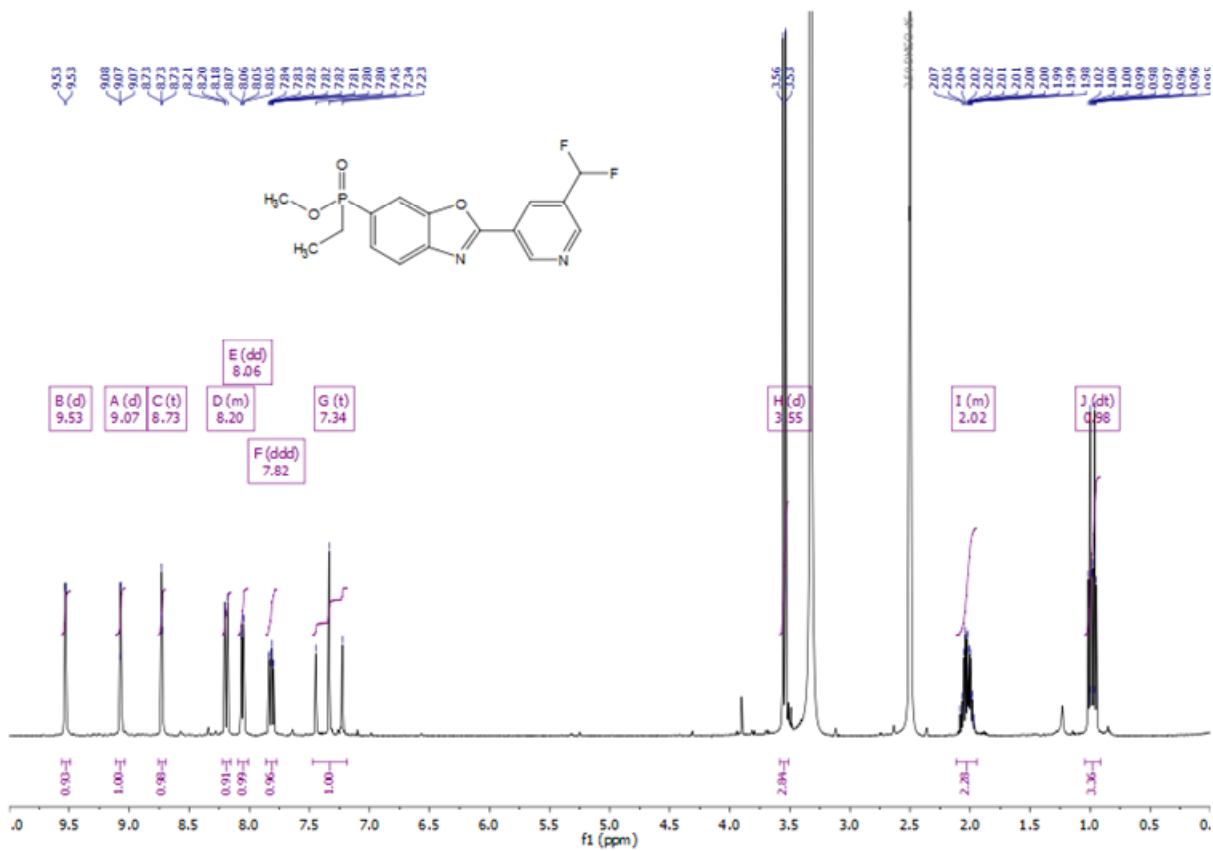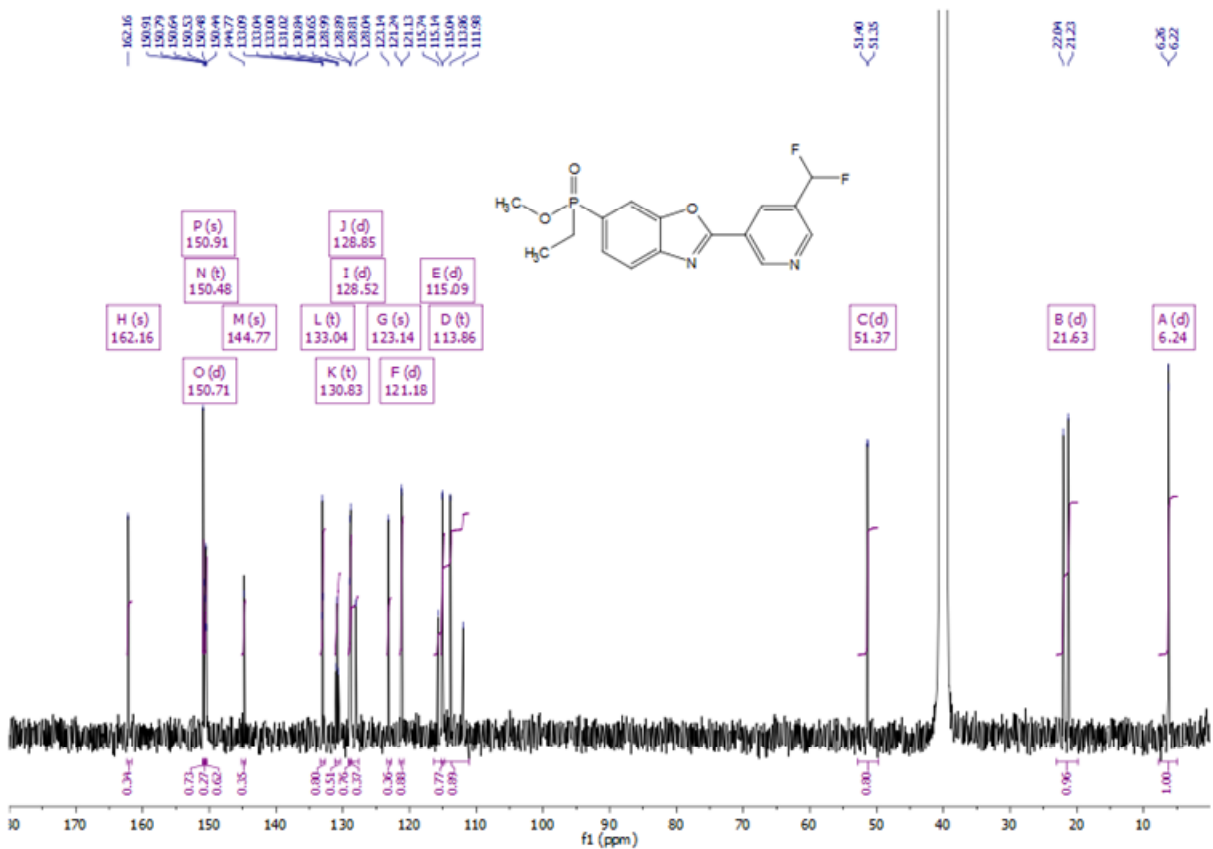

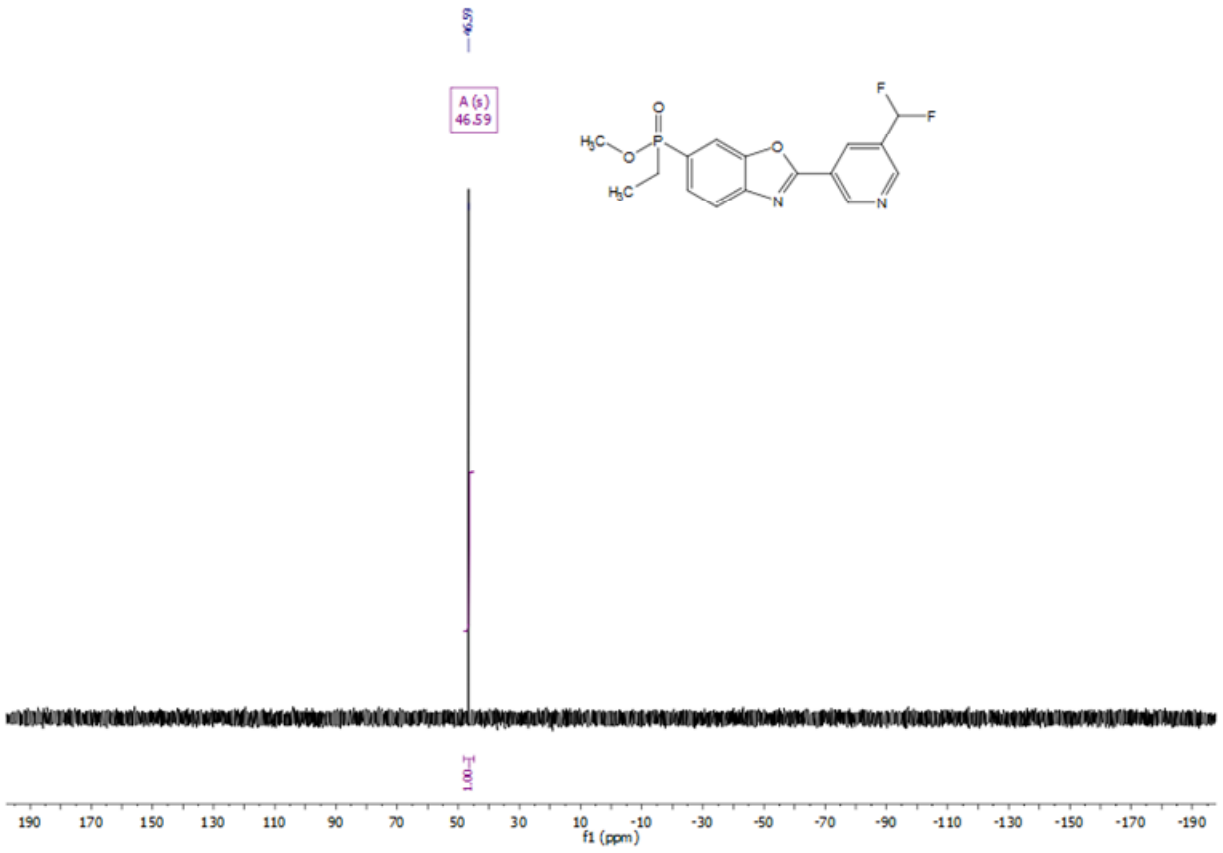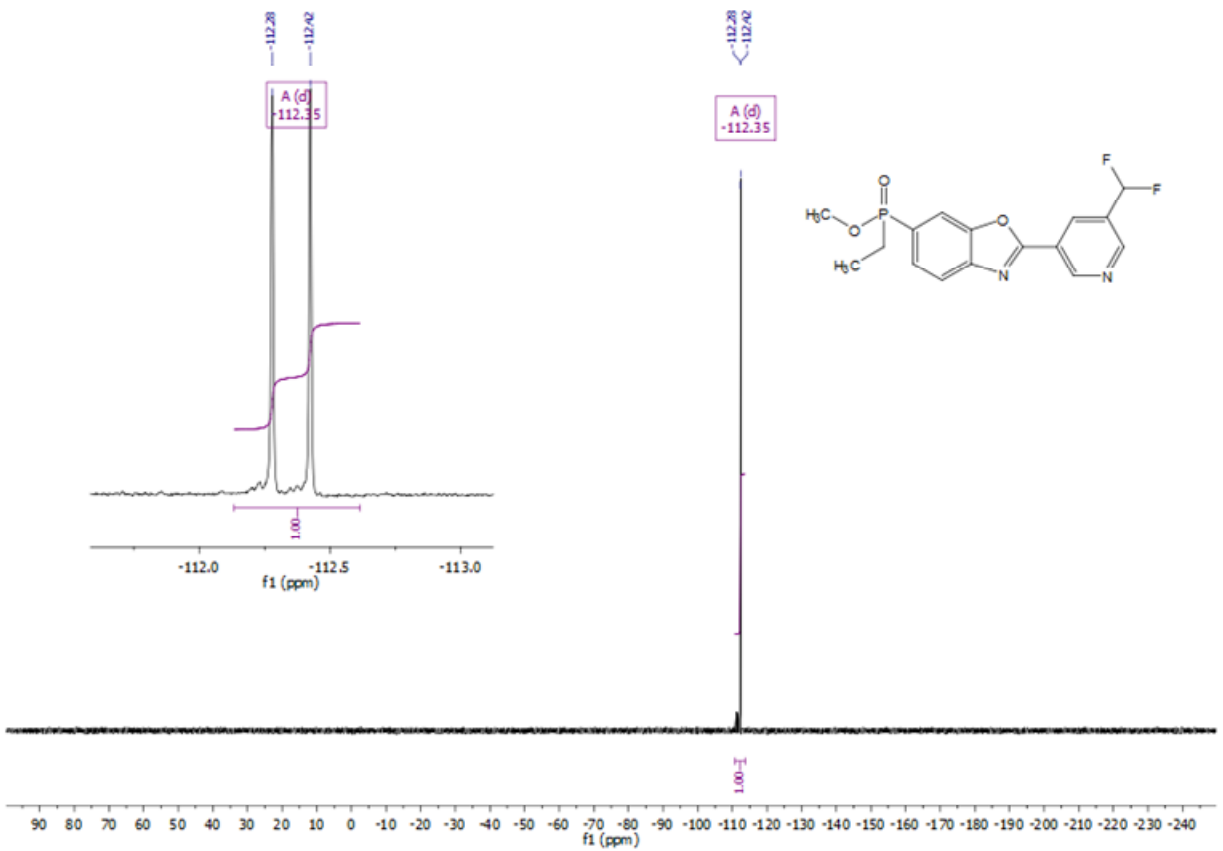

# 5-bromo-2-(4-(difluoromethyl)phenyl)benzo[d]oxazole (28)

## MS Spectrum

Group#1 - LC Peak: 6, RT: 1.29 to 1.43 min

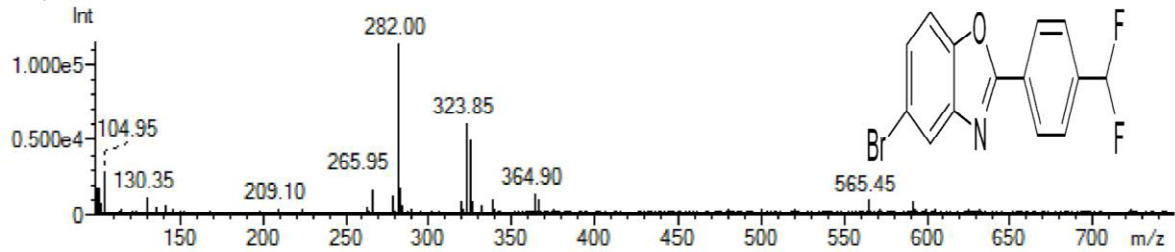

## PDA Chromatogram

1: Wavelength 215 nm, Band Width 4 nm

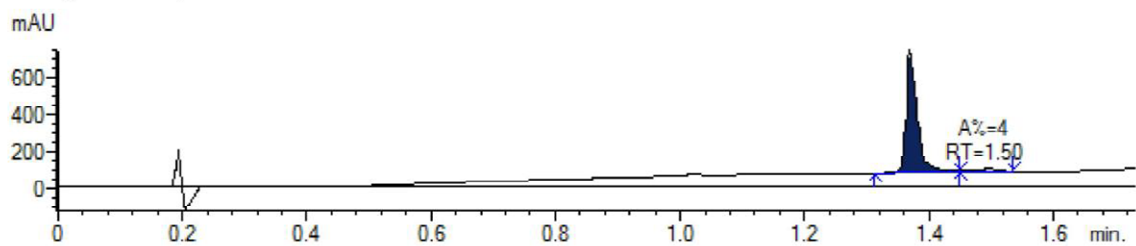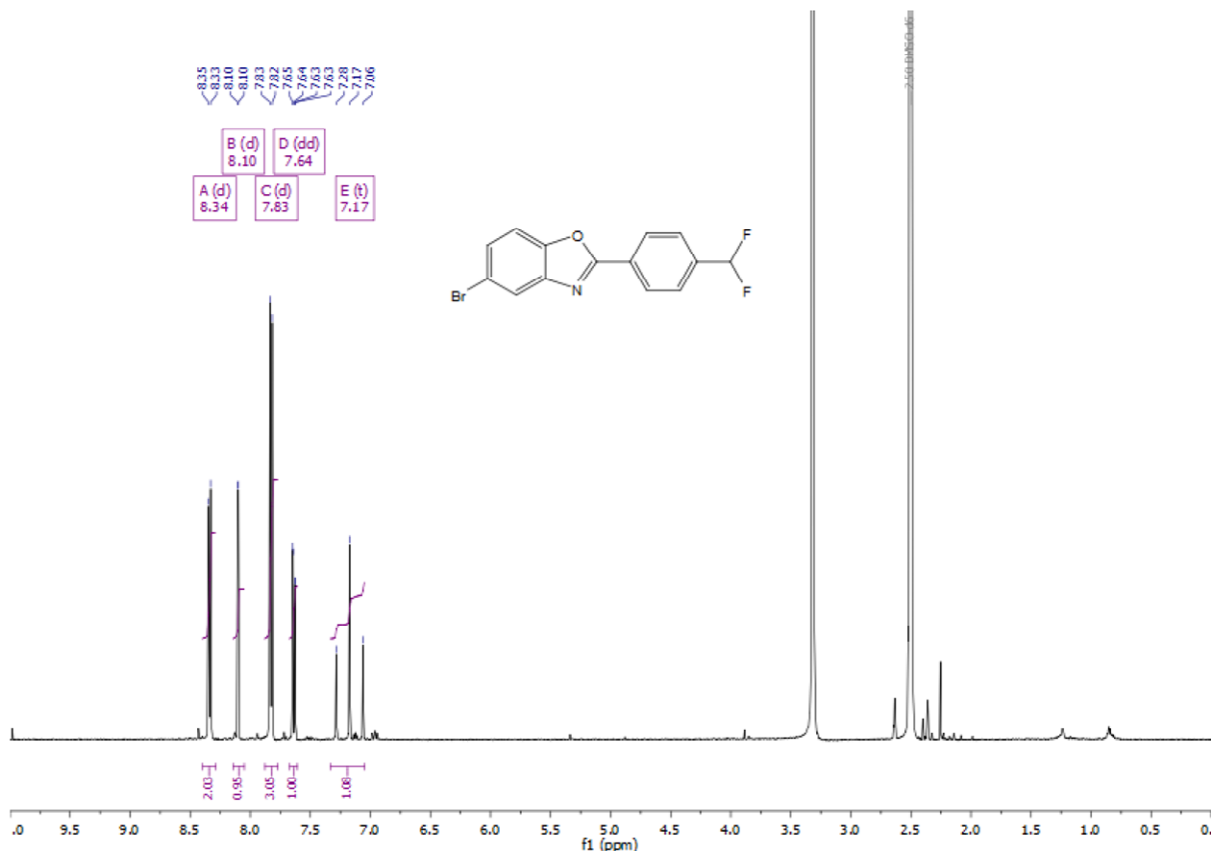

# 5-bromo-2-(4-methoxyphenyl)benzo[d]oxazole (29)

## PDA Chromatogram

1: Wavelength 215 nm, Band Width 4 nm

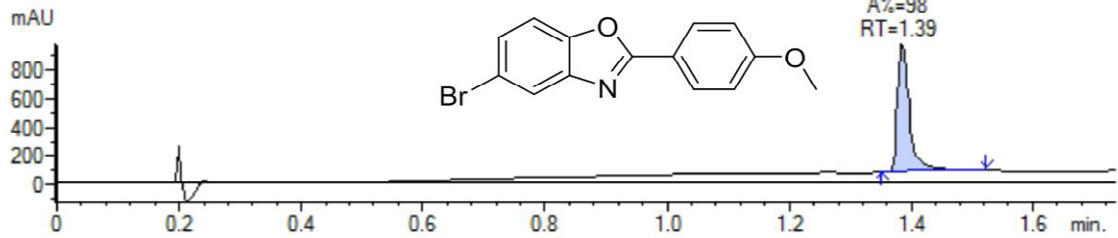

## MS Spectrum

Group#1 - PDA Peak: 8, RT: 1.35 to 1.52 min

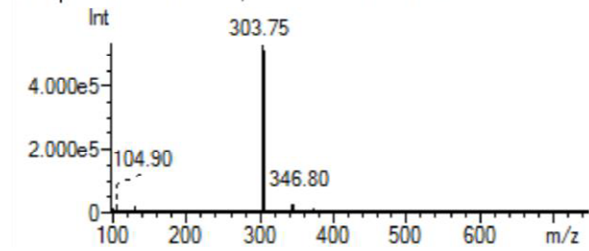

## MS Spectrum

Group#2 - PDA Peak: 8, RT: 1.35 to 1.52 min

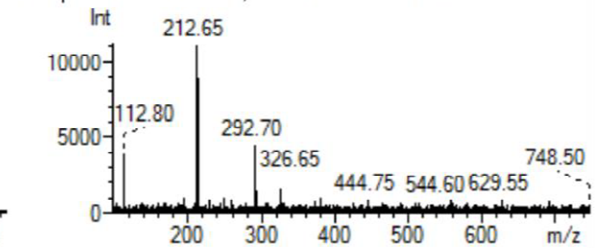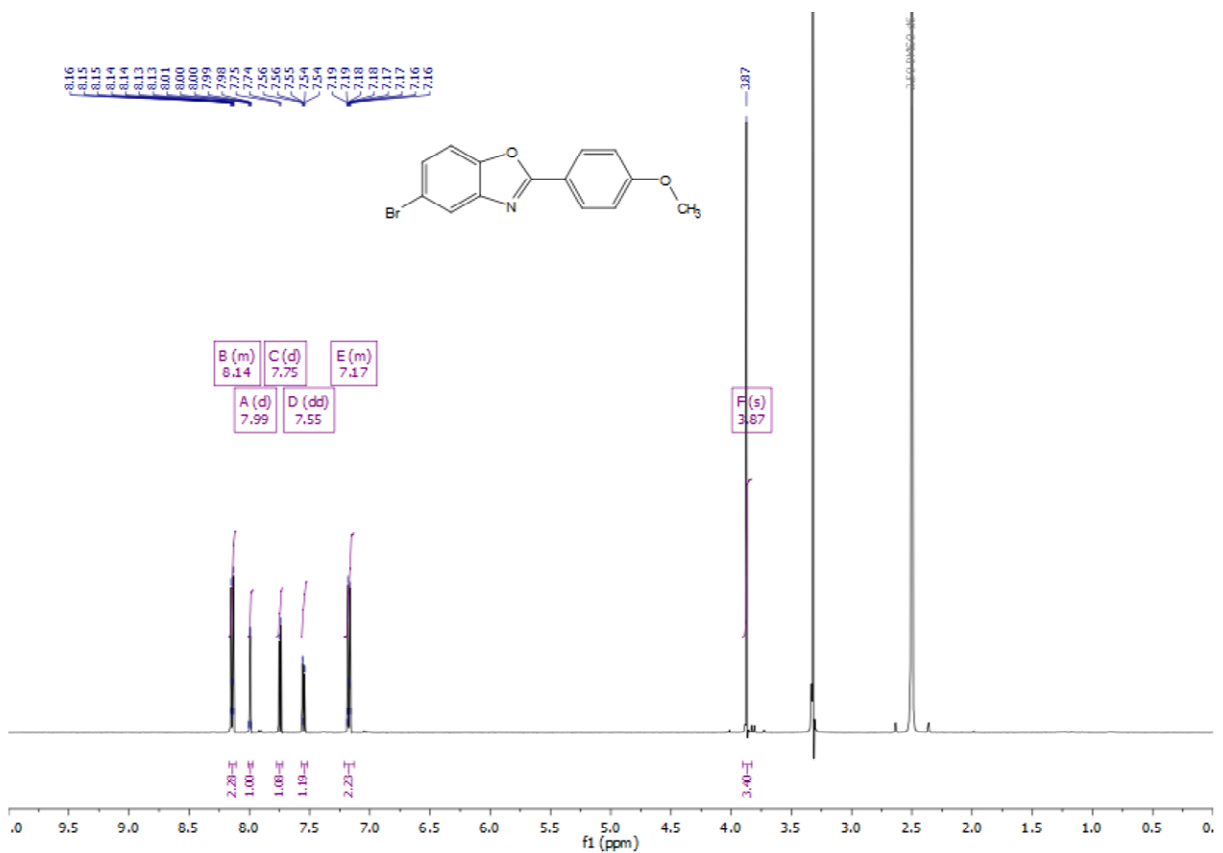

## 5-bromo-2-(3-(difluoromethoxy)phenyl)benzo[d]oxazole (30)

### MS Spectrum

Group#1 - PDA Peak: 6, RT: 1.36 to 1.49 min

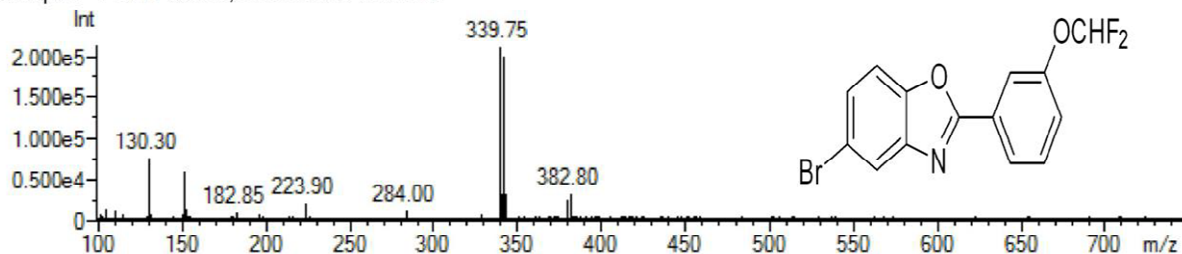

### PDA Chromatogram

1: Wavelength 215 nm, Band Width 4 nm

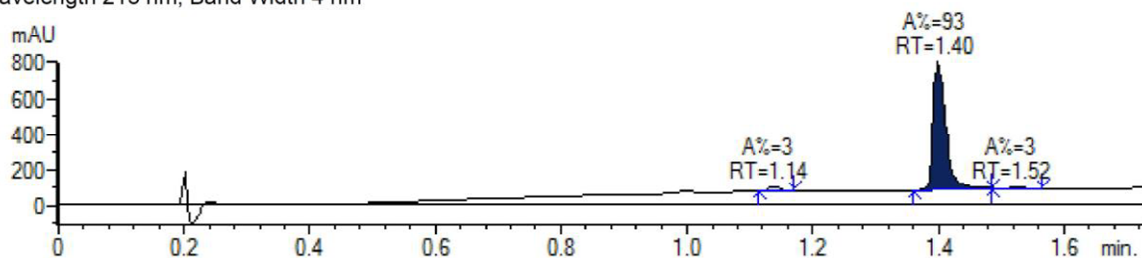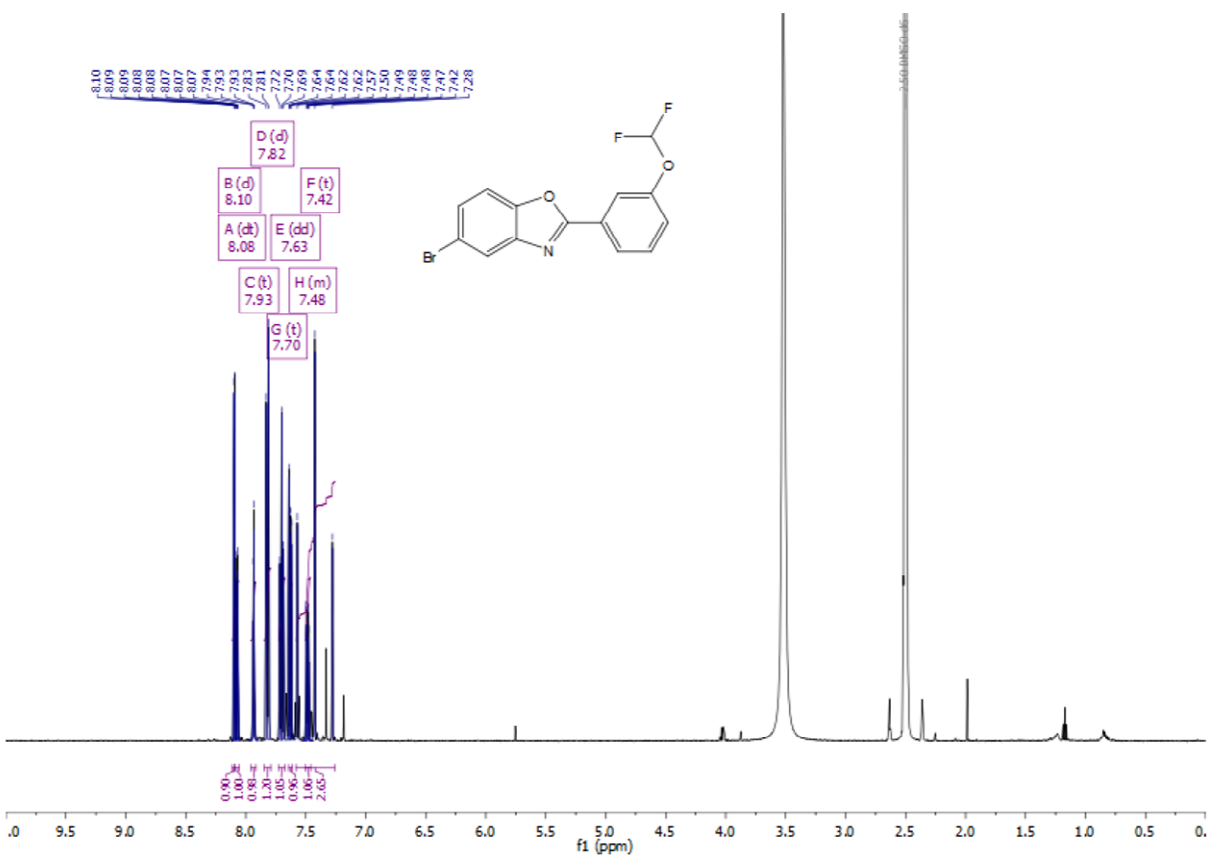

# 5-bromo-2-(2-(trifluoromethyl)pyridin-4-yl)benzo[d]oxazole (31)

## MS Spectrum

Group#1 - PDA Peak: 10, RT: 1.33 to 1.46 min

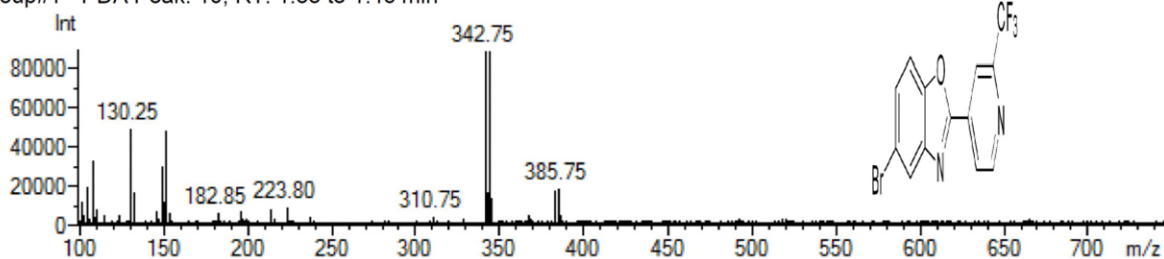

## PDA Chromatogram

1: Wavelength 215 nm, Band Width 4 nm

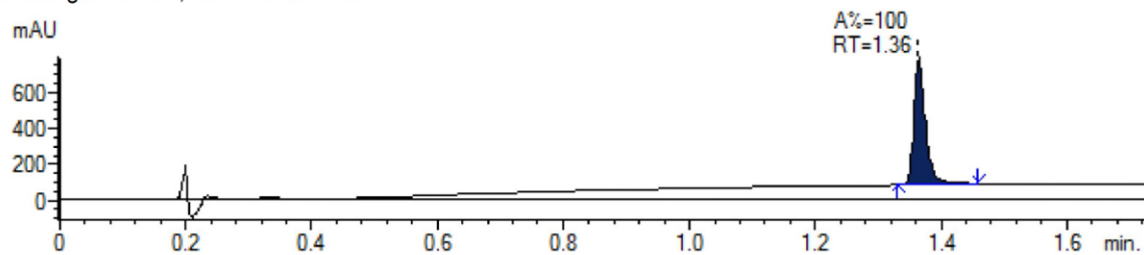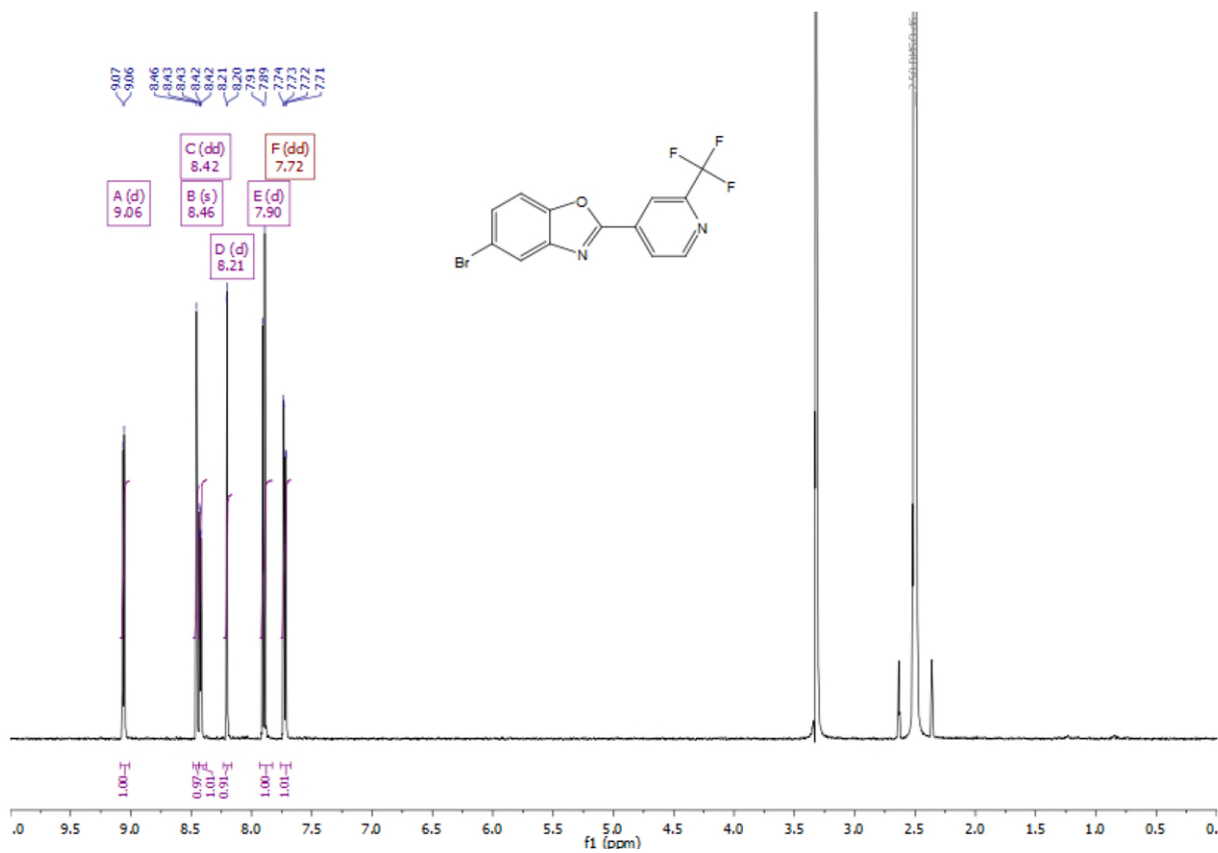

## 5-bromo-2-(2-(trifluoromethyl)pyridin-3-yl)benzo[d]oxazole (32)

### PDA Chromatogram

1: Wavelength 215 nm, Band Width 4 nm

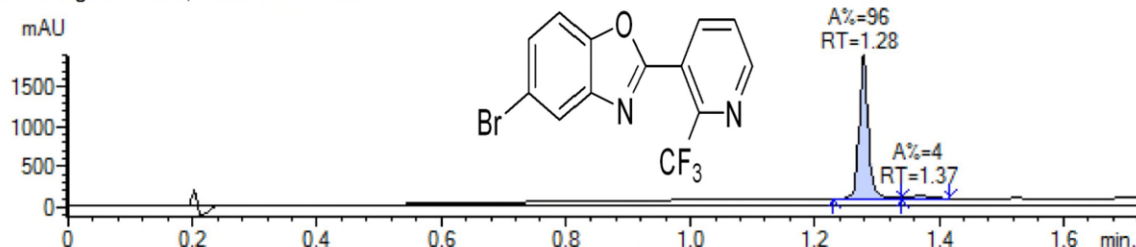

### MS Spectrum

Group#1 - PDA Peak: 6, RT: 1.23 to 1.34 min

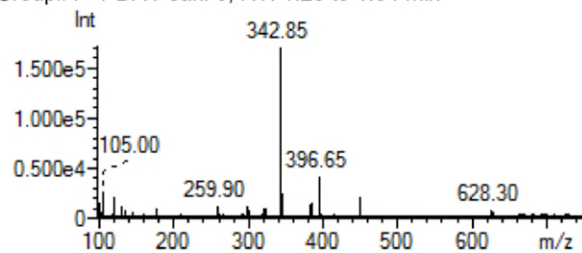

### MS Spectrum

Group#2 - PDA Peak: 6, RT: 1.23 to 1.34 min

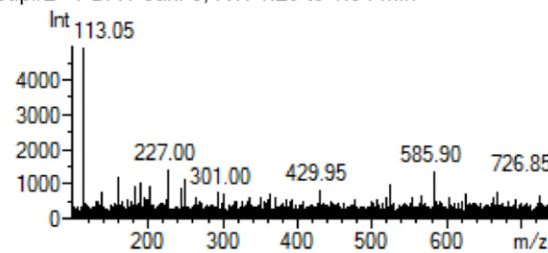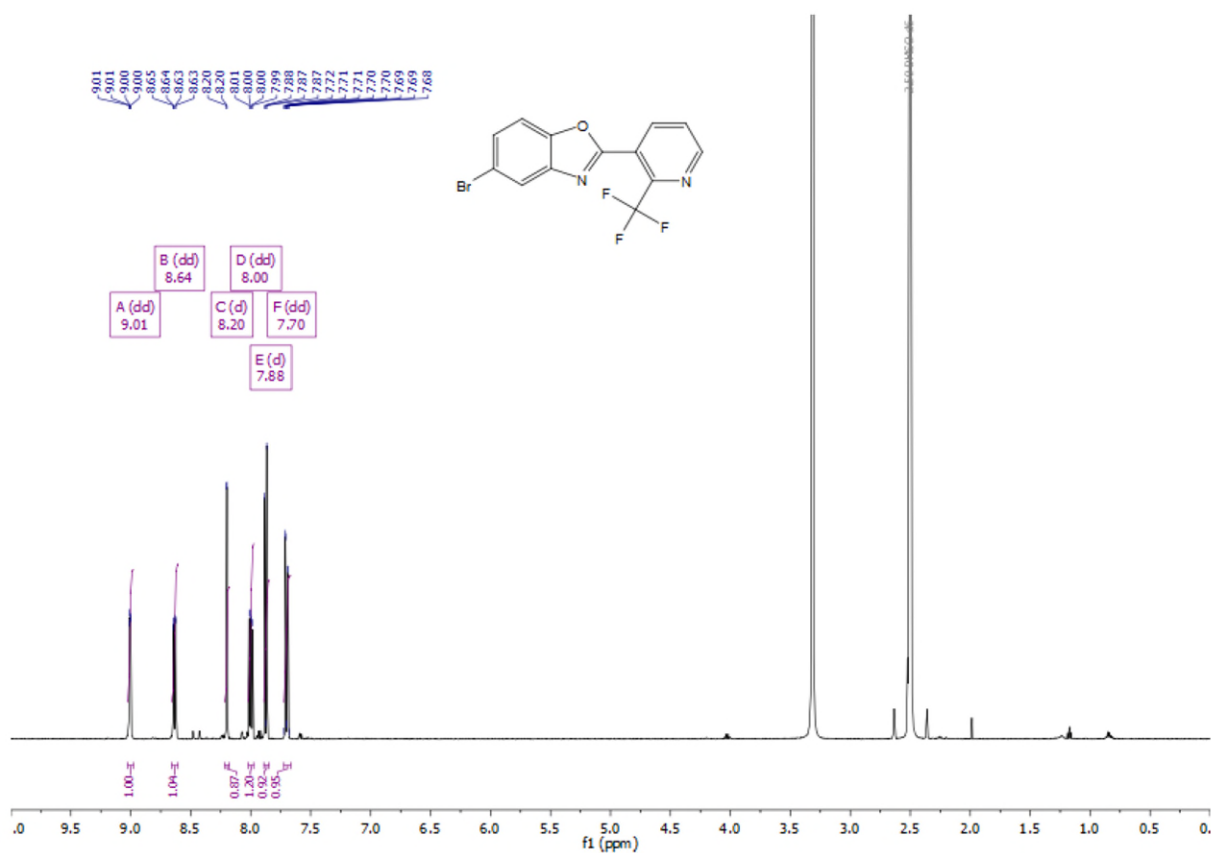

## 6-bromo-2-(2-(difluoromethyl)phenyl)benzo[d]oxazole (33)

### MS Spectrum

Group#1 - PDA Peak: 10, RT: 1.35 to 1.45 min

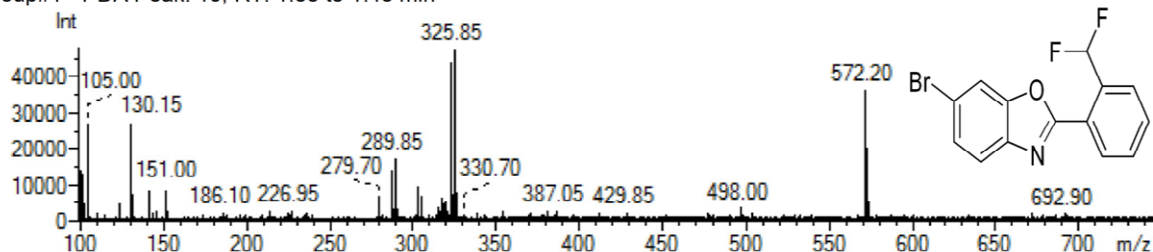

### PDA Chromatogram

1: Wavelength 215 nm, Band Width 4 nm

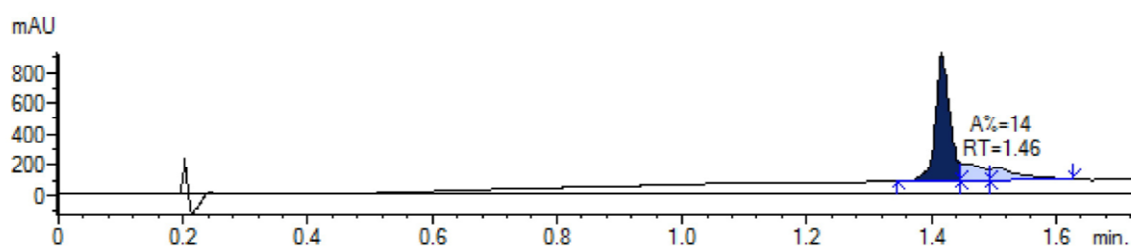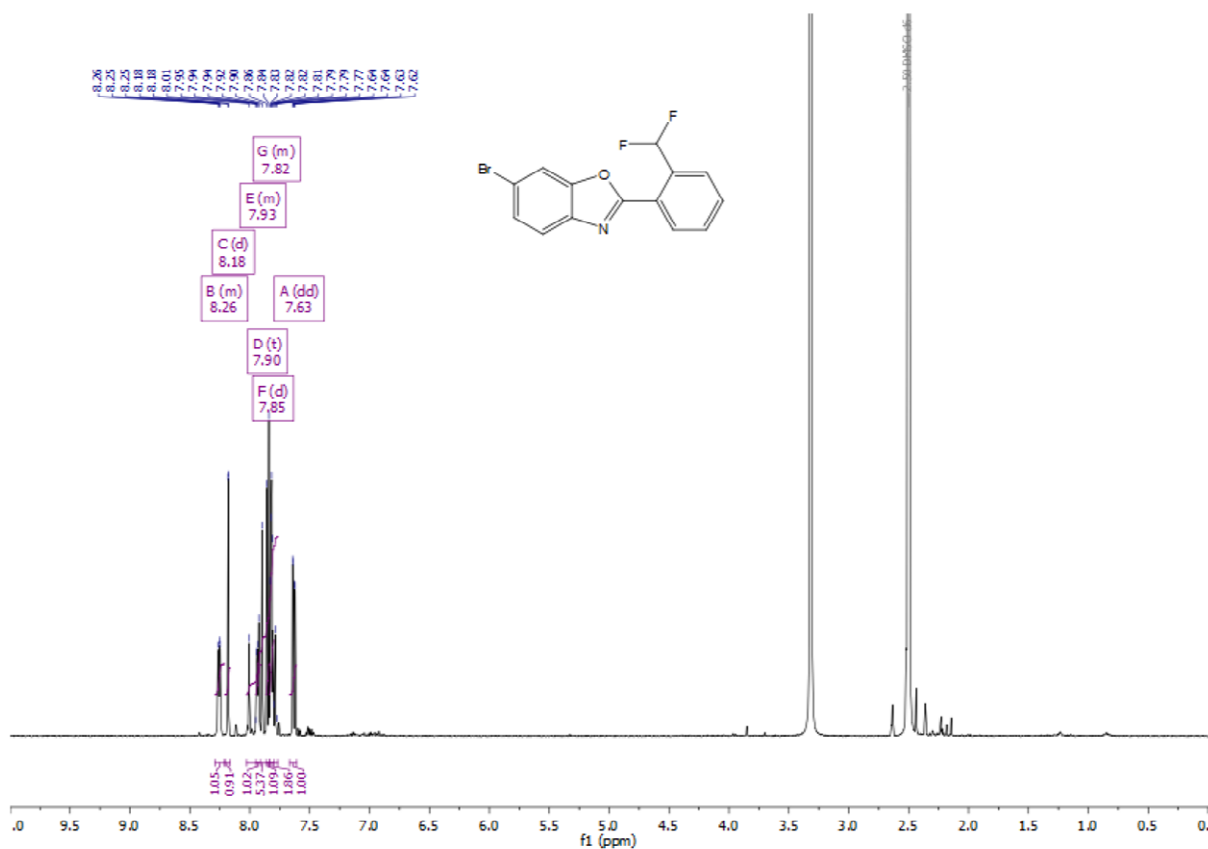



## 6-bromo-2-(4-(difluoromethyl)phenyl)benzo[d]oxazole (34)

### MS Spectrum

Group#1 - PDA Peak: 9, RT: 1.35 to 1.47 min

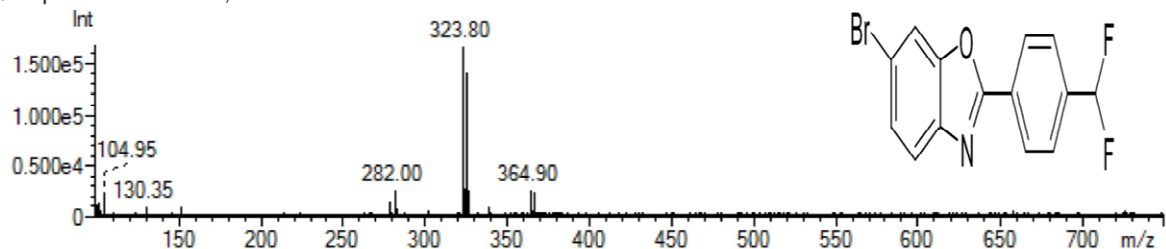

### PDA Chromatogram

1: Wavelength 215 nm, Band Width 4 nm

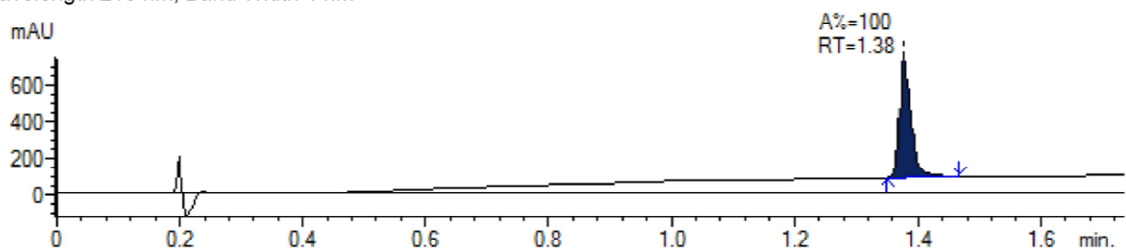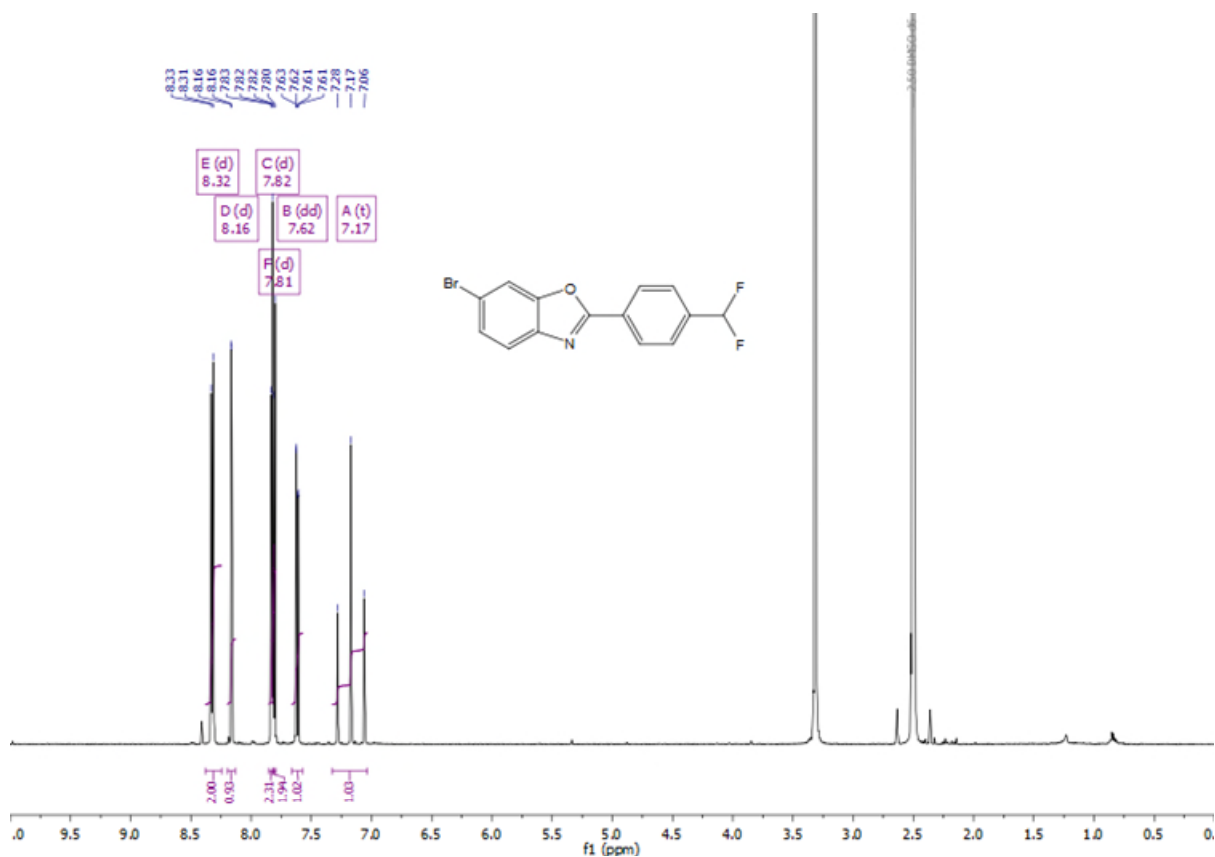

6-bromo-2-(3-(difluoromethoxy)phenyl)benzo[d]oxazole (35)

PDA Chromatogram

1: Wavelength 215 nm, Band Width 4 nm

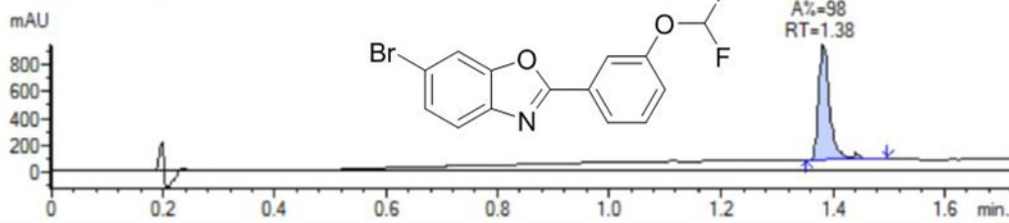

MS Spectrum

Group#1 - PDA Peak: 6, RT: 1.35 to 1.50 min

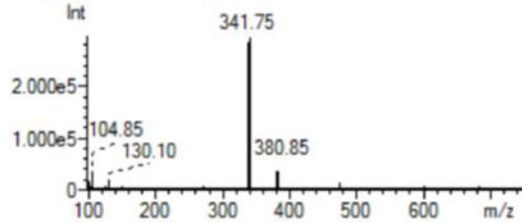

MS Spectrum

Group#2 - PDA Peak: 6, RT: 1.35 to 1.50 min

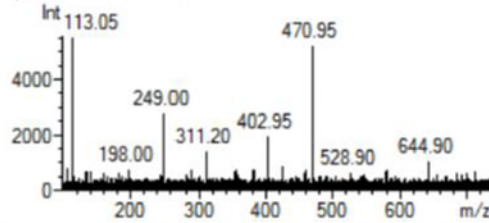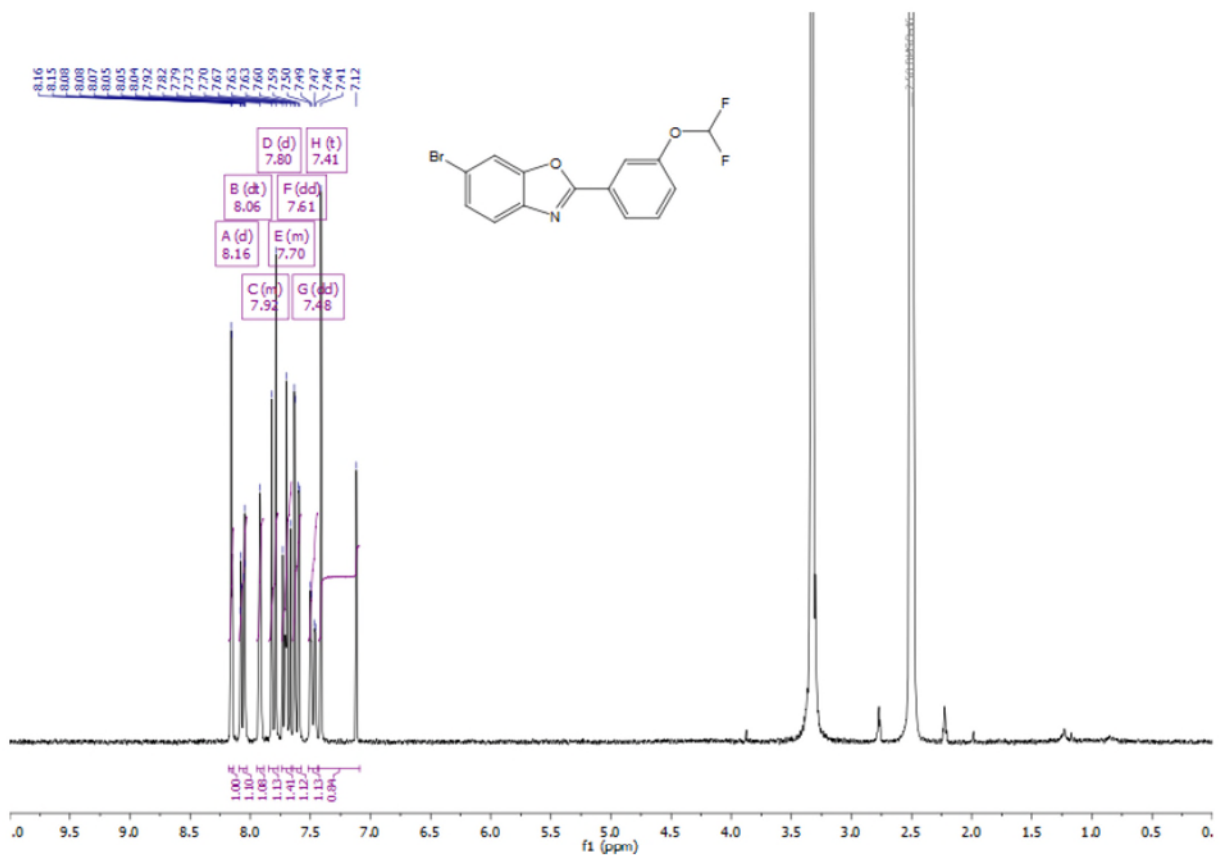

## 6-bromo-2-(2-(trifluoromethyl)pyridin-3-yl)benzo[d]oxazole (36)

### PDA Chromatogram

1: Wavelength 215 nm, Band Width 4 nm

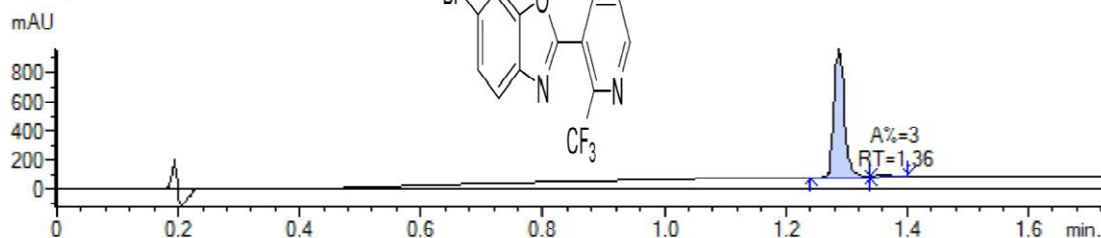

### MS Spectrum

Group#1 - PDA Peak: 9, RT: 1.24 to 1.34 min

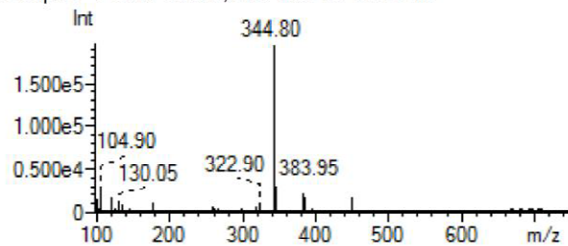

### MS Spectrum

Group#2 - PDA Peak: 9, RT: 1.24 to 1.34 min

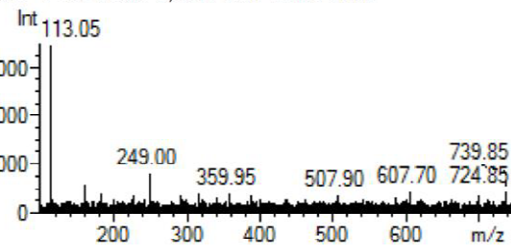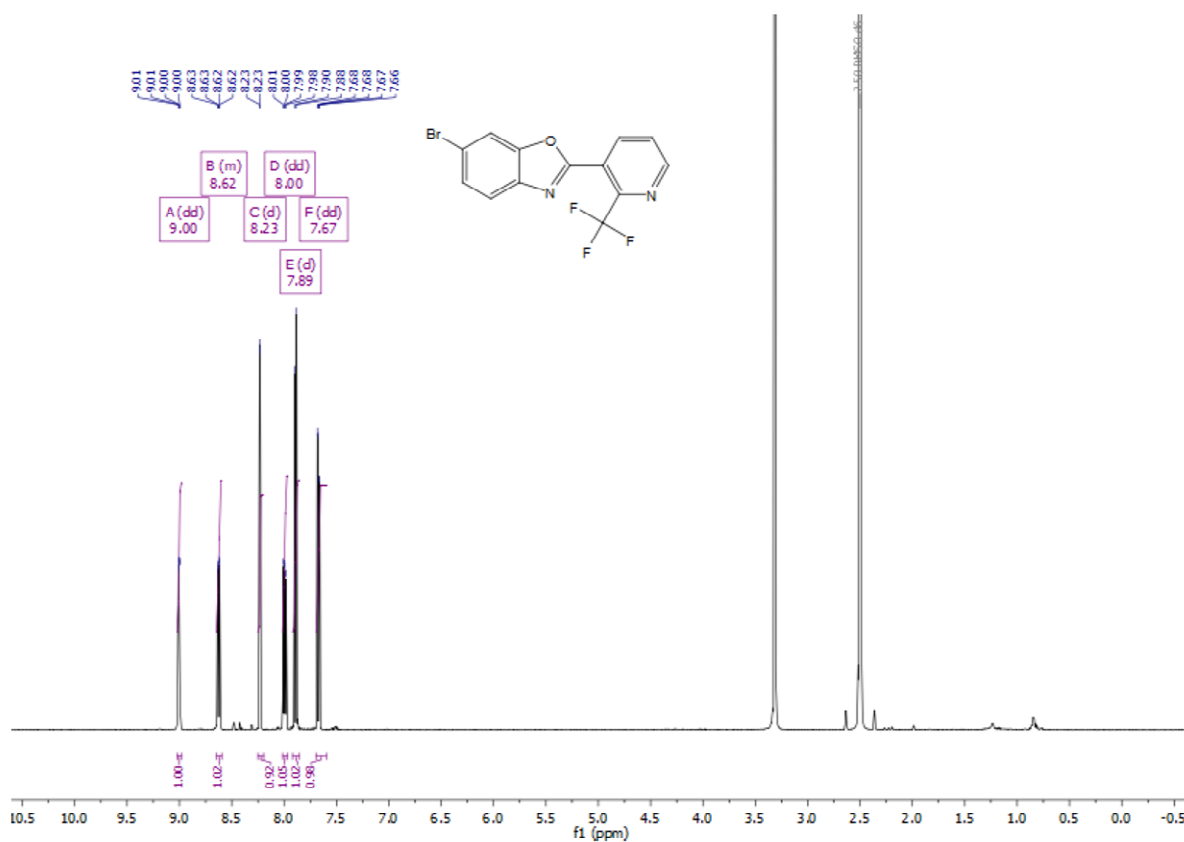

# (2-(4-(difluoromethyl)phenyl)benzo[d]oxazol-5-yl)(ethyl)phosphinic acid (37)

## MS Spectrum

Group#1 - PDA Peak: 7, RT: 1.01 to 1.15 min

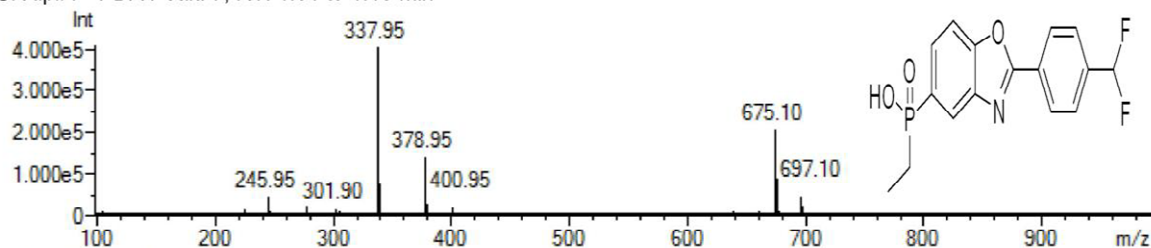

## PDA Chromatogram

1: Wavelength 215 nm, Band Width 4 nm

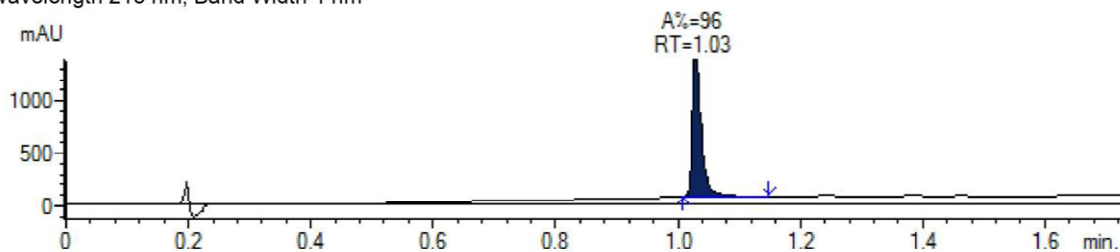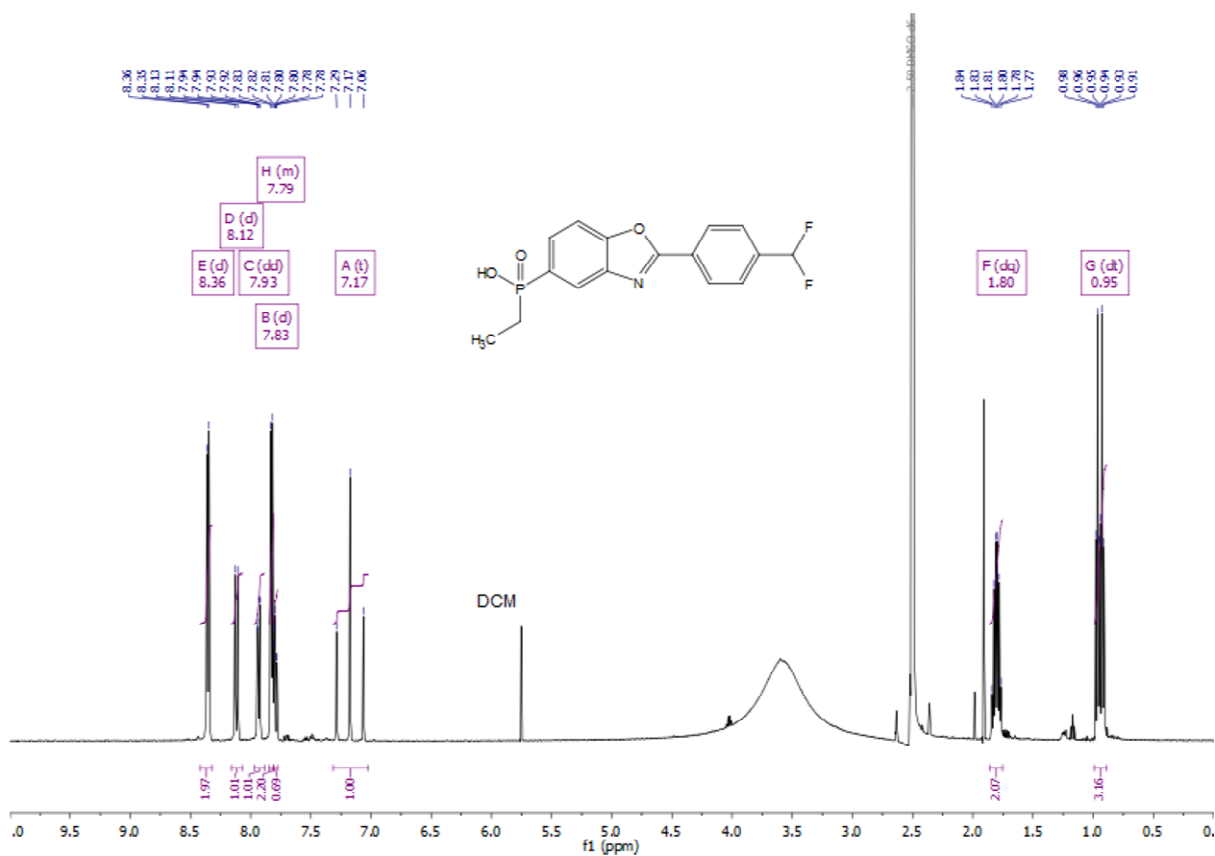

ethyl(2-(4-methoxyphenyl)benzo[d]oxazol-5-yl)phosphinic acid (38)

**PDA Chromatogram**

1: Wavelength 215 nm, Band Width 4 nm

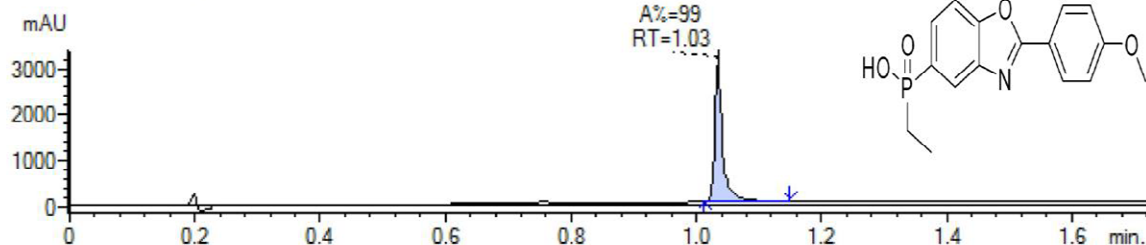

**MS Spectrum**

Group#1 - PDA Peak: 4, RT: 1.01 to 1.15 min

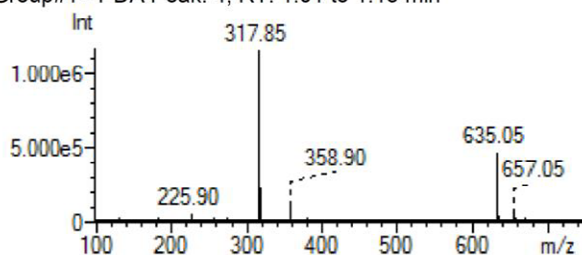

**MS Spectrum**

Group#2 - PDA Peak: 4, RT: 1.01 to 1.15 min

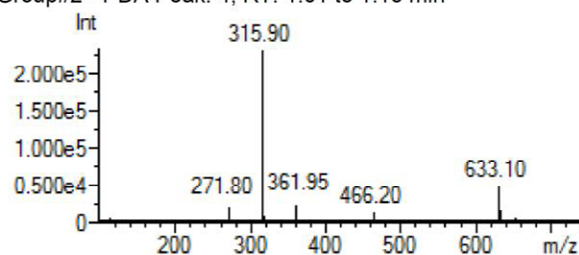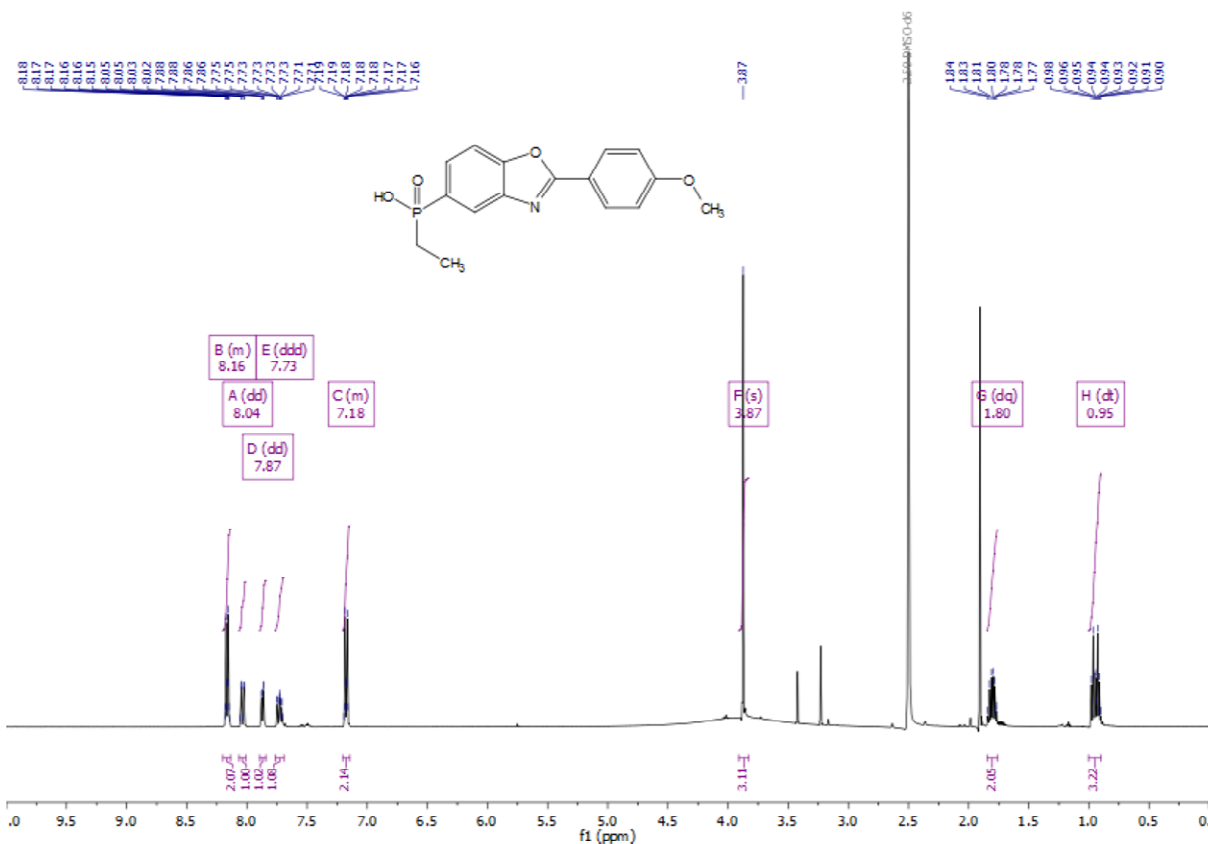

**(2-(3-(difluoromethoxy)phenyl)benzo[d]oxazol-5-yl)(ethyl)phosphinic acid (39)**

**MS Spectrum**

Group#1 - PDA Peak: 5, RT: 1.02 to 1.19 min

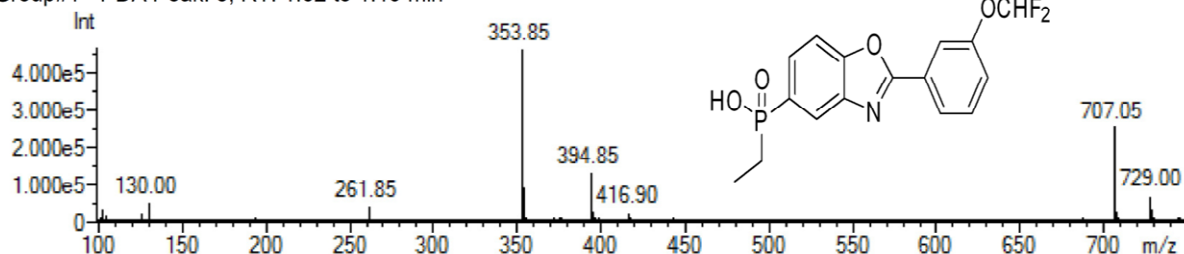

**PDA Chromatogram**

1: Wavelength 215 nm, Band Width 4 nm

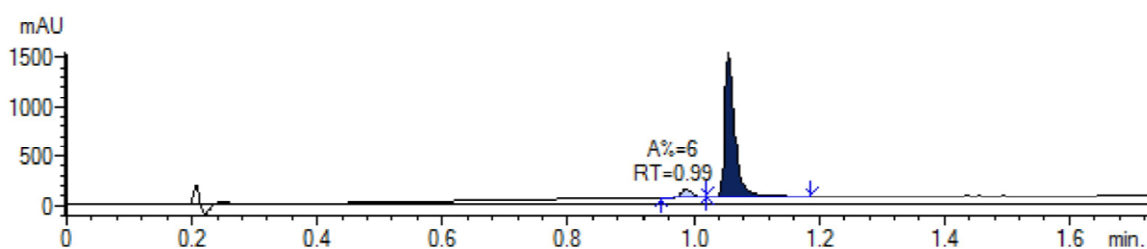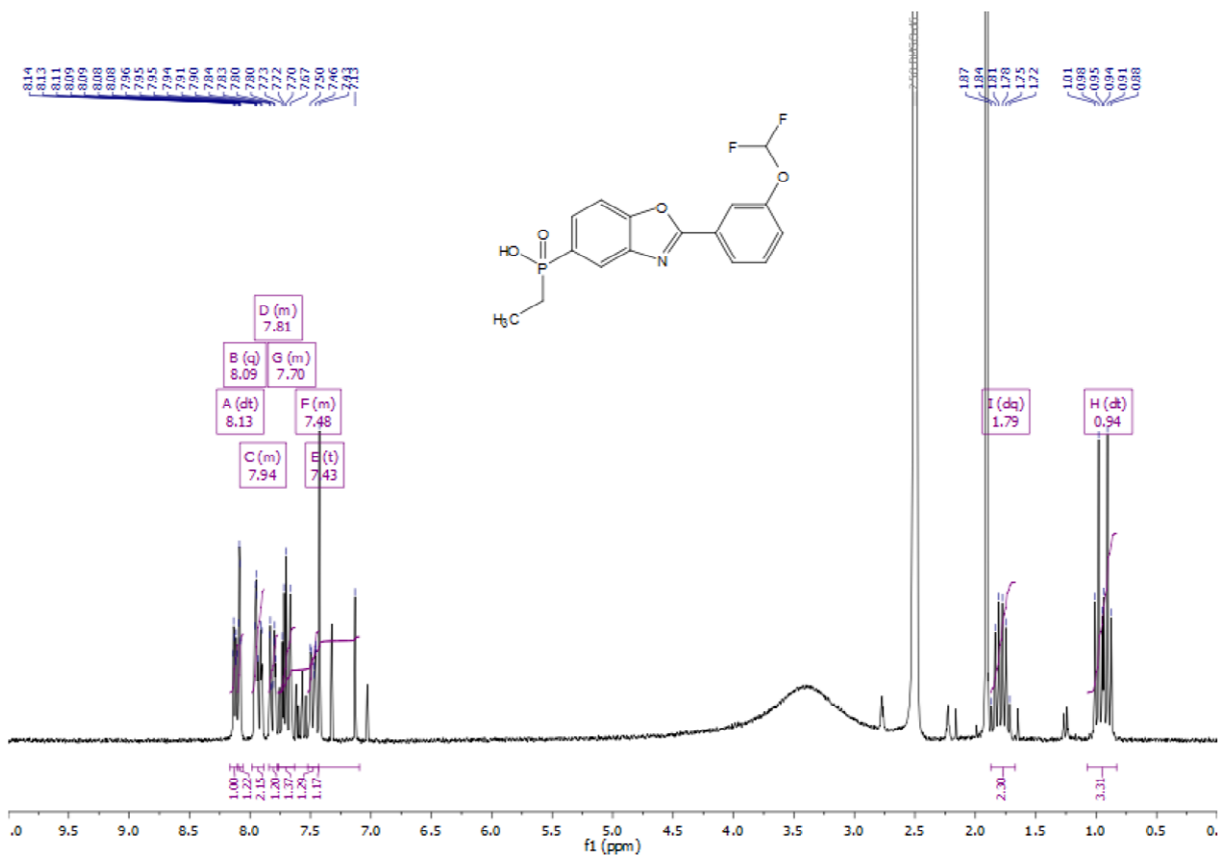

ethyl(2-(2-(trifluoromethyl)pyridin-4-yl)benzo[d]oxazol-5-yl)phosphinic acid (40)

**MS Spectrum**

Group#1 - PDA Peak: 3, RT: 0.98 to 1.12 min

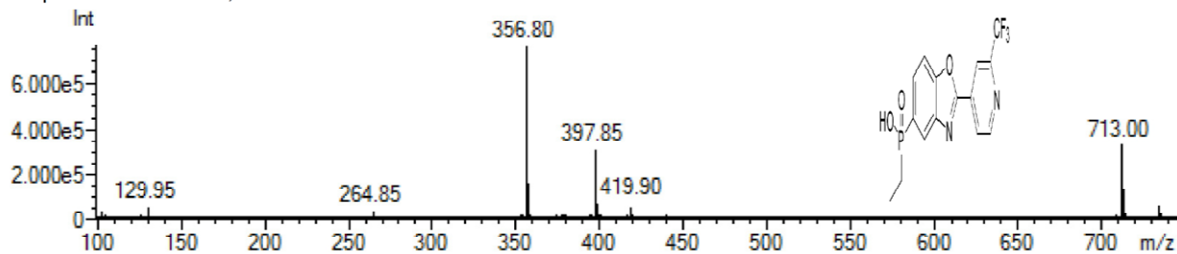

**PDA Chromatogram**

1: Wavelength 215 nm, Band Width 4 nm

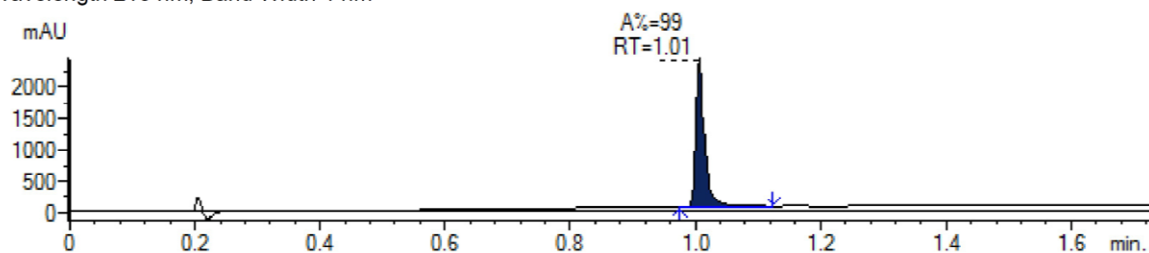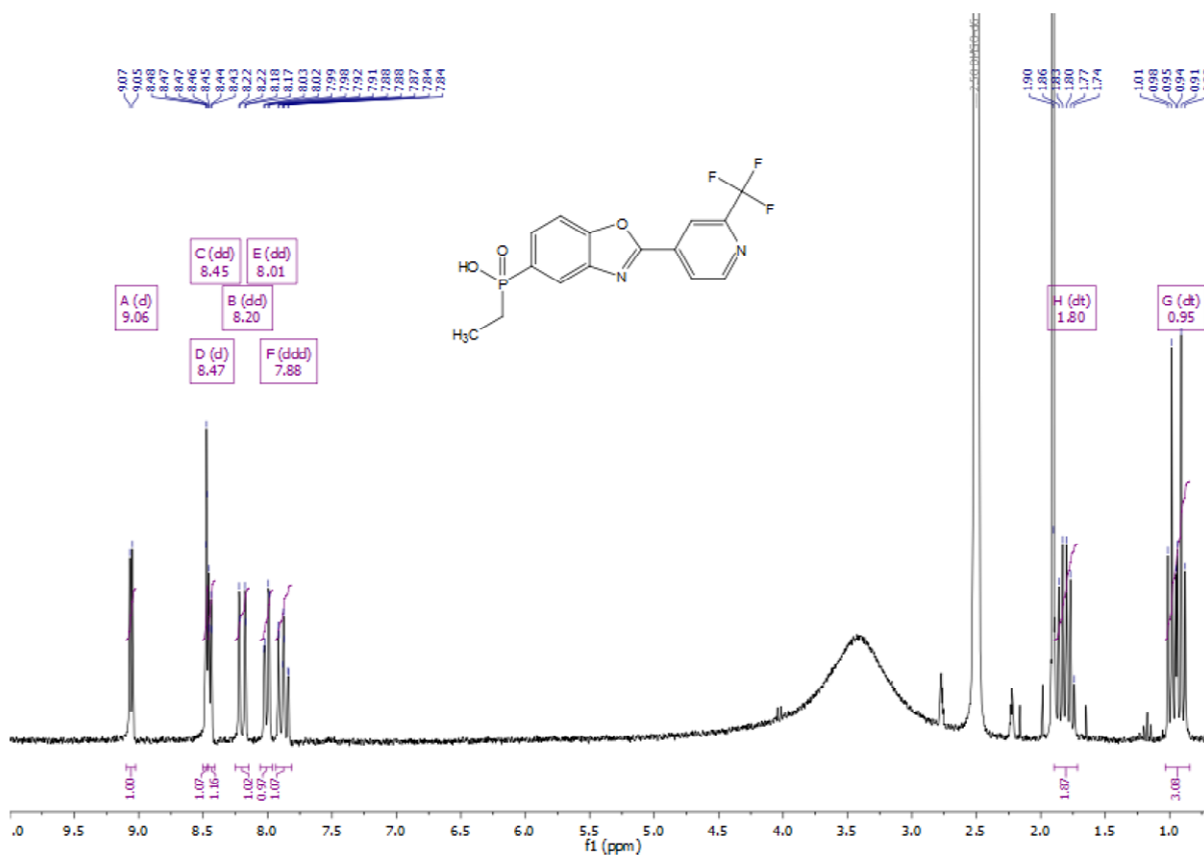

ethyl(2-(2-(trifluoromethyl)pyridin-3-yl)benzo[d]oxazol-5-yl)phosphinic acid (41)

**PDA Chromatogram**

1: Wavelength 215 nm, Band Width 4 nm

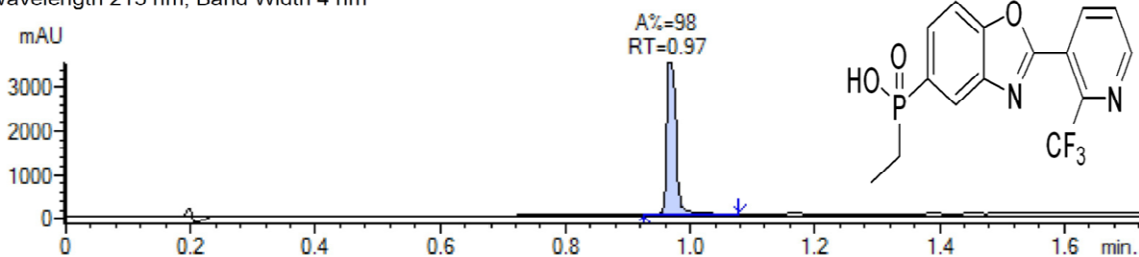

**MS Spectrum**

Group#1 - PDA Peak: 6, RT: 0.93 to 1.08 min

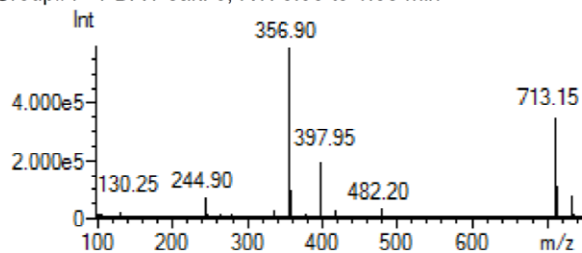

**MS Spectrum**

Group#2 - PDA Peak: 6, RT: 0.93 to 1.08 min

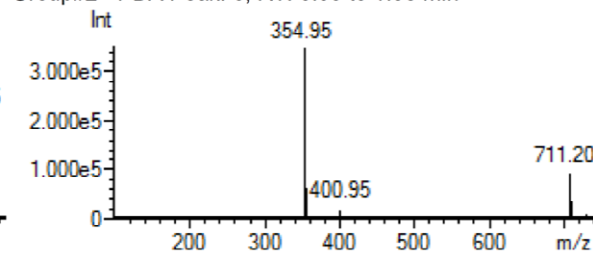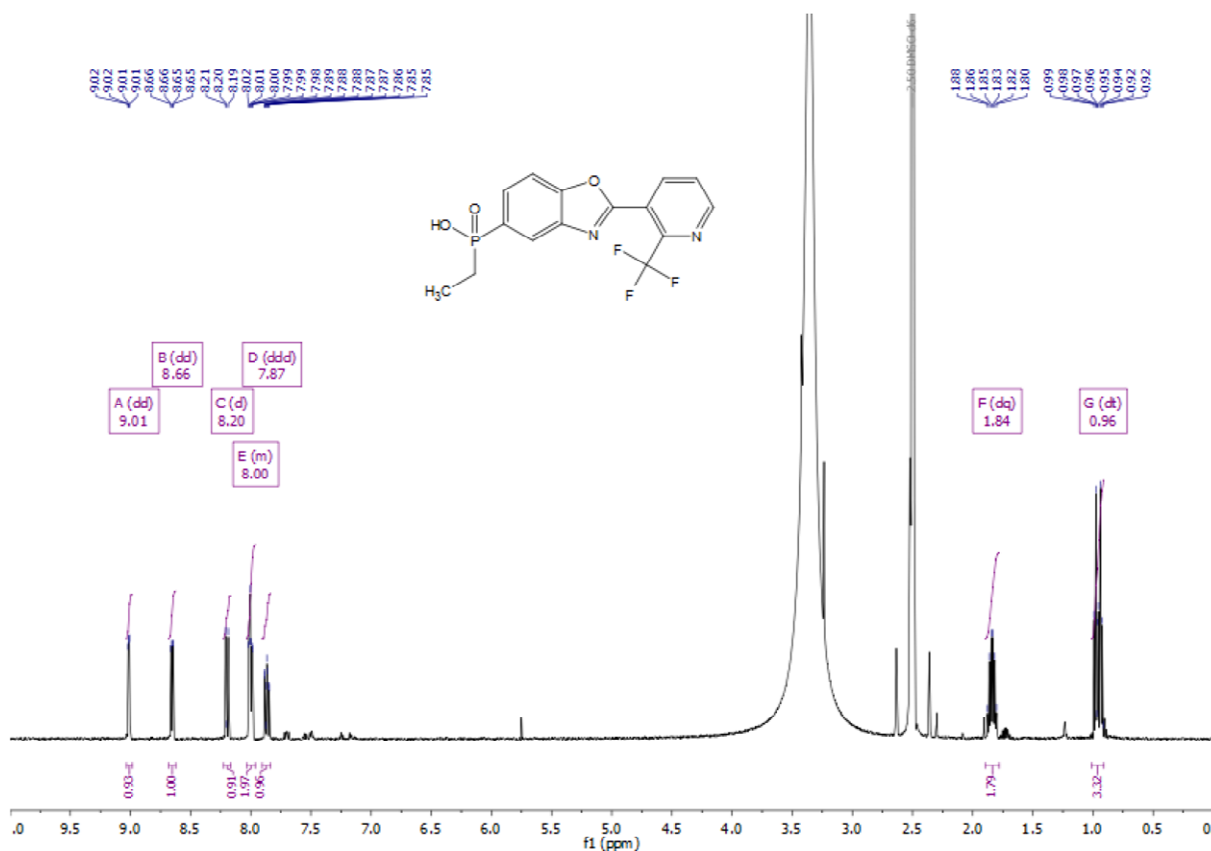



**(2-(2-(difluoromethyl)phenyl)benzo[d]oxazol-6-yl)(ethyl)phosphinic acid (42)**

**MS Spectrum**

Group#1 - PDA Peak: 6, RT: 1.02 to 1.21 min

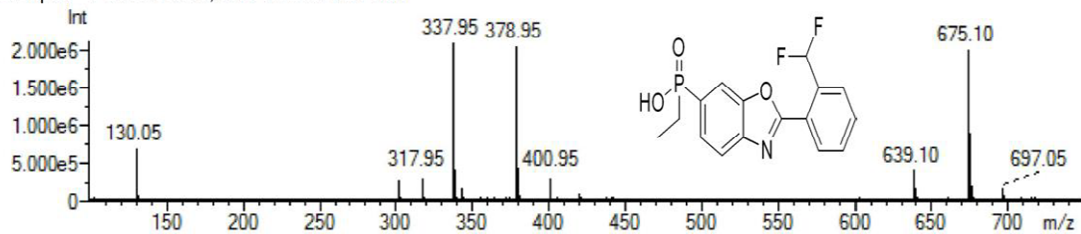

**PDA Chromatogram**

1: Wavelength 215 nm, Band Width 4 nm

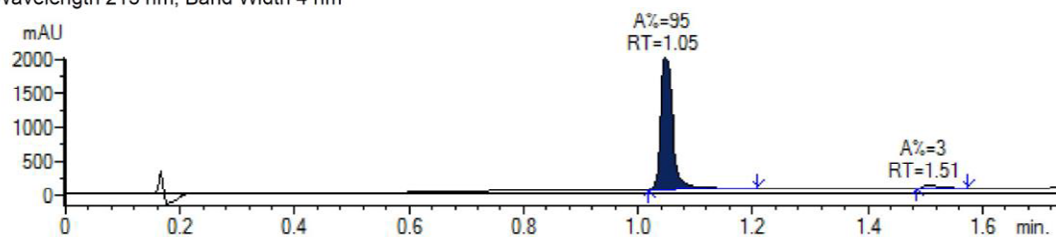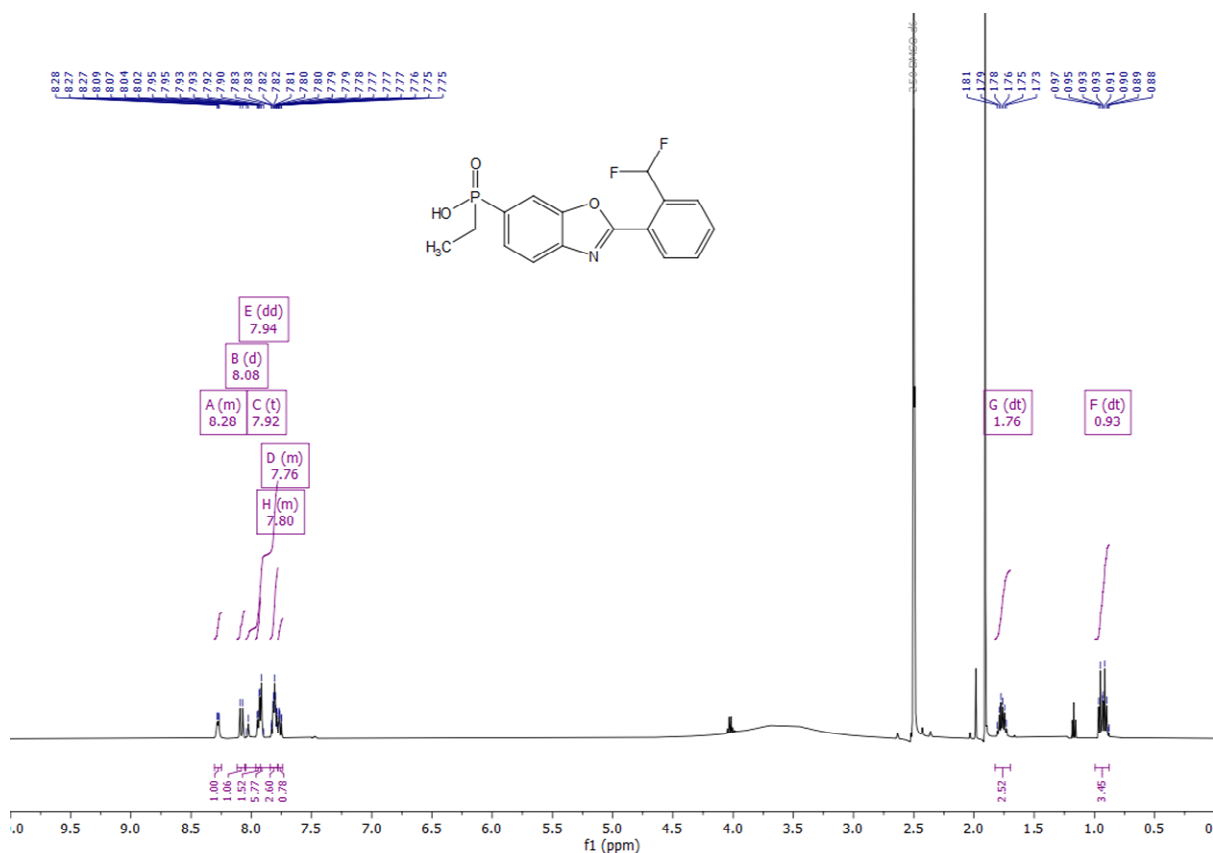

**(2-(4-(difluoromethyl)phenyl)benzo[d]oxazol-6-yl)(ethyl)phosphinic acid (43)**

**MS Spectrum**

Group#1 - PDA Peak: 8, RT: 1.00 to 1.13 min

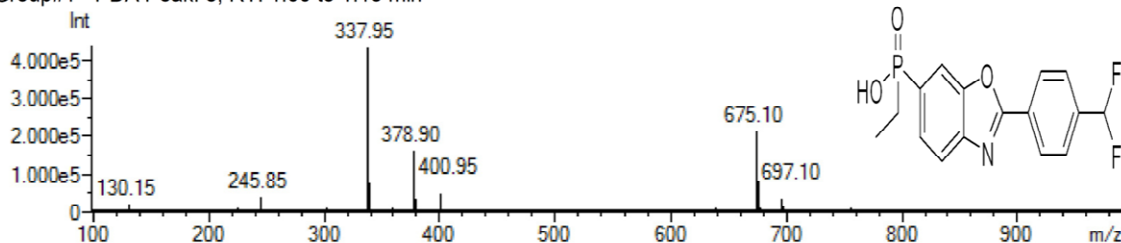

**PDA Chromatogram**

1: Wavelength 215 nm, Band Width 4 nm

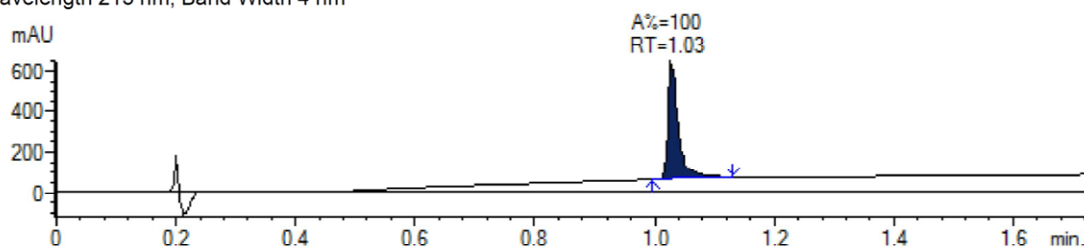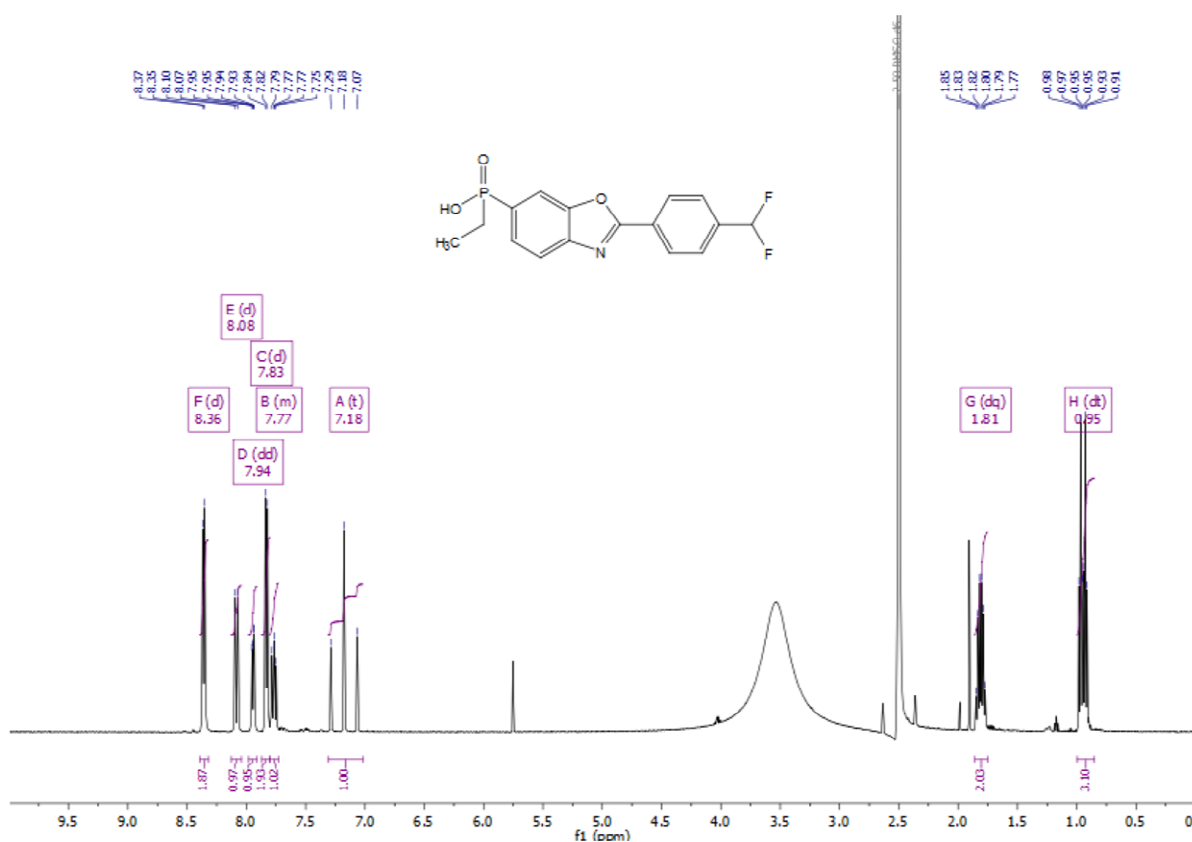



ethyl(2-(2-(trifluoromethyl)pyridin-3-yl)benzo[d]oxazol-6-yl)phosphinic acid (45)

**PDA Chromatogram**

1: Wavelength 215 nm, Band Width 4 nm

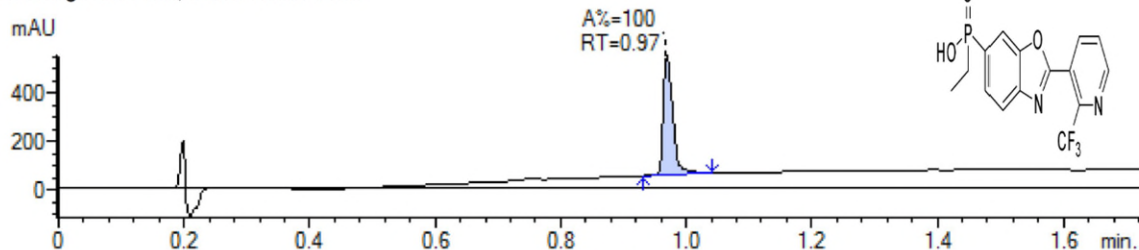

**MS Spectrum**

Group#1 - PDA Peak: 5, RT: 0.93 to 1.04 min

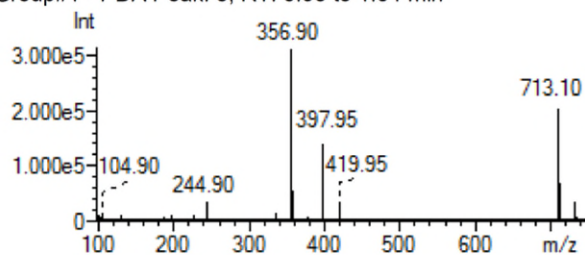

**MS Spectrum**

Group#2 - PDA Peak: 5, RT: 0.93 to 1.04 min

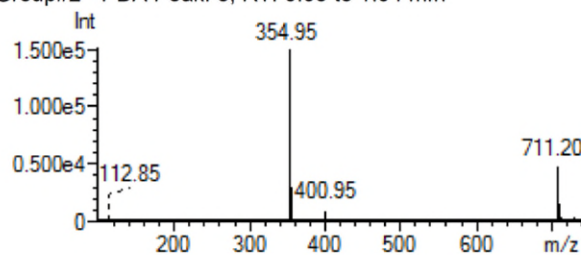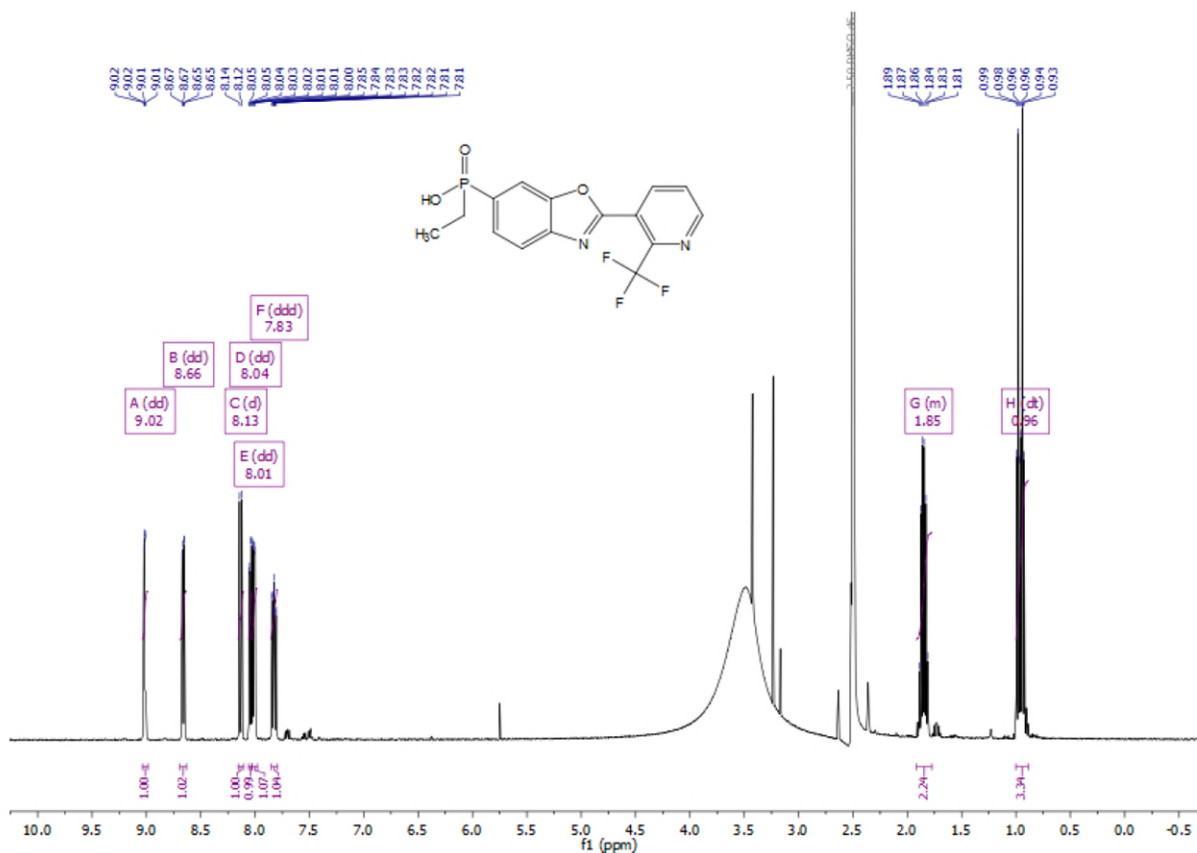

**methyl (2-(4-(difluoromethyl)phenyl)benzo[d]oxazol-5-yl)(ethyl)phosphinate (46)**

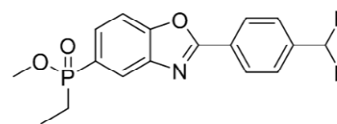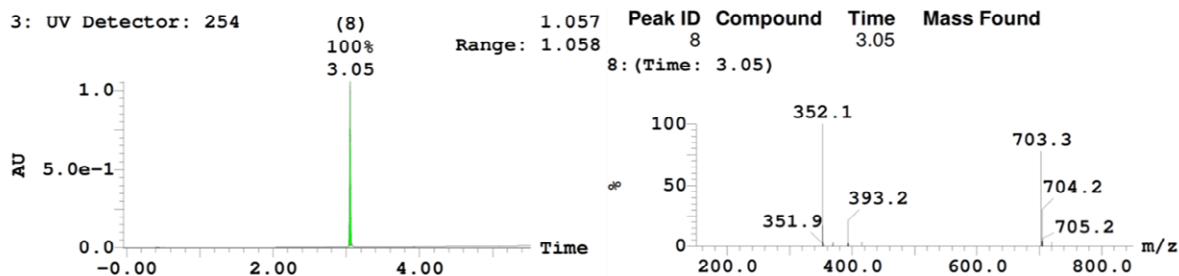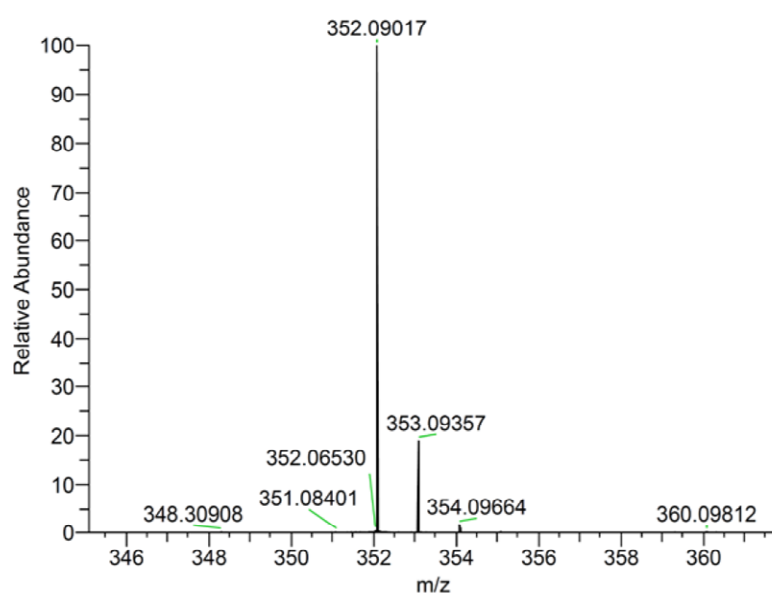

Measured  
Spectrum

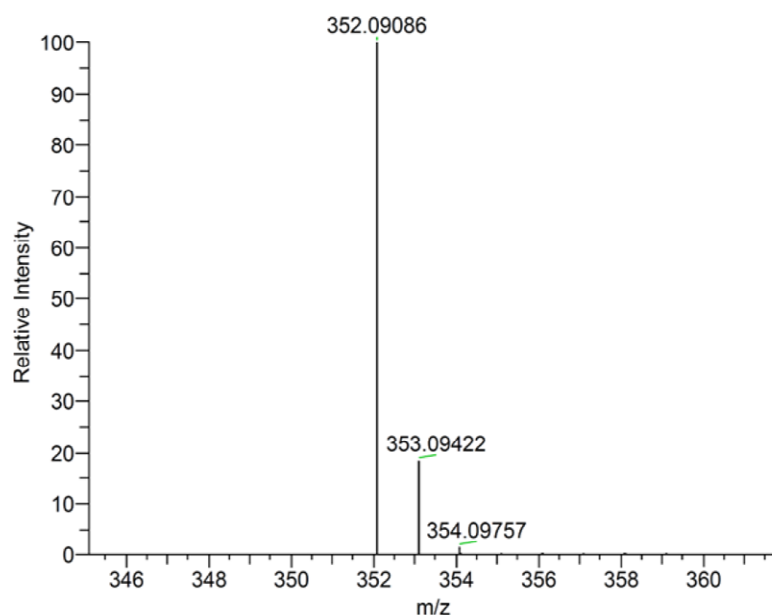

Theoretical  
Spectrum

| m/z       | Formula                                                          | RDB | Delta ppm | Theo. Mass |
|-----------|------------------------------------------------------------------|-----|-----------|------------|
| 352.09018 | C <sub>17</sub> H <sub>17</sub> O <sub>3</sub> NF <sub>2</sub> P | 9.5 | -1.94     | 352.09086  |



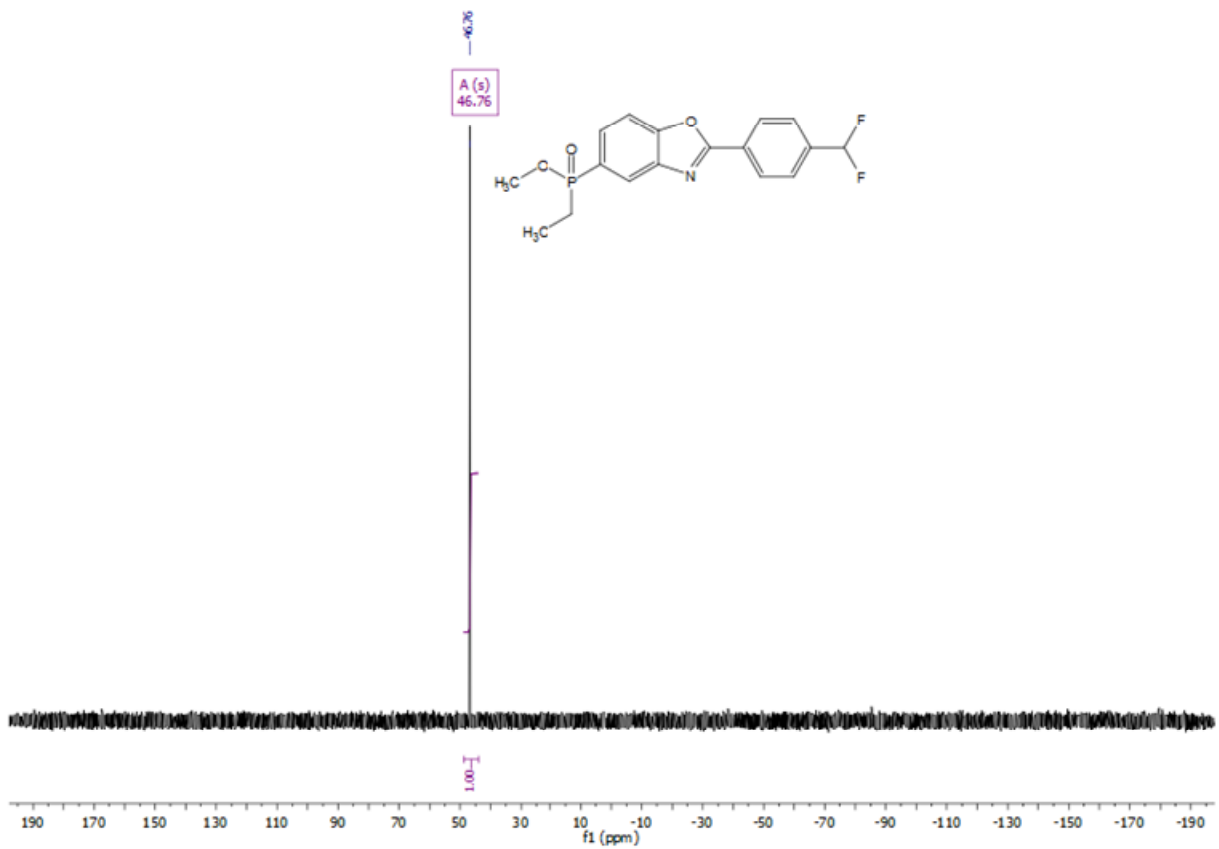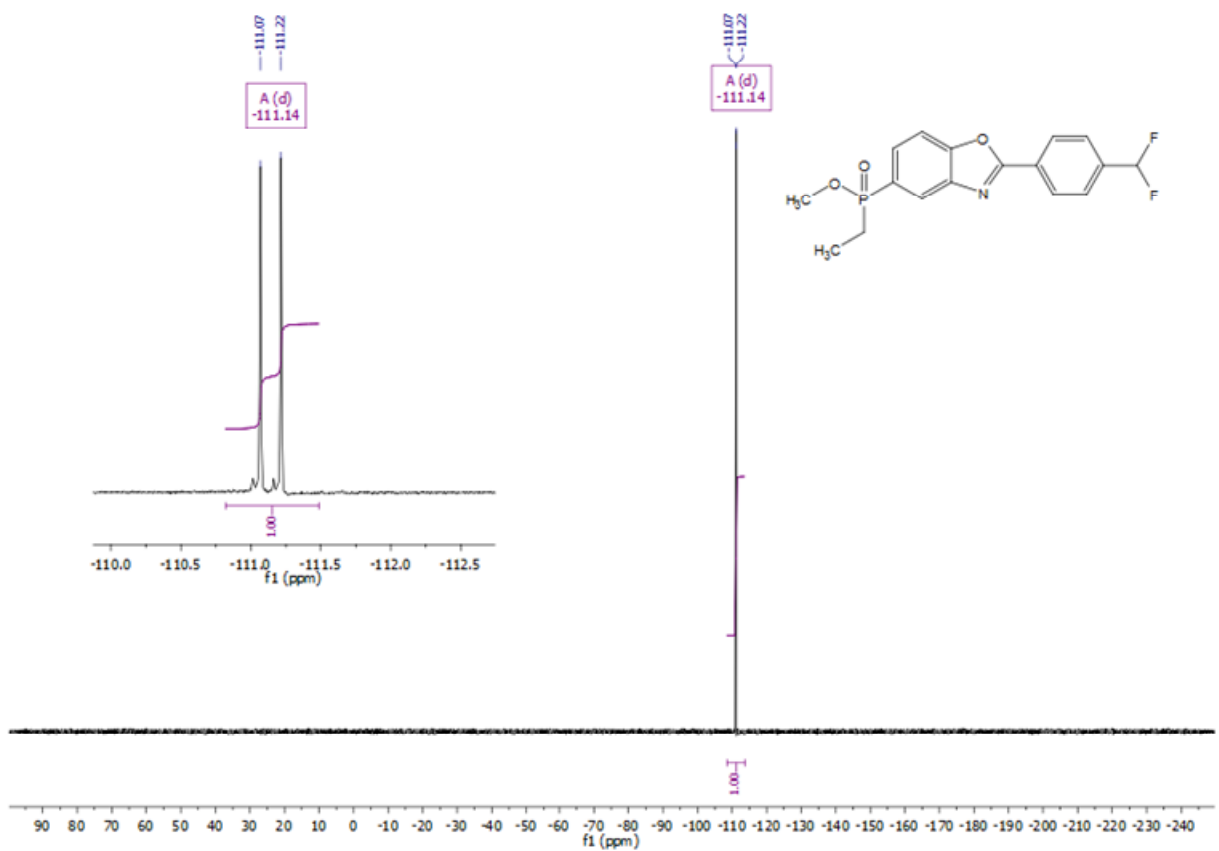

# methyl ethyl(2-(4-methoxyphenyl)benzo[d]oxazol-5-yl)phosphinate (47)

## PDA Chromatogram

1: Wavelength 215 nm, Band Width 4 nm

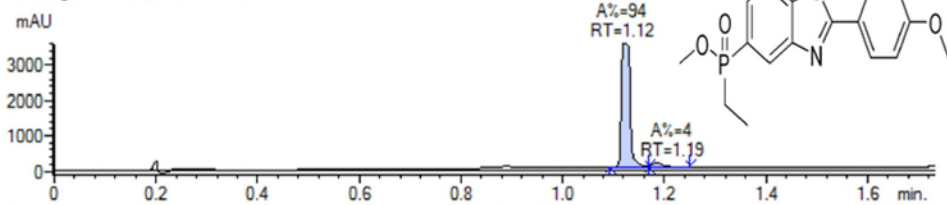

## MS Spectrum

Group#1 - PDA Peak: 6, RT: 1.09 to 1.17 min

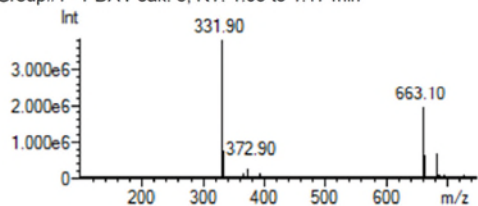

## MS Spectrum

Group#2 - PDA Peak: 6, RT: 1.09 to 1.17 min

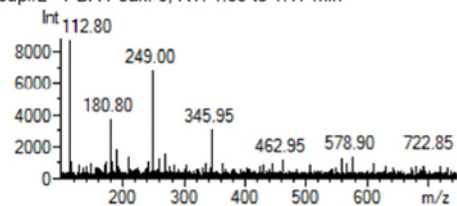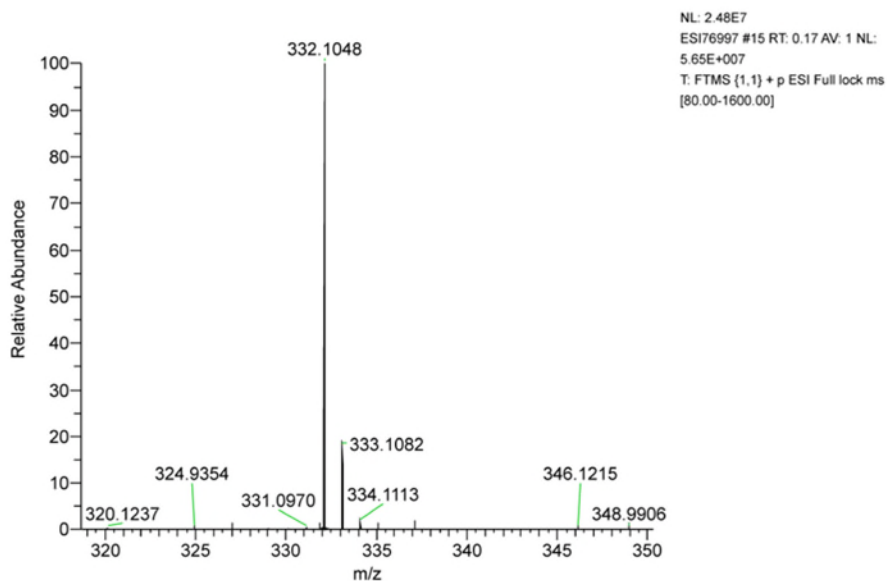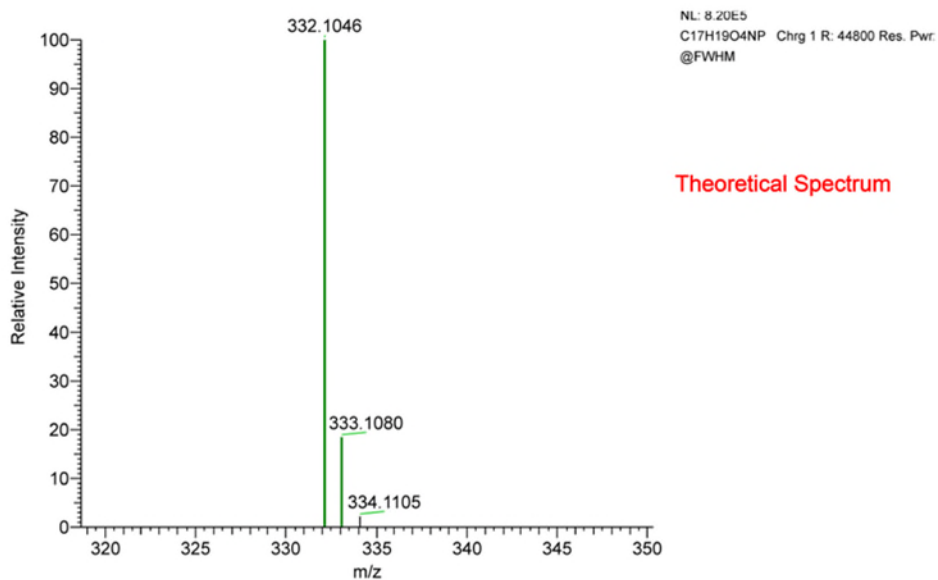

| Peak Mass Display... | Combin...                           | RDB       | Delta [p... | Theo. m... | Rank      | Combin... | # Match... | # Misse... | MS Cov... | Pattern... | MSMS...   |          |
|----------------------|-------------------------------------|-----------|-------------|------------|-----------|-----------|------------|------------|-----------|------------|-----------|----------|
| 332.1048             | C <sub>17</sub> H <sub>19</sub> ... | 28.787... | 9.50        | 0.62       | 332.10... | 1         | 95.042...  | 4          | 0         | 98.723...  | 97.907... | (Collec. |



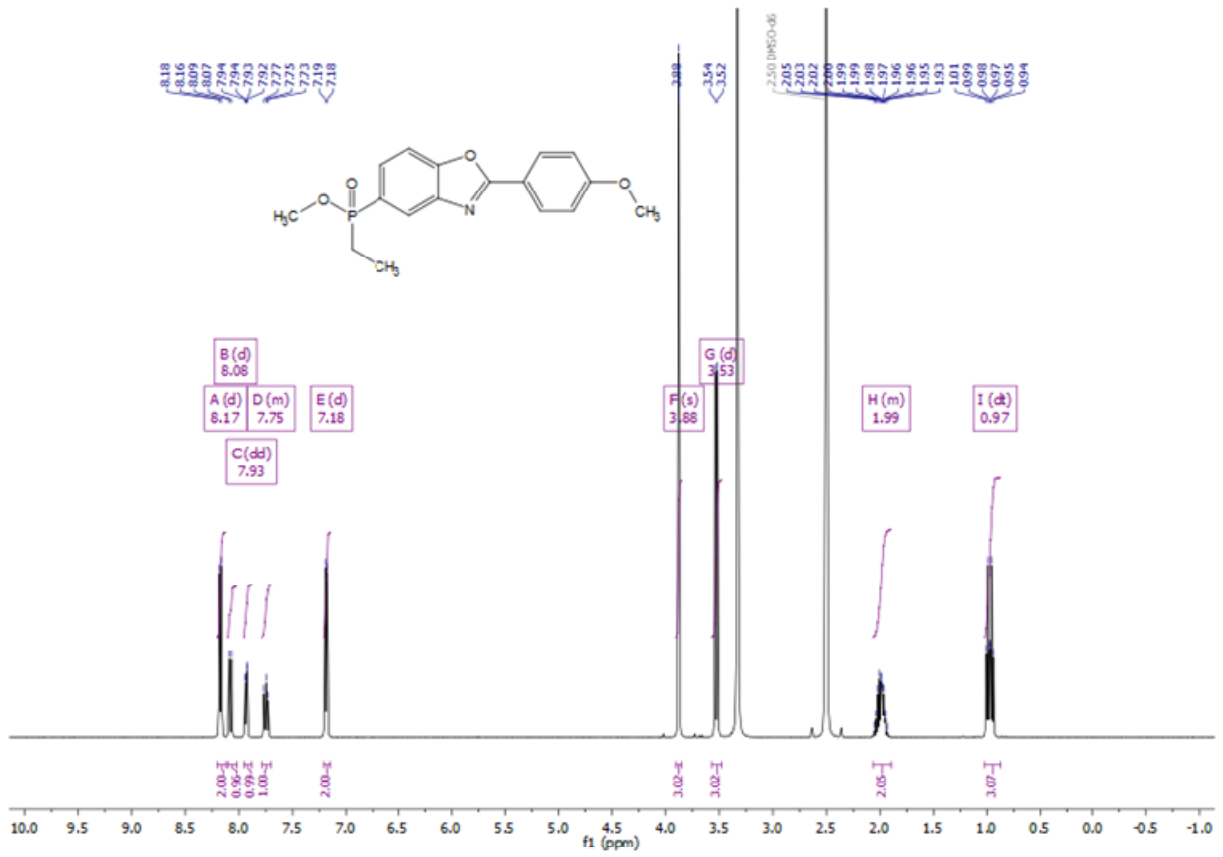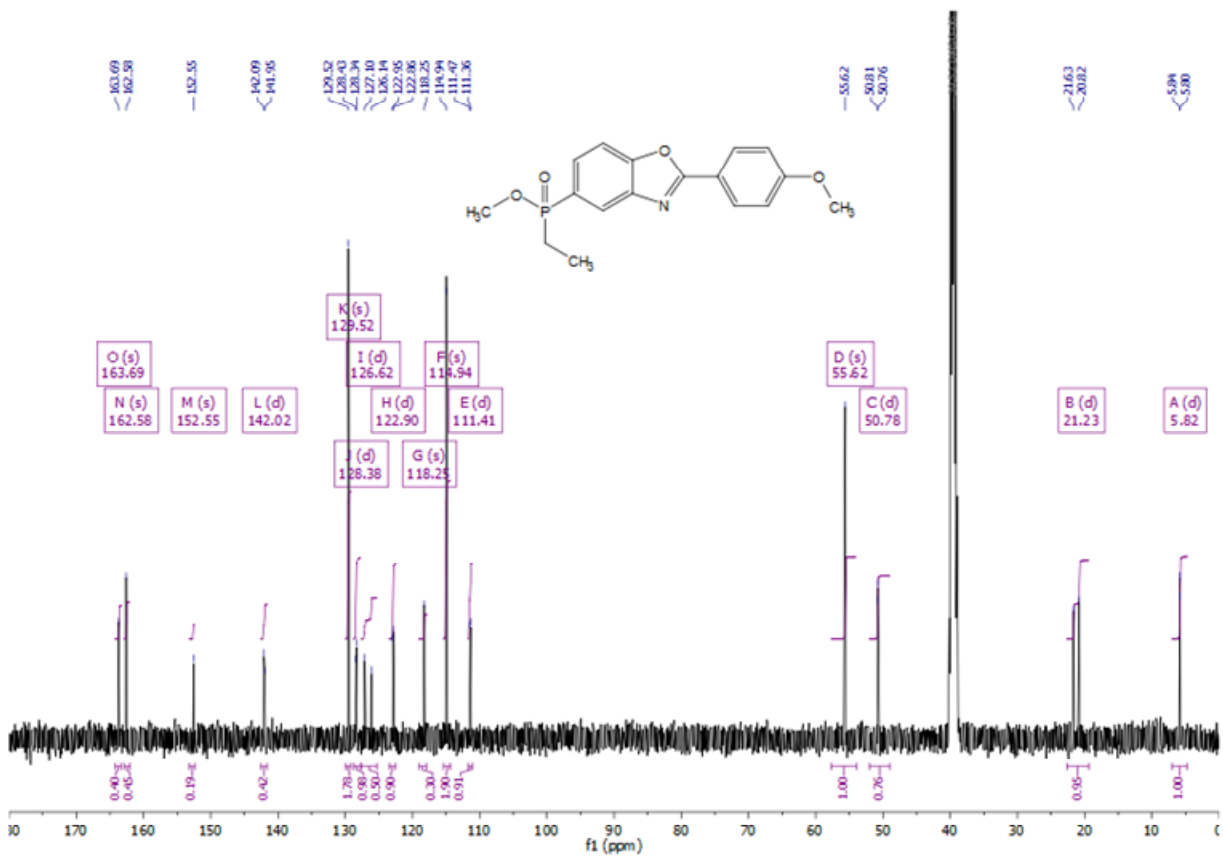

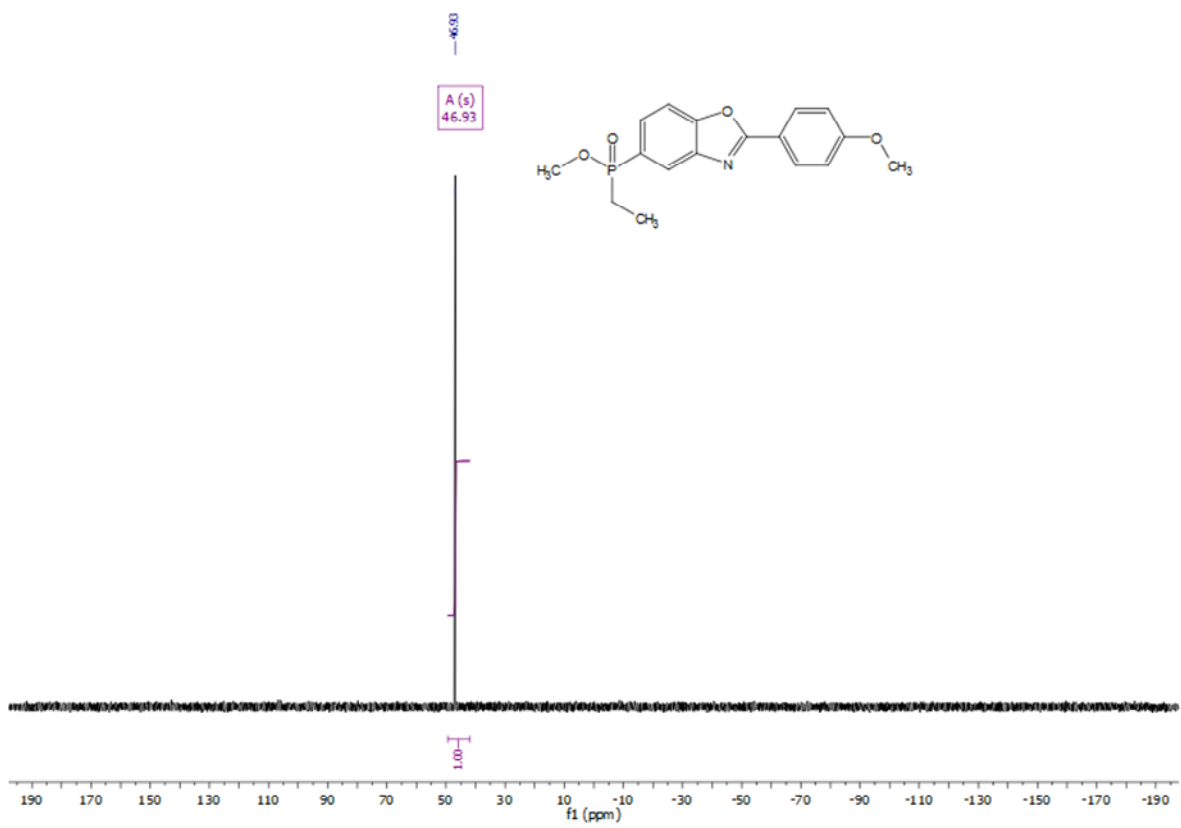

# methyl (2-(3-(difluoromethoxy)phenyl)benzo[d]oxazol-5-yl)(ethyl)phosphinate (48)

## PDA Chromatogram

1: Wavelength 215 nm, Band Width 4 nm

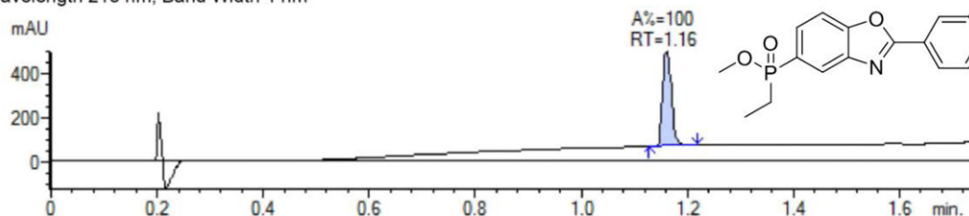

## MS Spectrum

Group#1 - PDA Peak: 8, RT: 1.13 to 1.22 min

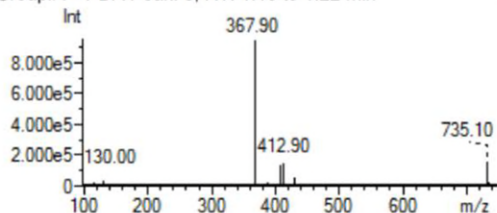

## MS Spectrum

Group#2 - PDA Peak: 8, RT: 1.13 to 1.22 min

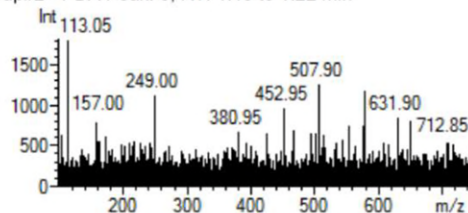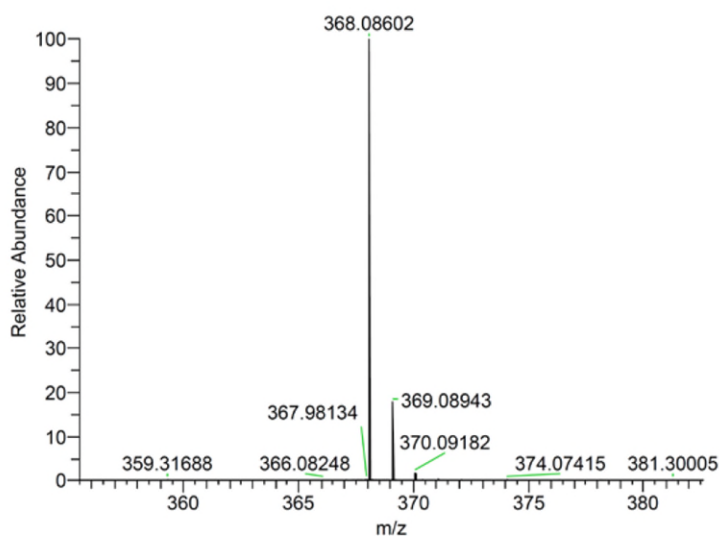

NL: 3.63E7  
ESI74315 #13-27 RT: 0.15-0.31 AV: 8 NL:  
3.63E+007  
T: FTMS (1,1) + p ESI Full ms  
[80.00-1600.00]

Measured  
Spectrum

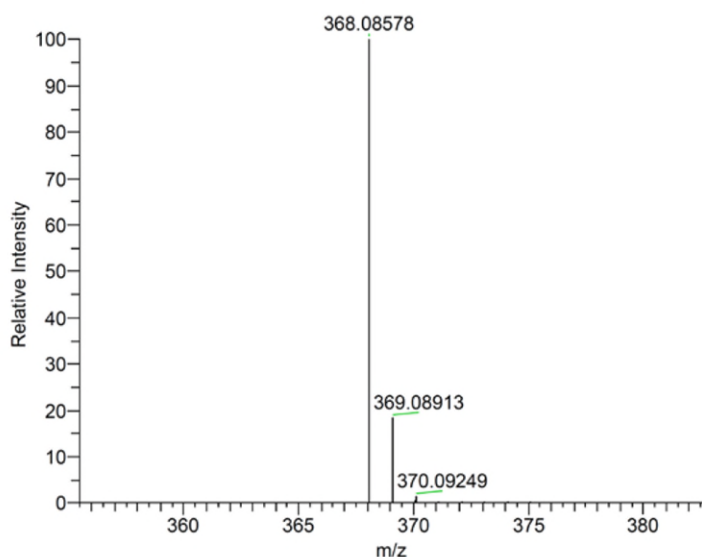

NL: 8.20E5  
C17H17O4N1F2P1: C<sub>17</sub> H<sub>17</sub> O<sub>4</sub> N F<sub>2</sub> P  
Chrg 1 R: 1000000 Res. Pwr. @FWHM

Theoretical  
Spectrum

| $m/z$     | Formula                                                          | RDB | Delta ppm | Theo. Mass |
|-----------|------------------------------------------------------------------|-----|-----------|------------|
| 368.08603 | C <sub>17</sub> H <sub>17</sub> O <sub>4</sub> NF <sub>2</sub> P | 9.5 | 0.68      | 368.08578  |

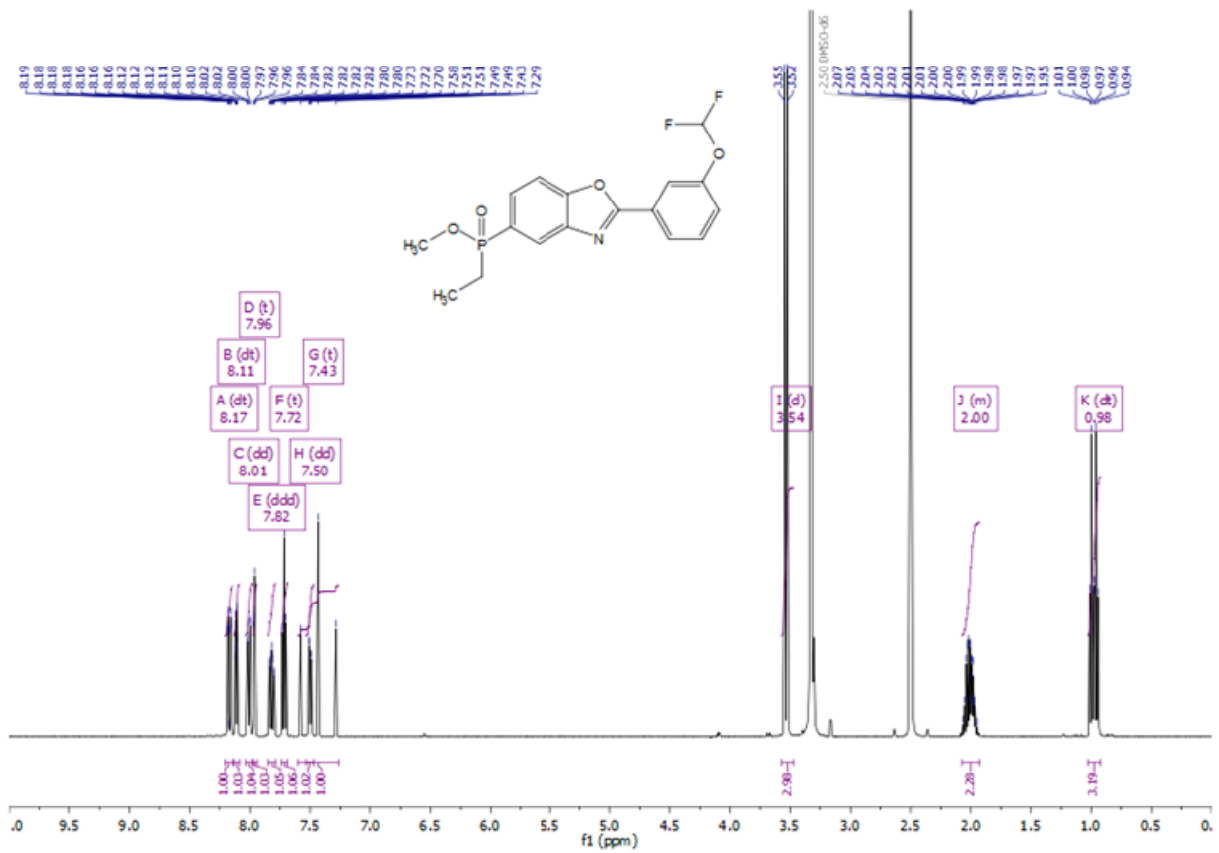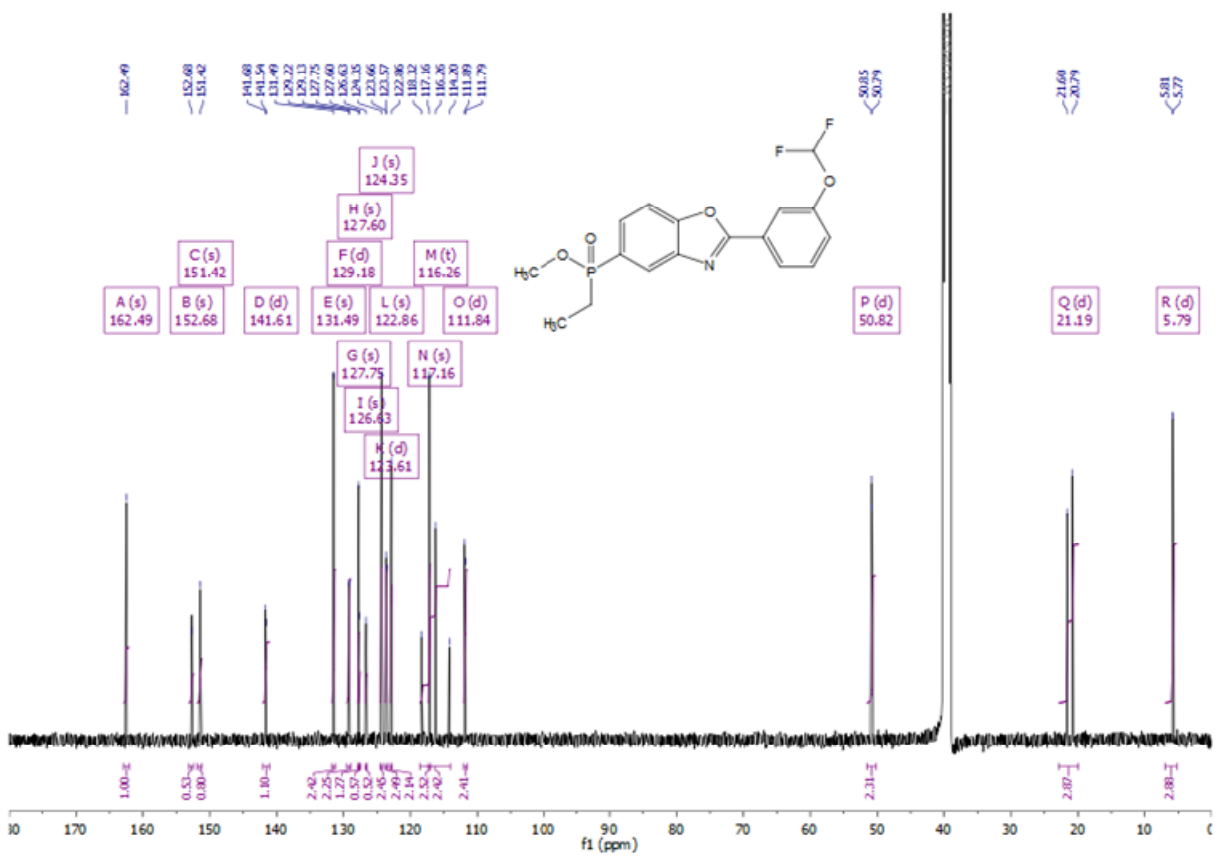

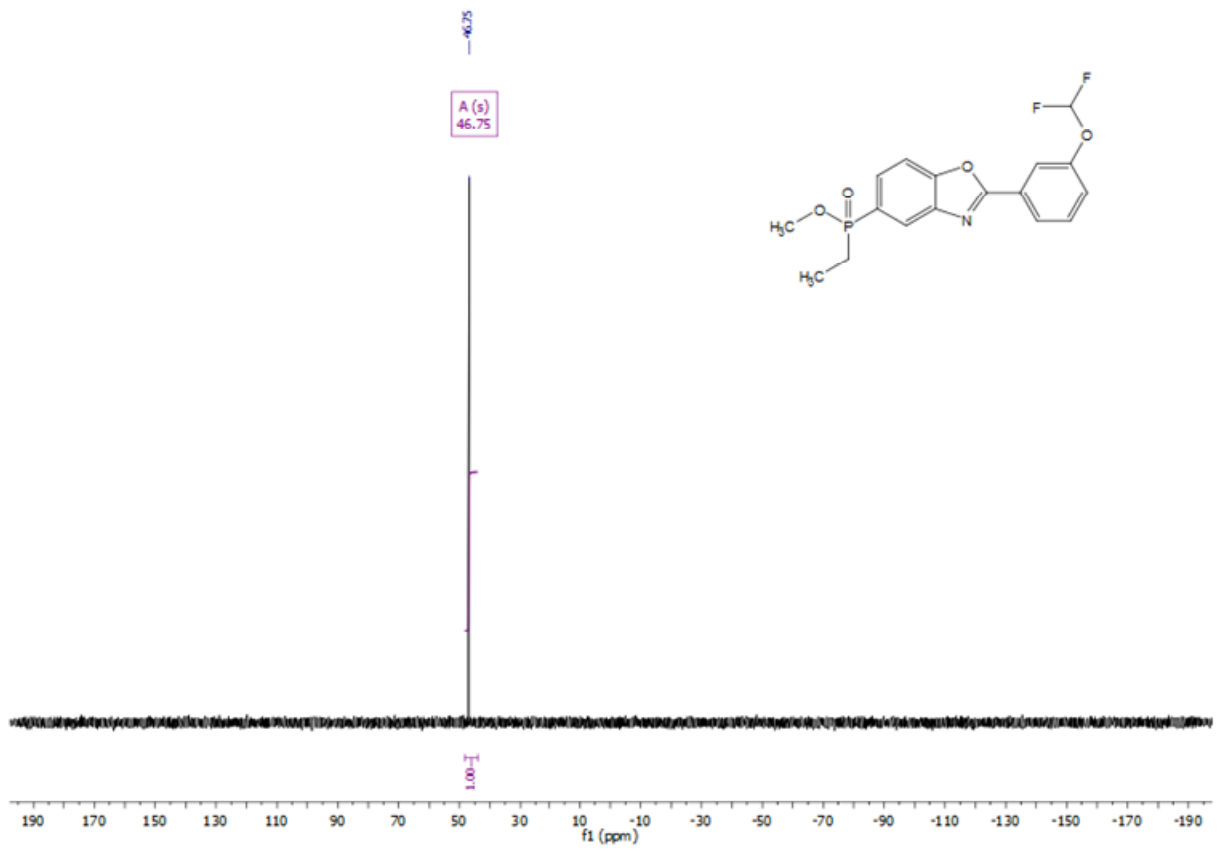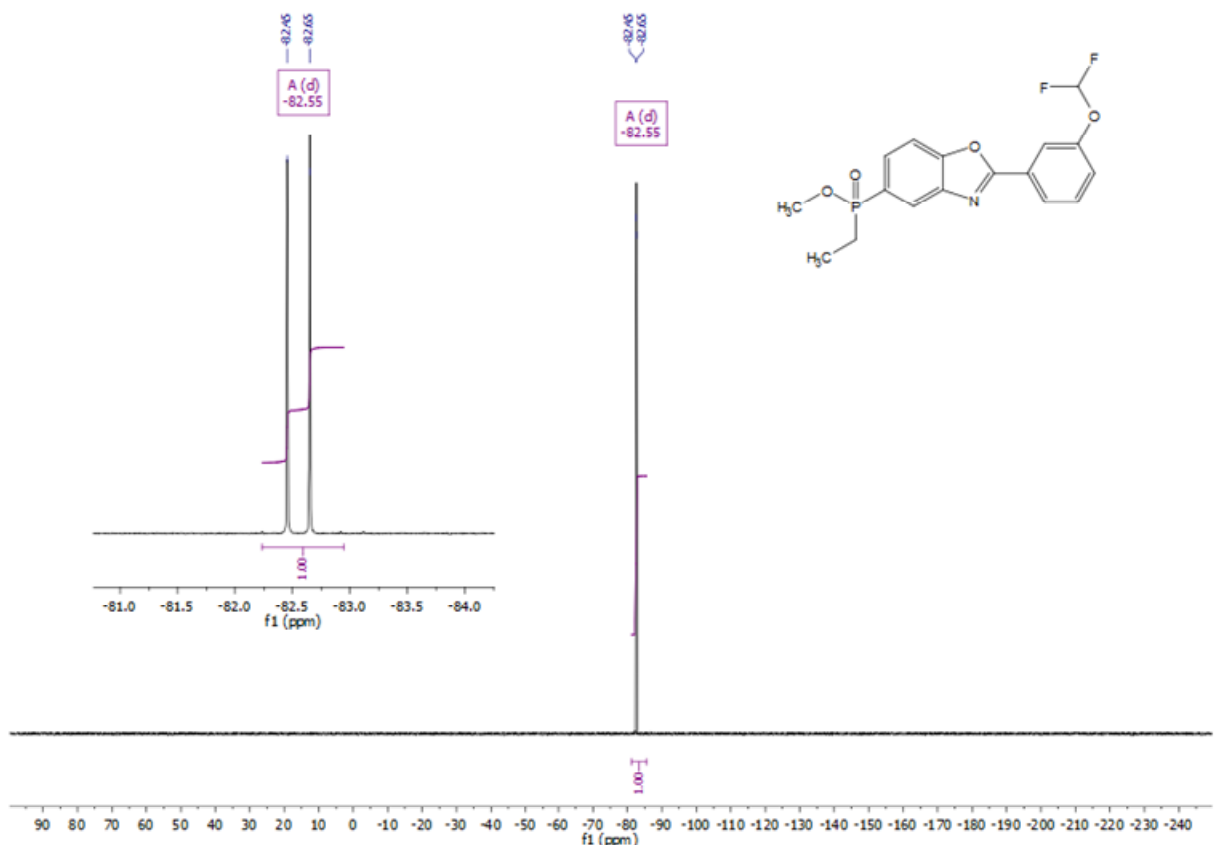

methyl ethyl(2-(2-(trifluoromethyl)pyridin-4-yl)benzo[d]oxazol-5-yl)phosphinate (49)

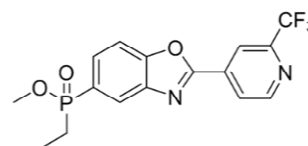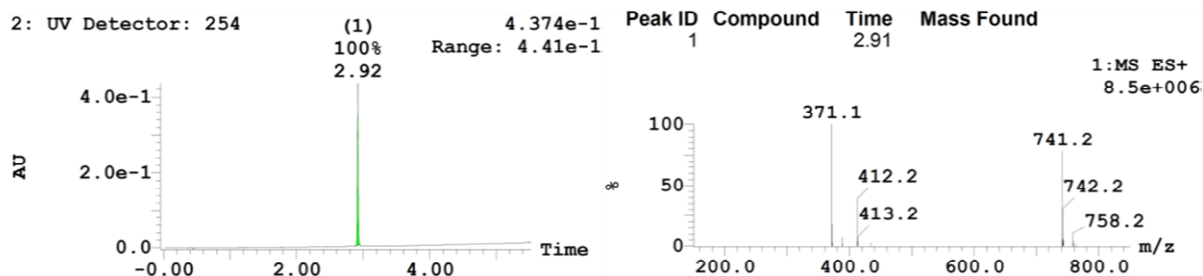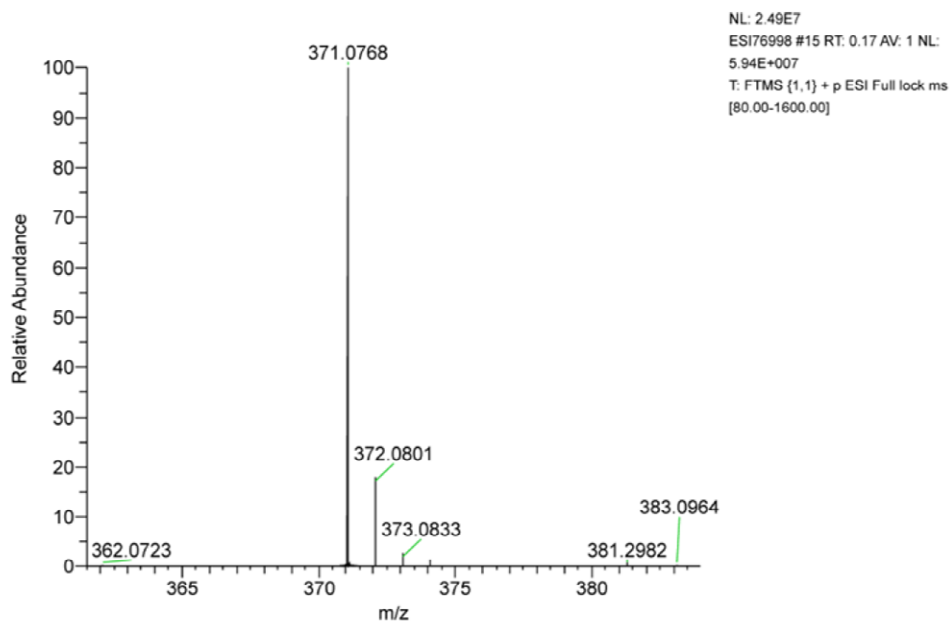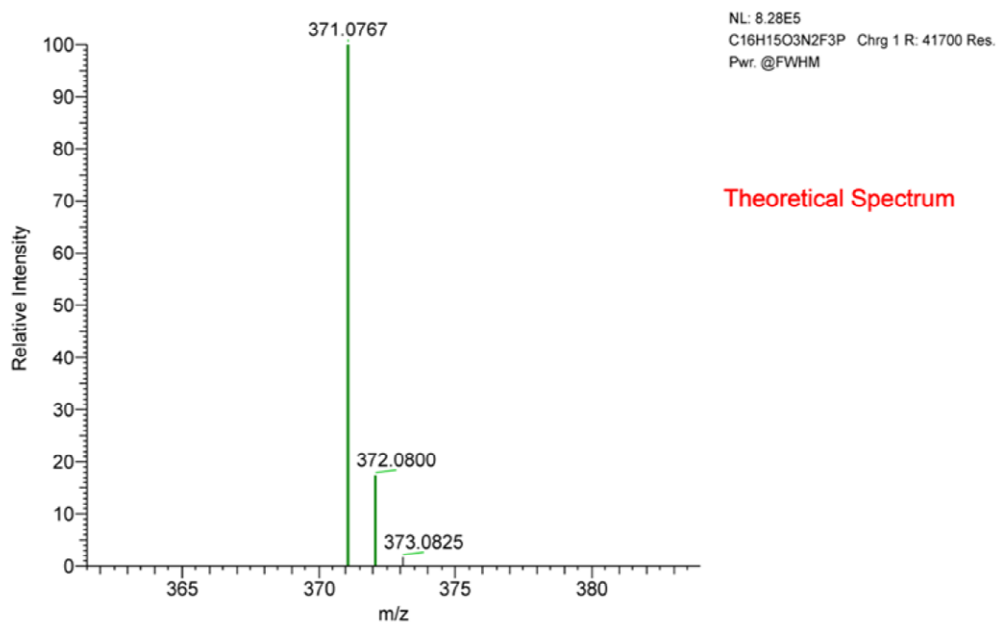

| Peak Mass Display... | Combin...                           | RDB       | Delta [p... | Theo. m... | Rank      | Combin... | # Match... | # Misse... | MS Cov... | Pattern... | MSMS...           |
|----------------------|-------------------------------------|-----------|-------------|------------|-----------|-----------|------------|------------|-----------|------------|-------------------|
| 371.0768             | C <sub>16</sub> H <sub>15</sub> ... | 28.353... | 9.50        | 0.25       | 371.07... | 1         | 95.032...  | 3          | 1         | 98.736...  | 98.176... (Collec |

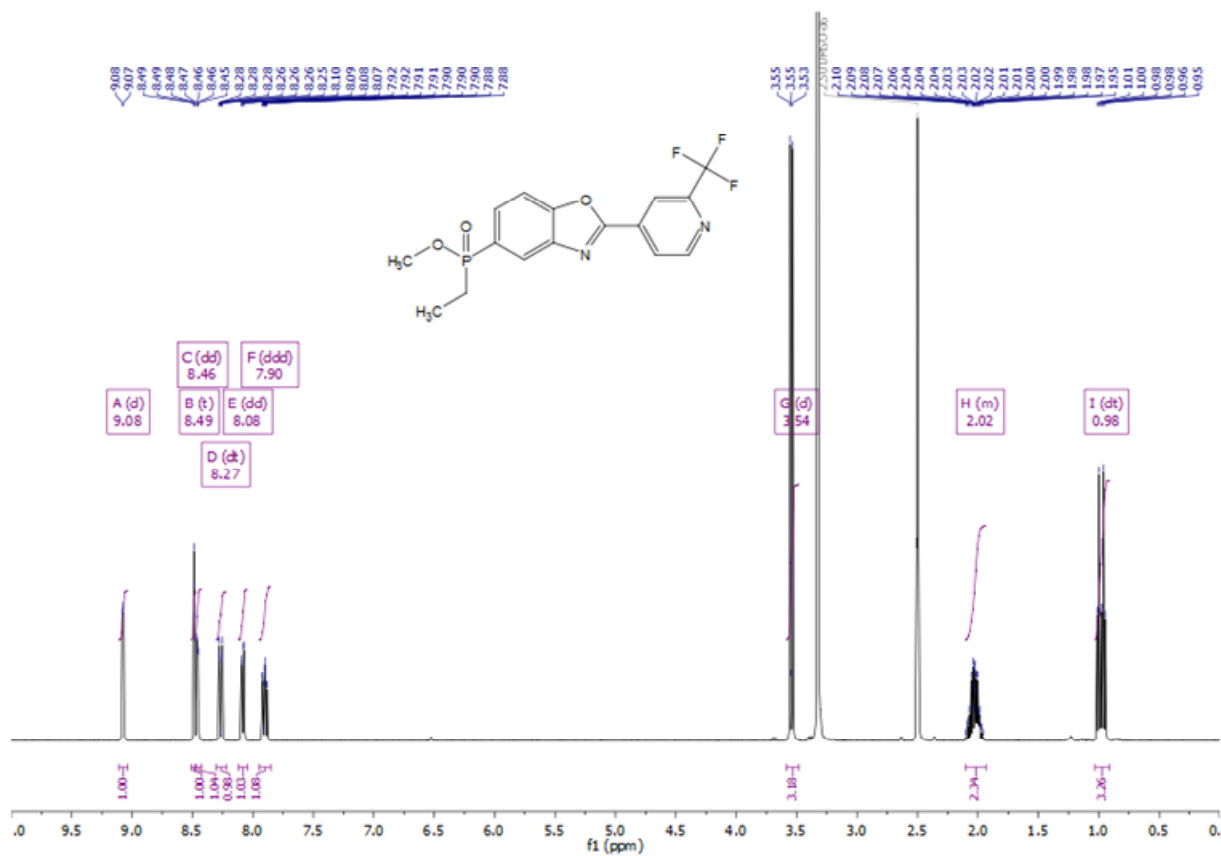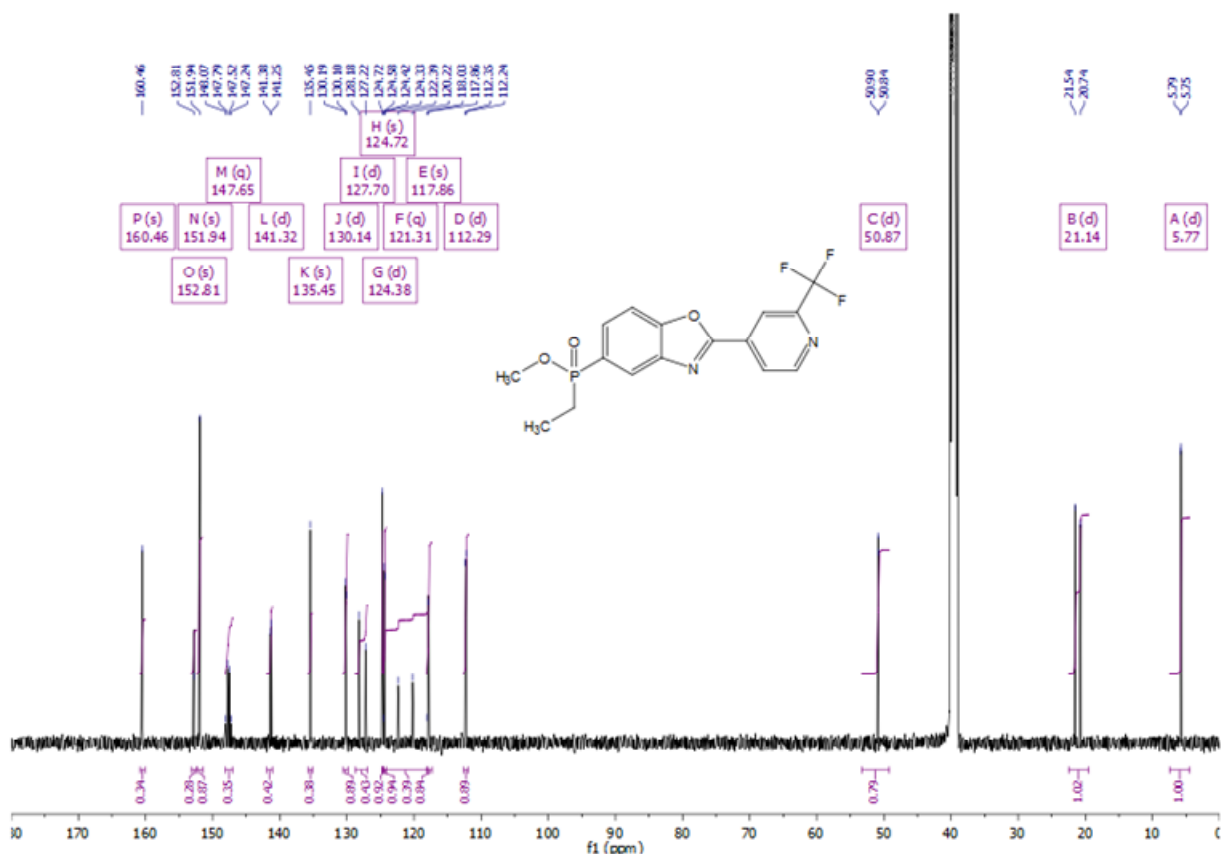

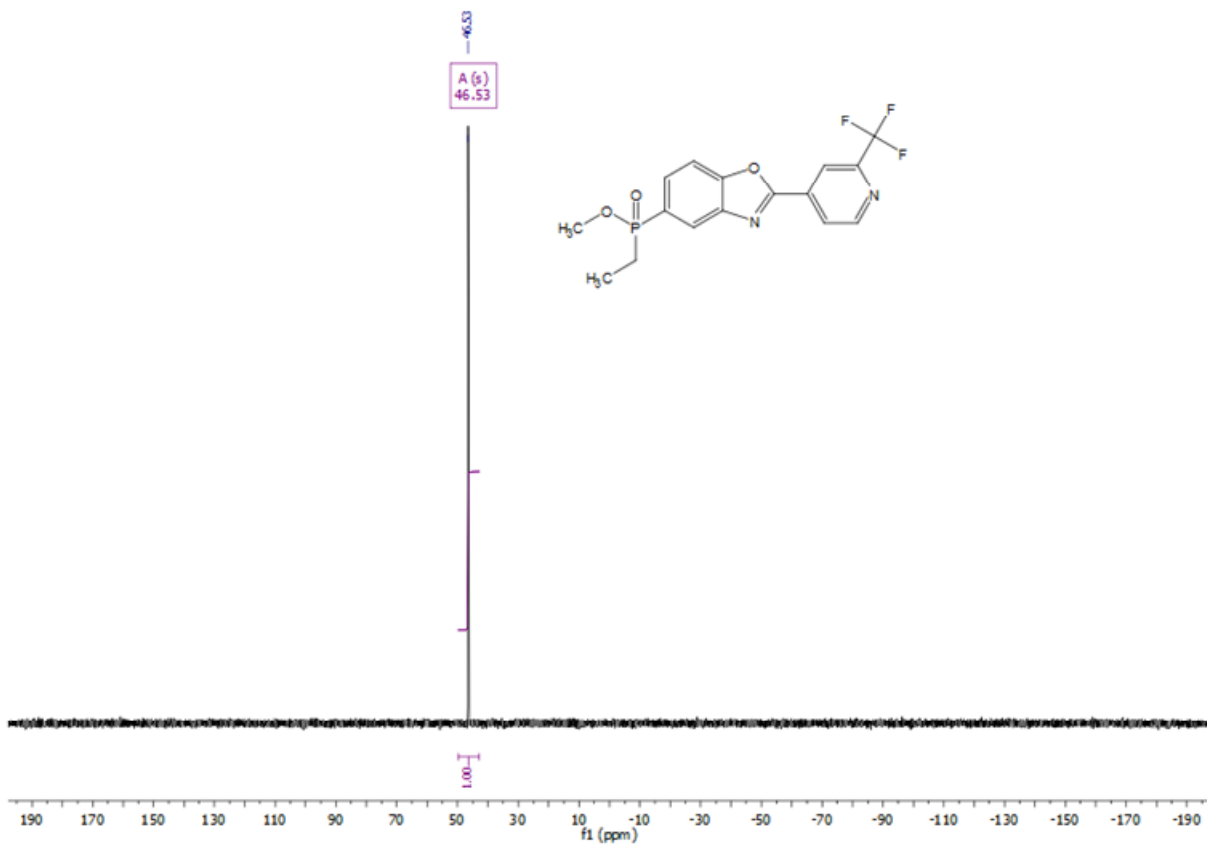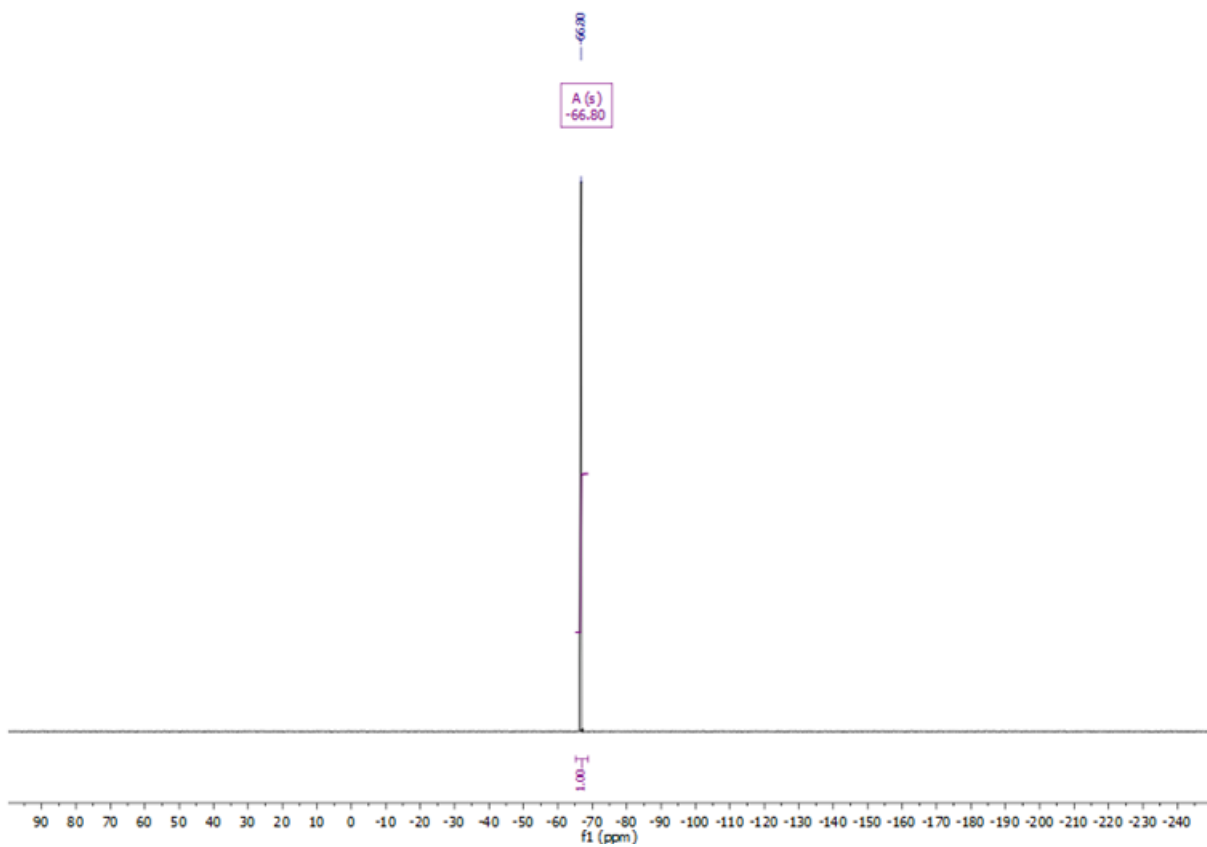



# methyl ethyl(2-(2-(trifluoromethyl)pyridin-3-yl)benzo[d]oxazol-5-yl)phosphinate (50)

## PDA Chromatogram

1: Wavelength 215 nm, Band Width 4 nm

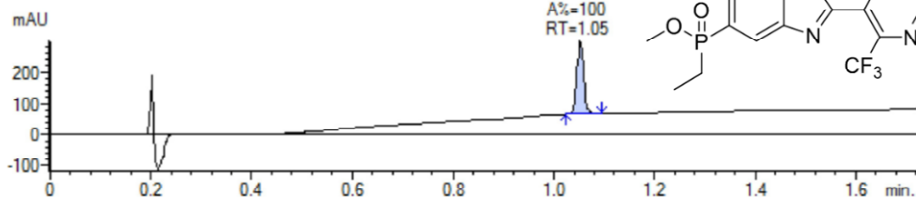

## MS Spectrum

Group#1 - PDA Peak: 5, RT: 1.03 to 1.10 min

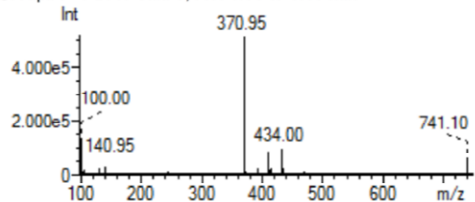

## MS Spectrum

Group#2 - PDA Peak: 5, RT: 1.03 to 1.10 min

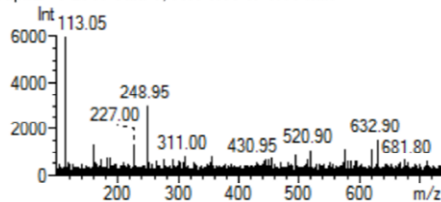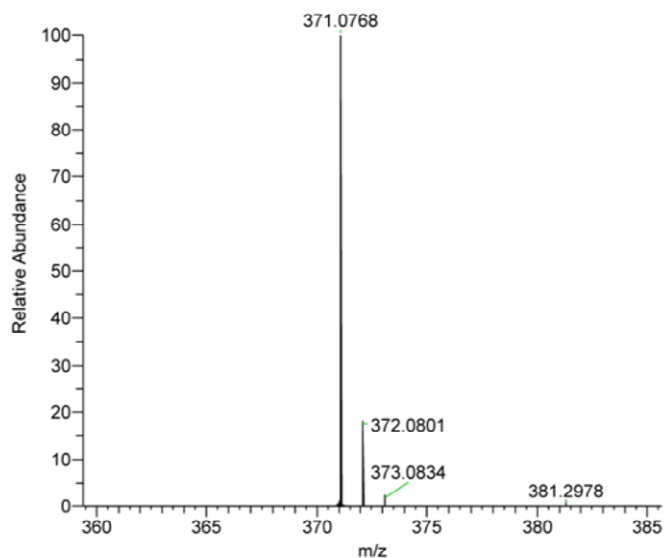

NL: 1.76E7  
ESI77002 #15 RT: 0.17 AV: 1 NL:  
6.31E+007  
T: FTMS (1,1) + p ESI Full lock ms  
[80.00-1600.00]

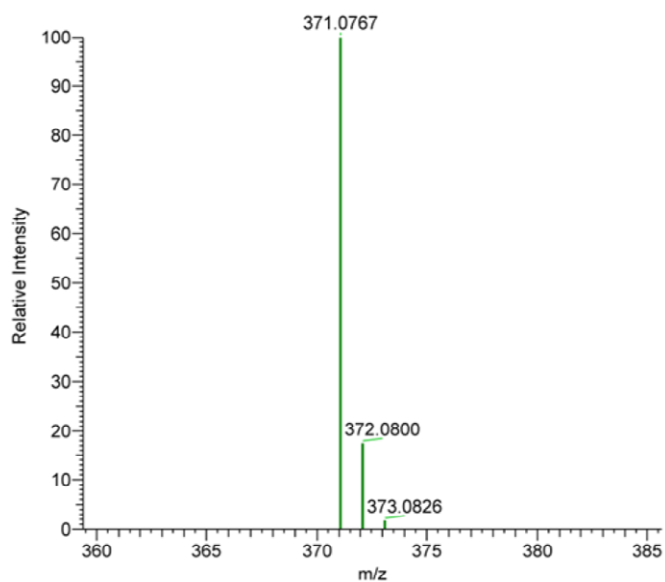

NL: 8.28E5  
C16H15O3N2F3P Chrg 1 R: 42300 Res.  
Pwr. @FWHM

Theoretical Spectrum

| Peak Mass Display... | Combin... | RDB       | Delta [p... | Theo. m... | Rank      | Combin... | # Match... | # Misse... | MS Cov... | Pattern... | MSMS...   |            |
|----------------------|-----------|-----------|-------------|------------|-----------|-----------|------------|------------|-----------|------------|-----------|------------|
| 371.0768             | C16H15... | 29.061... | 9.50        | 0.25       | 371.07... | 1         | 95.362...  | 3          | 1         | 99.045...  | 98.179... | (Collec... |



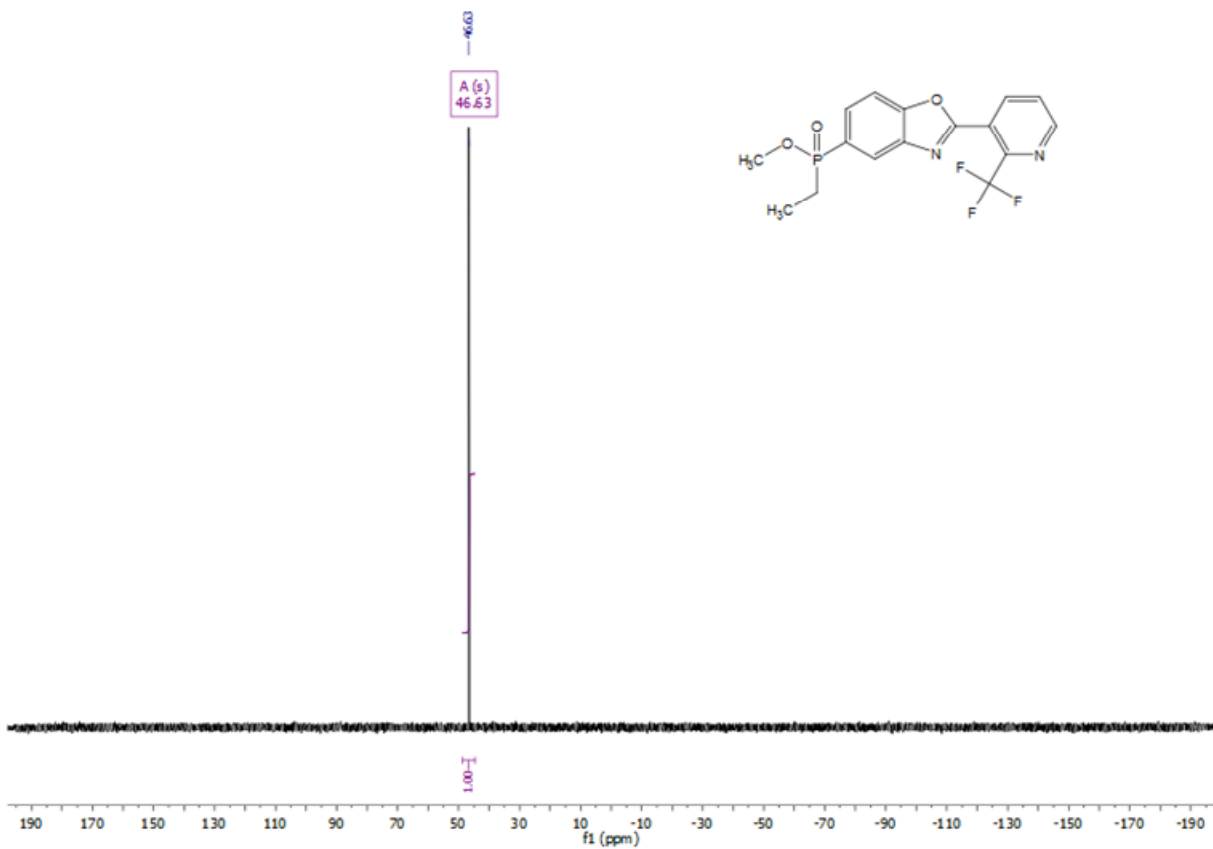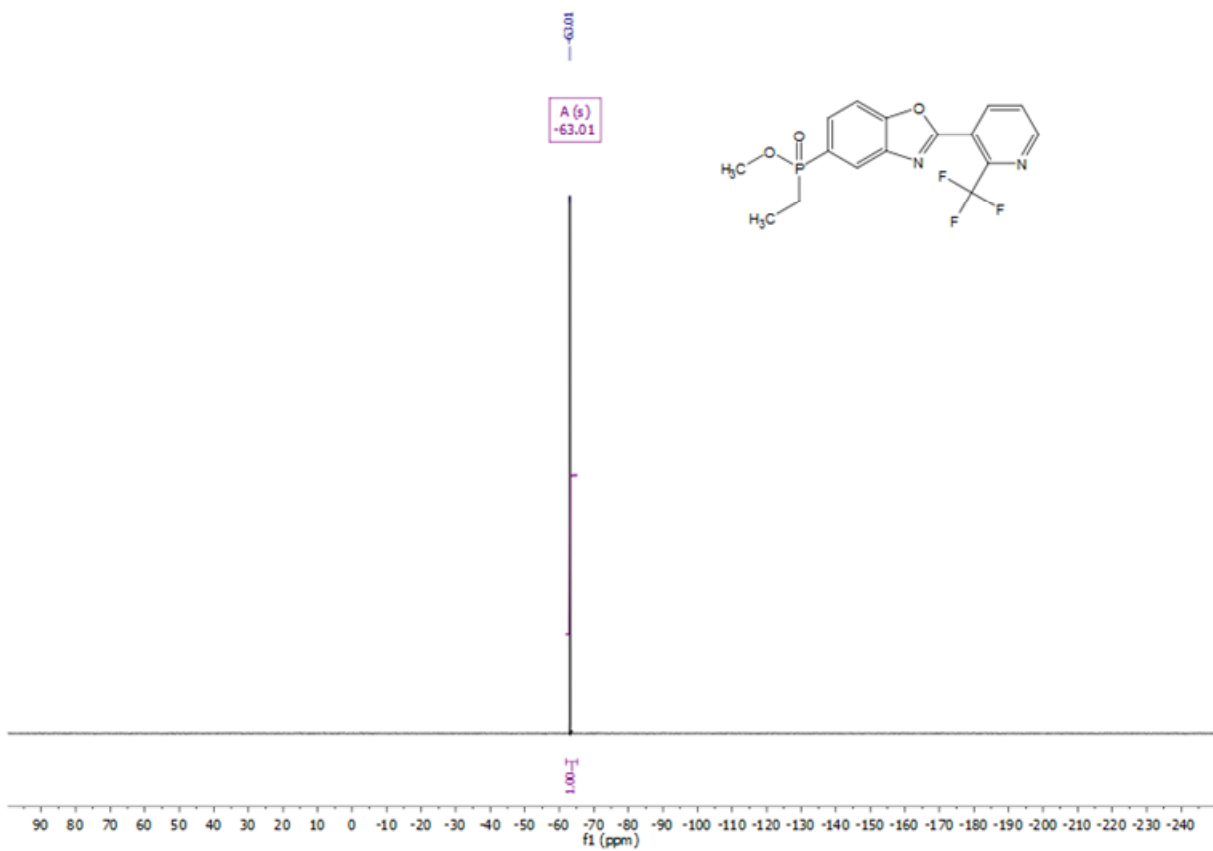

methyl (2-(2-(difluoromethyl)phenyl)benzo[d]oxazol-6-yl)(ethyl)phosphinate (51)

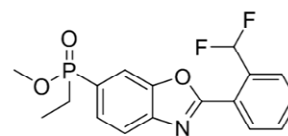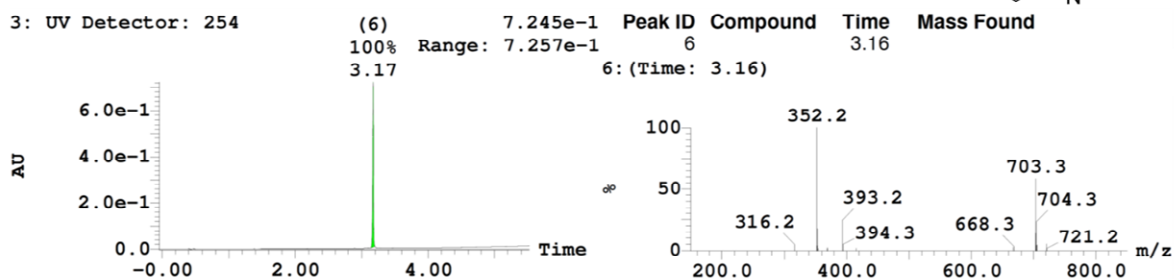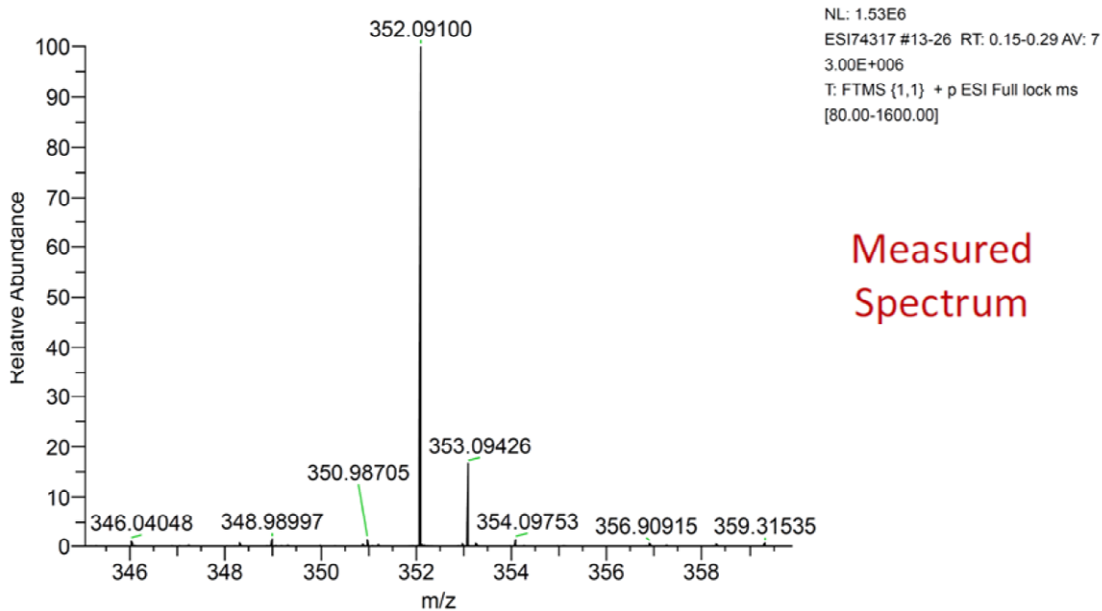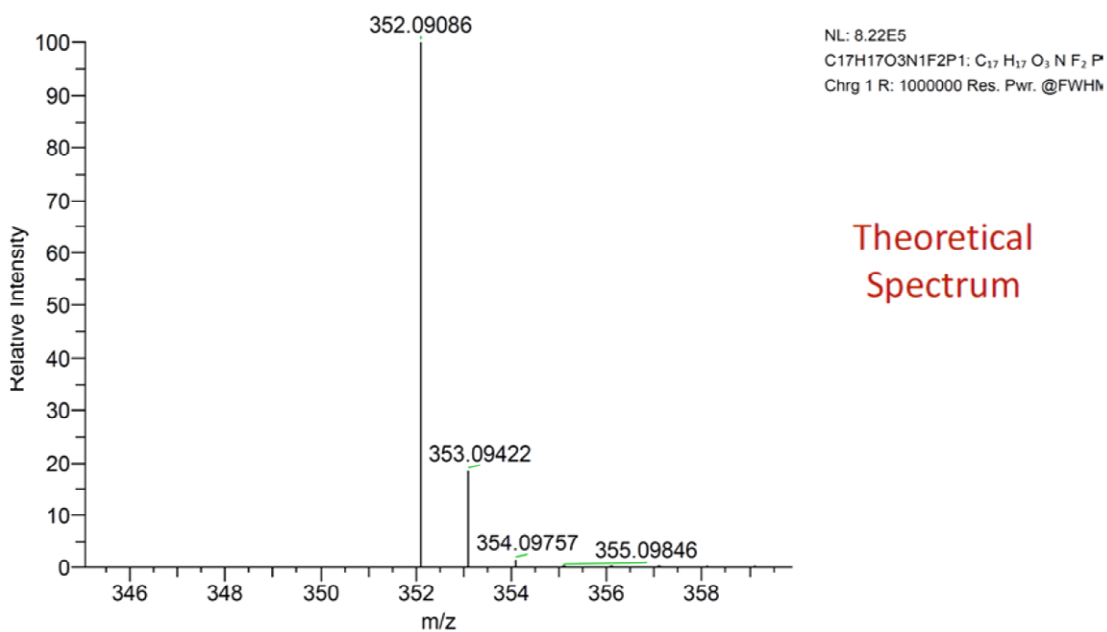

| n/z       | Formula                                                          | RDB | Delta ppm | Theo. Mass |
|-----------|------------------------------------------------------------------|-----|-----------|------------|
| 352.09100 | C <sub>17</sub> H <sub>17</sub> O <sub>3</sub> NF <sub>2</sub> P | 9.5 | 0.4       | 352.09086  |

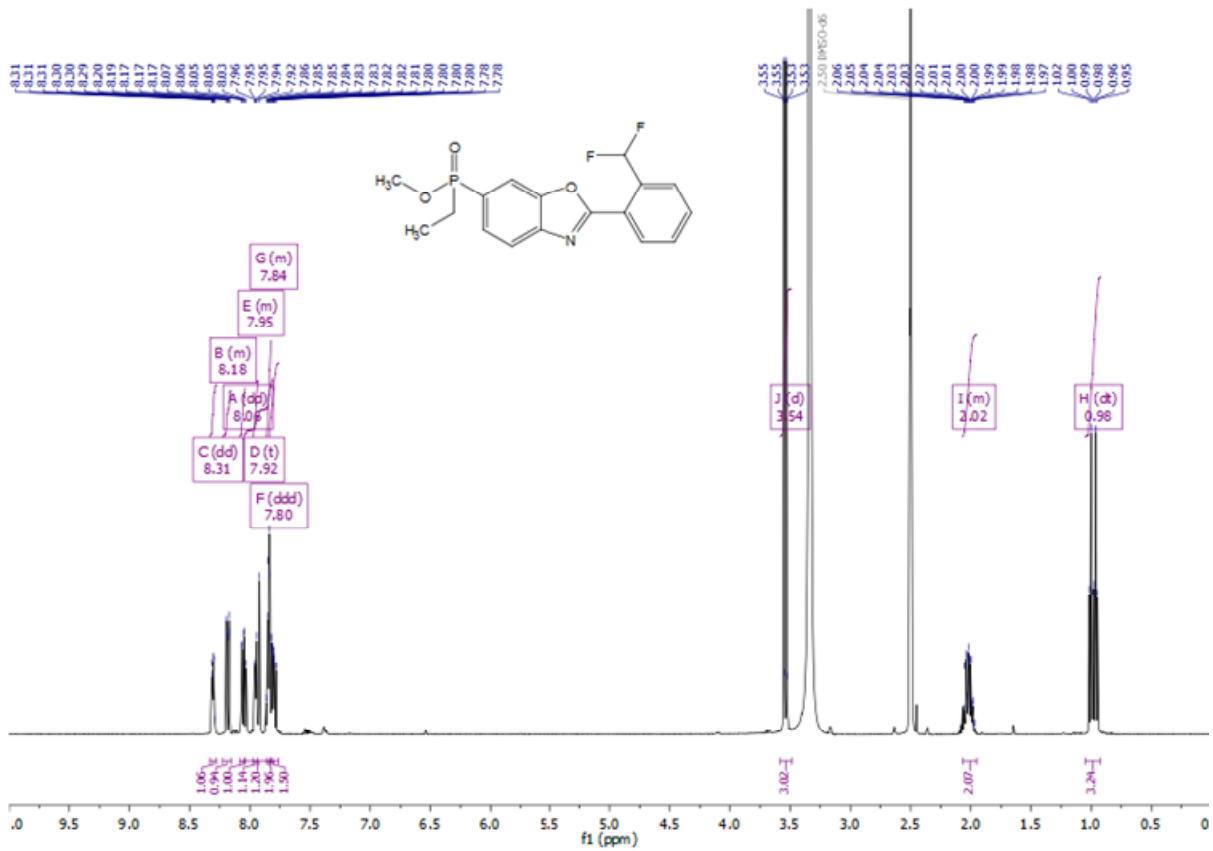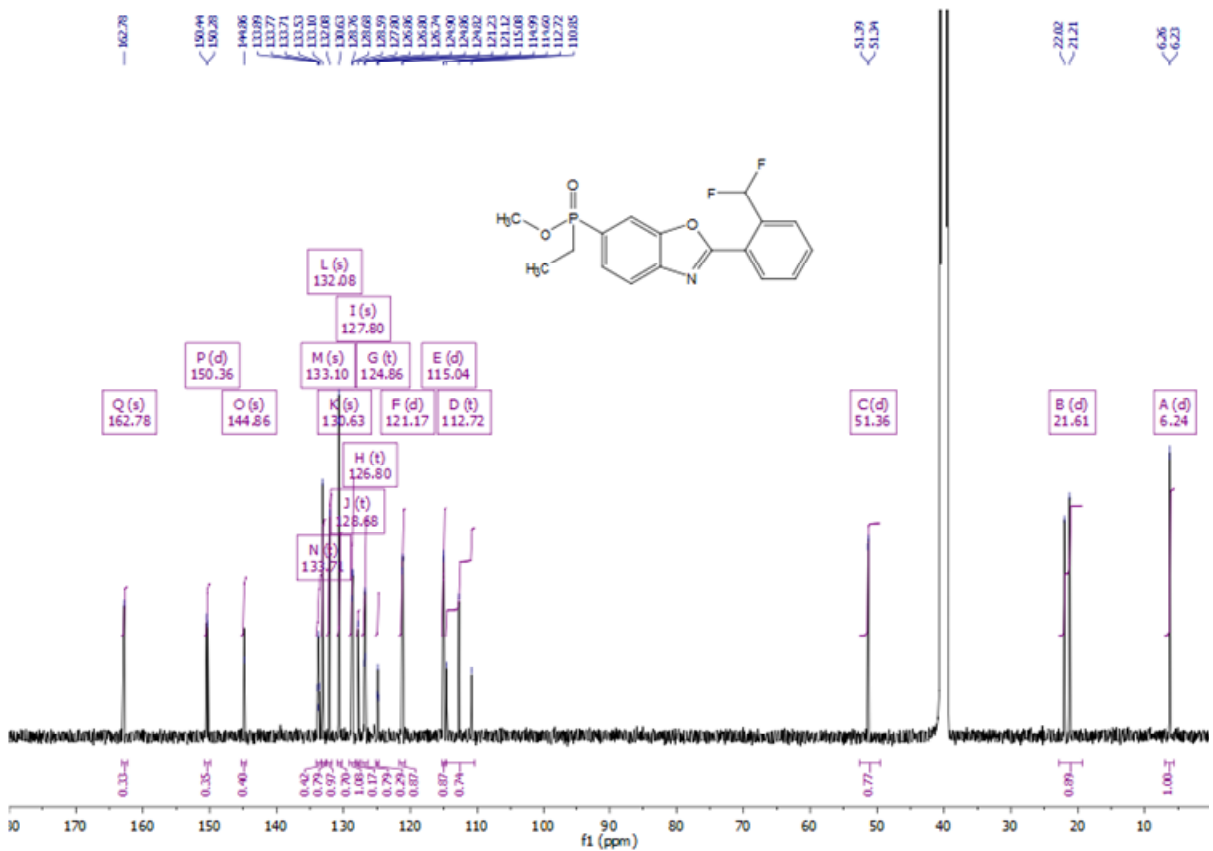

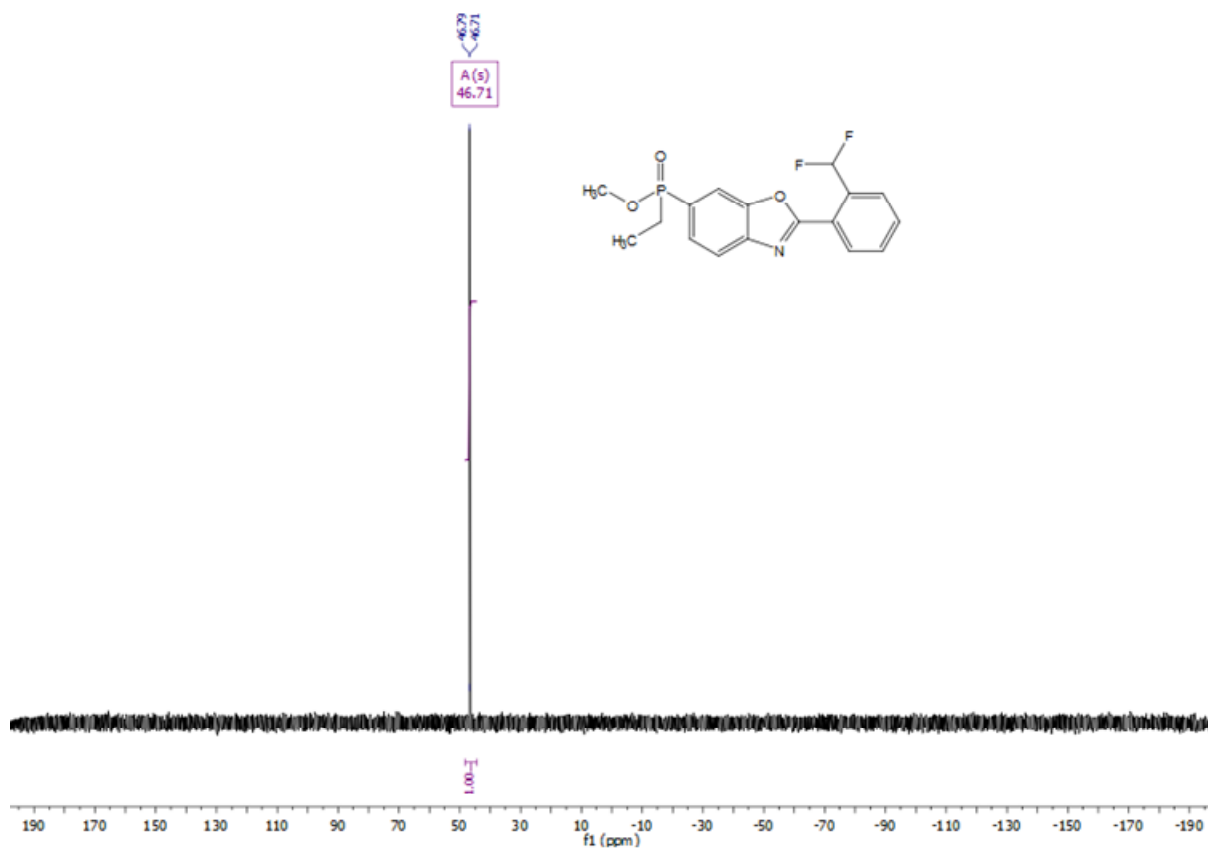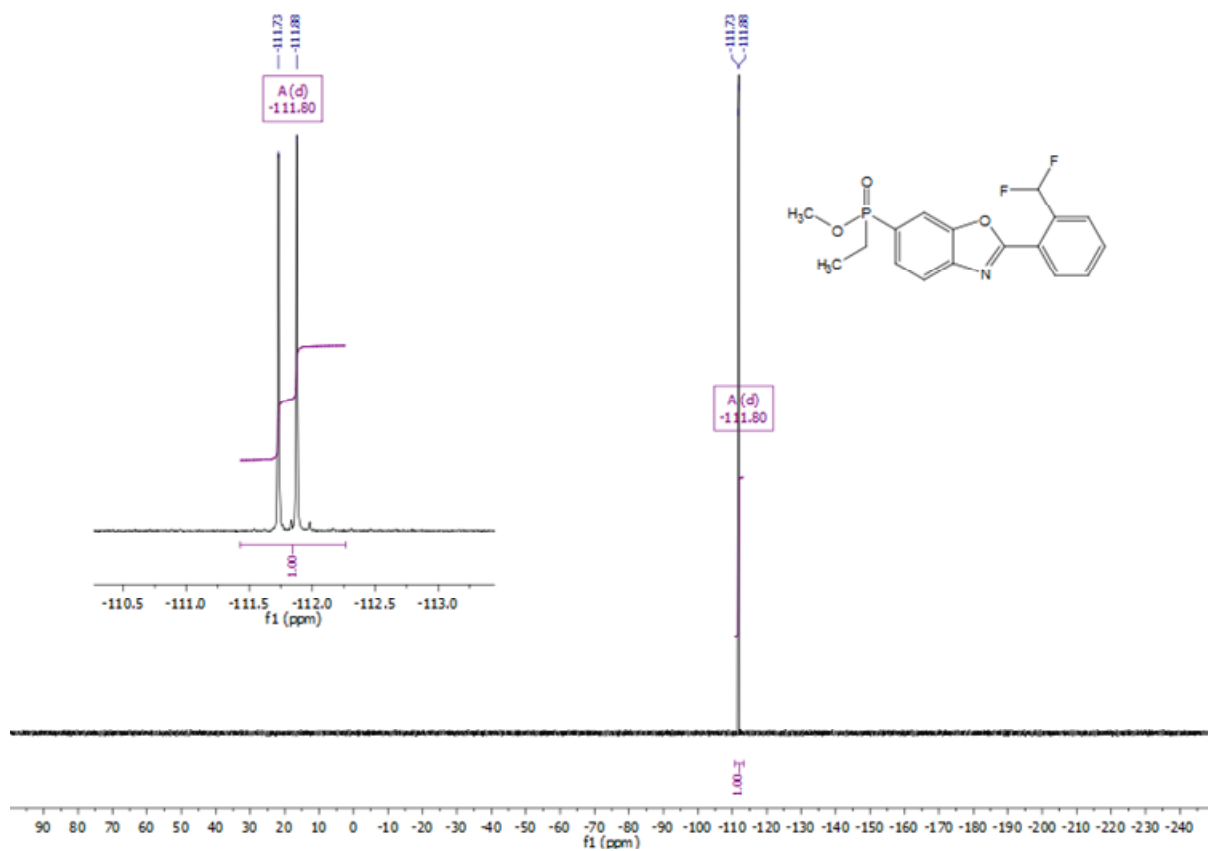

methyl (2-(4-(difluoromethyl)phenyl)benzo[d]oxazol-6-yl)(ethyl)phosphinate (52)

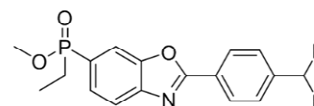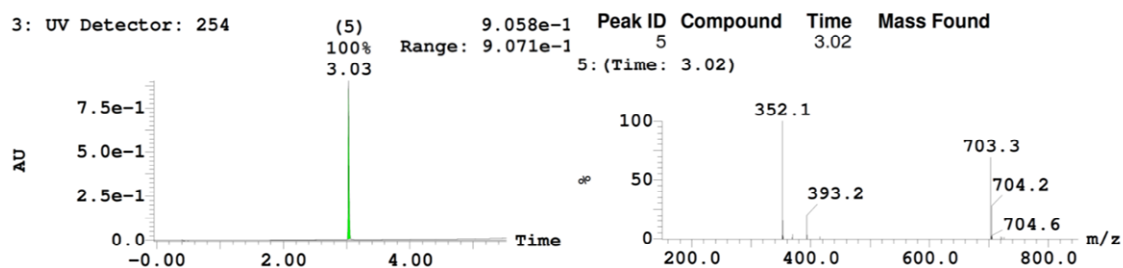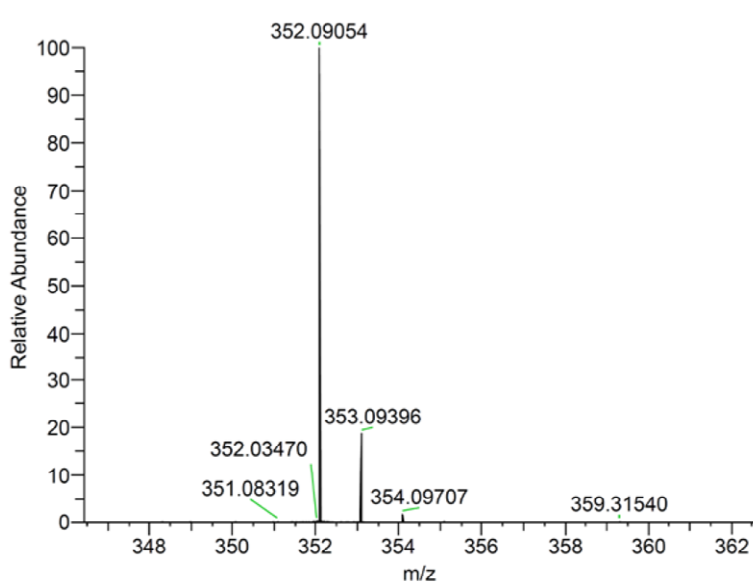

Measured  
Spectrum

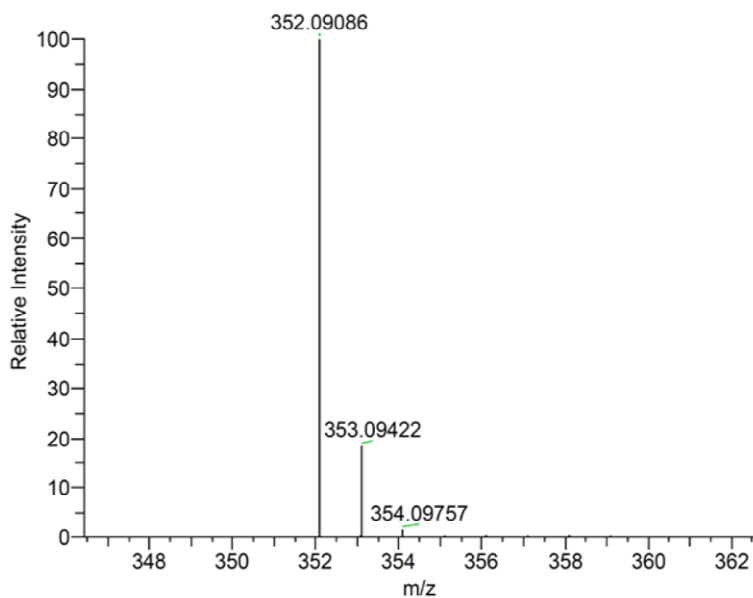

Theoretical  
Spectrum

| m/z       | Formula                                                          | RDB | Delta ppm | Theo. Mass |
|-----------|------------------------------------------------------------------|-----|-----------|------------|
| 352.09055 | C <sub>17</sub> H <sub>17</sub> O <sub>3</sub> NF <sub>2</sub> P | 9.5 | -0.9      | 352.09086  |





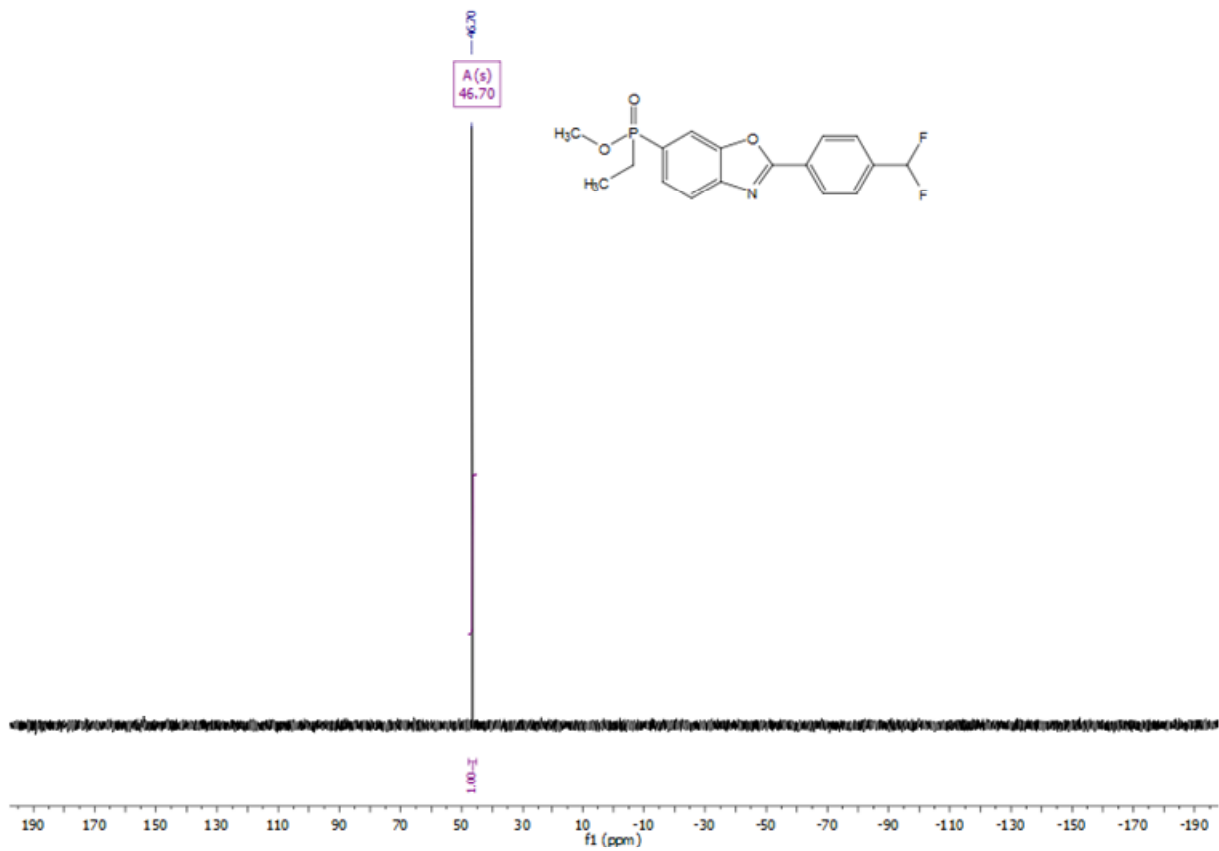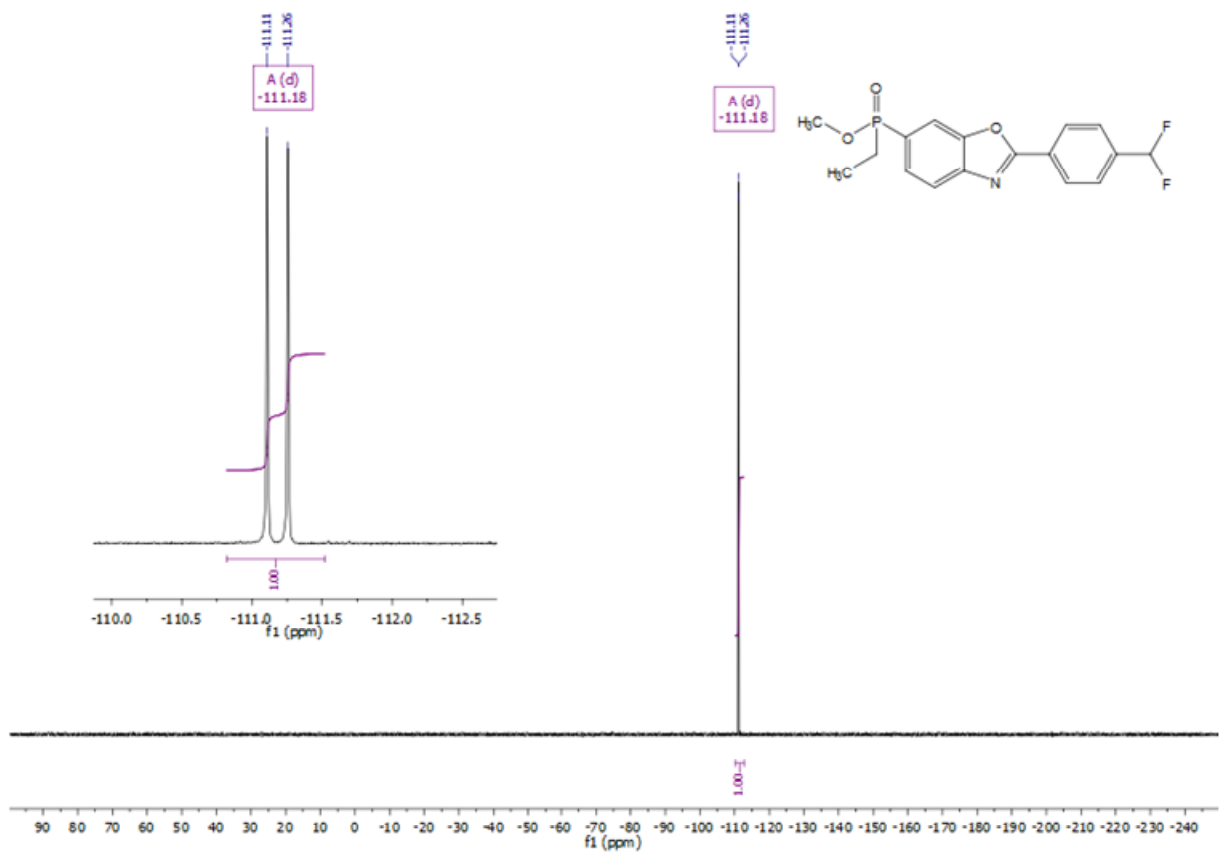

# methyl (2-(3-(difluoromethoxy)phenyl)benzo[d]oxazol-6-yl)(ethyl)phosphinate (53)

## PDA Chromatogram

1: Wavelength 215 nm, Band Width 4 nm

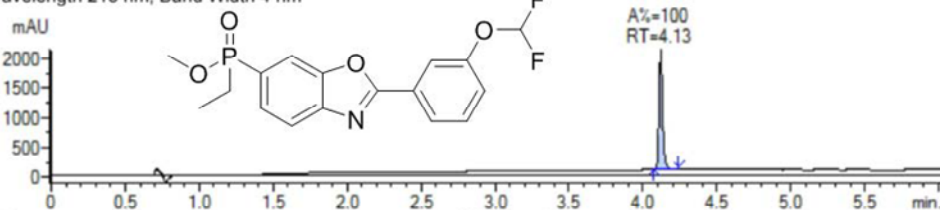

## MS Spectrum

Group#1 - PDA Peak: 15, RT: 4.08 to 4.25 min

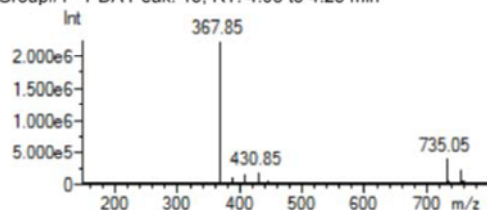

## MS Spectrum

Group#2 - PDA Peak: 15, RT: 4.08 to 4.25 min

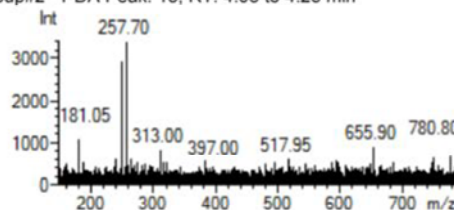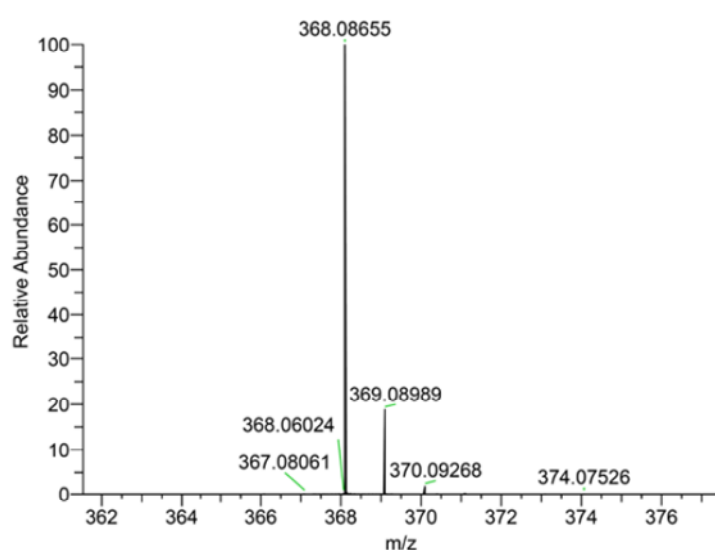

NL: 5.27E7  
ESI74335 #13-27 RT: 0.15-0.31 AV: 8 NL:  
5.27E+007  
T: FTMS (1,1) + p ESI Full ms  
[80.00-1600.00]

Measured  
Spectrum

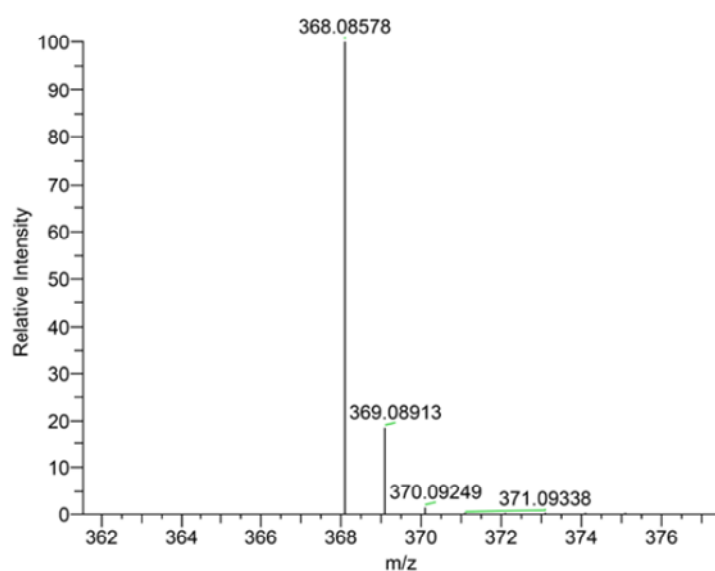

NL: 8.20E5  
C17H17O4N1F2P1: C<sub>17</sub>H<sub>17</sub>O<sub>4</sub>N F<sub>2</sub> P  
Chrg 1 R: 1000000 Res. Pwr. @FWHM

Theoretical  
Spectrum

| m/z       | Formula                                                          | RDB | Delta ppm | Theo. Mass |
|-----------|------------------------------------------------------------------|-----|-----------|------------|
| 368.08655 | C <sub>17</sub> H <sub>17</sub> O <sub>4</sub> NF <sub>2</sub> P | 9.5 | 2.09      | 368.08578  |



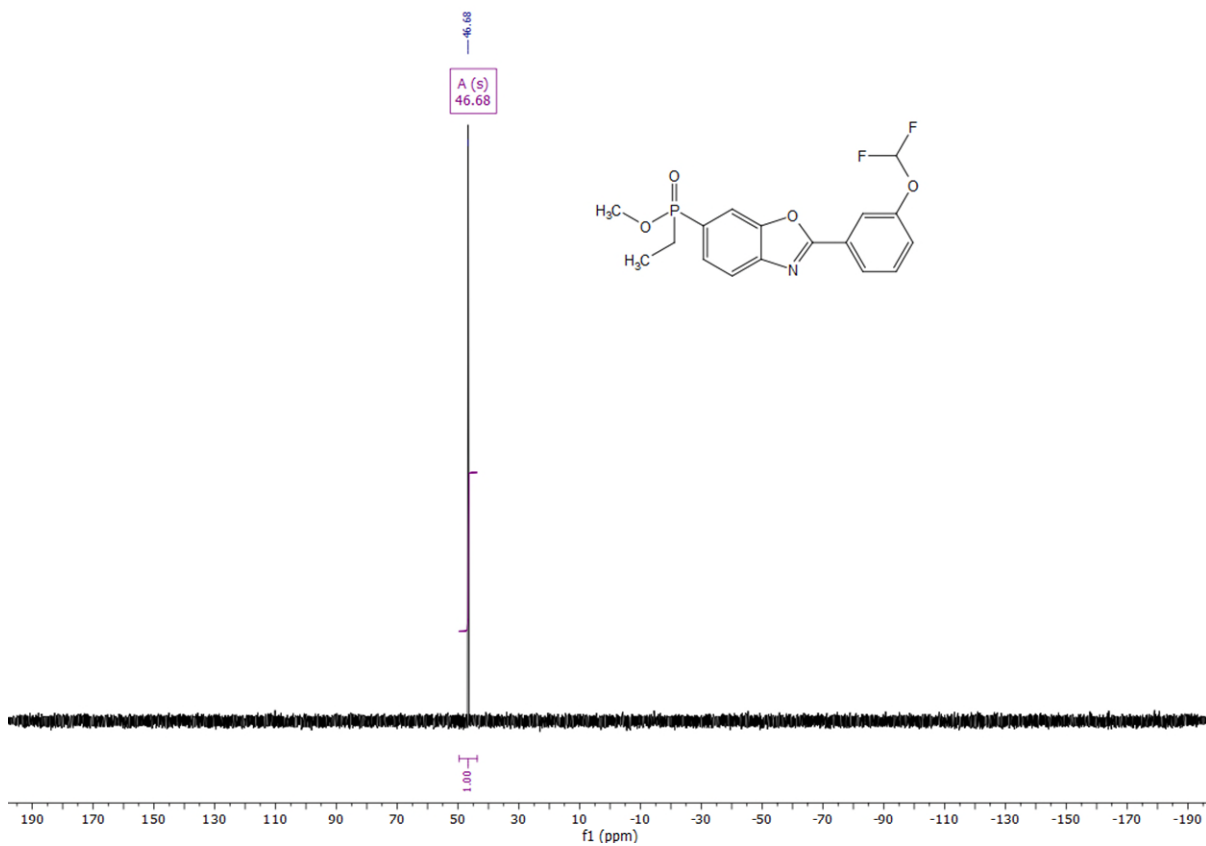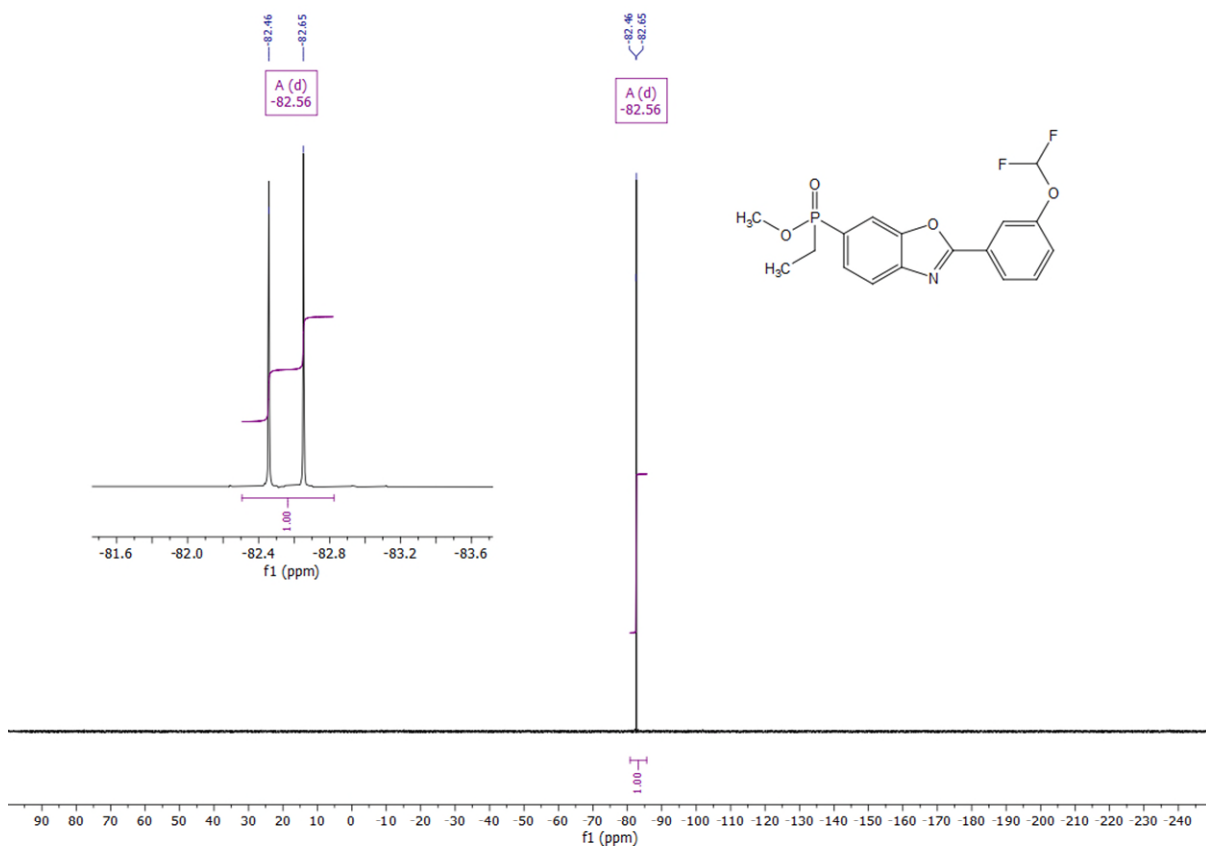

# methyl ethyl(2-(2-(trifluoromethyl)pyridin-3-yl)benzo[d]oxazol-6-yl)phosphinate (54)

## PDA Chromatogram

1: Wavelength 215 nm, Band Width 4 nm

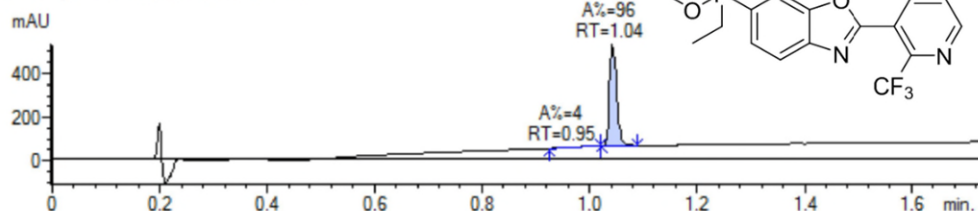

## MS Spectrum

Group#1 - PDA Peak: 5, RT: 1.02 to 1.09 min

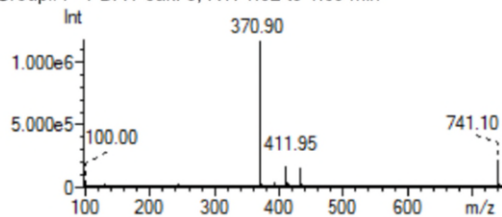

## MS Spectrum

Group#2 - PDA Peak: 5, RT: 1.02 to 1.09 min

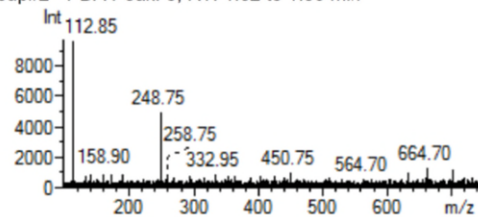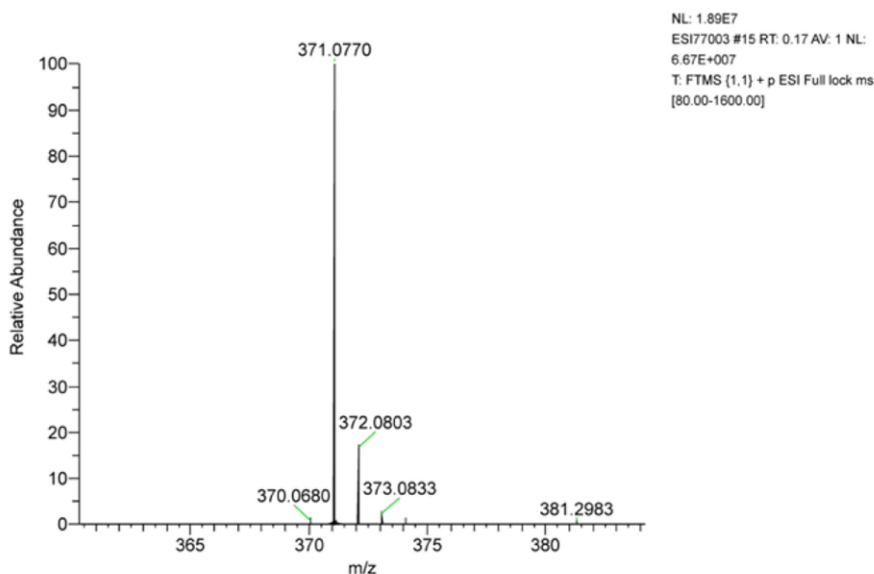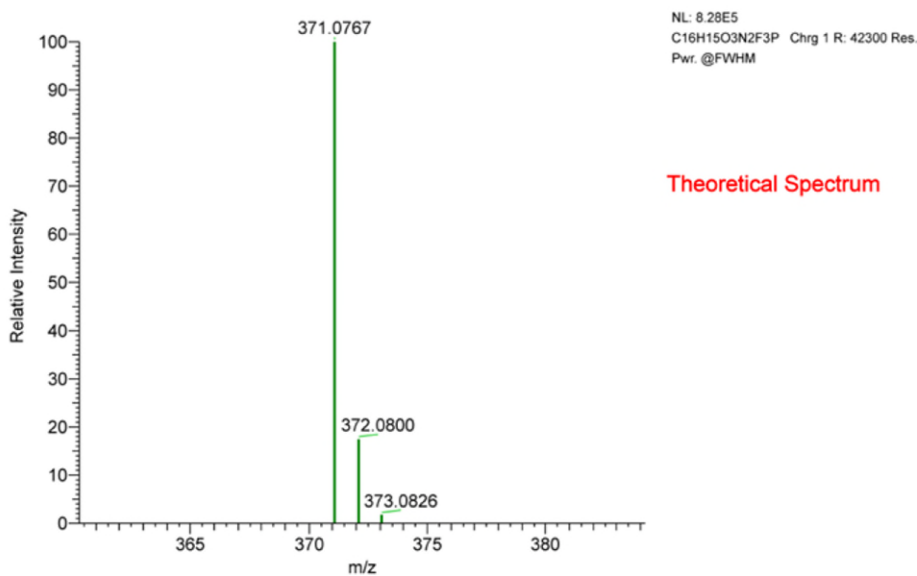

| Peak Mass Display... | Combin...                           | RDB       | Delta [p... | Theo. m... | Rank      | Combin... | # Match... | # Misse... | MS Cov... | Pattern... | MSMS...              |
|----------------------|-------------------------------------|-----------|-------------|------------|-----------|-----------|------------|------------|-----------|------------|----------------------|
| 371.0770             | C <sub>16</sub> H <sub>15</sub> ... | 43.114... | 9.50        | 0.74       | 371.07... | 1         | 96.931...  | 4          | 0         | 99.921...  | 99.855... (Collec... |

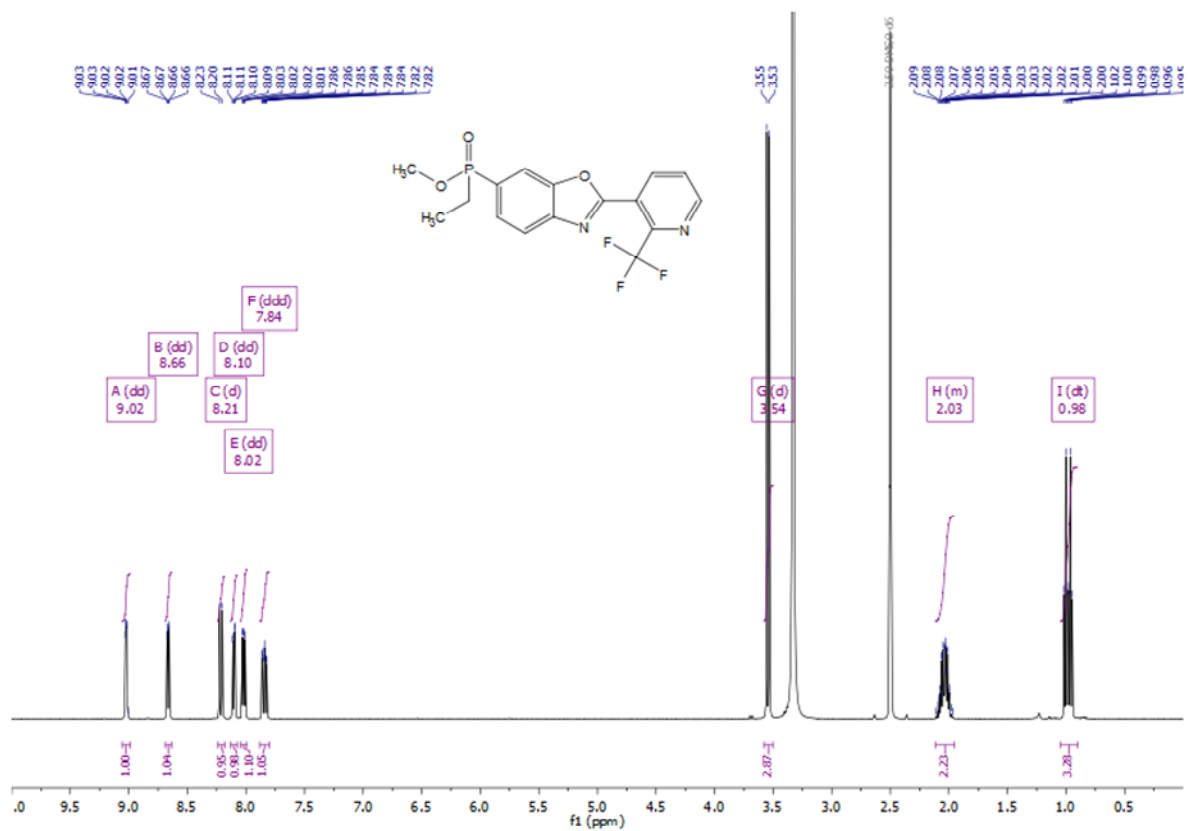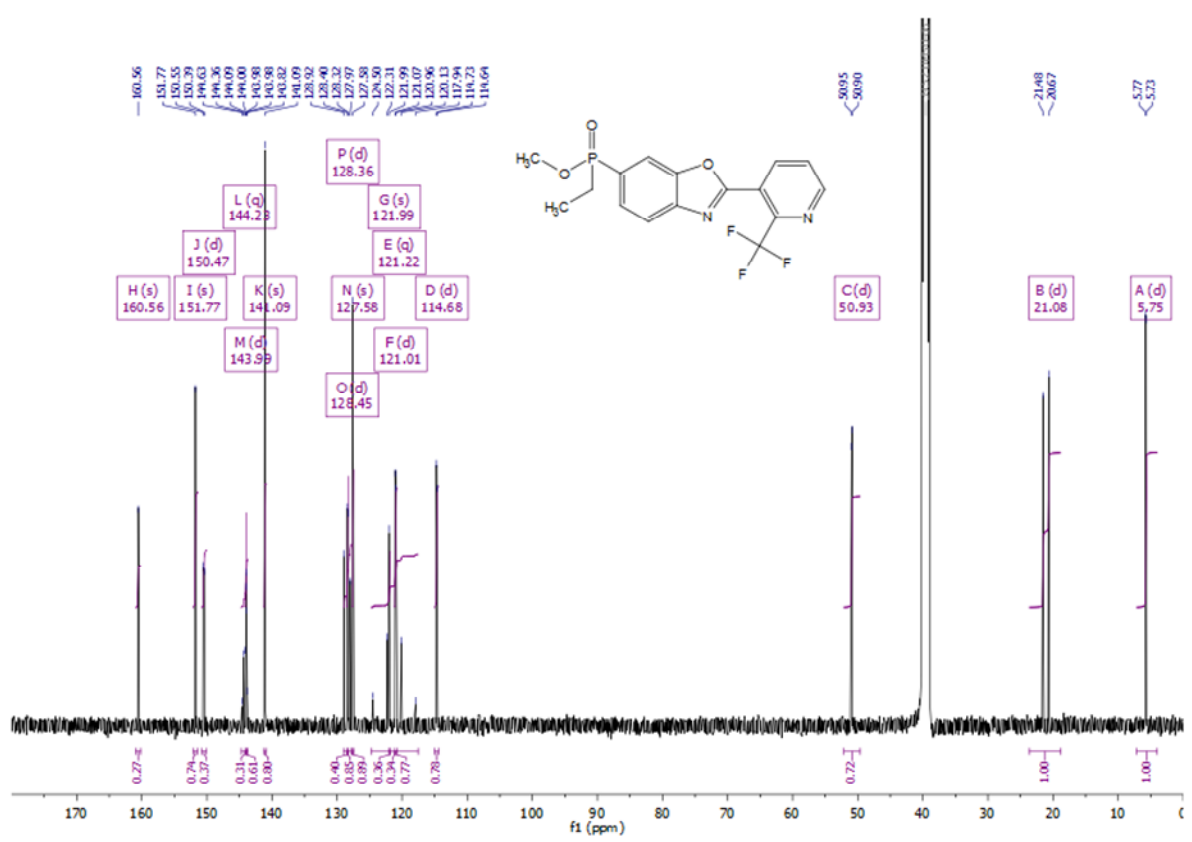

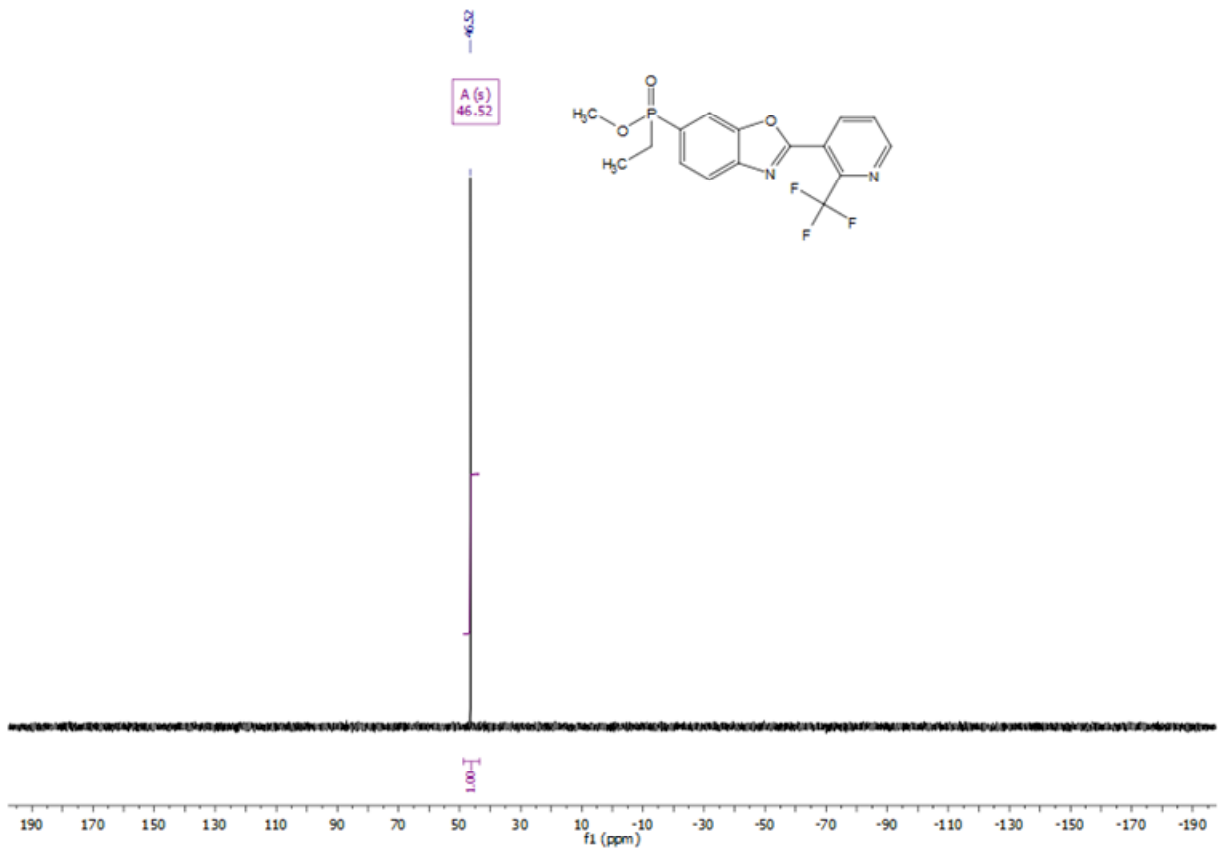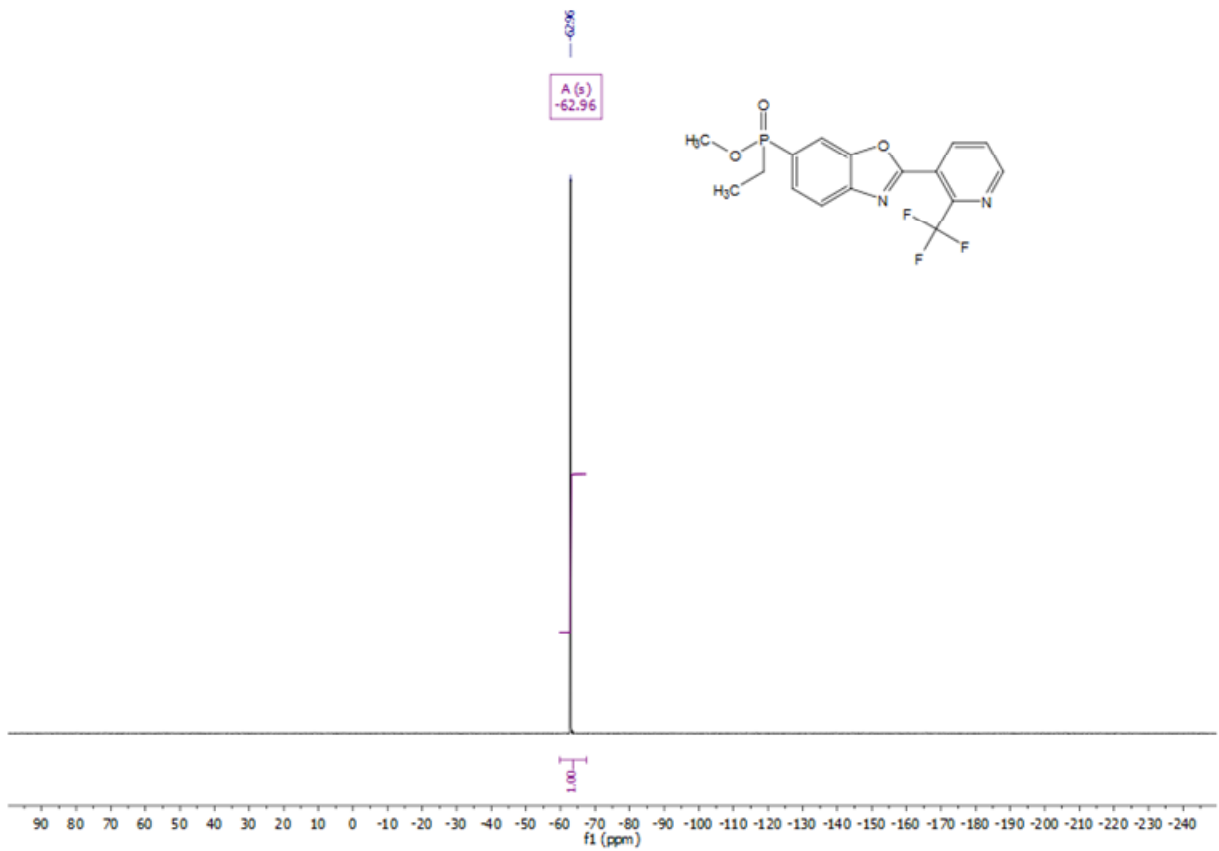

## References

1. Babbs, A.; Berg, A.; Chatzopoulou, M.; Davies, K. E.; Davies, S. G.; Edwards, B.; Elsey, D.; Emer, E.; Guiraud, S.; Harriman, S.; Lecci, C.; Moir, L.; Peters, D.; Robinson, N.; Rowley, J.; Russell, A. J.; Squire, S.; Tinsley, J.; Wilson, F.; Wynne, G. M., 2-Arylbenzo[d]oxazole phosphinate esters as second-generation modulators of utrophin for the treatment of Duchenne Muscular Dystrophy. *J Med Chem* **2020**  
<https://doi.org/10.1021/acs.jmedchem.0c00807>
2. Wynne, G. M.; Wren, S. P.; Johnson, P. D.; Price, D.; De Moor, O.; Nugent, G.; Tinsley, J. M.; Storer, R.; Mulvaney, A.; Pye, R. J.; Dorgan, C. R. Preparation of benzimidazoles, benzoxazoles, benzothiazoles, indoles and their analogs for the treatment of muscular dystrophy and cachexia. WO2007091106A2, 2007.
3. Auld, D. S.; Lovell, S.; Thorne, N.; Lea, W. A.; Maloney, D. J.; Shen, M.; Rai, G.; Battaile, K. P.; Thomas, C. J.; Simeonov, A.; Hanzlik, R. P.; Inglese, J., Molecular basis for the high-affinity binding and stabilization of firefly luciferase by PTC124. *Proc Natl Acad Sci U S A* **2010**, *107*, 4878-83, <https://doi.org/10.1073/pnas.0909141107>.
4. Feeney, K. A.; Putker, M.; Brancaccio, M.; O'Neill, J. S., In-depth Characterization of Firefly Luciferase as a Reporter of Circadian Gene Expression in Mammalian Cells. *Journal of Biological Rhythms* **2016**, *31*, 540-550, <https://doi.org/10.1177/0748730416668898>.
